# Supplementary material
Source: PubMed Central journal article supplement (PMC6919963)
Supplement: NIHMS1062661-supplement-SI.pdf [file NIHMS1062661-supplement-SI.pdf]

***Characterization of Leptazolines A-D, Polar  
Oxazolines from the Cyanobacterium  
Leptolyngbya sp., Reveals a Glitch with the  
“Willoughby-Hoye” Scripts for Calculating  
NMR Chemical Shifts***

*Jayanti Bhandari Neupane<sup>†</sup>, Ram P. Neupane<sup>†</sup>, Yuheng Luo<sup>†</sup>, Wesley Y. Yoshida<sup>†</sup>, Rui Sun<sup>†</sup>, Philip G. Williams<sup>†\*</sup>*

<sup>†</sup> Department of Chemistry, 2545 McCarthy Mall, Honolulu, HI 96822

**Corresponding Author**

Prof. Dr. Philip Williams, Department of Chemistry, University of Hawaii at Manoa,  
Honolulu, Hawaii, USA, 96822. E-mail: philipwi@hawaii.edu Phone: 808 956 5720 Fax:  
808 956 5908

## Contents

|                                                                                                        |    |
|--------------------------------------------------------------------------------------------------------|----|
| EXPERIMENTAL SECTION .....                                                                             | 4  |
| Table S1. NMR Spectroscopic Data of Compound 1 in MeOH- <i>d</i> <sub>4</sub> .....                    | 9  |
| Table S2. Comparison of Calculated and Experimental Chemical Shifts for Aromatic Substitutions.....    | 10 |
| The four diastereomers of compound 1.....                                                              | 11 |
| Table S3. Experimental and Computed Chemical Shifts of Compound 1.....                                 | 12 |
| Table S4. NMR Spectroscopic Data of Compound 2 in CD <sub>3</sub> OD.....                              | 13 |
| Table S5. Computed Chemical Shifts of a Truncated Version of 2 .....                                   | 14 |
| Figure S1. <sup>1</sup> H NMR Spectrum of Compound 1 in CD <sub>3</sub> OD (500 MHz) .....             | 16 |
| Figure S2. <sup>1</sup> H NMR Spectrum of Compound 1 in DMSO- <i>d</i> <sub>6</sub> (500 MHz).....     | 17 |
| Figure S3. <sup>13</sup> C NMR Spectrum of Compound 1 in CD <sub>3</sub> OD (125 MHz).....             | 18 |
| Figure S4. <sup>13</sup> C NMR Spectrum of Compound 1 in DMSO- <i>d</i> <sub>6</sub> (125 MHz).....    | 19 |
| Figure S5. COSY Spectrum of Compound 1 in CD <sub>3</sub> OD (500 MHz).....                            | 20 |
| Figure S6. COSY Spectrum of Compound 1 in DMSO- <i>d</i> <sub>6</sub> (500 MHz).....                   | 21 |
| Figure S7. HSQC Spectrum of Compound 1 in CD <sub>3</sub> OD (500 MHz) .....                           | 22 |
| Figure S8. HSQC Spectrum of Compound 1 in DMSO- <i>d</i> <sub>6</sub> (500 MHz).....                   | 23 |
| Figure S9. HMBC Spectrum of Compound 1 in CD <sub>3</sub> OD (500 MHz) .....                           | 24 |
| Figure S10. HMBC Spectrum of Compound 1 in DMSO- <i>d</i> <sub>6</sub> (500 MHz).....                  | 25 |
| Figure S11. <sup>15</sup> N HMBC Spectrum of Compound 1 in DMSO- <i>d</i> <sub>6</sub> (500 MHz) ..... | 26 |
| Figure S12. CIGAR Spectrum of Compound 1 in CD <sub>3</sub> OD (500 MHz).....                          | 27 |
| Figure S13. IR Spectrum of Compound 1 (CaF <sub>2</sub> disc).....                                     | 28 |
| Figure S14. UV-Vis Spectrum of Compound 1 in CH <sub>3</sub> OH .....                                  | 29 |
| Figure S15. <sup>1</sup> H NMR Spectrum of Compound 2 in CD <sub>3</sub> OD (500 MHz .....             | 30 |
| Figure S16. <sup>13</sup> C NMR Spectrum of Compound 2 in CD <sub>3</sub> OD (125 MHz).....            | 31 |
| Figure S17. COSY Spectrum of Compound 2 in CD <sub>3</sub> OD (500 MHz) .....                          | 32 |
| Figure S18. HSQC Spectrum of Compound 2 in CD <sub>3</sub> OD (500 MHz) .....                          | 33 |
| Figure S19. HMBC Spectrum of Compound 2 in CD <sub>3</sub> OD (500 MHz).....                           | 34 |
| Figure S20. <sup>15</sup> N HMBC Spectrum of Compound 2 in CD <sub>3</sub> OD (500 MHz).....           | 35 |
| Figure S21. ROESY Spectrum of Compound 2 in CD <sub>3</sub> OD (500 MHz).....                          | 36 |
| Figure S22. IR Spectrum of Compound 2 (CaF <sub>2</sub> disc).....                                     | 37 |
| Figure S23. UV-Vis Spectrum of Compound 2 in CH <sub>3</sub> OH .....                                  | 38 |
| Figure S24. <sup>1</sup> H NMR Spectrum of Compound 3 in CD <sub>3</sub> OD (500 MHz).....             | 39 |
| Figure S25. <sup>1</sup> H NMR Spectrum of Compound 4 in CD <sub>3</sub> OD (500 MHz).....             | 40 |
| Figure S26. <sup>1</sup> H NMR Spectrum of Compound 5 in CD <sub>3</sub> OD (500 MHz).....             | 41 |
| Figure S27. <sup>13</sup> C NMR Spectrum of Compound 5 in CD <sub>3</sub> OD (125 MHz).....            | 42 |
| Figure S28. COSY Spectrum of Compound 5 in CD <sub>3</sub> OD (500 MHz) .....                          | 43 |
| Figure S29. HSQC Spectrum of Compound 5 in CD <sub>3</sub> OD (500 MHz).....                           | 44 |
| Figure S30. HMBC Spectrum of Compound 5 in CD <sub>3</sub> OD (500 MHz).....                           | 45 |
| Figure S31. <sup>1</sup> H NMR Spectrum of Compound 6 in CD <sub>3</sub> OD (500 MHz).....             | 46 |
| Figure S32. <sup>13</sup> C NMR Spectrum of Compound 6 in CD <sub>3</sub> OD (125 MHz).....            | 47 |
| Figure S33. COSY Spectrum of Compound 6 in CD <sub>3</sub> OD (500 MHz) .....                          | 48 |
| Figure S34. HSQC Spectrum of Compound 6 in CD <sub>3</sub> OD (500 MHz).....                           | 49 |
| Figure S35. HMBC Spectrum of Compound 6 in CD <sub>3</sub> OD (500 MHz).....                           | 50 |
| Figure S36. <sup>1</sup> H NMR Spectrum of Compound 7 in CD <sub>3</sub> OD (500 MHz).....             | 51 |

|                                                                                               |     |
|-----------------------------------------------------------------------------------------------|-----|
| Figure S37. $^1\text{H}$ NMR Spectrum of Compound 8 in $\text{CD}_3\text{OD}$ (500 MHz) ..... | 52  |
| Figure S38. Growth Inhibition Curves for 2.....                                               | 53  |
| Figure S39. Micrographs of the Cyanobacterium O-2-5 .....                                     | 54  |
| Figure S40. 16S sRNA Sequence of the Cyanobacterium O-2-5 .....                               | 55  |
| Figure S41. 16S sRNA Phylogenetic Analysis of Strain O-2-5 .....                              | 56  |
| Table S6. Boltzmann Distribution of Conformers of $(3S^*,4S^*,5S^*)$ -1a.....                 | 57  |
| Table S7. Boltzmann Distribution of Conformers of $(3S^*,4S^*,5R^*)$ -1b .....                | 58  |
| Table S8. Boltzmann Distribution of Conformers of $(3R^*,4S^*,5R^*)$ -1c .....                | 59  |
| Table S9. Boltzmann Distribution of Conformers of $(3R^*,4S^*,5S^*)$ -1d .....                | 60  |
| Table S10. Boltzmann Distribution of Conformers of $(2S^*,3R^*,4S^*,5S^*)$ -2a.....           | 61  |
| Table S11. Boltzmann Distribution of Conformers of $(2S^*,3R^*,4S^*,5R^*)$ -2b.....           | 61  |
| Table S12. Boltzmann Distribution of Conformers of $(2S^*,3S^*,4S^*,5R^*)$ -2c.....           | 62  |
| Table S13. Boltzmann Distribution of Conformers of $(2S^*,3S^*,4S^*,5S^*)$ -2d.....           | 62  |
| Table S14. Boltzmann Distribution of Conformers of $(2R^*,3R^*,4S^*,5S^*)$ -2e .....          | 63  |
| Table S15. Boltzmann Distribution of Conformers of $(2R^*,3R^*,4S^*,5R^*)$ -2f .....          | 63  |
| Table S16. Boltzmann Distribution of Conformers of $(2R^*,3S^*,4S^*,5R^*)$ -2g .....          | 64  |
| Table S17. Boltzmann Distribution of Conformers of $(2R^*,3S^*,4S^*,5S^*)$ -2h.....           | 64  |
| XYZ Coordinates of Conformers for the Diastereomers of 1 .....                                | 65  |
| XYZ Coordinates of Conformers for the Diastereomers of 2 .....                                | 105 |
| References.....                                                                               | 129 |

## EXPERIMENTAL SECTION

**General experimental procedures.** Optical rotations were measured on a JASCO DIP-370 polarimeter at 589 nm using a sample cell of path length 0.1 dm. UV spectra were obtained on a Varian Cary 50 Bio UV-Visible spectrophotometer. IR spectra of the compounds, as thin films on CaF<sub>2</sub> discs, were recorded using a Shimadzu IRAffinity-1 Fourier Transform spectrophotometer. NMR spectra were acquired on a Varian Inova 500 MHz spectrometer operating at 500 (<sup>1</sup>H) or 125 (<sup>13</sup>C) MHz using the residual solvent signals as internal references (CD<sub>3</sub>OD δ<sub>H</sub> 3.30, δ<sub>C</sub> 49.0; DMSO-*d*<sub>6</sub> δ<sub>H</sub> 2.50, δ<sub>C</sub> 39.5; CDCl<sub>3</sub> δ<sub>H</sub> 7.26, δ<sub>C</sub> 77.0). Samples were placed in 3-mm Shigemi NMR tubes as necessary. HRMS data were obtained from an Agilent 6545 LC/QTOF instruments using electrospray ionization in positive and negative modes. Samples were purified using a combination of chromatographic techniques, including high performance liquid chromatography. Purity of the compounds was assessed from their UV absorptions at the appropriate wavelengths, or from their <sup>1</sup>H NMR spectra. Percent yields of natural products were based on the amount of freeze-dried biological material or crude extract from the culture broth.

**Biological material.** The strain O-2-5 (*Leptolyngbya* sp.) was obtained from the Patterson culture collection housed at the University of Hawaii at Manoa. This strain was originally collected from the Blaisdell Center in Honolulu in 1996 and it was identified as *Lyngbya limnetica* by Dr. Gregory Patterson based on its unbranched, long fine trichomes and very small cells. Subsequent 16S rRNA phylogenetic studies revised the identification to *Leptolyngbya* sp. Strain O-2-5 is an unbranched cyanobacterium with long fine straight trichomes and much smaller cells that clustered like a hairball.

**Cultivation.** The strain was cultured in 11 L BG-11 media with MOPS buffer, under continuous illumination and aeration (3-4 L air/min; no CO<sub>2</sub> added) for 30 days. Cells were filtered off from the suspension and the media was extracted using 25 g of HP-20 resin. The cells were freeze-dried to obtain 5.61 g of dry biomass from the initial harvest.

**Extraction, purification and isolation of metabolites.** For the initial screening, 570 mg of freeze-dried cells were extracted using 50 mL of 4:1 methanol and dichloromethane (3 times) to yield 111.4 mg of crude extract. The crude extract was fractionated on a C8 column (diameter 2.2 cm, height 1.2 cm) and each fraction was collected by eluting with an increasing concentration of methanol in water (15 mL total volume), followed by isopropanol (with 0.1% TFA). At the same time, HP-20 resin that had been soaked overnight in the media was separated from the medium and re-suspended in 100 mL of organic solvent (methanol) for 2 h. The solution was filtered off

to get rid of the resin and the solvent was removed *in vacuo* to yield 25 mg of the crude media extract. After screening all C8 fractions and the crude media extract at a test concentration of 50 µg/mL, the media extract was found to exhibit activity against PANC-1 cell lines.

The media extract was purified by RP-HPLC (Phenomenex Luna C18, 250 x 10 mm, 5 µm particle size, 100 Å) eluting with MeCN/H<sub>2</sub>O (with 0.1% formic acid) at 2.75 mL/min using the following gradient: 25% MeCN for 5 min, then a linear gradient to 70% MeCN over 30 min, and another gradient to 100% MeCN over 5 min, then a 10 min wash with MeCN. HPLC fractions were tested again in the PANC-1 assay at a test concentration of 20 µg/mL in order to identify compounds responsible for the growth inhibition. Due to the lack of sufficient material for structure elucidation, the culture was regrown several times in an effort to isolate sufficient quantities of the new natural products. There was considerable variability in the composition of the metabolites from the various growths and, as a result, material was combined from several extracts, based on LC-MS analysis, to allow for purification and isolation of the compounds of interest.

Like fractions (combined mass of 4.3 mg) showing LC-MS signals at ca.  $m/z$  300 [M+H]<sup>+</sup> were combined and purified by RP-HPLC (Phenomenex Luna C18, 250 x 10 mm, 5 µm particle size, 100 Å) eluting with MeCN/H<sub>2</sub>O at 2.75 mL/min using the following gradient: 25% MeCN for 5 min then a linear gradient to 45% MeCN over 20 min and then increasing to 100% MeCN over 5 min before a 10 min wash with MeCN, which yielded compounds **5** ( $t_R$  6.6 min, 0.8 mg, 1.1% yield, >99% purity by LC-UV detection at 315 nm) and **1** ( $t_R$  15.5 min, 1.0 mg, 1.4% yield, >99% purity by LC-UV detection at 315 nm).

Similarly, like fractions (3.9 mg) showing LC-MS signals at ca.  $m/z$  389 [M+H]<sup>+</sup> were purified by RP-HPLC (Phenomenex Luna C18, 250 x 10 mm, 5 µm particle size, 100 Å) eluting with MeOH/H<sub>2</sub>O at 2.75 mL/min using the following gradient: 45-85% MeOH over 20 min and then increasing to 100% MeOH over 5 min before a 10 min wash with MeOH, which yielded compounds **6** ( $t_R$  6.9 min, 1.0 mg, 0.55% yield, 90% purity by LC-UV detection at 315 nm) and **2** ( $t_R$  19.3 min, 1.0 mg, 0.55% yield, 96% purity by LC-UV detection at 315 nm).

From another harvest, purification of two fractions (1.8 mg and 9.1 mg) using the conditions described above led to the isolation of compound **3** ( $t_R$  18.5 min, 0.3 mg, 0.19% yield, >95% purity by <sup>1</sup>H NMR) and compound **4** ( $t_R$  14.5 min, 0.2 mg, 0.13% yield, isolated with other unidentified impurities). Further analysis and biological evaluation of these compounds was not possible because of the lack of sufficient material.

Leptazoline A (**1**): white, amorphous solid;  $[\alpha]_D^{22} +47$  (c 0.2, CH<sub>3</sub>OH); UV (CH<sub>3</sub>OH)  $\lambda_{\max}$  (log  $\epsilon$ ) 317 (3.45), 263 (3.25), 251 (3.58), 210 (4.36) nm; IR (CaF<sub>2</sub> disc)  $\nu_{\max}$  3600-2500 (br), 3381, 3206, 2986, 2920, 1694, 1682, 1639, 1574, 1246, 1101 cm<sup>-1</sup>; <sup>1</sup>H NMR (500 MHz, DMSO-*d*<sub>6</sub>) see Table 1; <sup>1</sup>H NMR (500 MHz, CD<sub>3</sub>OD)  $\delta$  7.58 (d, *J* = 2.7 Hz, 1H), 7.34 (dd, *J* = 8.9, 2.7 Hz, 1H), 6.93 (d, *J* = 8.9 Hz, 1H), 4.79 (p, *J* = 6.4 Hz, 1H), 4.10 (ddd, *J* = 7.8, 5.5, 3.4 Hz, 1H), 3.99 (dd, *J* = 6.7, 3.4 Hz, 1H), 2.57 – 2.46 (m, 2H), 1.45 (d, *J* = 6.3 Hz, 3H); <sup>13</sup>C NMR (125 MHz, DMSO-*d*<sub>6</sub>) see Table 1; <sup>13</sup>C NMR (125 MHz, CD<sub>3</sub>OD)  $\delta$  178.2, 165.7, 159.9, 134.1, 128.3, 124.2, 119.3, 113.2, 79.2, 77.5, 70.4, 41.1, 21.0; HRESIMS *m/z* 300.0630 [M+H]<sup>+</sup> (calcd for C<sub>13</sub>H<sub>15</sub>ClNO<sub>5</sub>, 300.0633).

Leptazoline B (**2**): off-white, amorphous solid;  $[\alpha]_D^{22} +44$  (c 0.2, CH<sub>3</sub>OH); UV (CH<sub>3</sub>OH)  $\lambda_{\max}$  (log  $\epsilon$ ) 315 (3.60), 262 (3.46), 251 (3.77), 210 (4.55) nm; IR (CaF<sub>2</sub> disc)  $\nu_{\max}$  3476, 3277, 2926, 1676, 1661, 1643, 1556, 1229, 1069 cm<sup>-1</sup>; <sup>1</sup>H NMR (500 MHz, CD<sub>3</sub>OD) see Table S4; <sup>13</sup>C NMR (125 MHz, CD<sub>3</sub>OD) see Table S4; HRESIMS *m/z* 389.1111 [M+H]<sup>+</sup> (calcd for C<sub>16</sub>H<sub>22</sub>ClN<sub>2</sub>O<sub>7</sub>, 389.1110).

Leptazoline C (**3**): white, amorphous solid; <sup>1</sup>H NMR (500 MHz, CD<sub>3</sub>OD)  $\delta$  7.65 (dd, *J* = 7.8, 1.7 Hz, 1H), 7.37 (ddd, *J* = 8.3, 7.6, 1.7 Hz, 1H), 6.94 (d, *J* = 8.3 Hz, 1H), 6.87 (t, *J* = 7.6 Hz, 1H), 4.78 (p, *J* = 6.3 Hz, 1H), 4.08 (ddd, *J* = 6.7, 6.3, 3.7 Hz, 1H), 3.98 (dd, *J* = 6.7, 3.7 Hz, 1H), 2.47 (m, 2H), 1.46 (d, *J* = 6.3 Hz, 3H); HRESIMS *m/z* 266.1019 [M+H]<sup>+</sup> (calcd for C<sub>13</sub>H<sub>16</sub>NO<sub>5</sub>, 266.1023).

Leptazoline D (**4**): off-white, amorphous solid; <sup>1</sup>H NMR (500 MHz, CD<sub>3</sub>OD)  $\delta$  7.63 (d, *J* = 7.8 Hz, 1H), 7.36 (t, *J* = 7.7 Hz, 1H), 6.92 (d, *J* = 8.3 Hz, 1H), 6.86 (t, *J* = 7.5 Hz, 1H), 4.79 (p, *J* = 6.5 Hz, 1H), 4.24 (dd, *J* = 6.9, 3.2 Hz, 1H), 4.19 (d, *J* = 7.4 Hz, 1H), 3.96 (p, *J* = 5.7 Hz, 1H), 3.74 (dd, *J* = 7.6, 3.3 Hz, 1H), 3.69-3.58 (m, 4H), 1.46 (d, *J* = 6.2 Hz, 3H); HRESIMS *m/z* 355.1496 [M+H]<sup>+</sup> (calcd for C<sub>16</sub>H<sub>23</sub>N<sub>2</sub>O<sub>7</sub>, 355.1500).

Compound **5**: <sup>1</sup>H NMR (500 MHz, CD<sub>3</sub>OD)  $\delta$  7.76 (d, *J* = 3.0 Hz, 1H), 7.01 (dd, *J* = 8.8, 3.0 Hz, 1H), 6.62 (d, *J* = 8.8 Hz, 1H), 4.27 (ddd, *J* = 7.3, 5.6, 3.4 Hz, 1H), 4.10 (m, 1H), 3.97 (t, *J* = 3.6 Hz, 1H), 2.41 – 2.33 (m, 2H), 1.20 (d, *J* = 6.3 Hz, 3H); <sup>13</sup>C NMR (125 MHz, CD<sub>3</sub>OD)  $\delta$  180.7, 180.4, 171.1, 133.0, 130.0, 124.7, 121.0, 118.1, 71.9, 70.3, 59.0, 42.9, 20.6; HRESIMS *m/z* 318.0737 [M+H]<sup>+</sup> (calcd for C<sub>13</sub>H<sub>17</sub>ClNO<sub>6</sub>, 318.0739).

Compound **6**: <sup>1</sup>H NMR (600 MHz, CD<sub>3</sub>OD)  $\delta$  7.93 (d, *J* = 2.7 Hz, 1H), 7.36 (dd, *J* = 8.8, 2.7 Hz, 1H), 6.93 (d, *J* = 8.7 Hz, 1H), 4.29 (dd, *J* = 4.3, 2.5 Hz, 1H), 4.13 (qd, *J* = 6.3, 4.3 Hz, 1H), 4.06 (dd, *J* = 7.2, 2.5 Hz, 1H), 3.97 (d, *J* = 7.0 Hz, 1H); 3.97 (m, 1H), 3.68 – 3.60 (m, 4H), 1.23 (d, *J* = 6.3 Hz, 3H); <sup>13</sup>C NMR (150 MHz, CD<sub>3</sub>OD)  $\delta$  173.9 (extrapolated from HMBC data), 169.1, 158.5, 134.2, 130.2, 125.2, 119.8, 119.8, 74.6, 73.1, 69.7, 61.9, 61.8, 56.1, 54.0, 20.6; HRESIMS *m/z* 407.1224 [M+H]<sup>+</sup> (calcd for C<sub>16</sub>H<sub>24</sub>ClN<sub>2</sub>O<sub>8</sub>, 407.1216).

**Acetylation of compound 1.** The reaction was carried out in an N<sub>2</sub> atmosphere using balloons. To 0.5 mg (1.7 μmol) of compound **1** in a reaction vial were added a drop of pyridine, 5 μL of acetic anhydride, and 0.5 mL dry CH<sub>2</sub>Cl<sub>2</sub>. The mixture was stirred at room temperature for 1 h. An additional 0.5 mL CH<sub>2</sub>Cl<sub>2</sub> was added to the vial and the contents were washed sequentially with aq. NaHCO<sub>3</sub> (1 mL) and brine (1 mL). The organic layer was then dried over anhydrous MgSO<sub>4</sub> and filtered. Upon removal of the solvent by evaporation under a stream of N<sub>2</sub>, 0.6 mg of crude solid was obtained. The residue was purified by RP-HPLC (Phenomenex Luna C18, 150 x 4.6 mm, 5 μm particle size, 100 Å) eluting with CH<sub>3</sub>OH in H<sub>2</sub>O at 0.7 mL/min using a linear gradient from 50% CH<sub>3</sub>OH in H<sub>2</sub>O to 100% CH<sub>3</sub>OH over 20 min, which yielded compound **7** (*t*<sub>R</sub> 6.4 min, 0.1 mg, 0.3 μmol, 17% yield, isolated with unidentified impurities) and compound **8** (*t*<sub>R</sub> 7.8 min, 0.3 mg, 0.9 μmol, 52% yield).

3-Acetyl-**1** (**7**): <sup>1</sup>H NMR (500 MHz, CD<sub>3</sub>OD) δ 7.57 (d, *J* = 2.7 Hz, 1H), 7.36 (dd, *J* = 8.9, 2.7 Hz, 1H), 6.94 (d, *J* = 8.9 Hz, 1H), 5.44 (td, *J* = 7.0, 3.8 Hz, 1H), 4.67 (p, *J* = 6.3 Hz, 1H), 4.23 (dd, *J* = 6.3, 3.8 Hz, 1H), 2.60-2.52 (m, 2H), 1.98 (s, 3H), 1.44 (d, *J* = 6.3 Hz, 3H); HRESIMS *m/z* 342.0743 [M+H]<sup>+</sup> (calcd for C<sub>15</sub>H<sub>16</sub>ClNO<sub>6</sub>, 342.0739).

9-Acetyl-**1** (**8**): <sup>1</sup>H NMR (500 MHz, CD<sub>3</sub>OD) δ 7.57 (d, *J* = 2.6 Hz, 1H), 7.33 (dd, *J* = 8.9, 2.7 Hz, 1H), 6.92 (d, *J* = 9.0 Hz, 1H), 4.79 (m, 1H), 4.05 (m, 1H), 3.98 (dd, *J* = 6.8, 3.5 Hz, 1H), 2.45 (m, 2H), 1.88 (s, 3H), 1.45 (d, *J* = 6.3 Hz, 3H).

**NMR shift Calculations.** Conformers of all diastereomers of **1** and **2** within 5 kcal/mol of the lowest energy conformer were searched using the Monte Carlo multiple minimum (MCMM) method and the OPLS-2005 force field in MacroModel<sup>1</sup> (Schrodinger Inc.). Each conformer within 5 kcal/mol of the lowest energy conformer was optimized in Gaussian09 at the M06-2X<sup>2</sup>/6-31+G level and the geometries of all conformers with similar energies were checked for redundancy. NMR shielding tensors of all unique conformers within the energy window were computed using the gauge-independent atomic orbital (GIAO) method at the B3LYP<sup>3-6</sup>/6-311+G<sup>7, 8</sup> level and <sup>1</sup>H and <sup>13</sup>C chemical shifts were obtained after applying appropriate scaling factors (<sup>1</sup>H: intercept = 31.9477, slope = -1.0767; <sup>13</sup>C: intercept = 181.2412, slope = -1.0522). Statistical comparisons of the computed shifts with the experimental data were carried out using the spreadsheet provided by Sarotti.<sup>9</sup>

The new scripts were tested using Python V3 (Windows 10 using Anaconda 1.9.6 running Python 3.7.1; Python 3.6.5 on Mac Mavericks; Python 3.7.1 on Mac Mojave) and Python V2 (Python 2.7.10 on Mac El Capitan 10.11.6; Python 2.7.16 on Mac Mojave).

**Growth inhibitory assay.** Human pancreatic carcinoma (PANC-1) cell lines were maintained in DMEM media supplemented with 10% premium fetal bovine serum and 50 U/mL penicillin and 50 µg/mL streptomycin. One day before treatment, cancer cells were seeded at 5,000 cells per well into a 96-well tissue culture plate. Twenty-four hours post seeding, the serially diluted compounds were added to the cells for the growth inhibition assay, and incubated at 37 °C with 5% CO<sub>2</sub> for 72 h. Then, 40 µL MTS dye (Cell Titer aqueous One Solution Cell Proliferation Assay) was added to each well and incubated with 5% CO<sub>2</sub> at 37 °C for 90 minutes. Cell viability data were collected with a Modulus Microplate Reader and GI<sub>50</sub> curves were generated using GraphPad Prism 5. For GI<sub>50</sub> determination, samples were tested in triplicate at each concentration and the results were averaged. Three consecutive biological replicates were collected and average GI<sub>50</sub> values were calculated.



**Table S1. NMR Spectroscopic Data of Compound 1 in MeOH-*d*<sub>4</sub>**

| C/H# | $\delta_C$ , type     | $\delta_H$ (J in Hz)      | COSY   | HMBC <sup>a</sup> |
|------|-----------------------|---------------------------|--------|-------------------|
| 1    | 178.2, C              |                           |        |                   |
| 2    | 41.1, CH <sub>2</sub> | 2.54, dd (14.7, 5.1)      | 3      | 1, 3, 4           |
|      |                       | 2.50, dd (14.7, 6.7)      | 3      |                   |
| 3    | 70.4, CH              | 4.10, ddd (7.8, 5.5, 3.4) | 2, 4   | 1,2, 5            |
| 4    | 77.5, CH              | 3.99, dd (6.7, 3.4)       | 3, 5   | 2, 3, 5, 7, 8     |
| 5    | 79.2, CH              | 4.79, p (6.4)             | 4, 6   | 3, 7              |
| 6    | 21.0, CH <sub>3</sub> | 1.45, d (6.3)             |        | 4, 5              |
| 7    | 165.7, C              |                           |        |                   |
| 8    | 113.2, C              |                           |        |                   |
| 9    | 159.9, C              |                           |        |                   |
| 10   | 119.3, CH             | 6.93, d (8.9)             | 11     | 7, 8, 9, 12       |
| 11   | 134.1, CH             | 7.34, dd (8.9, 2.7)       | 10, 11 | 9, 12, 13         |
| 12   | 124.2, C              |                           |        |                   |
| 13   | 128.3, CH             | 7.58, d (2.7)             | 11     | 7, 9, 11, 12      |
| NH   |                       | 12.28, brs                |        |                   |

<sup>a</sup> HMBC correlations, optimized for 7 Hz, are from proton(s) stated to the indicated carbon

**Table S2. Comparison of Calculated and Experimental Chemical Shifts for Aromatic Substitutions**

| Pos <sup>a</sup> | Exp. <sup>a</sup> | A <sup>b</sup> | B <sup>b</sup> | C <sup>b</sup> | D <sup>b</sup> | E <sup>b</sup> | F <sup>b</sup> |
|------------------|-------------------|----------------|----------------|----------------|----------------|----------------|----------------|
| 8                | 113.2, C          | 129.6          | 127.3          | 110.7          | 127.4          | 121.0          | 111.0          |
| 9 (OH)           | 159.9, C          | 158.4          | 151.6          | 155.7          | 154.8          | 156.8          | 158.3          |
| 10               | 119.3, CH         | 117.9          | 128.4          | 118.5          | 132.1          | 130.4          | 129.8          |
| 11               | 134.1, CH         | 127.5          | 122.7          | 131.8          | 119.0          | 114.6          | 121.0          |
|                  | 124.2, C          | 120.8          | 122.6          | 125.0          | 126.2          | 136.2          | 138.6          |
| 13               | 128.3, CH         | 129.3          | 115.4          | 128.9          | 116.4          | 116.7          | 116.6          |
| MAE              |                   | 5.1            | 9.6            | 1.9            | 10.2           | 10.9           | 8.9            |

<sup>a</sup> Numbered for **A-F** as below with C9 as C-OH and C12 as C-Cl always, C13 corresponding to the carbon bearing the proton that gives rise to the doublet observed in the <sup>1</sup>H NMR spectrum with a meta coupling to H-13, which defines the position of C13.

<sup>b</sup> <sup>13</sup>C NMR Chemical shifts calculated using ACD Labs Prediction V12

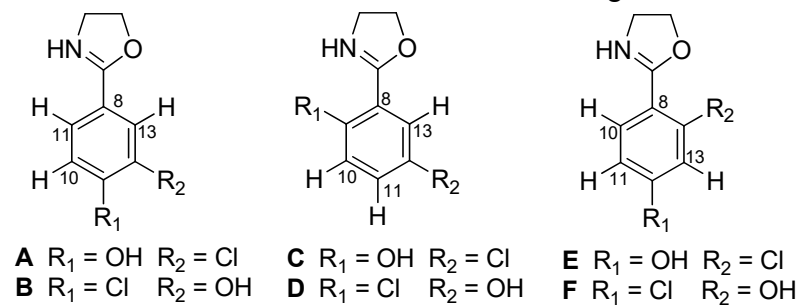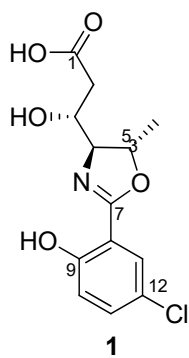

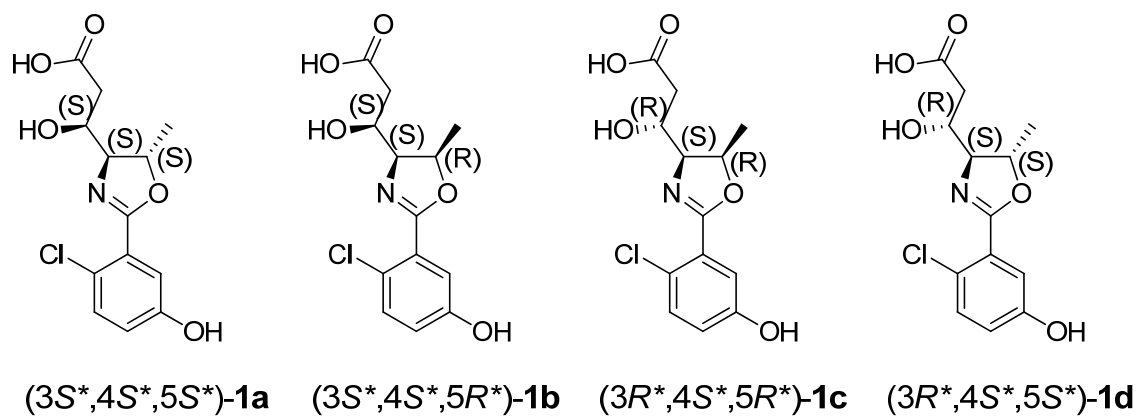

**The four diastereomers of compound 1**

**Table S3. Experimental and Computed Chemical Shifts of Compound 1**

| Nuclei        | Position | Experimental $\delta$ | Computed $\delta$ |             |           |              |
|---------------|----------|-----------------------|-------------------|-------------|-----------|--------------|
|               |          | <b>1</b>              | <b>1a</b>         | <b>1b</b>   | <b>1c</b> | <b>1d</b>    |
| H             | 2a       | 2.53                  | 2.55              | 2.88        | 2.86      | 2.76         |
|               | 2b       | 2.53                  | 2.55              | 2.92        | 2.85      | 2.82         |
|               | 3        | 4.10                  | 4.46              | 4.15        | 4.31      | 3.96         |
|               | 4        | 3.99                  | 4.03              | 4.43        | 4.40      | 3.96         |
|               | 5        | 4.79                  | 4.70              | 4.96        | 4.97      | 4.70         |
|               | 6        | 1.45                  | 1.42              | 1.42        | 1.53      | 1.45         |
|               | 10       | 6.93                  | 6.90              | 6.88        | 6.91      | 6.90         |
|               | 11       | 7.34                  | 7.34              | 7.33        | 7.35      | 7.35         |
|               | 13       | 7.58                  | 7.64              | 7.64        | 7.68      | 7.66         |
|               |          |                       | MAE (all)         | <b>0.07</b> | 0.17      | 0.18         |
|               |          | MAE (H3-H5)           | 0.16              | 0.22        | 0.27      | <b>0.09</b>  |
| C             | 1        | 178.2                 | 172.0             | 173.2       | 172.1     | 172.0        |
|               | 2        | 41.1                  | 34.9              | 37.7        | 40.0      | 38.0         |
|               | 3        | 70.4                  | 68.0              | 68.4        | 66.1      | 69.5         |
|               | 4        | 77.5                  | 76.4              | 70.5        | 70.3      | 76.4         |
|               | 5        | 79.2                  | 74.9              | 78.4        | 78.5      | 77.9         |
|               | 6        | 21.0                  | 19.4              | 13.3        | 14.7      | 18.9         |
|               | 7        | 165.7                 | 162.7             | 162.5       | 163.3     | 163.2        |
|               | 8        | 113.2                 | 109.6             | 109.8       | 109.7     | 109.5        |
|               | 9        | 159.9                 | 156.6             | 156.5       | 156.4     | 156.5        |
|               | 10       | 119.3                 | 115.6             | 115.5       | 115.5     | 115.5        |
|               | 11       | 134.1                 | 131.6             | 131.6       | 131.7     | 131.7        |
|               | 12       | 124.2                 | 126.6             | 126.6       | 126.6     | 126.6        |
|               | 13       | 128.3                 | 125.7             | 125.6       | 125.8     | 125.8        |
|               |          | MAE (all)             | 3.3               | 3.6         | 3.6       | <b>2.7</b>   |
|               |          | MAE (C3-C5)           | 2.6               | 3.3         | 4.1       | <b>1.1</b>   |
| Probabilities | sDP4+    | H                     | <b>0.916</b>      | 0.001       | 0.000     | 0.083        |
|               |          | C                     | 0.003             | 0.000       | 0.000     | <b>0.997</b> |
|               |          | all                   | 0.033             | 0.000       | 0.000     | <b>0.967</b> |

Key:

**1a** = (3*S*\*,4*S*\*,5*S*\*)-1;    **1b** = (3*S*\*,4*S*\*,5*R*\*)-1;**1c** = (3*R*\*,4*S*\*,5*R*\*)-1;    **1d** = (3*R*\*,4*S*\*,5*S*\*)-1

**Table S4. NMR Spectroscopic Data of Compound 2 in CD<sub>3</sub>OD**

| Pos.  | $\delta_C$ , type     | $\delta_H$ (J in Hz) | COSY   | HMBC <sup>a</sup> | ROESY   |
|-------|-----------------------|----------------------|--------|-------------------|---------|
| 1     | 175.6, C              |                      |        |                   |         |
| 2     | 73.5, CH              | 4.18, d (7.4)        | 3      | 1, 3, 4           | 4, 3    |
| 3     | 74.2, CH              | 3.75, dd (7.5, 3.3)  | 2, 4   | 1, 2, 5           | 2, 4, 5 |
| 4     | 74.3, CH              | 4.26, dd (6.7, 3.2)  | 3, 5   | 6, 7, 2, 3, 8     | 2, 3, 6 |
| 5     | 79.3, CH              | 4.81, p (6.3)        | 4, 6   | 3, 7              | 3, 6    |
| 6     | 20.8, CH <sub>3</sub> | 1.46, d (6.3)        | 5      | 5, 4              | 4, 5    |
| 7     | 165.8, C              |                      |        |                   |         |
| 8     | 113.2, C              |                      |        |                   |         |
| 9     | 160.0, C              |                      |        |                   |         |
| 10    | 119.3, CH             | 6.93, d (8.8)        | 11     | 7, 8, 9, 12       | 11      |
| 11    | 134.2, CH             | 7.34, dd (8.8, 2.7)  | 10, 13 | 9, 12, 13         | 10, 13  |
| 12    | 124.2, C              |                      |        |                   |         |
| 13    | 128.3, CH             | 7.58, d (2.6)        | 11     | 7, 9, 11, 12      | 11      |
| 1'    | 54.0, CH              | 3.96, p (5.5)        | 2', 3' | 2', 3', 1         | 2', 3'  |
| 2'/3' | 61.7, CH <sub>2</sub> | 3.69-3.56, m         | 1'     | 1', 2'            | 1', 2'  |

**Table S5. Computed Chemical Shifts of a Truncated Version of 2**

| Nuclei              | Pos. | Experimental $\delta$ |             | Computed $\delta$ |           |           |             |             |           |           |              |            |
|---------------------|------|-----------------------|-------------|-------------------|-----------|-----------|-------------|-------------|-----------|-----------|--------------|------------|
|                     |      | <b>2</b>              |             | <b>2a</b>         | <b>2b</b> | <b>2c</b> | <b>2d</b>   | <b>2e</b>   | <b>2f</b> | <b>2g</b> | <b>2h</b>    |            |
| H                   | 2    | 4.18                  |             | 4.04              | 4.33      | 4.38      | 4.24        | 4.62        | 4.66      | 4.06      | 4.22         |            |
|                     | 3    | 3.75                  |             | 3.94              | 4.34      | 4.13      | 3.85        | 4.50        | 4.90      | 4.12      | 3.38         |            |
|                     | 4    | 4.26                  |             | 4.28              | 4.36      | 4.21      | 4.24        | 4.05        | 4.17      | 4.60      | 4.52         |            |
|                     | 5    | 4.81                  |             | 4.84              | 5.12      | 4.76      | 4.63        | 5.07        | 4.96      | 4.87      | 4.68         |            |
|                     | 6    | 1.46                  |             | 1.55              | 1.41      | 1.63      | 1.43        | 1.55        | 1.43      | 1.41      | 1.37         |            |
|                     | 10   | 6.93                  |             | 6.90              | 6.91      | 6.90      | 6.90        | 6.90        | 6.92      | 6.91      | 6.91         |            |
|                     | 11   | 7.34                  |             | 7.34              | 7.34      | 7.33      | 7.35        | 7.34        | 7.35      | 7.36      | 7.35         |            |
|                     | 13   | 7.58                  |             | 7.64              | 7.68      | 7.59      | 7.65        | 7.62        | 7.67      | 7.67      | 7.67         |            |
|                     |      |                       |             | MAE (all)         | 0.07      | 0.17      | 0.11        | <b>0.06</b> | 0.23      | 0.25      | 0.13         | 0.13       |
|                     |      |                       |             | MAE (H2-H5)       | 0.10      | 0.29      | 0.17        | <b>0.09</b> | 0.41      | 0.47      | 0.22         | 0.20       |
| C                   | 1    | 175.                  |             | 169.6             | 169.5     | 172.1     | 171.        | 169.8       | 169.9     | 171.6     | 170.1        |            |
|                     | 2    | 73.5                  |             | 71.7              | 72.9      | 74.8      | 72.2        | 74.2        | 74.1      | 72.3      | 73.2         |            |
|                     | 3    | 74.2                  |             | 74.3              | 74.6      | 68.4      | 73.7        | 71.6        | 73.8      | 70.6      | 75.4         |            |
|                     | 4    | 74.3                  |             | 72.9              | 68.6      | 68.2      | 72.2        | 73.9        | 67.7      | 67.9      | 71.9         |            |
|                     | 5    | 79.3                  |             | 75.4              | 78.8      | 78.5      | 77.8        | 75.9        | 80.1      | 77.1      | 78.1         |            |
|                     | 6    | 20.8                  |             | 18.6              | 15.9      | 12.6      | 18.4        | 18.4        | 16.6      | 13.1      | 18.9         |            |
|                     | 7    | 165.                  |             | 162.7             | 163.2     | 163.3     | 163.        | 162.9       | 163.8     | 163.4     | 163.6        |            |
|                     | 8    | 113.                  |             | 109.6             | 110.0     | 109.7     | 109.        | 109.5       | 110.1     | 109.6     | 109.5        |            |
|                     | 9    | 160.                  |             | 156.6             | 156.7     | 156.9     | 156.        | 156.8       | 156.7     | 156.6     | 156.7        |            |
|                     | 10   | 119.                  |             | 115.5             | 115.5     | 115.6     | 115.7       | 115.6       | 115.6     | 115.7     | 115.7        |            |
|                     | 11   | 134.                  |             | 131.6             | 131.6     | 131.5     | 131.        | 131.6       | 131.7     | 131.9     | 131.8        |            |
|                     | 12   | 124.                  |             | 126.5             | 126.6     | 126.4     | 126.        | 126.4       | 126.6     | 126.7     | 126.6        |            |
|                     | 13   | 128.                  |             | 125.7             | 125.6     | 125.6     | 125.        | 125.6       | 125.6     | 125.8     | 125.8        |            |
|                     |      |                       |             | MAE (all)         | 2.8       | 3.0       | 3.5         | <b>2.5</b>  | 2.8       | 2.9       | 3.5          | <b>2.5</b> |
|                     |      |                       | MAE (C2-C5) | 1.8               | 1.8       | 3.5       | 1.4         | 1.8         | 2.1       | 3.4       | <b>1.3</b>   |            |
| Probabilities sDP4+ | H    |                       |             | 0.349             | 0.003     | 0.030     | <b>0.59</b> | 0.000       | 0.001     | 0.009     | 0.012        |            |
|                     | C    |                       |             | 0.019             | 0.003     | 0.000     | 0.46        | 0.023       | 0.005     | 0.000     | <b>0.481</b> |            |
|                     | all  |                       |             | 0.022             | 0.000     | 0.000     | <b>0.95</b> | 0.000       | 0.000     | 0.000     | 0.021        |            |

Key: **2a** = (2S\*,3R\*,4S\*,5S\*)-**2a**; **2b** = (2S\*,3R\*,4S\*,5R\*)-**2a**; **2c** = (2S\*,3S\*,4S\*,5R\*)-**2a**;  
**2d** = (2S\*,3S\*,4S\*,5S\*)-**2a**; **2e** = (2R\*,3R\*,4S\*,5S\*)-**2a**; **2f** = (2R\*,3R\*,4S\*,5R\*)-**2a**; **2g** =  
(2R\*,3S\*,4S\*,5R\*)-**2a**; **2h** = (2R\*,3S\*,4S\*,5S\*)-**2a**

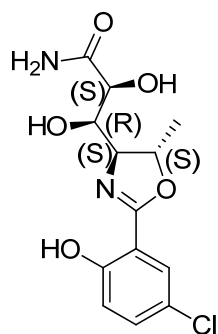

**(2S\*,3R\*,4S\*,5S\*)-2a**

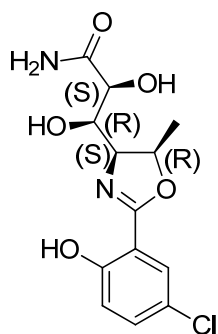

**(2S\*,3R\*,4S\*,5R\*)-2b**

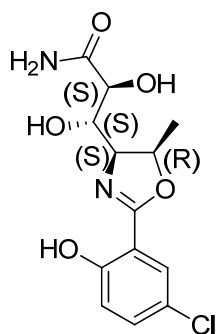

**(2S\*,3S\*,4S\*,5R\*)-2c**

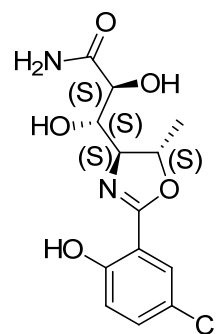

**(2S\*,3S\*,4S\*,5S\*)-2d**

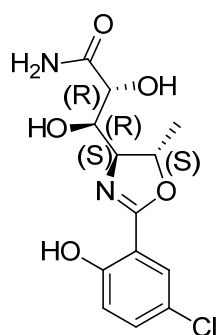

**(2R\*,3R\*,4S\*,5S\*)-2e**

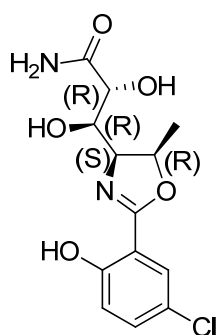

**(2R\*,3R\*,4S\*,5R\*)-2f**

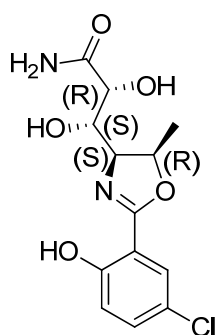

**(2R\*,3S\*,4S\*,5R\*)-2g**

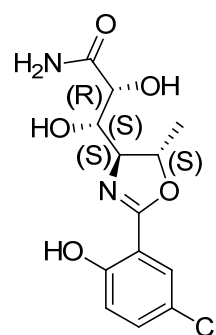

**(2R\*,3S\*,4S\*,5S\*)-2h**

Figure S1. <sup>1</sup>H NMR Spectrum of Compound 1 in CD<sub>3</sub>OD (500 MHz)

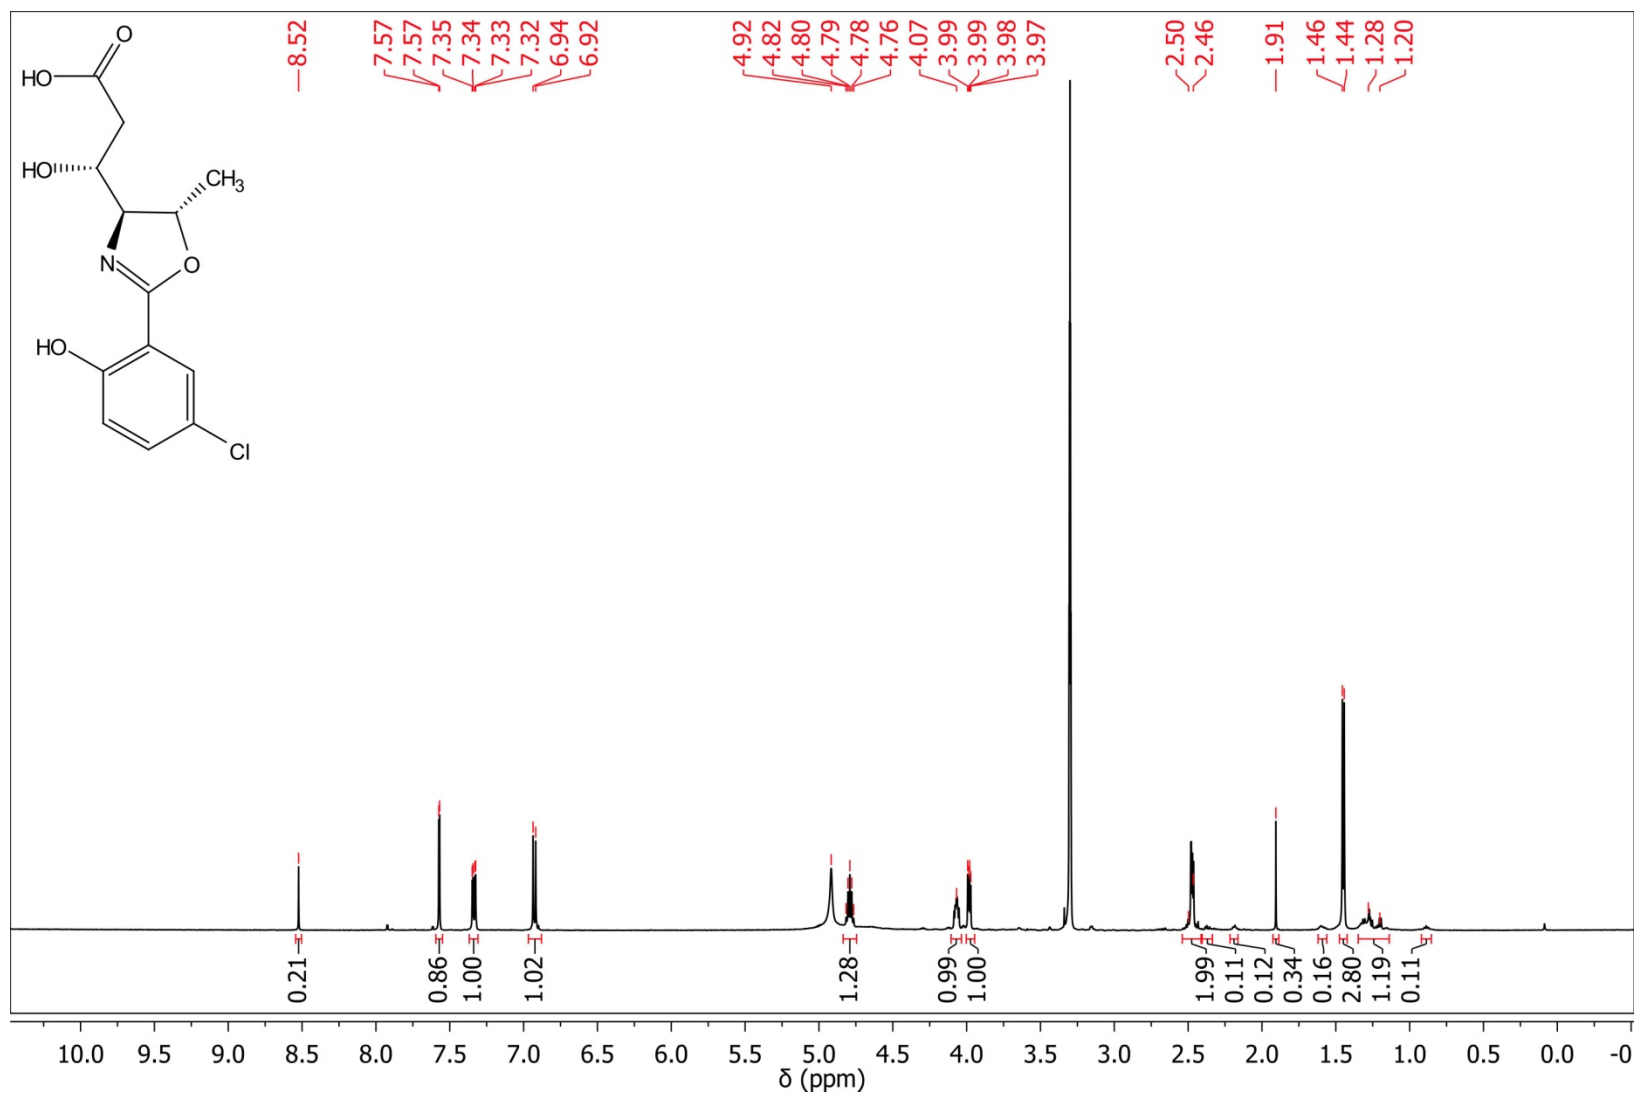



Figure S2. <sup>1</sup>H NMR Spectrum of Compound 1 in DMSO-d<sub>6</sub> (500 MHz)

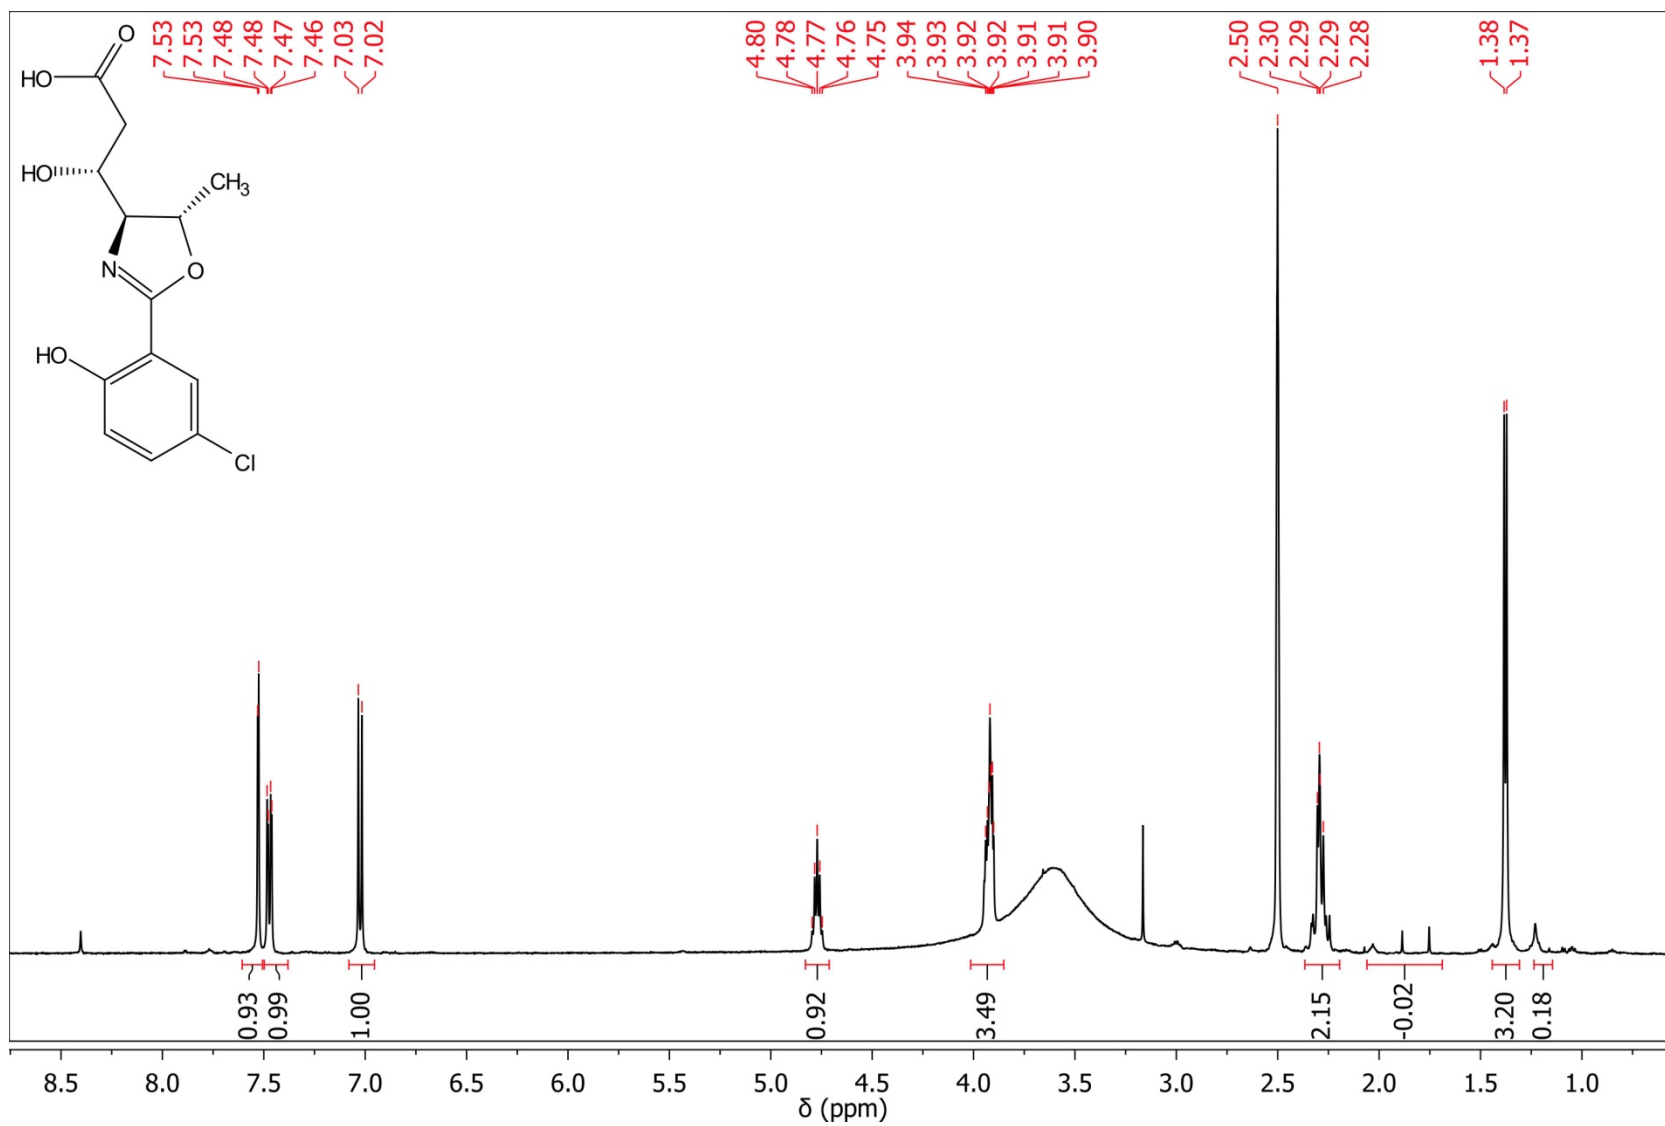

Figure S3.  $^{13}\text{C}$  NMR Spectrum of Compound 1 in  $\text{CD}_3\text{OD}$  (125 MHz)

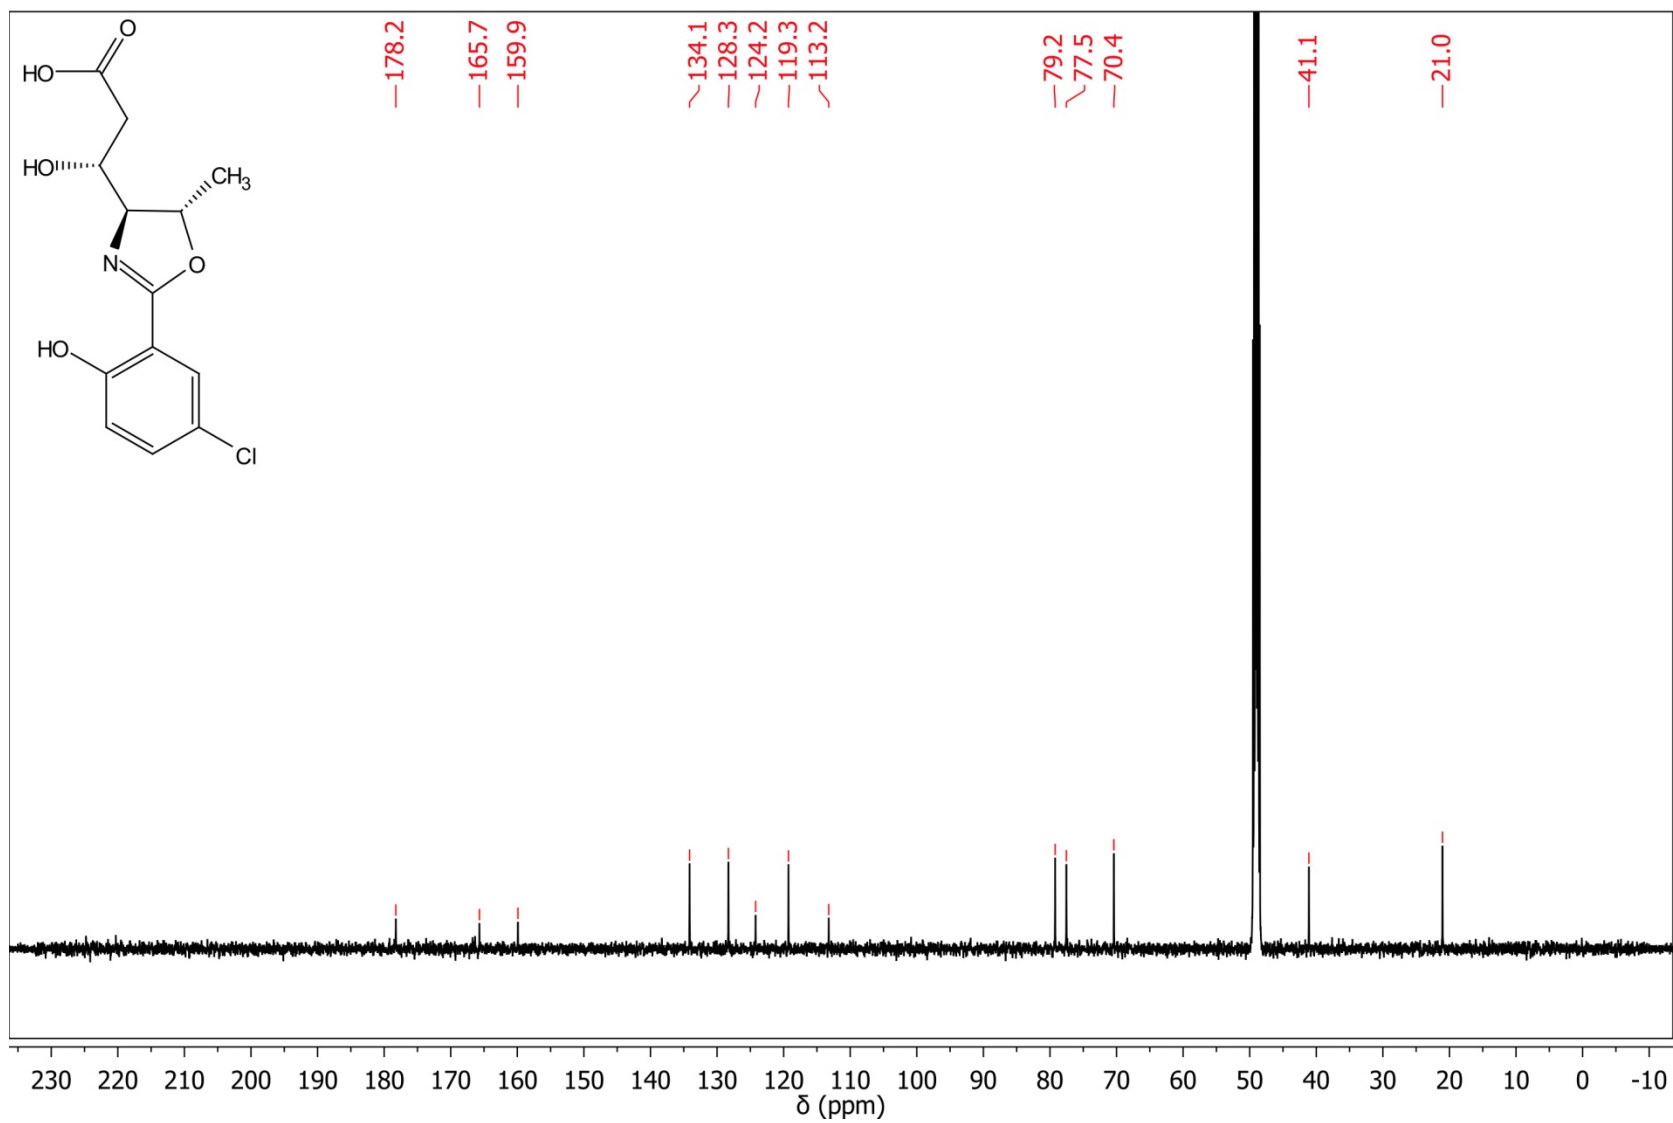

Figure S4.  $^{13}\text{C}$  NMR Spectrum of Compound 1 in  $\text{DMSO-}d_6$  (125 MHz)

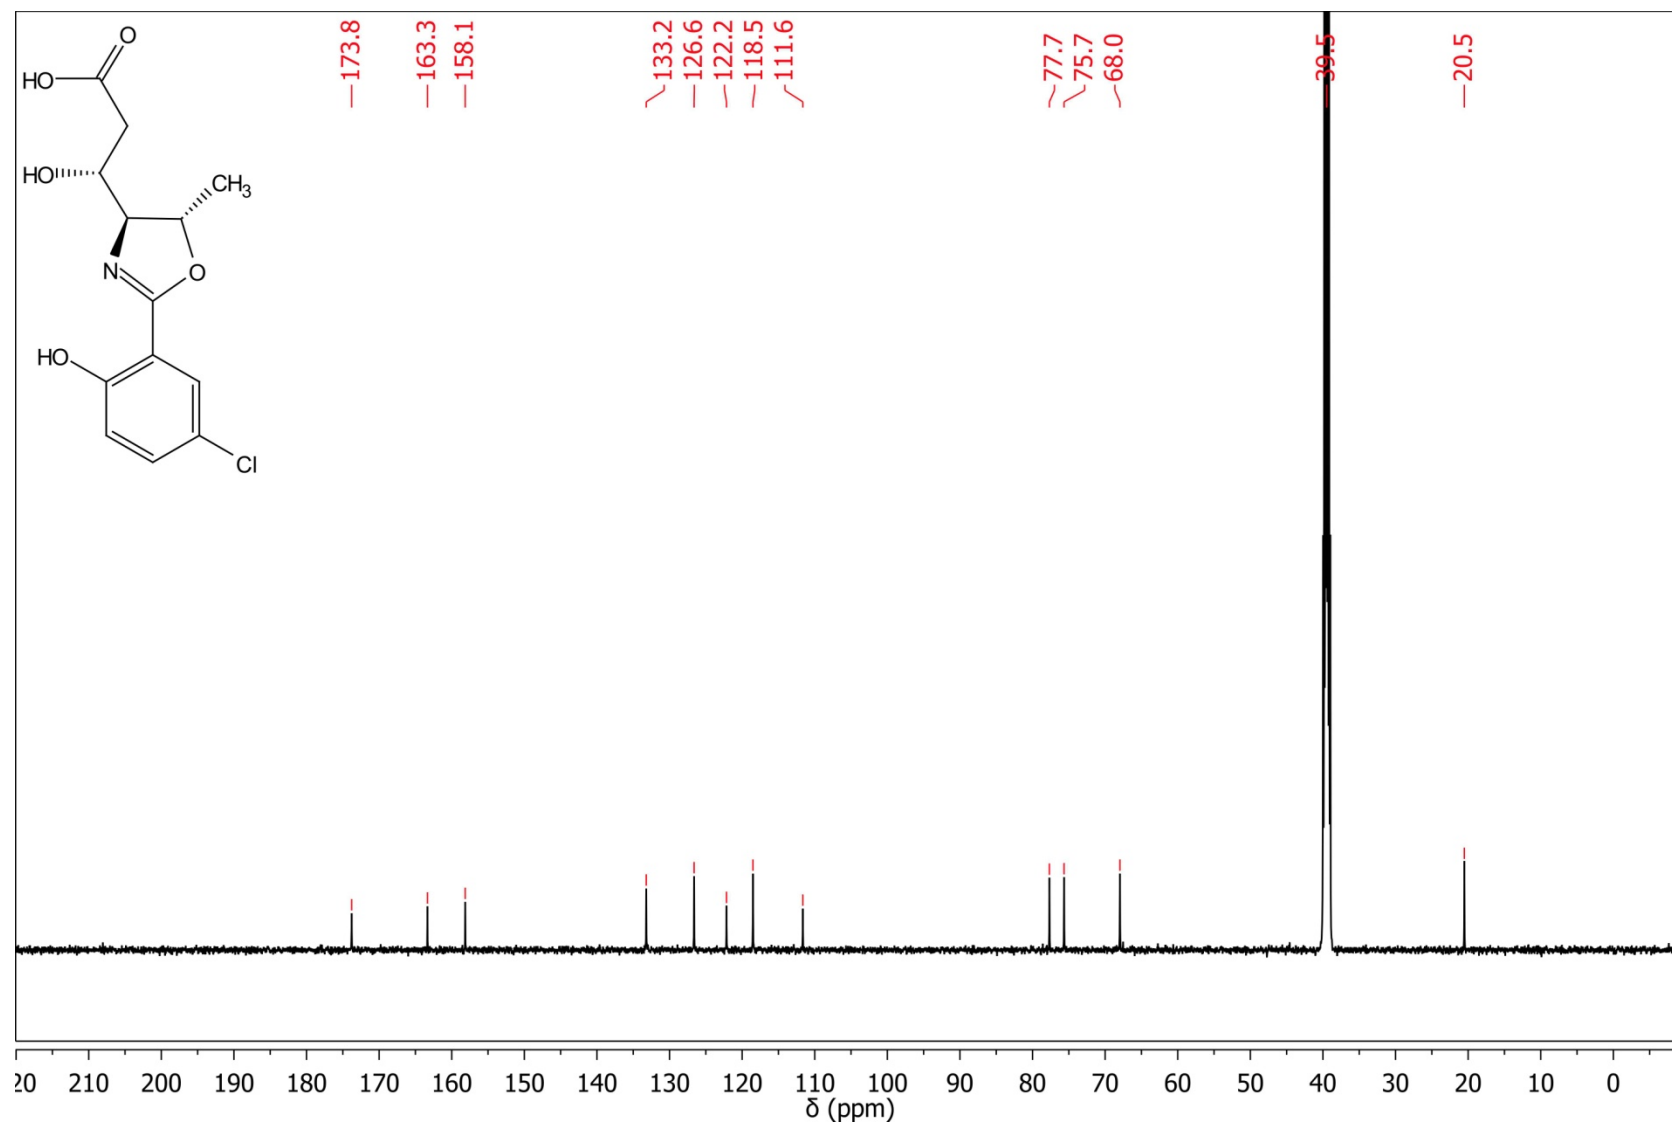

Figure S5. COSY Spectrum of Compound 1 in CD<sub>3</sub>OD (500 MHz)

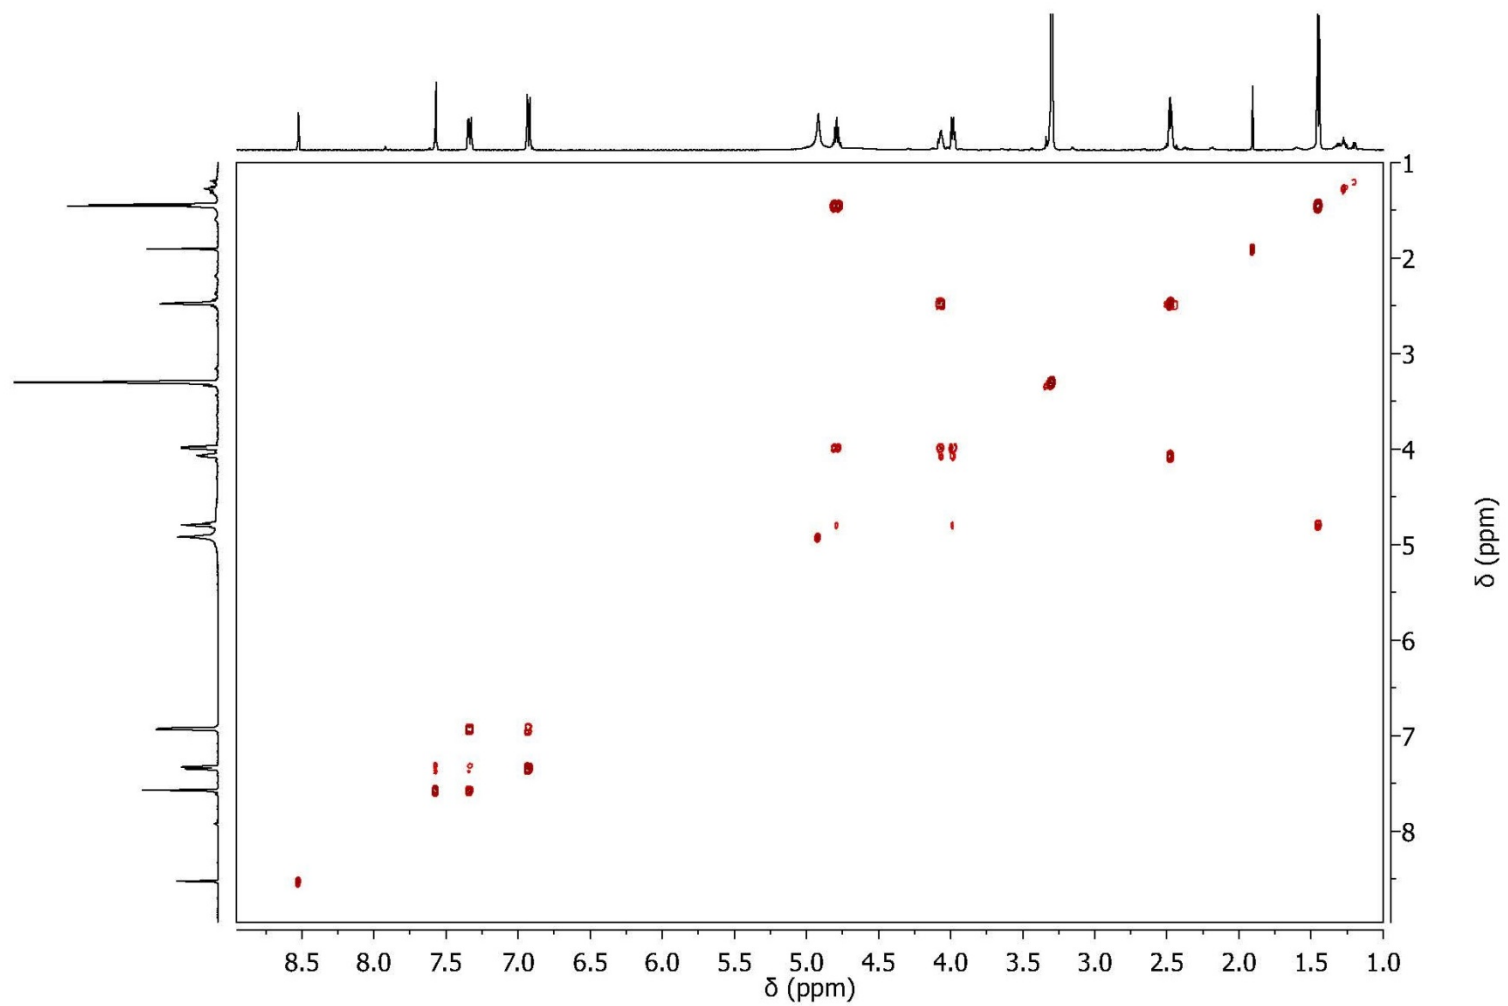

Figure S6. COSY Spectrum of Compound 1 in DMSO- $d_6$  (500 MHz)

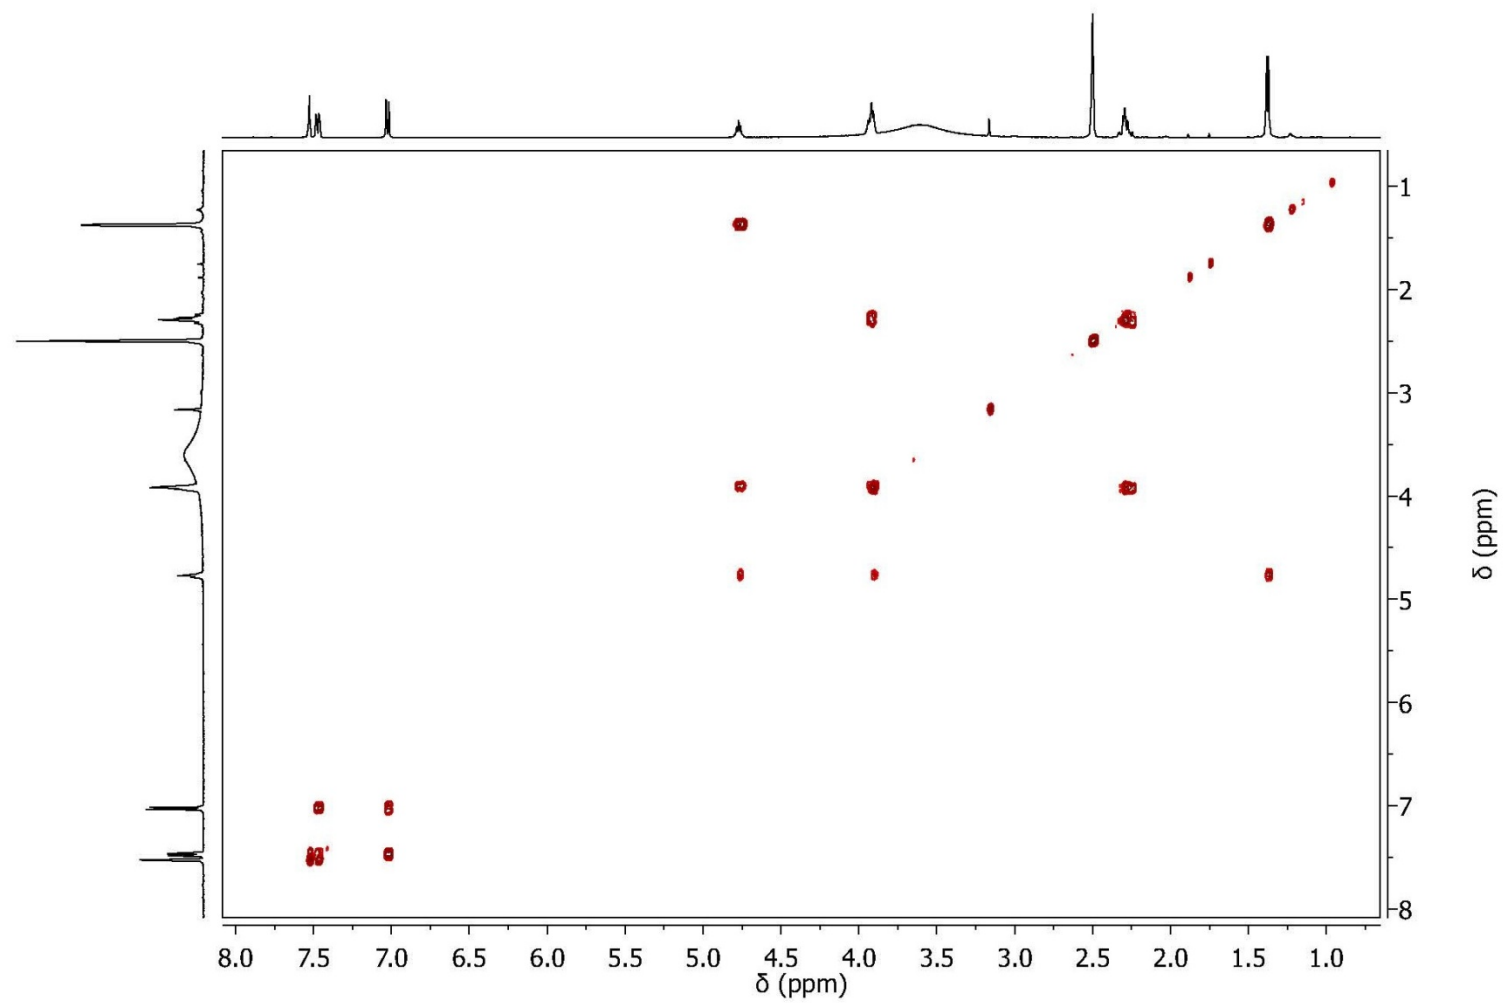

Figure S7. HSQC Spectrum of Compound 1 in CD<sub>3</sub>OD (500 MHz)

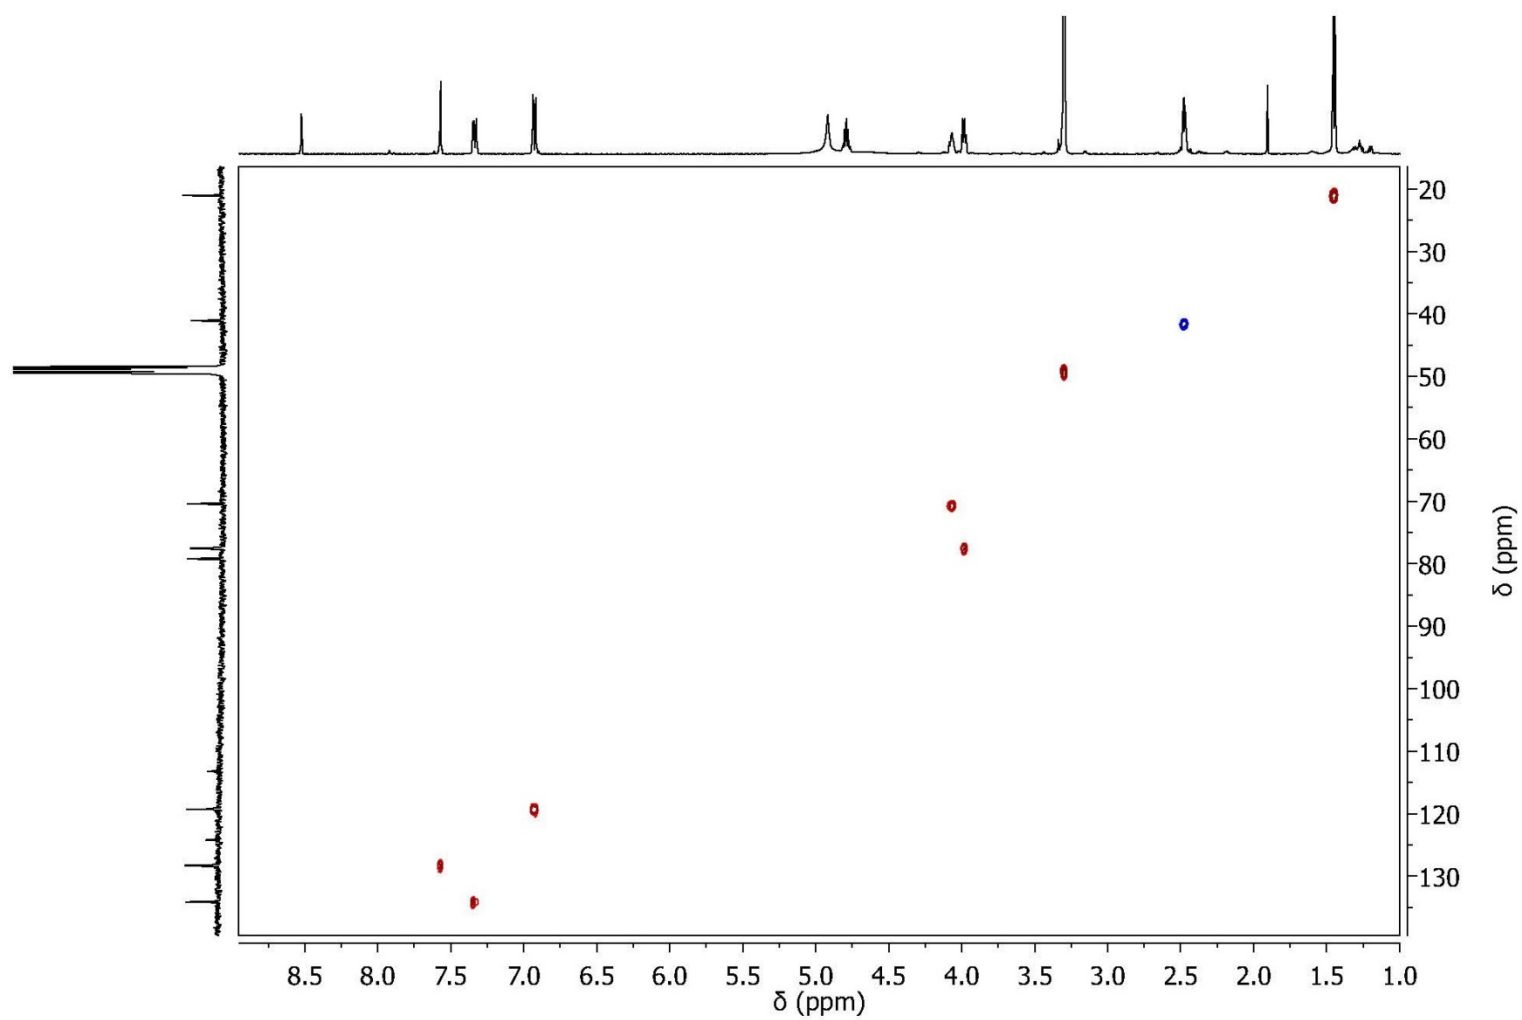

Figure S8. HSQC Spectrum of Compound 1 in DMSO- $d_6$  (500 MHz)

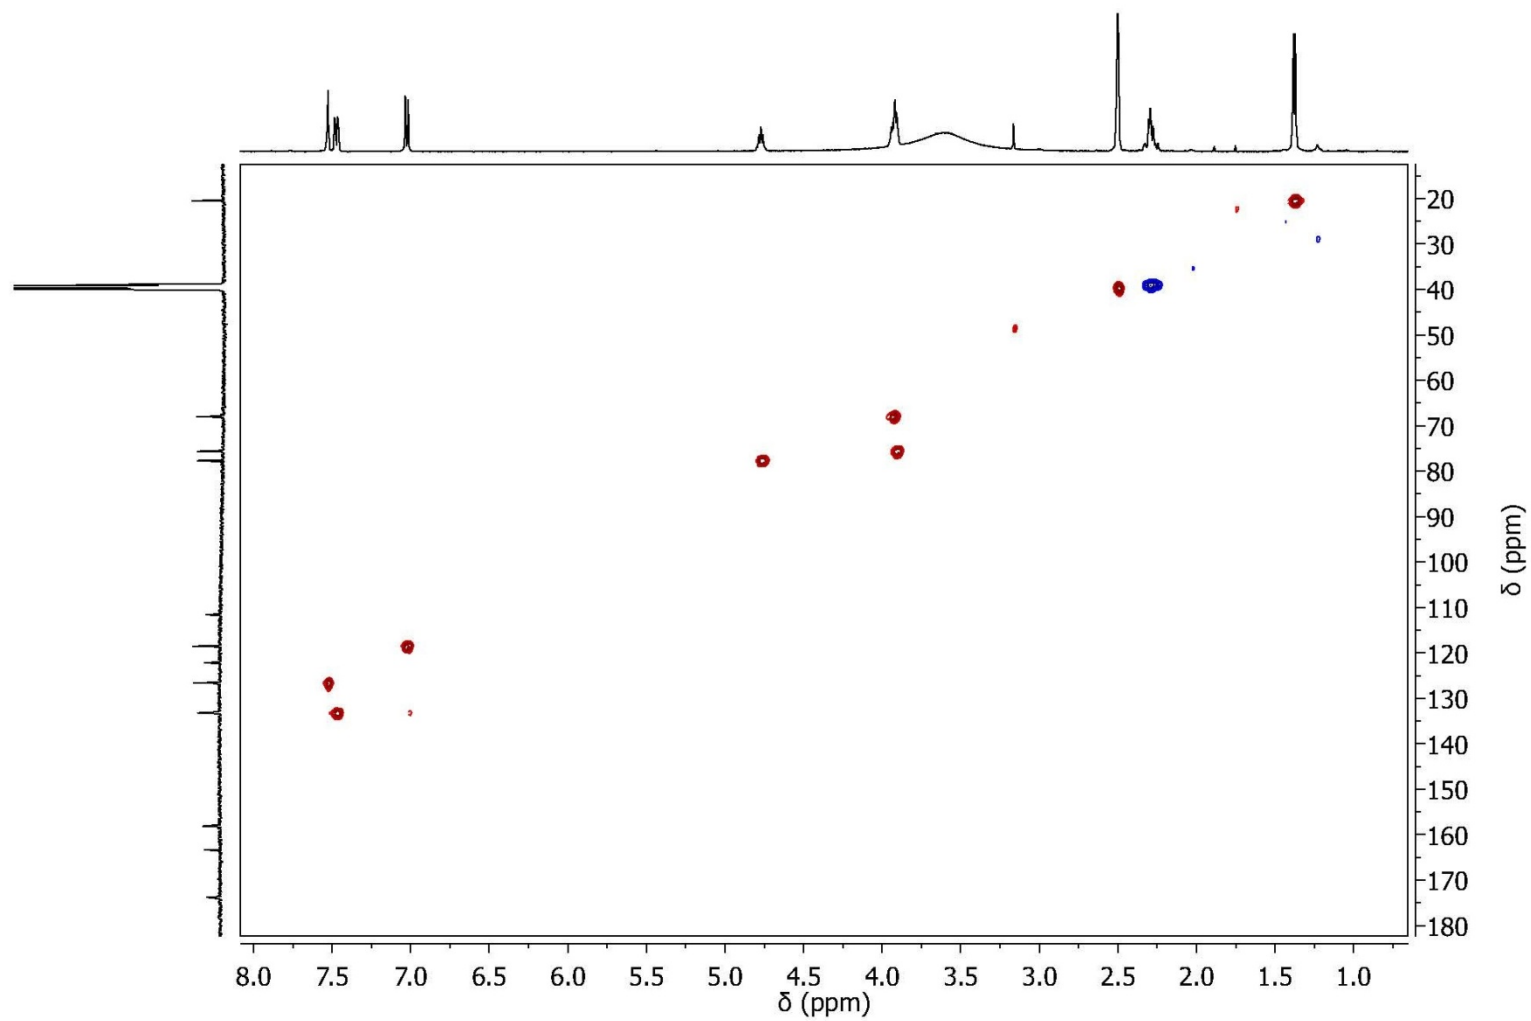

Figure S9. HMBC Spectrum of Compound 1 in CD<sub>3</sub>OD (500 MHz)

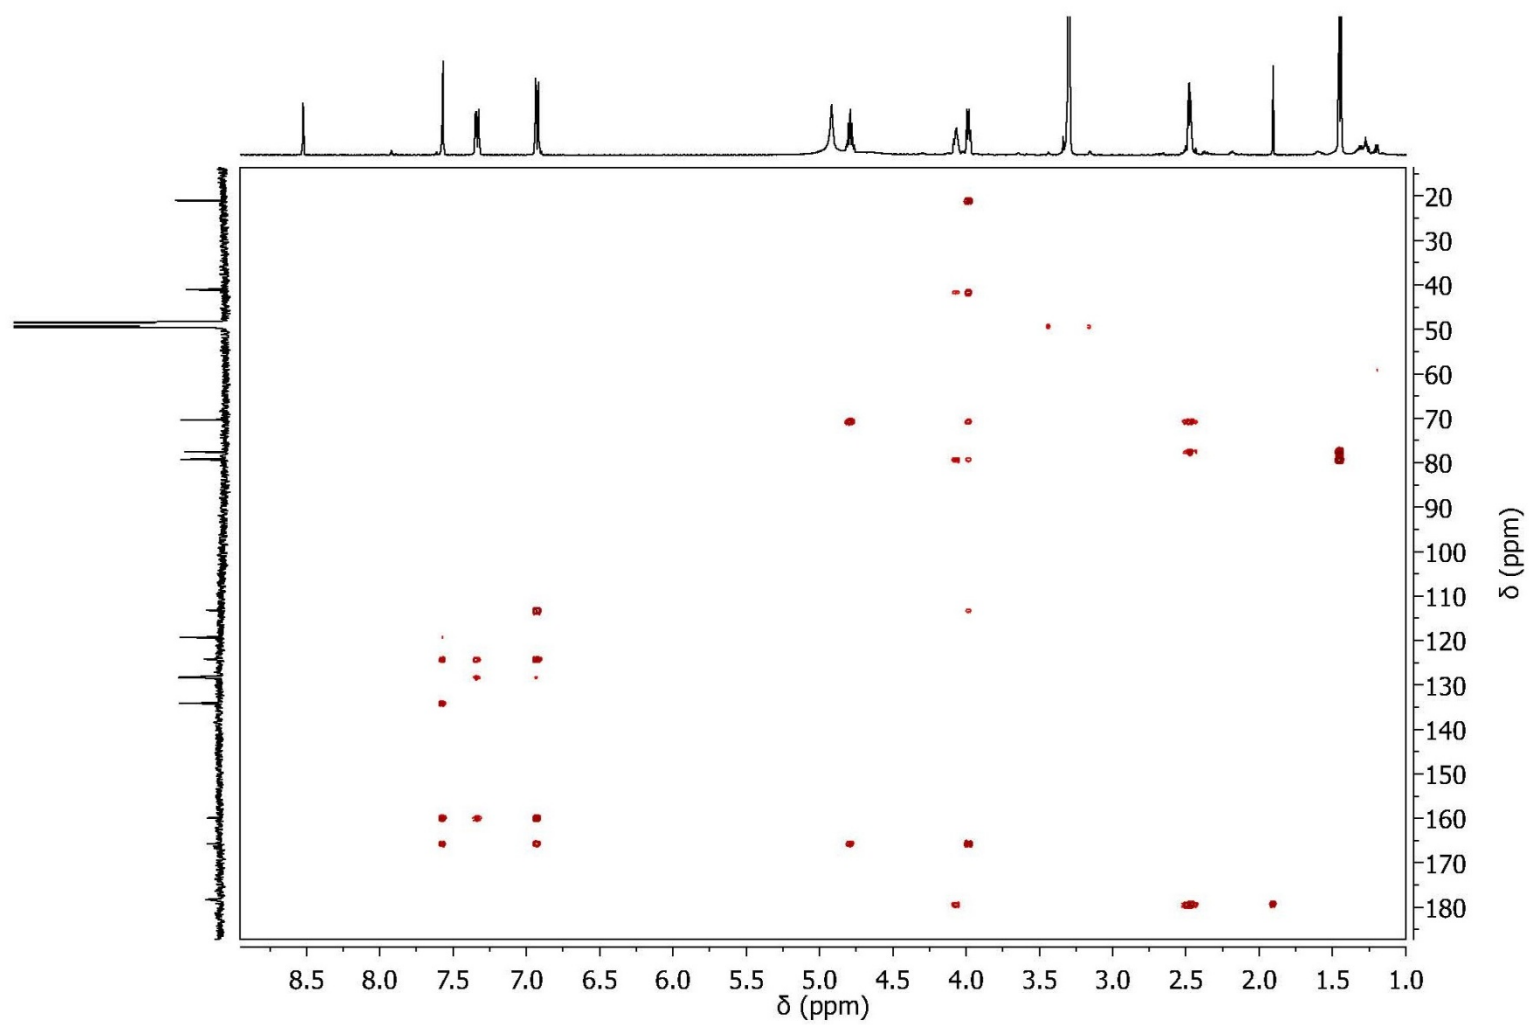



Figure S10. HMBC Spectrum of Compound 1 in DMSO- $d_6$  (500 MHz)

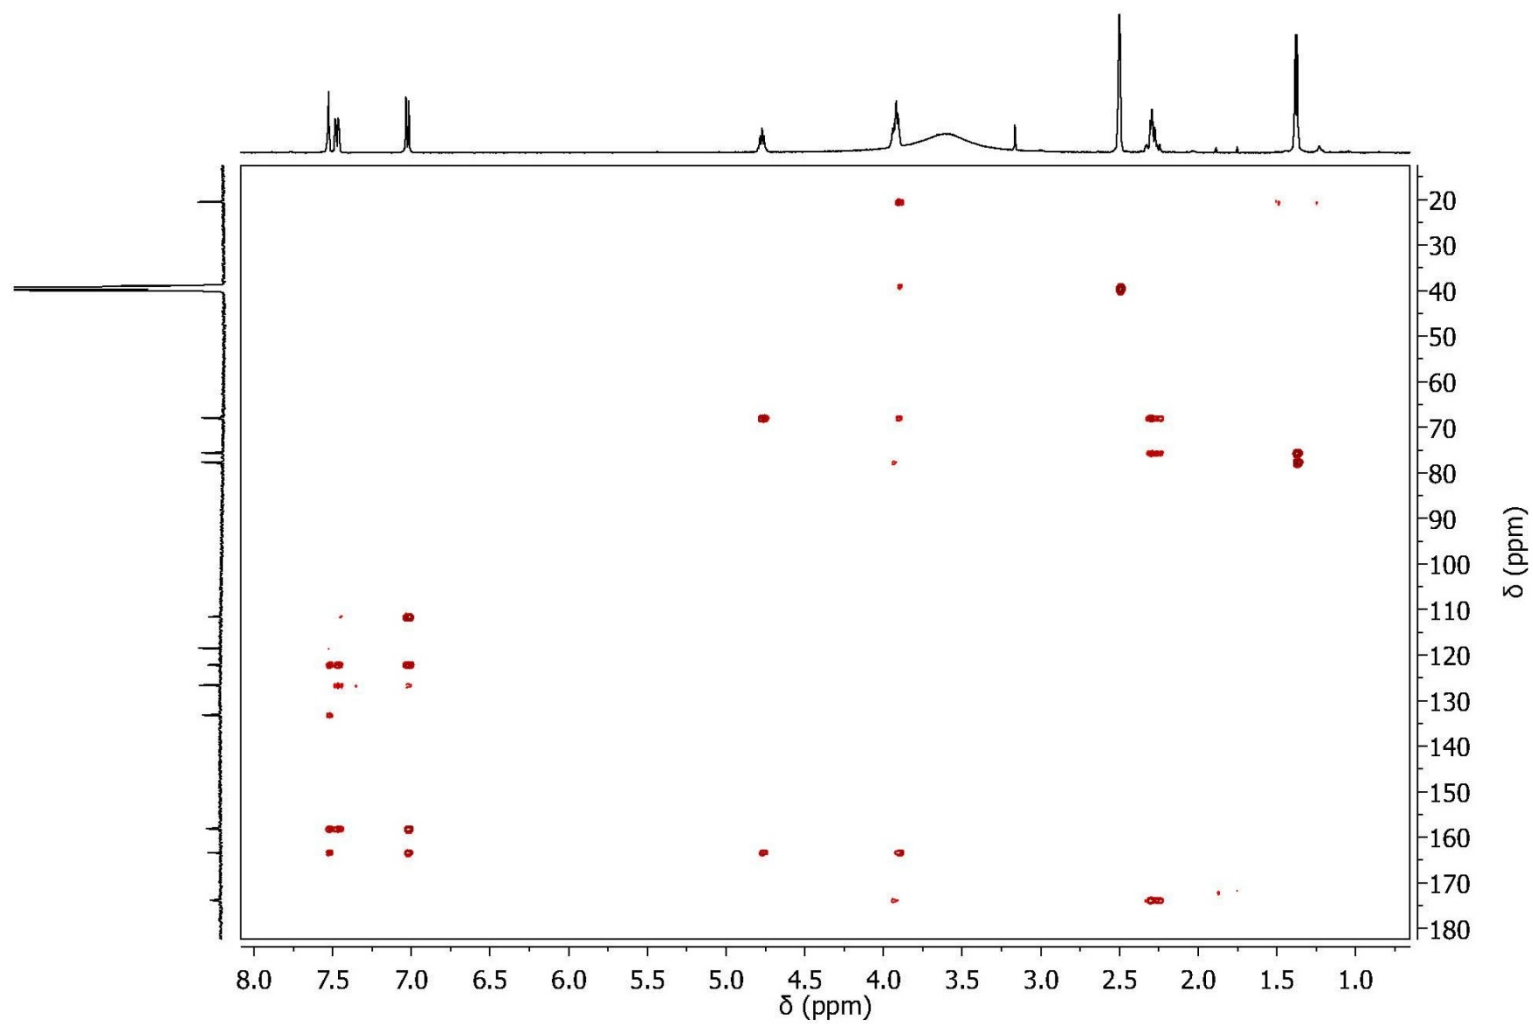

Figure S11.  $^{15}\text{N}$  HMBC Spectrum of Compound 1 in  $\text{DMSO-}d_6$  (500 MHz)

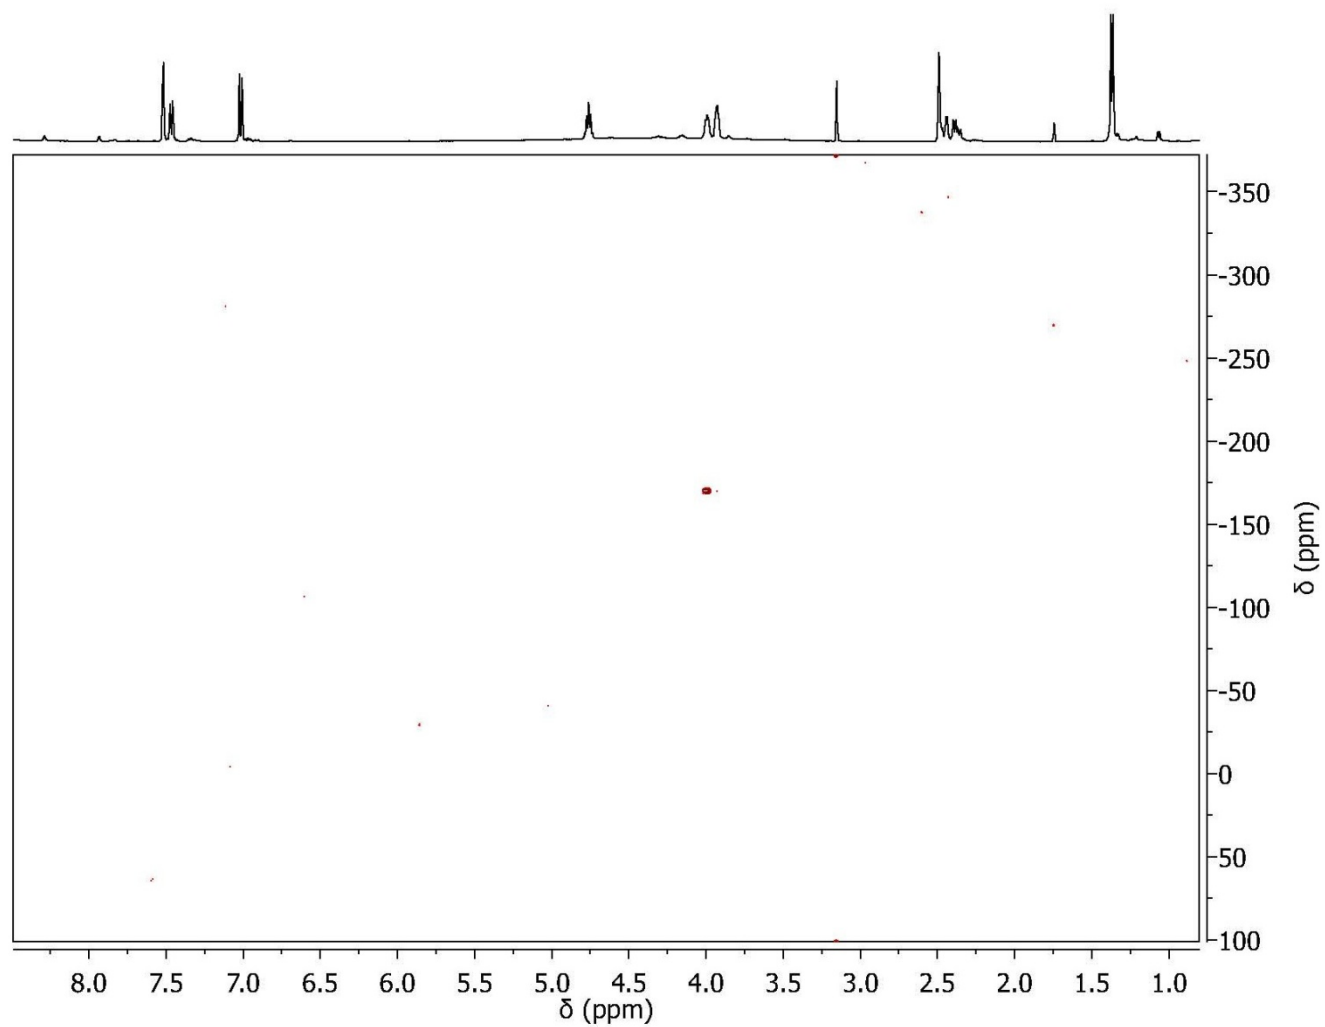

Figure S12. CIGAR Spectrum of Compound 1 in CD<sub>3</sub>OD (500 MHz)

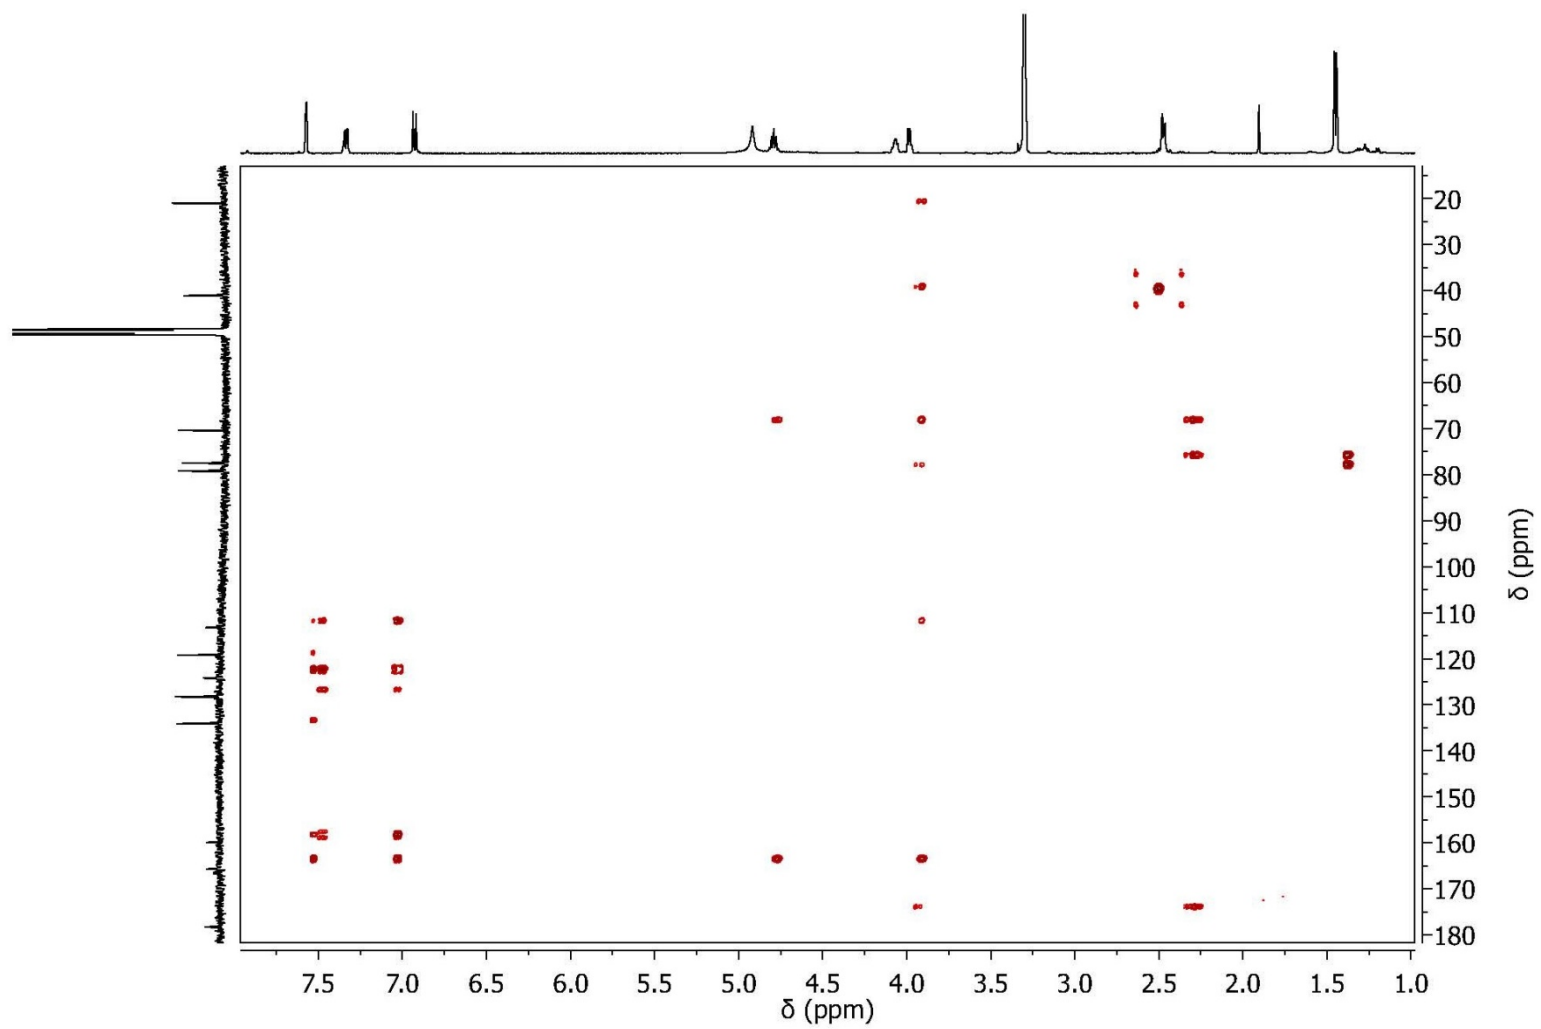

Figure S13. IR Spectrum of Compound 1 (CaF<sub>2</sub> disc)

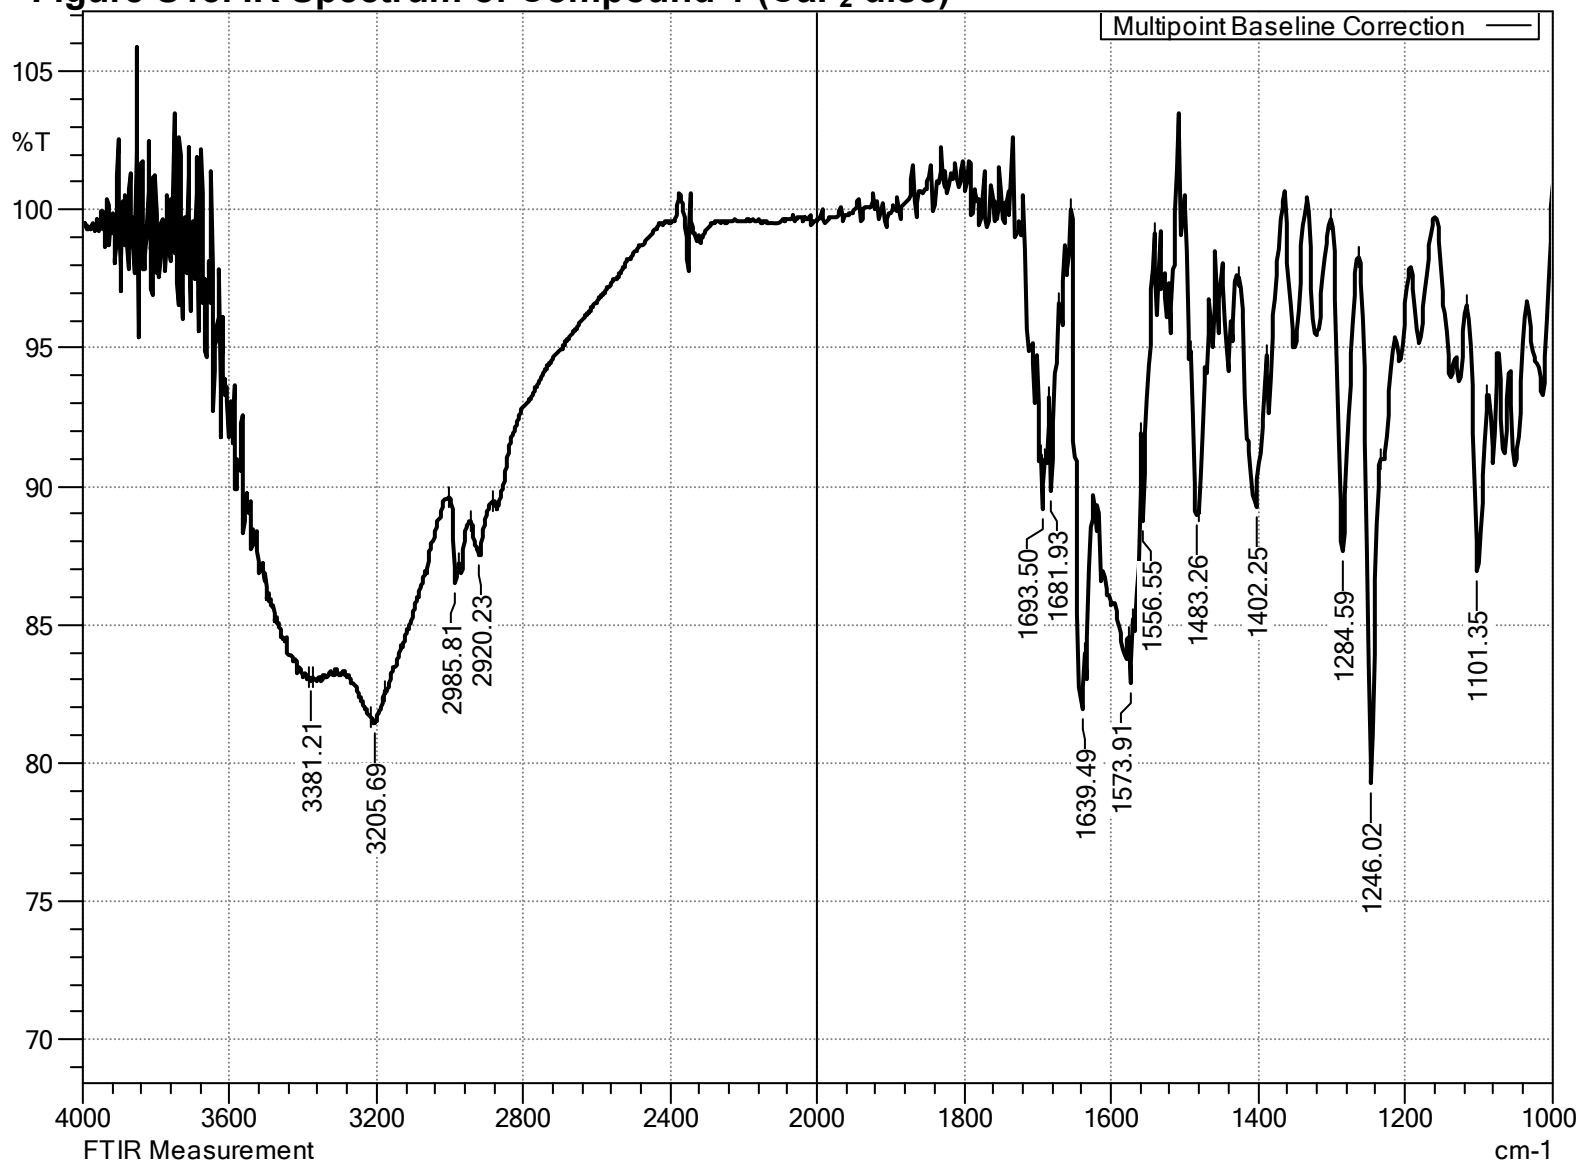

**Figure S14. UV-Vis Spectrum of Compound 1 in CH<sub>3</sub>OH**

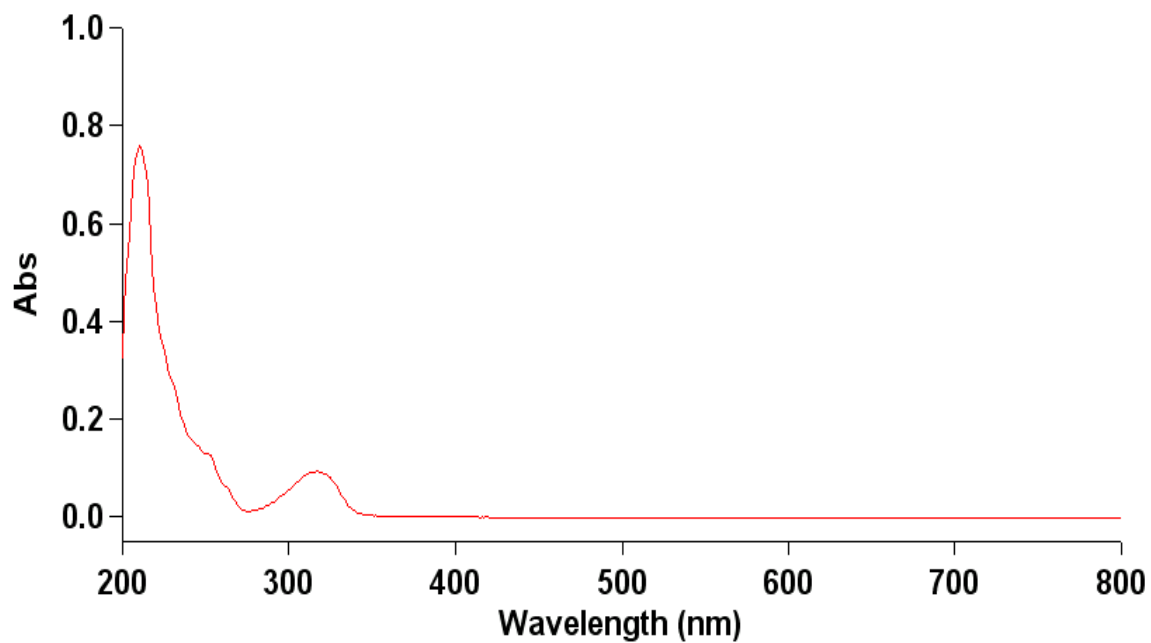

Range 799.9nm to 199.9nm

Conc: 10 µg/mL, which equals  $3.337 \times 10^{-5}$  mol/L

MW: 299.71 g/mol

$\epsilon = A / (c \cdot l)$ , where c is in mol/L and l is in cm

| Wavelength (nm) | Abs   | molar absorptivity ( $\epsilon$ ) | log $\epsilon$ |
|-----------------|-------|-----------------------------------|----------------|
| 317.0           | 0.093 | 2787                              | 3.45           |
| 210.0           | 0.758 | 22718                             | 4.36           |
| 251.1           | 0.128 | 3836                              | 3.58           |
| 263.0           | 0.059 | 1768                              | 3.25           |

Figure S15. <sup>1</sup>H NMR Spectrum of Compound 2 in CD<sub>3</sub>OD (500 MHz)

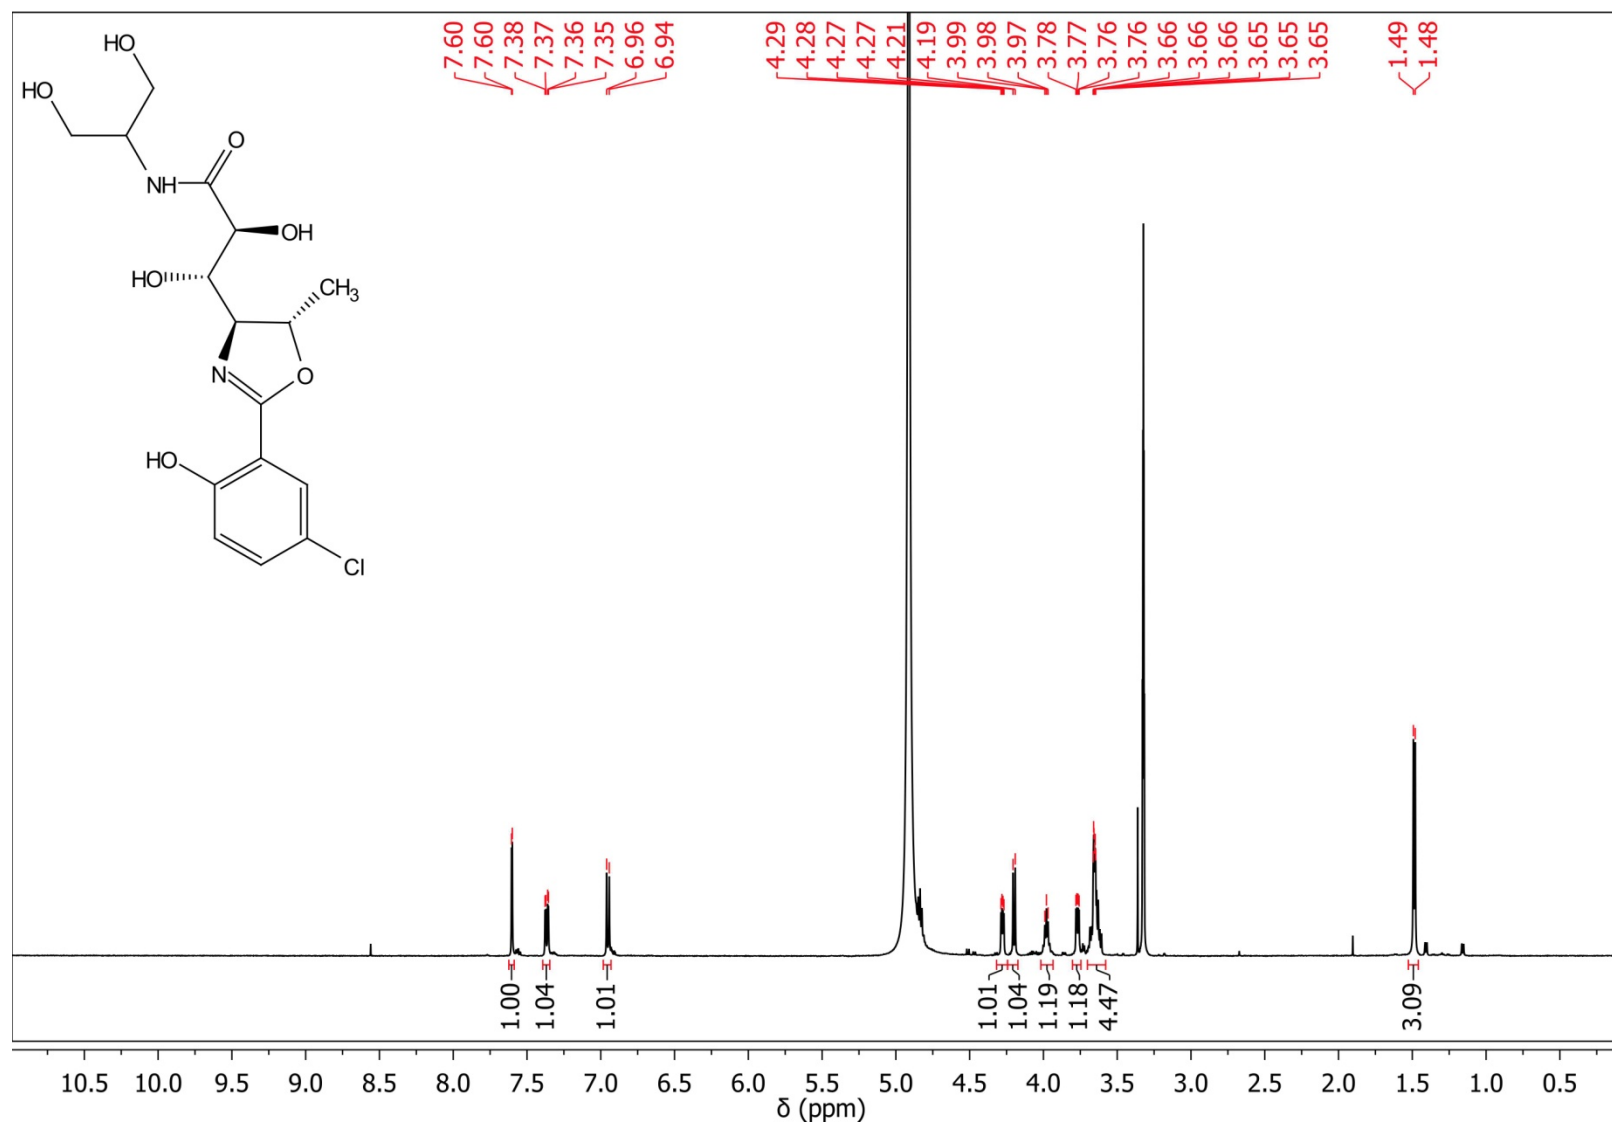

Figure S16.  $^{13}\text{C}$  NMR Spectrum of Compound 2 in  $\text{CD}_3\text{OD}$  (125 MHz)

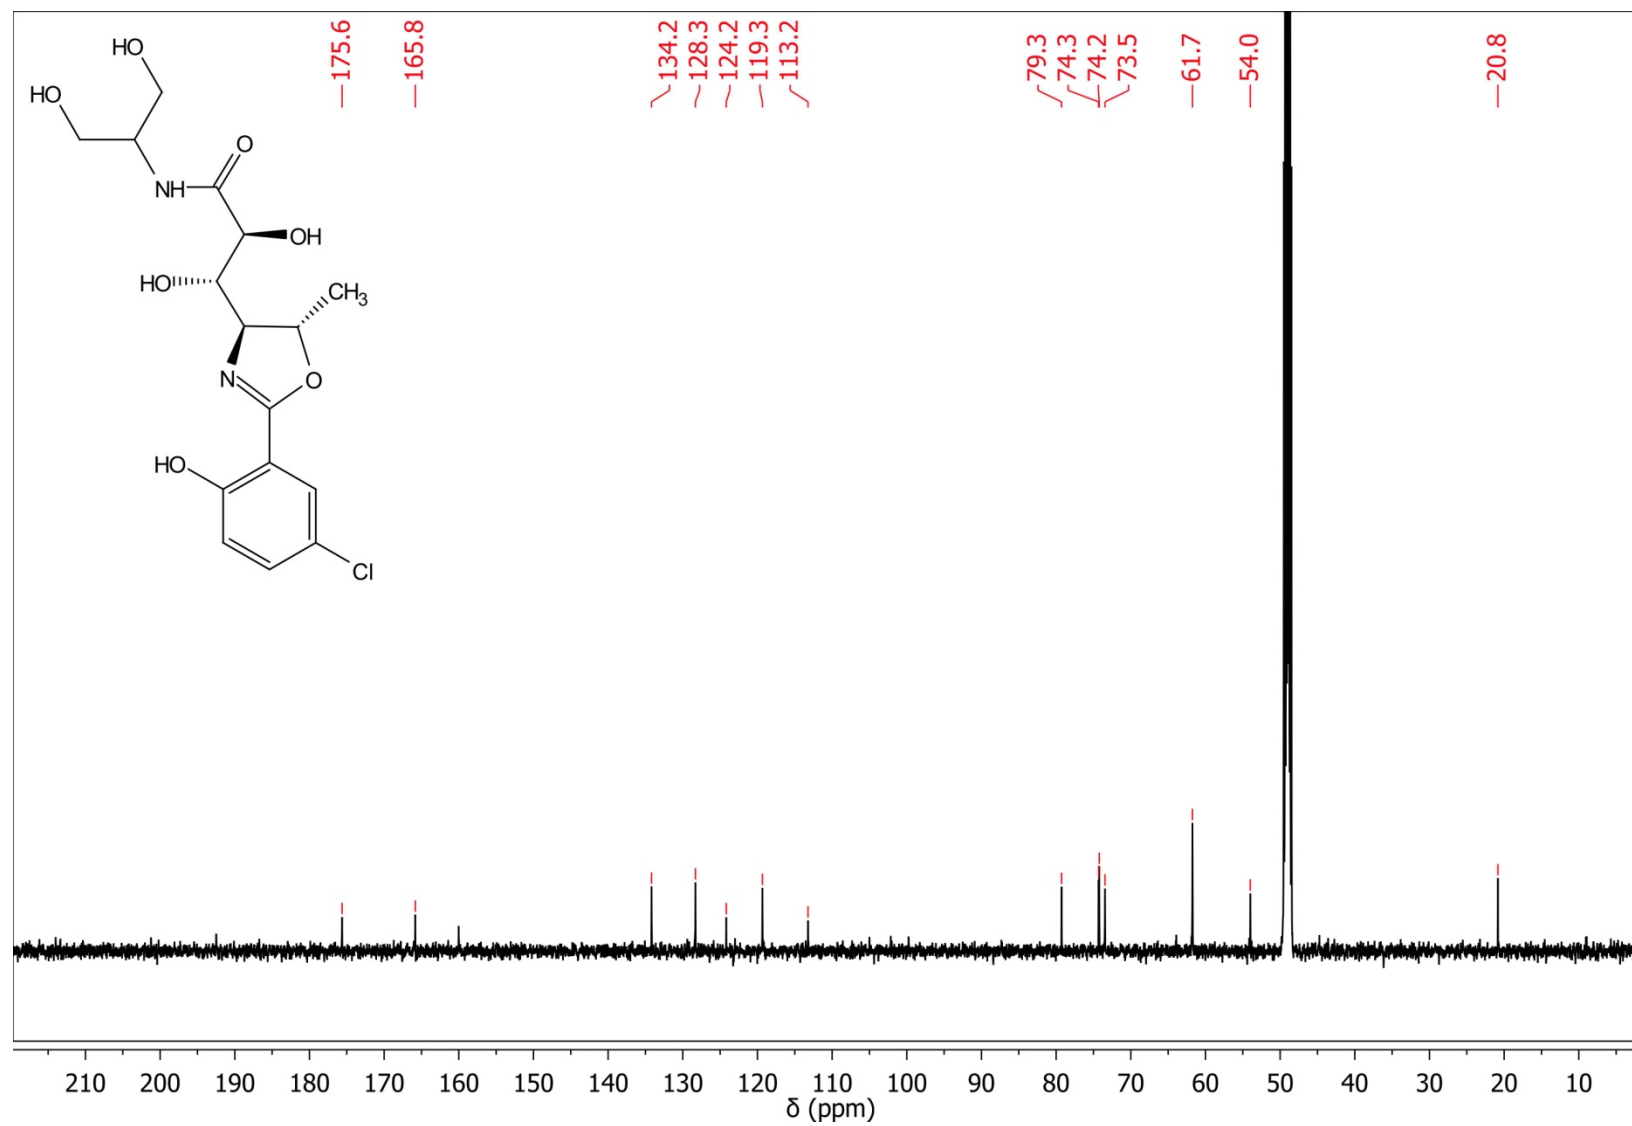

Figure S17. COSY Spectrum of Compound 2 in CD<sub>3</sub>OD (500 MHz)

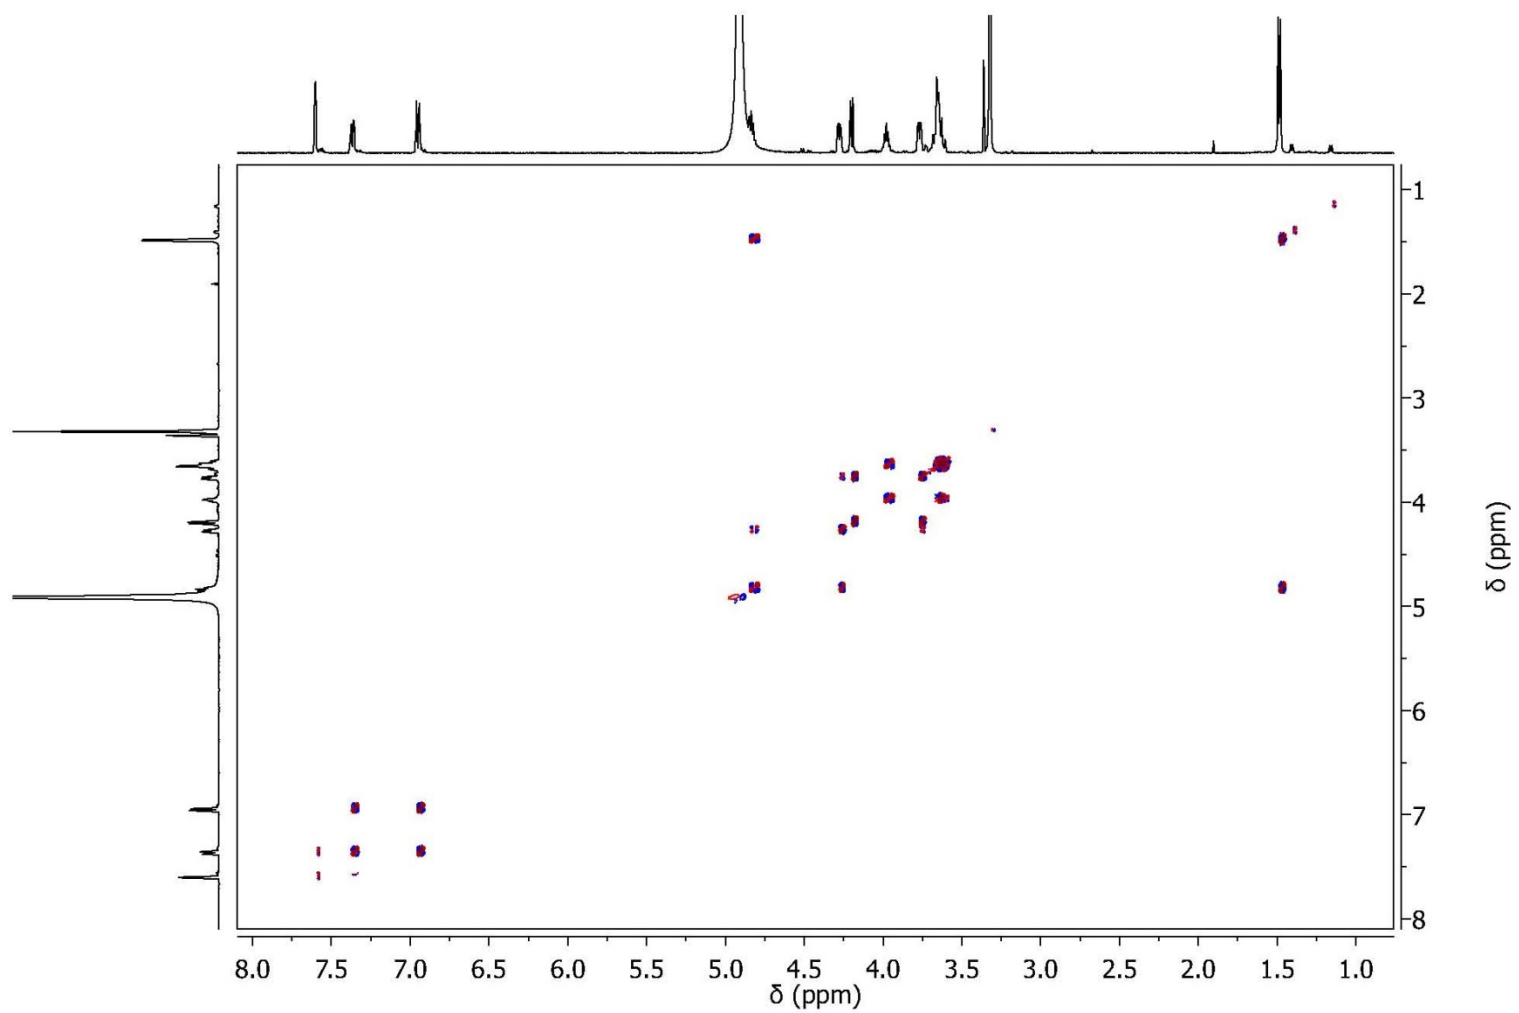



Figure S18. HSQC Spectrum of Compound 2 in CD<sub>3</sub>OD (500 MHz)

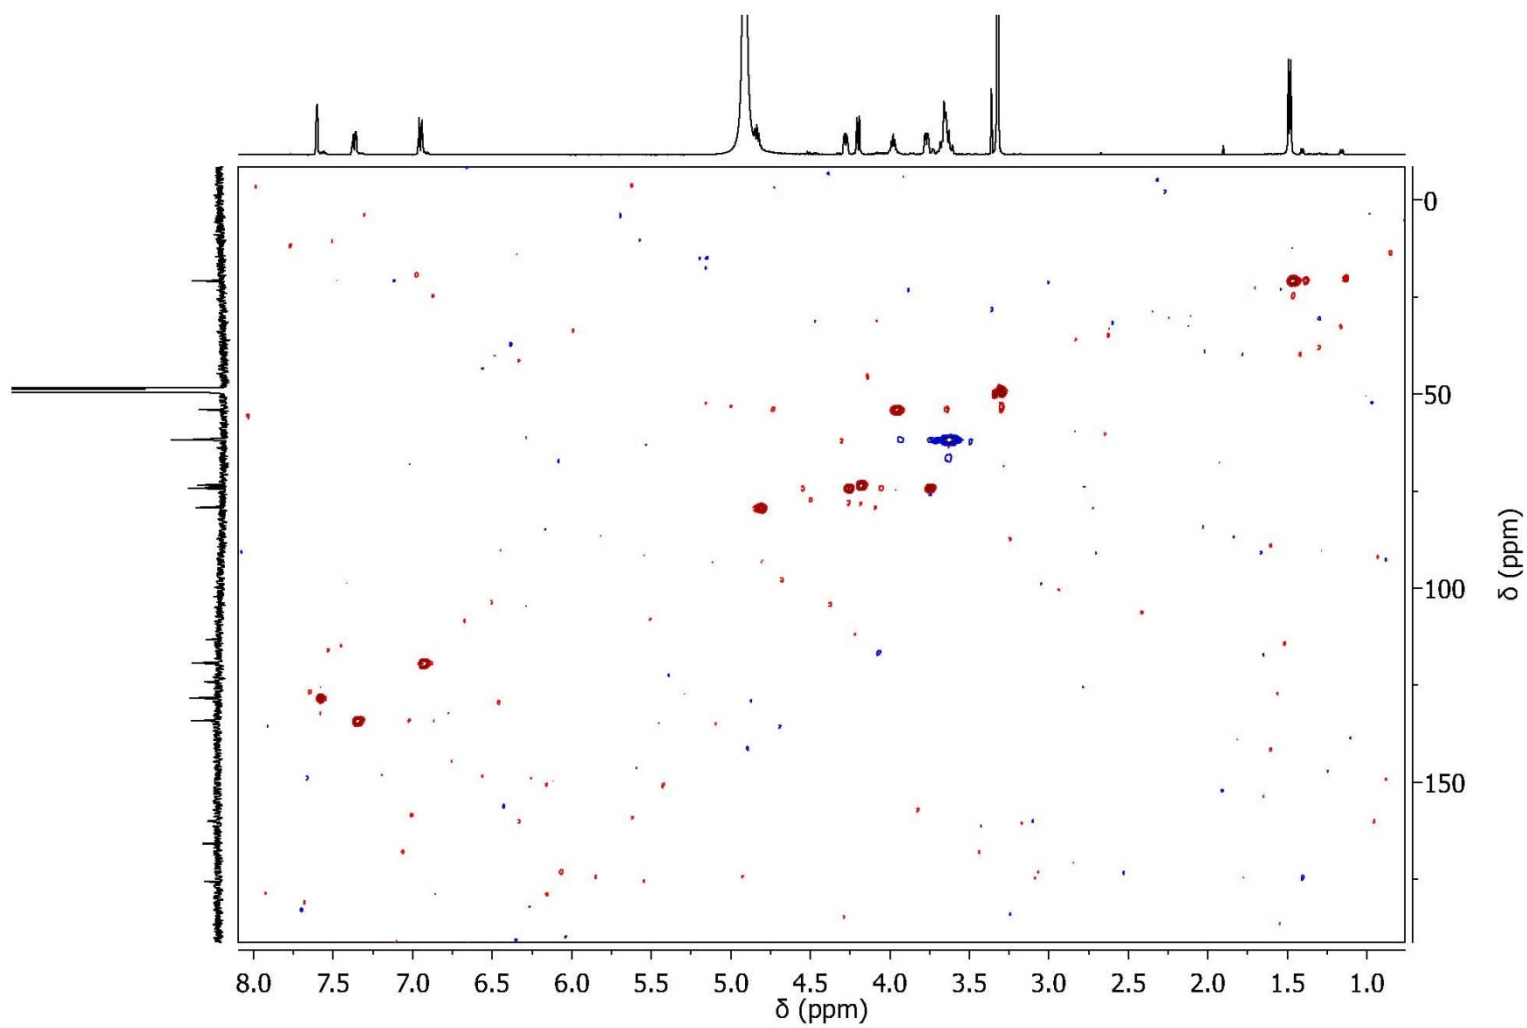

Figure S19. HMBC Spectrum of Compound 2 in CD<sub>3</sub>OD (500 MHz)

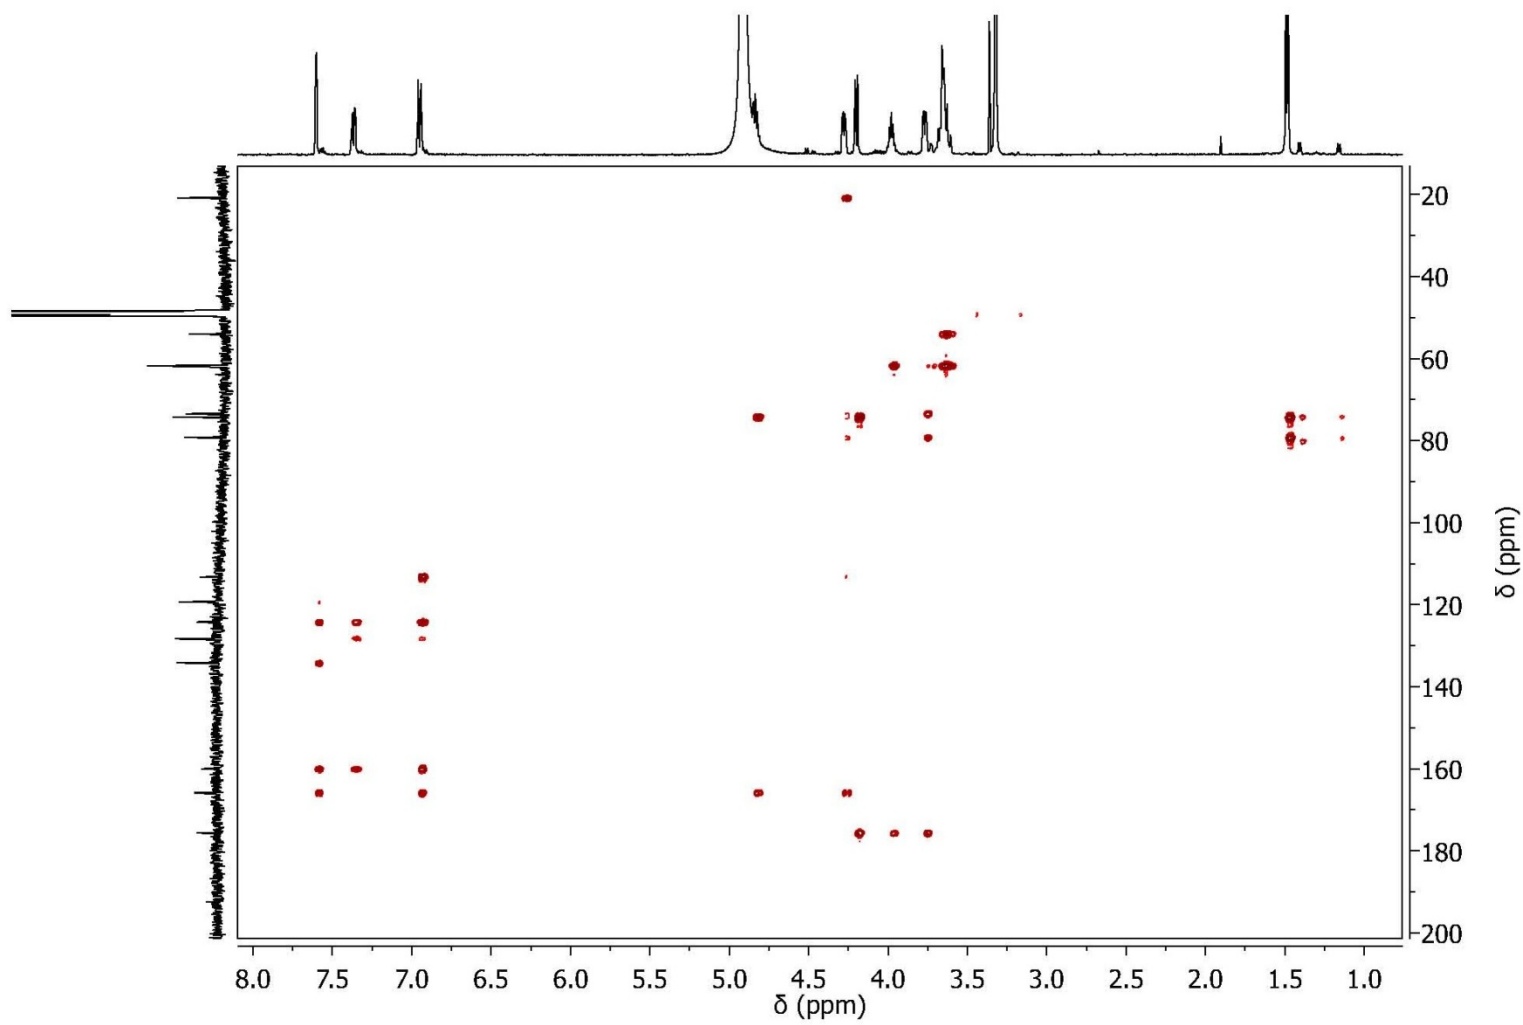

Figure S20.  $^{15}\text{N}$  HMBC Spectrum of Compound 2 in  $\text{CD}_3\text{OD}$  (500 MHz)

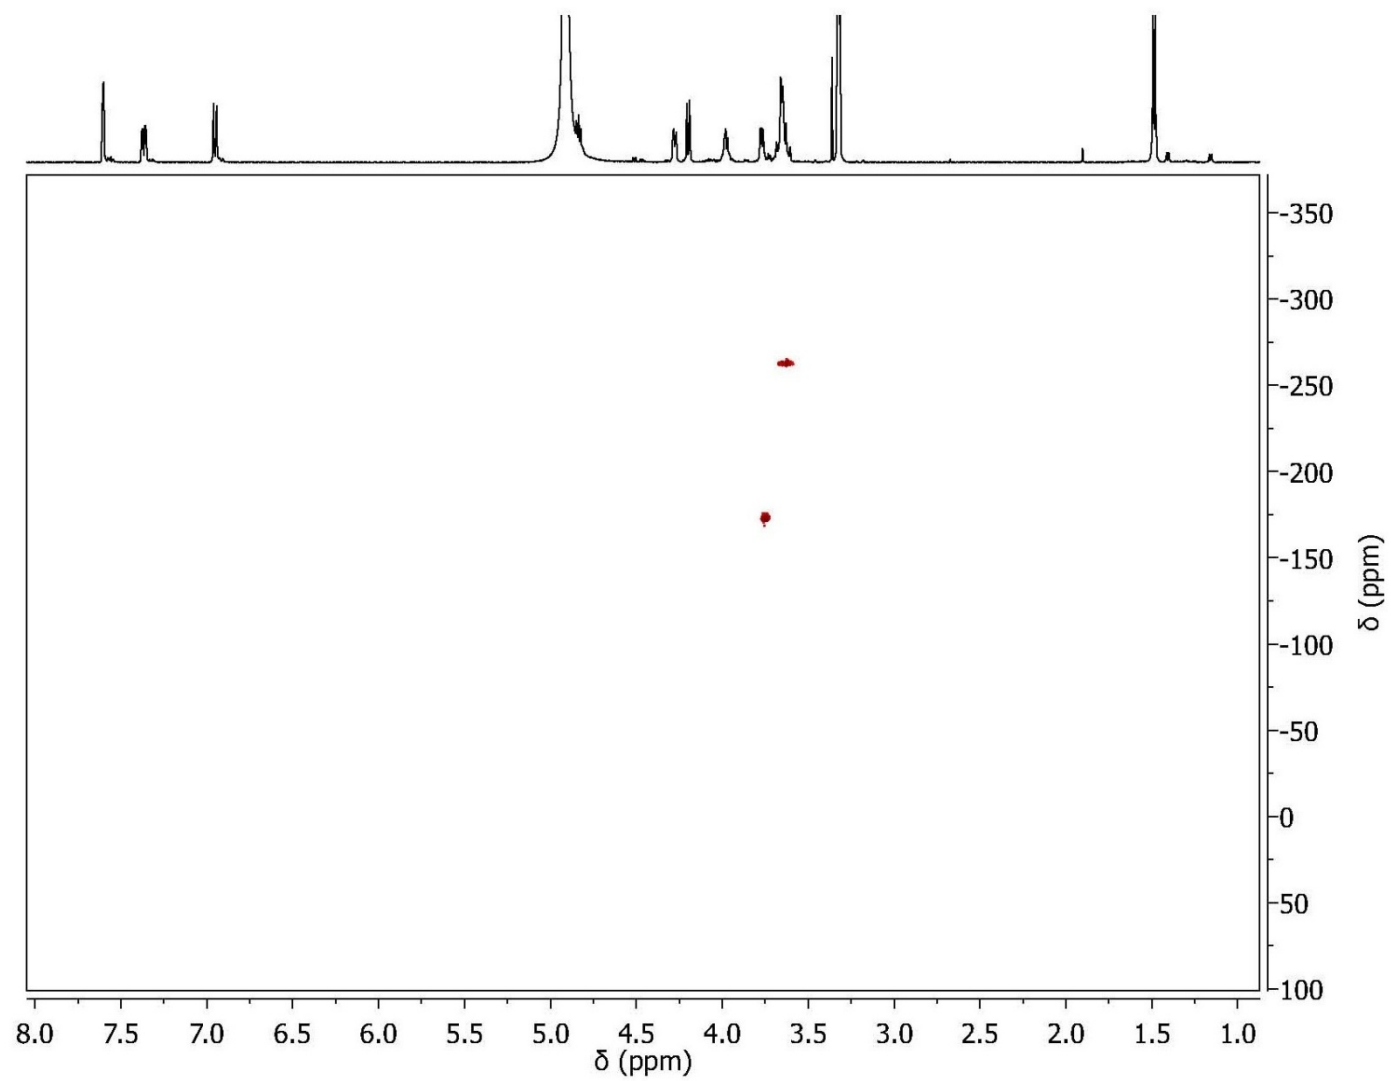

Figure S21. ROESY Spectrum of Compound 2 in CD<sub>3</sub>OD (500 MHz)

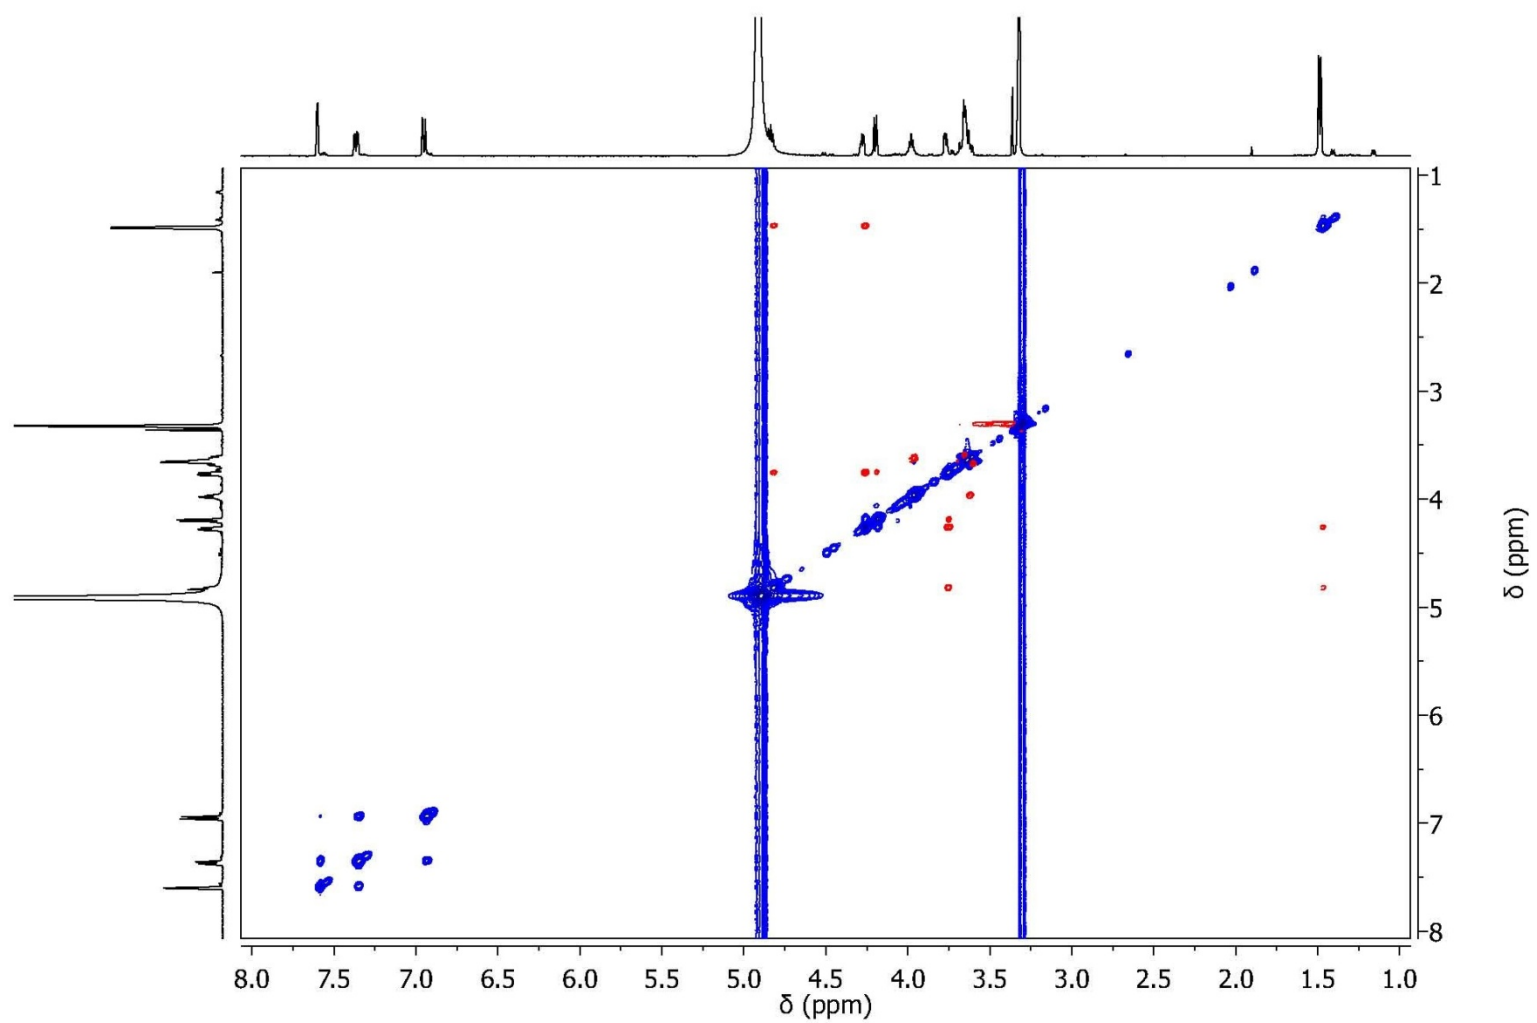

Figure S22. IR Spectrum of Compound 2 (CaF<sub>2</sub> disc)

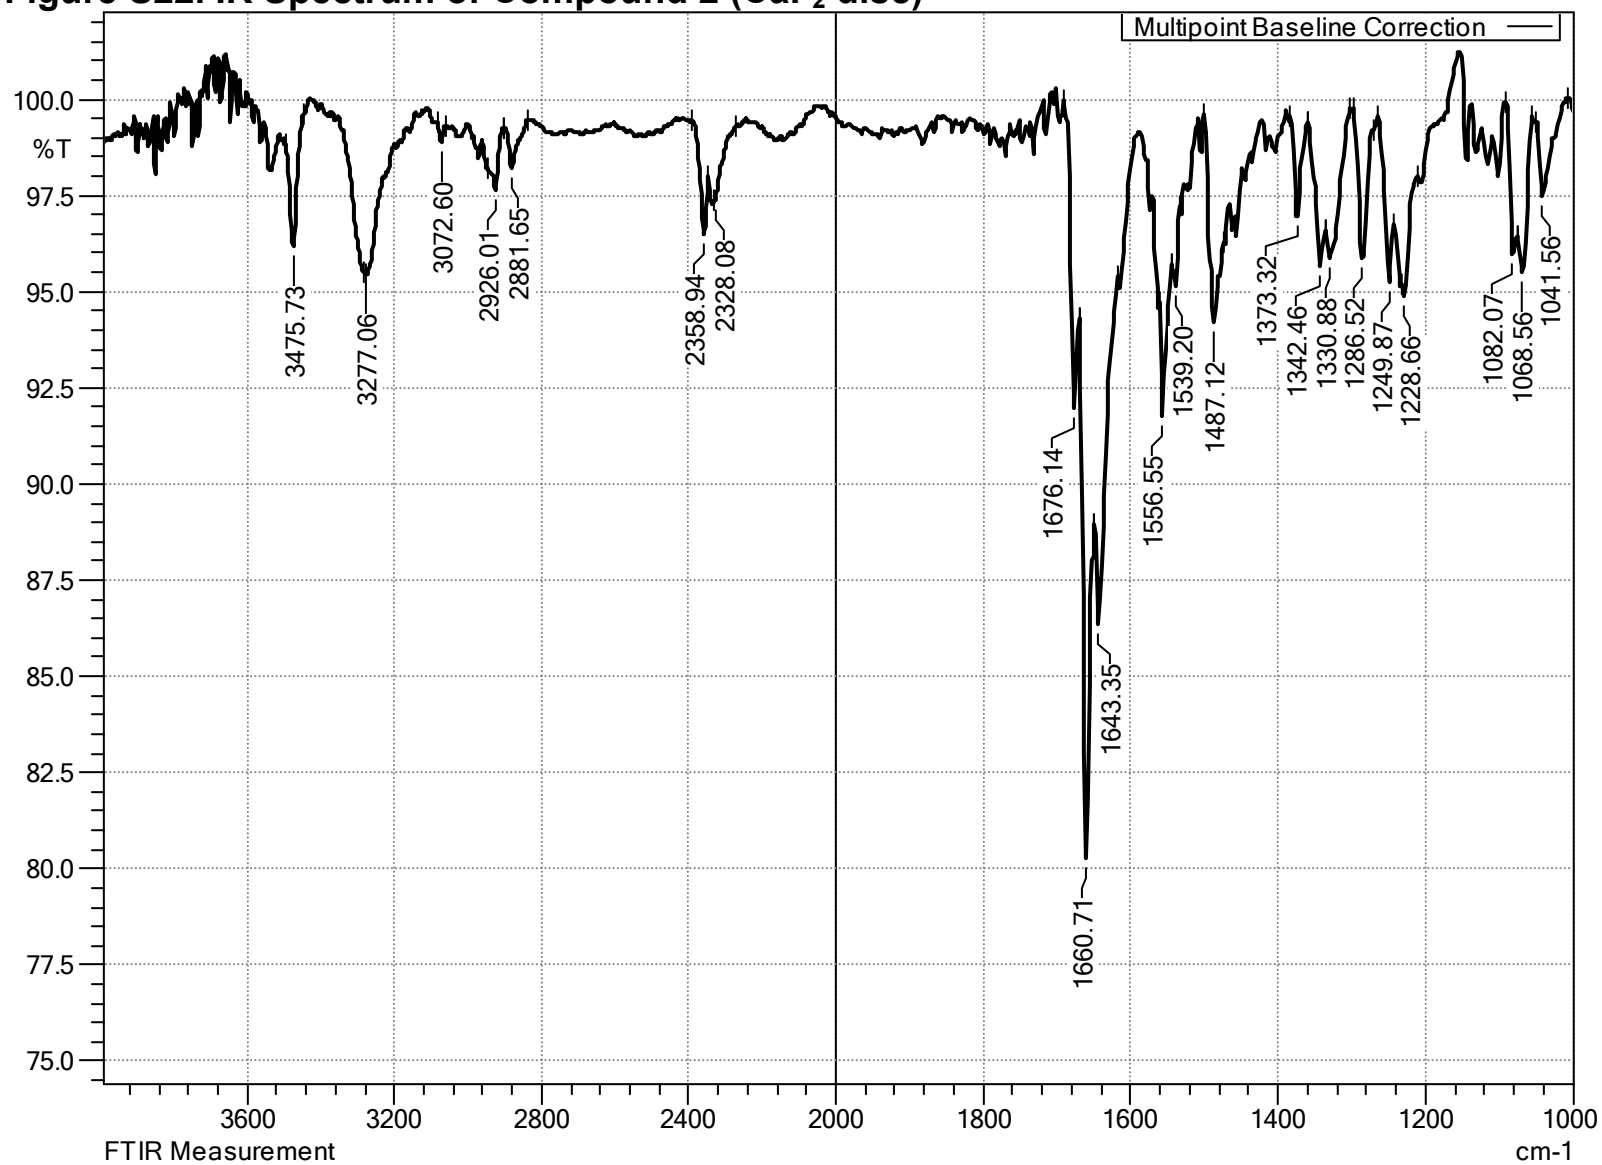

**Figure S23. UV-Vis Spectrum of Compound 2 in CH<sub>3</sub>OH**

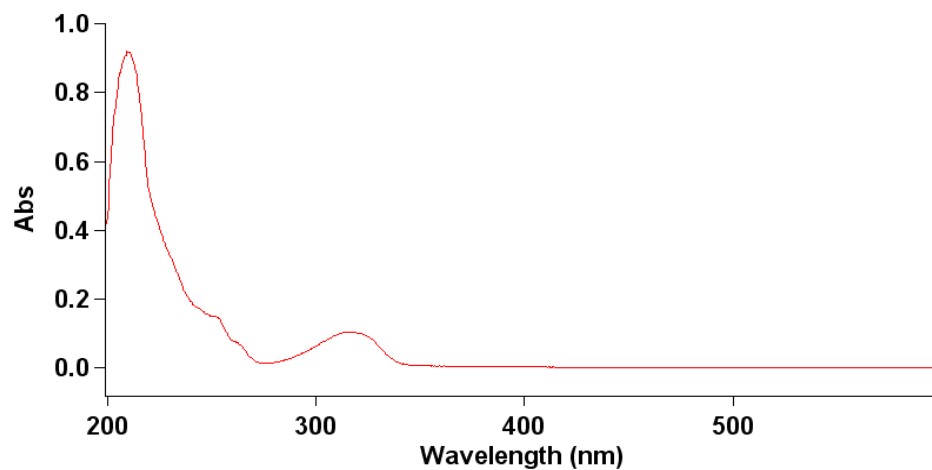

Peak Threshold 0.0100  
Range 799.9nm to 199.9nm

Conc: 10 µg/mL, which equals 2.572 x 10<sup>-5</sup> mol/L  
MW: 388.80 g/mol

Pathlength = 1 cm

$\epsilon = A / (c \cdot l)$ , where c is in mol/L and l is in cm

| Wavelength (nm) | Abs   | molar absorptivity ( $\epsilon$ ) | log $\epsilon$ |
|-----------------|-------|-----------------------------------|----------------|
| 314.9           | 0.103 | 4005                              | 3.60           |
| 209.5           | 0.921 | 35808                             | 4.55           |
| 251.0           | 0.150 | 5832                              | 3.77           |
| 261.5           | 0.075 | 2916                              | 3.46           |

Figure S24. <sup>1</sup>H NMR Spectrum of Compound 3 in CD<sub>3</sub>OD (500 MHz)

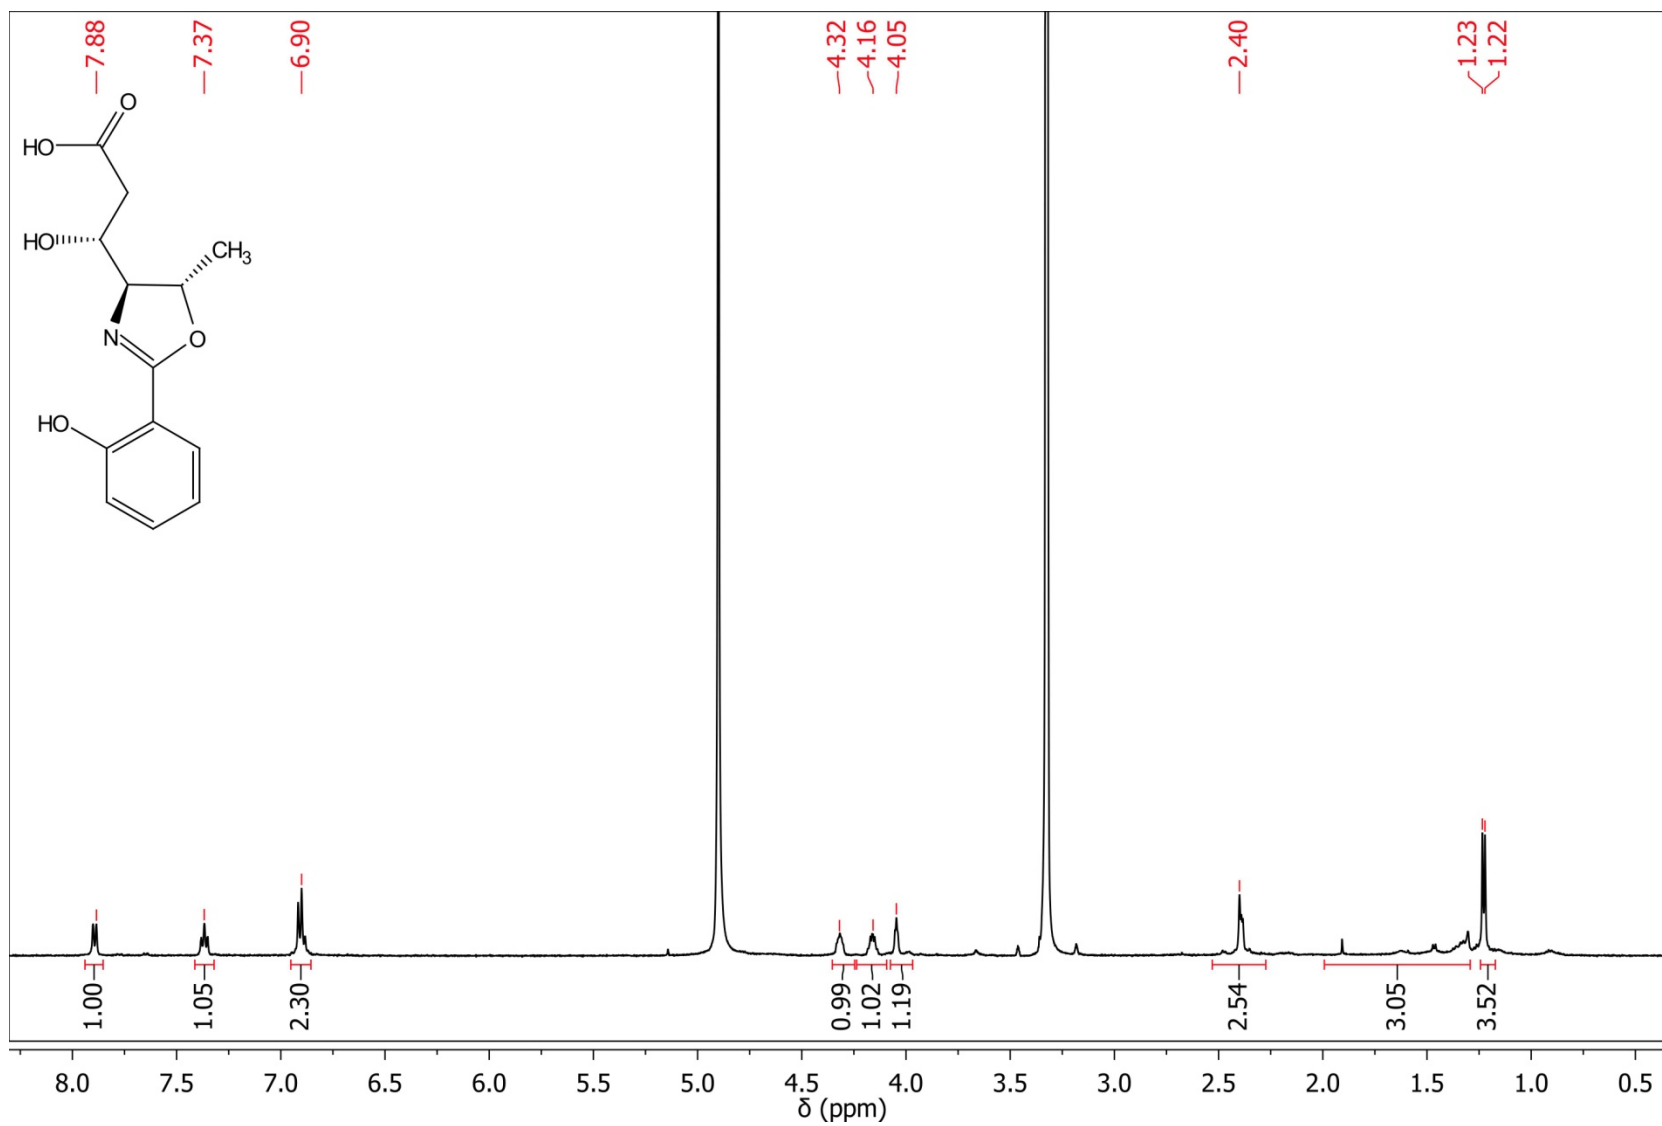

Figure S25. <sup>1</sup>H NMR Spectrum of Compound 4 in CD<sub>3</sub>OD (500 MHz)

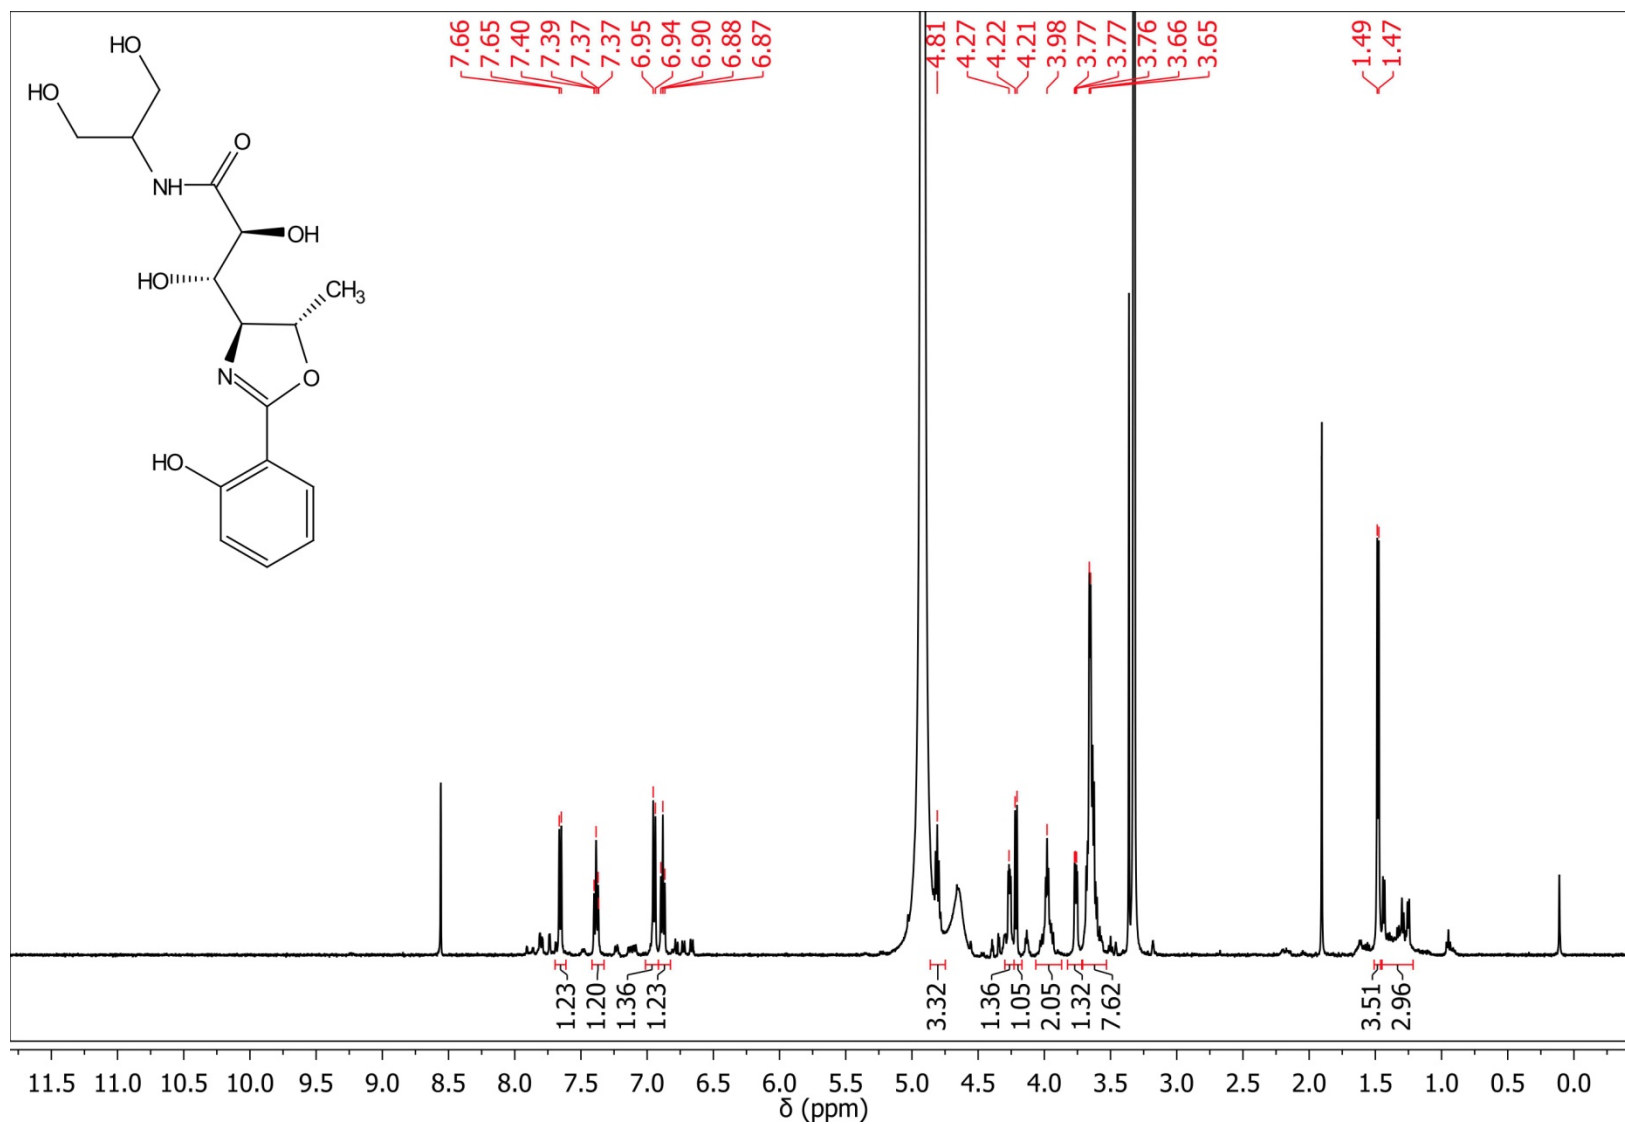



Figure S26.  $^1\text{H}$  NMR Spectrum of Compound 5 in  $\text{CD}_3\text{OD}$  (500 MHz)

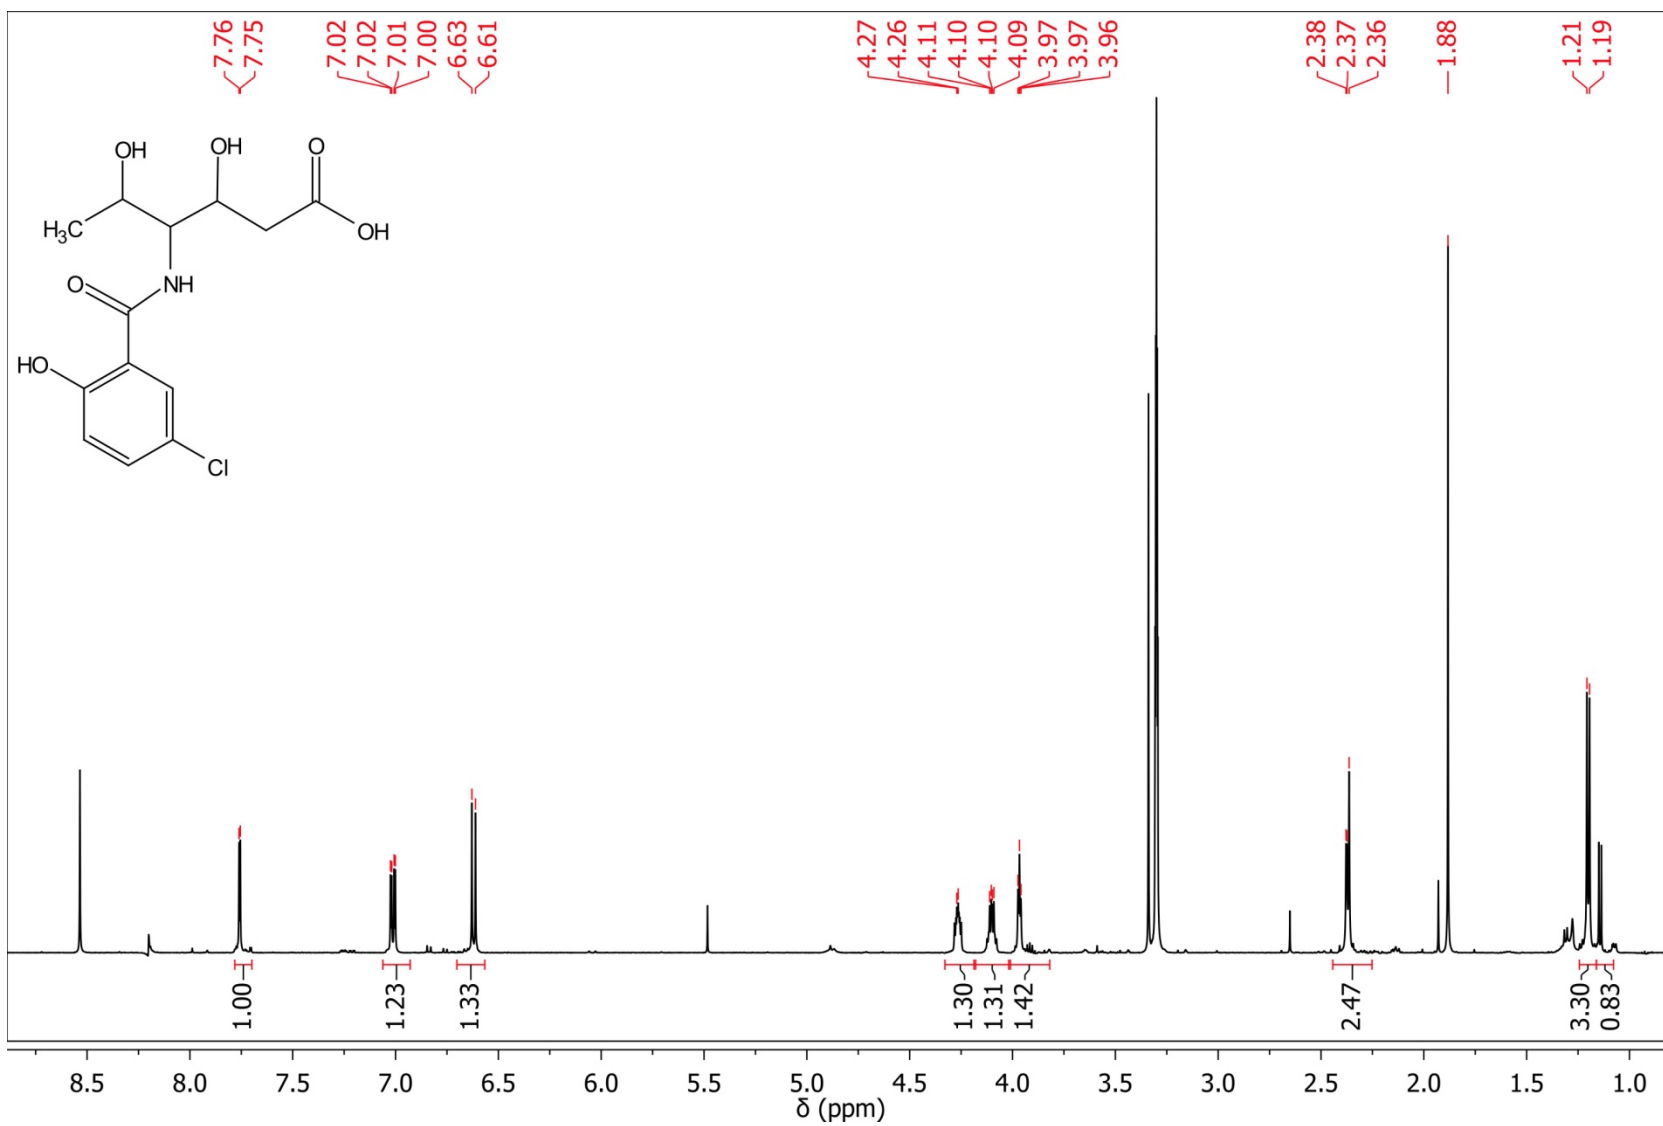

Figure S27.  $^{13}\text{C}$  NMR Spectrum of Compound 5 in  $\text{CD}_3\text{OD}$  (125 MHz)

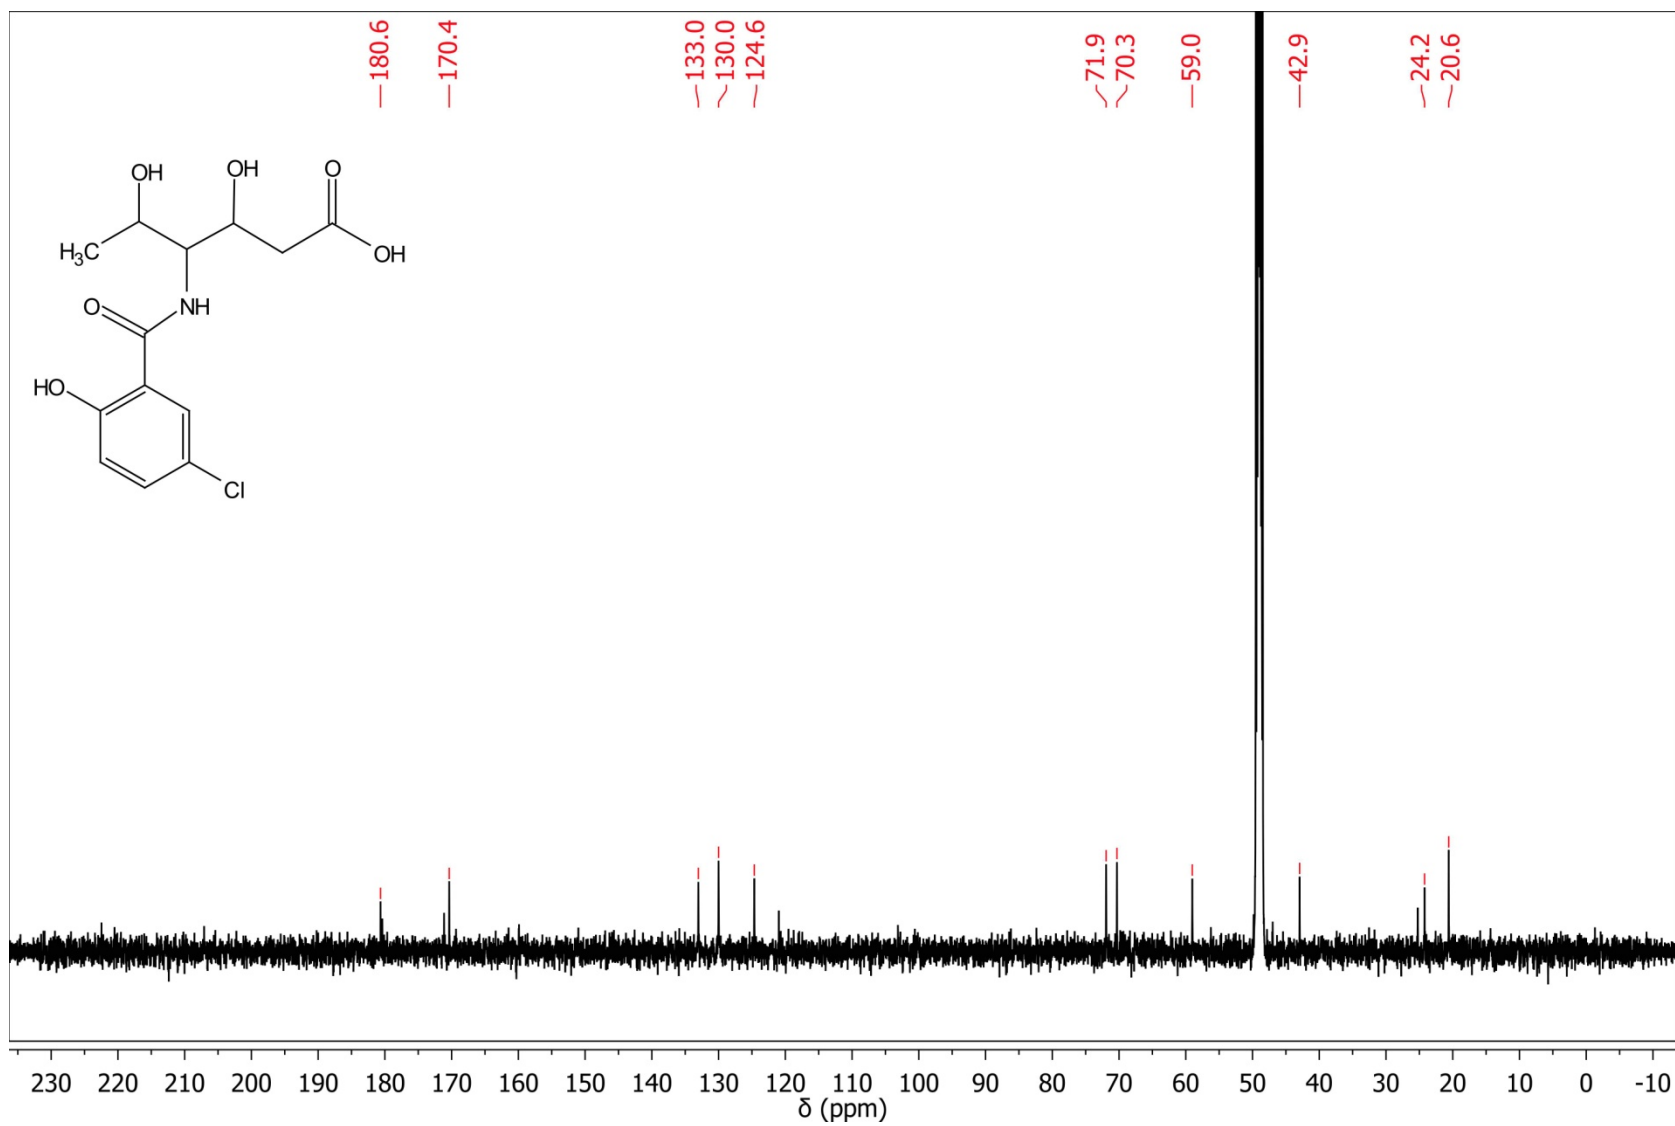

Figure S28. COSY Spectrum of Compound 5 in CD<sub>3</sub>OD (500 MHz)

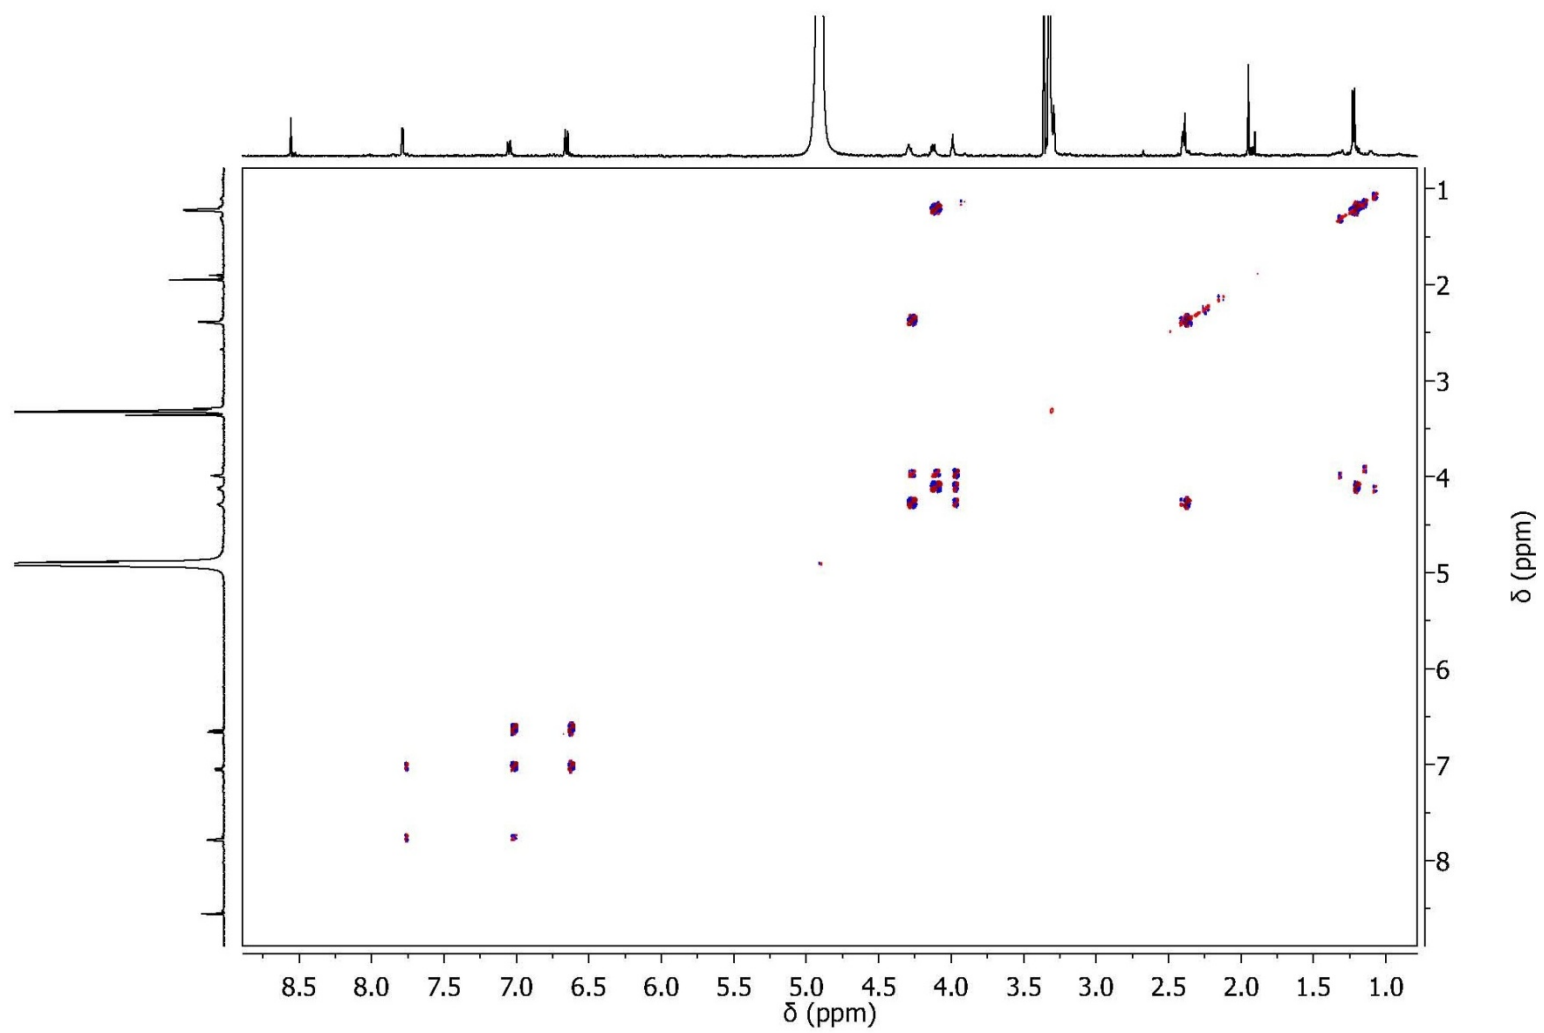

Figure S29. HSQC Spectrum of Compound 5 in CD<sub>3</sub>OD (500 MHz)

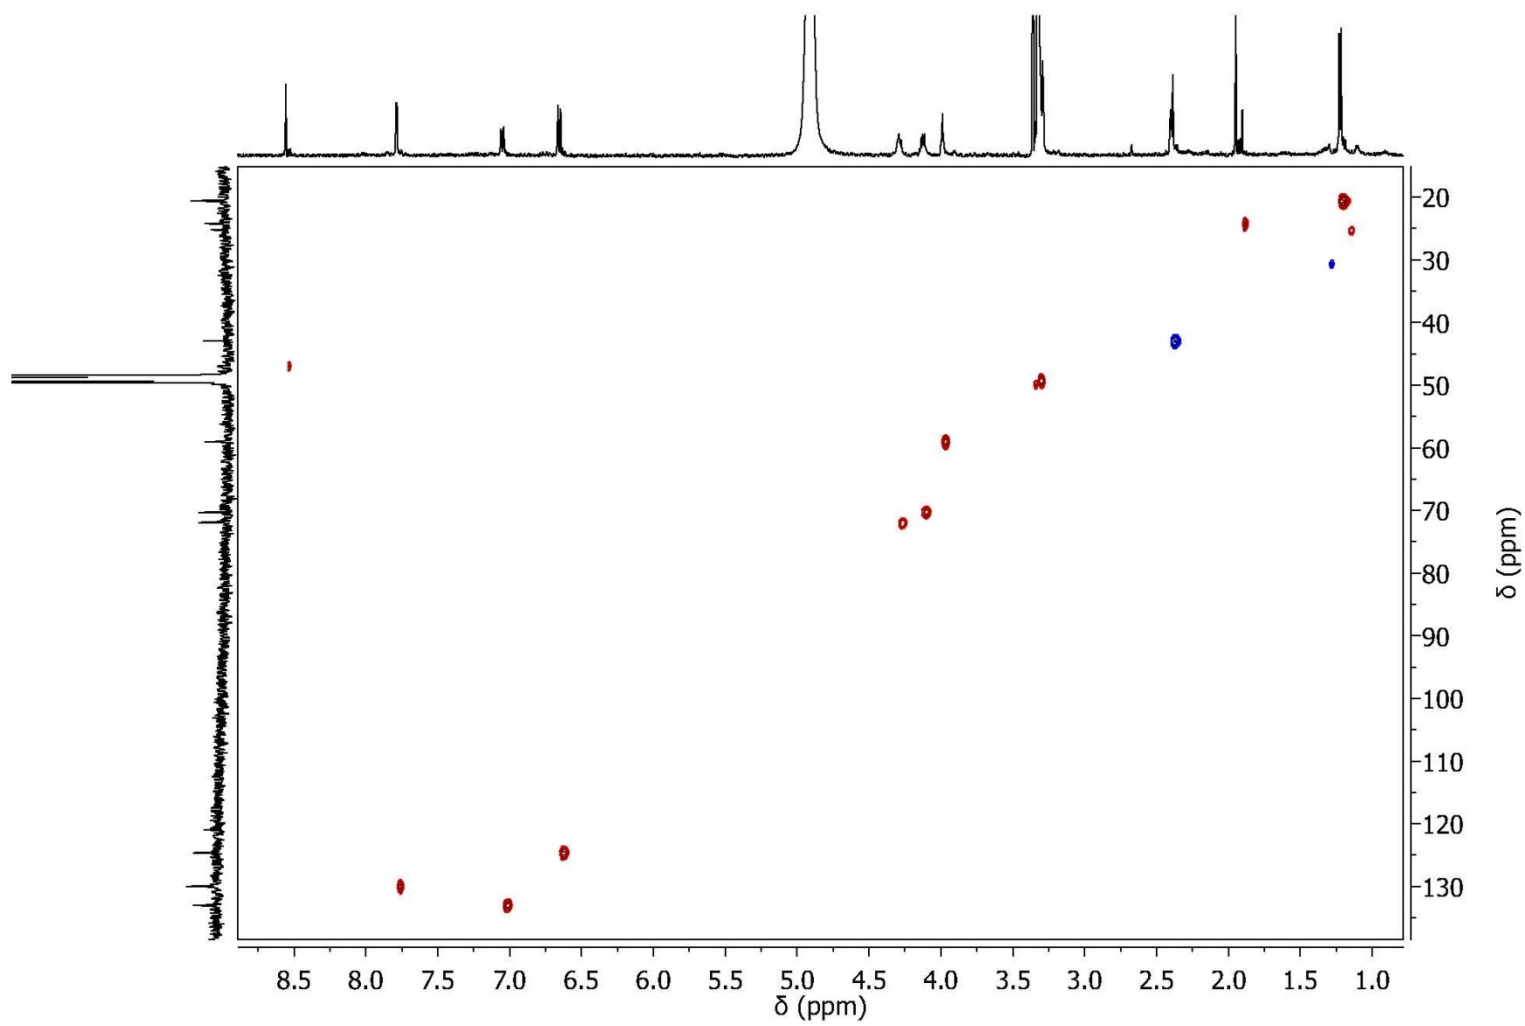

Figure S30. HMBC Spectrum of Compound 5 in CD<sub>3</sub>OD (500 MHz)

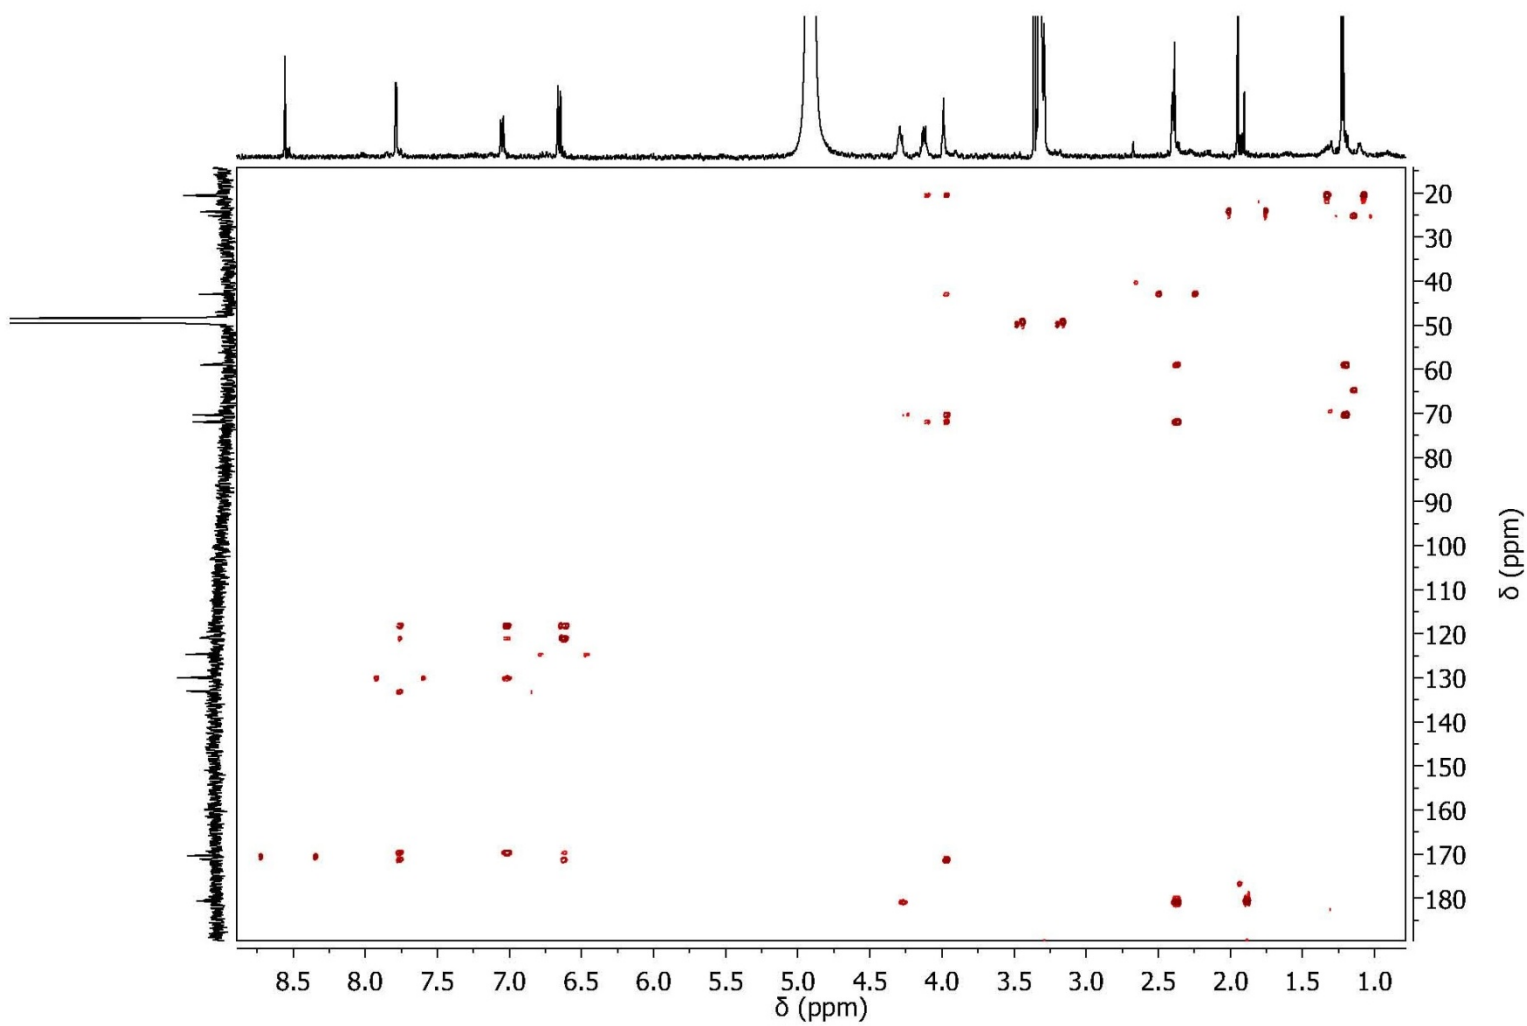

Figure S31. <sup>1</sup>H NMR Spectrum of Compound 6 in CD<sub>3</sub>OD (500 MHz)

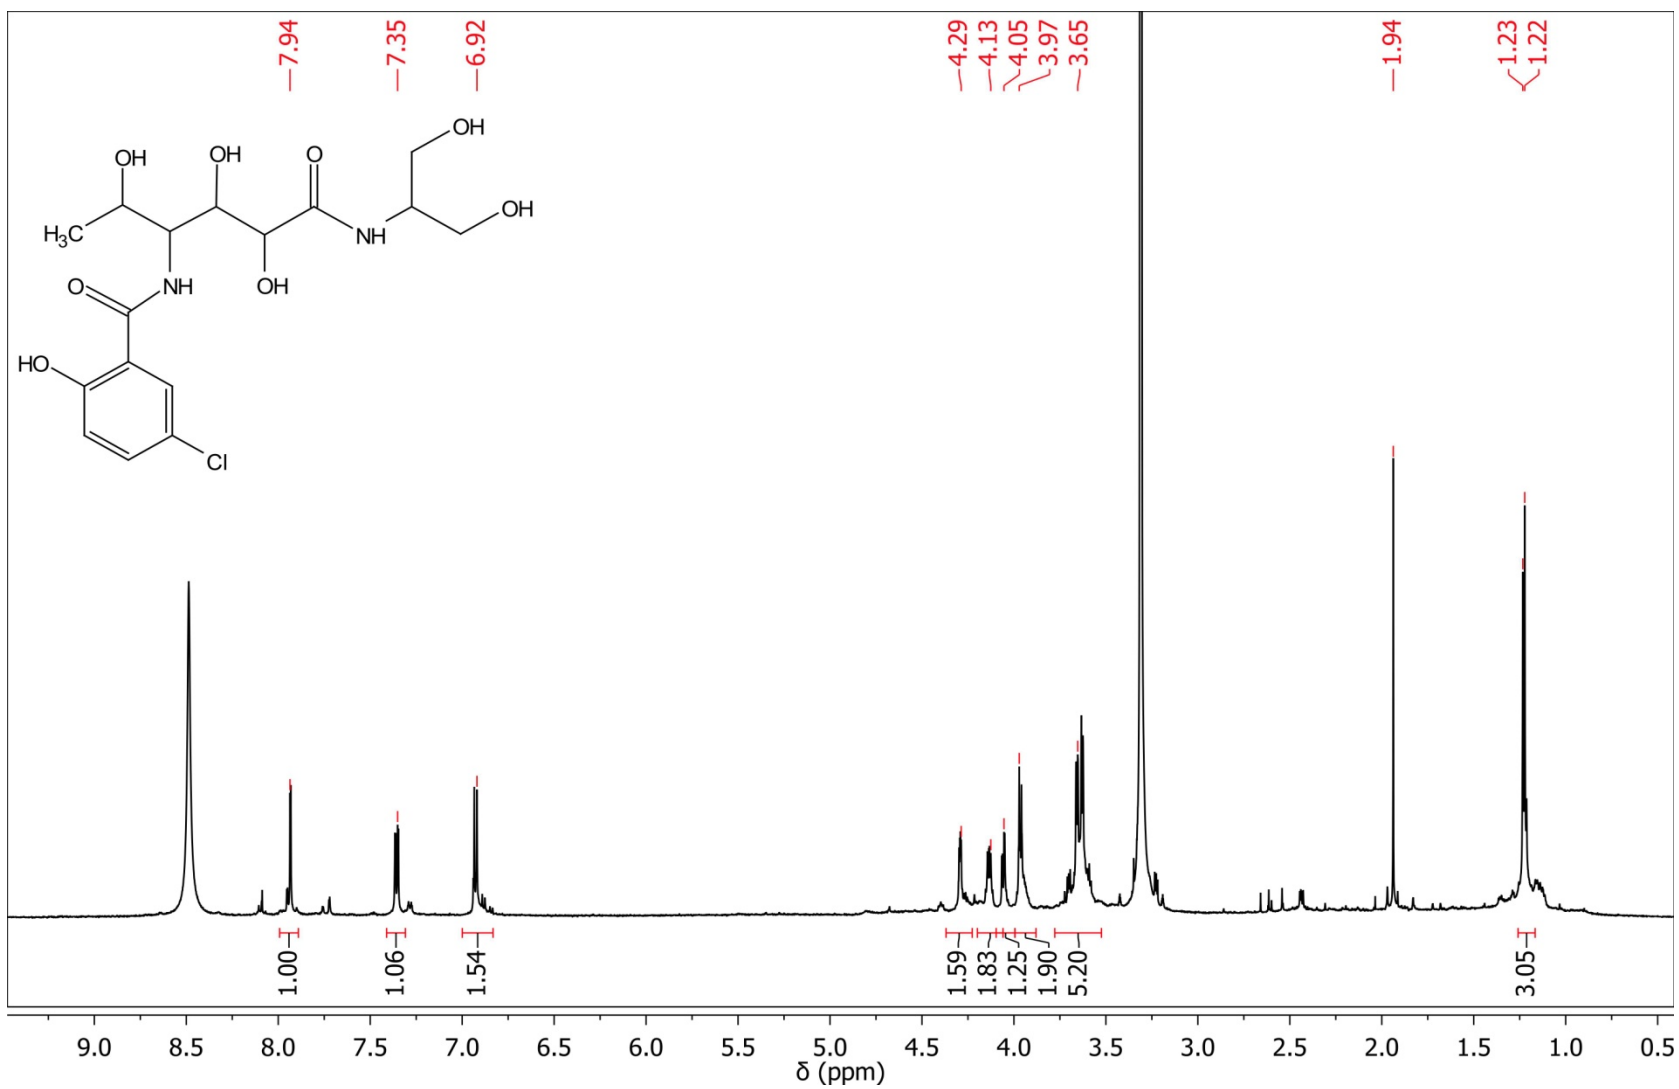

Figure S32.  $^{13}\text{C}$  NMR Spectrum of Compound 6 in  $\text{CD}_3\text{OD}$  (125 MHz)

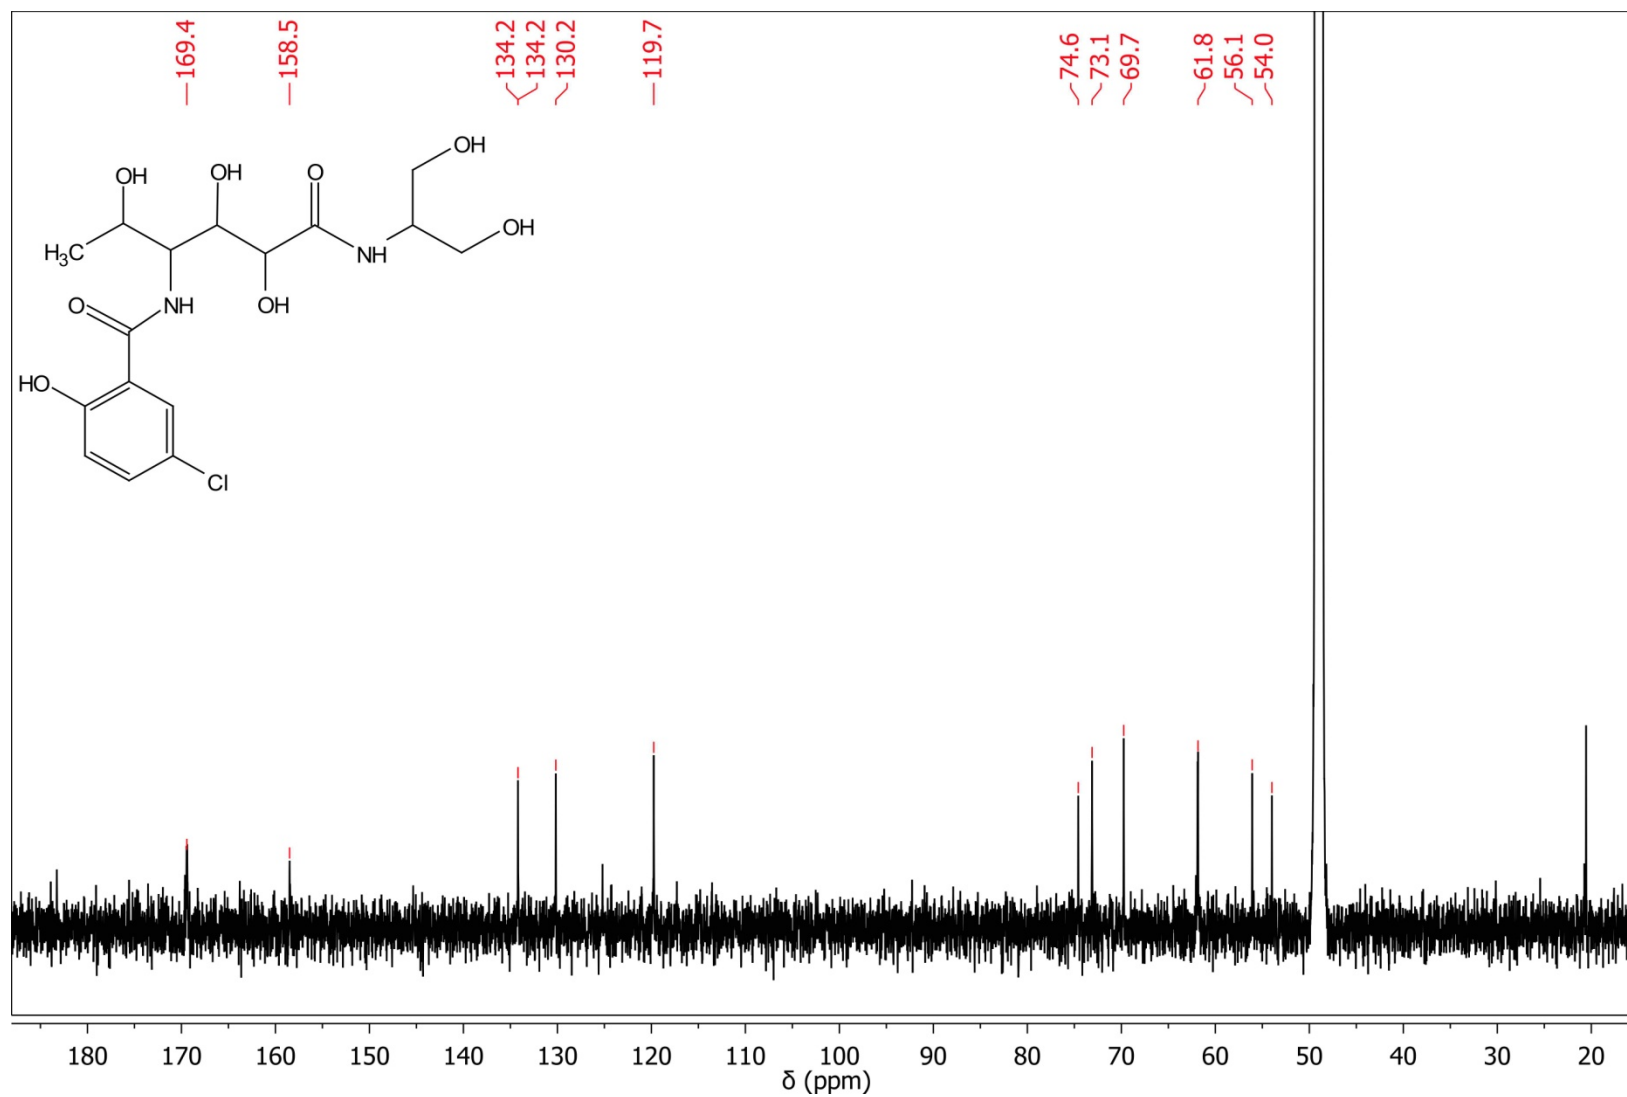

Figure S33. COSY Spectrum of Compound 6 in CD<sub>3</sub>OD (500 MHz)

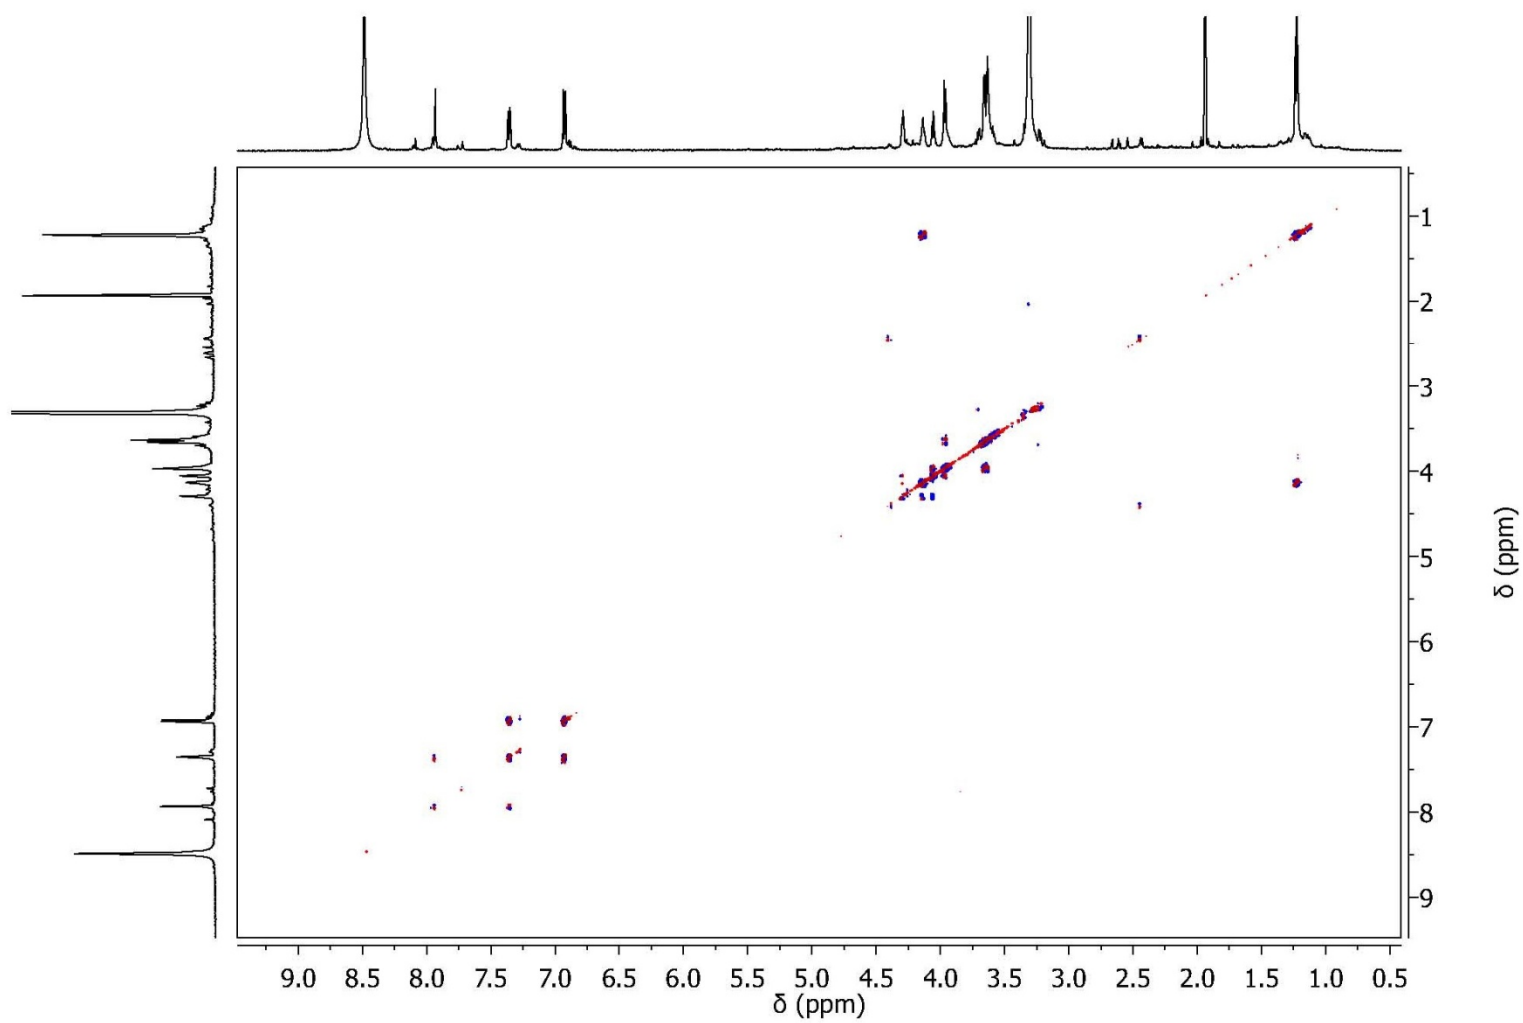



Figure S34. HSQC Spectrum of Compound 6 in CD<sub>3</sub>OD (500 MHz)

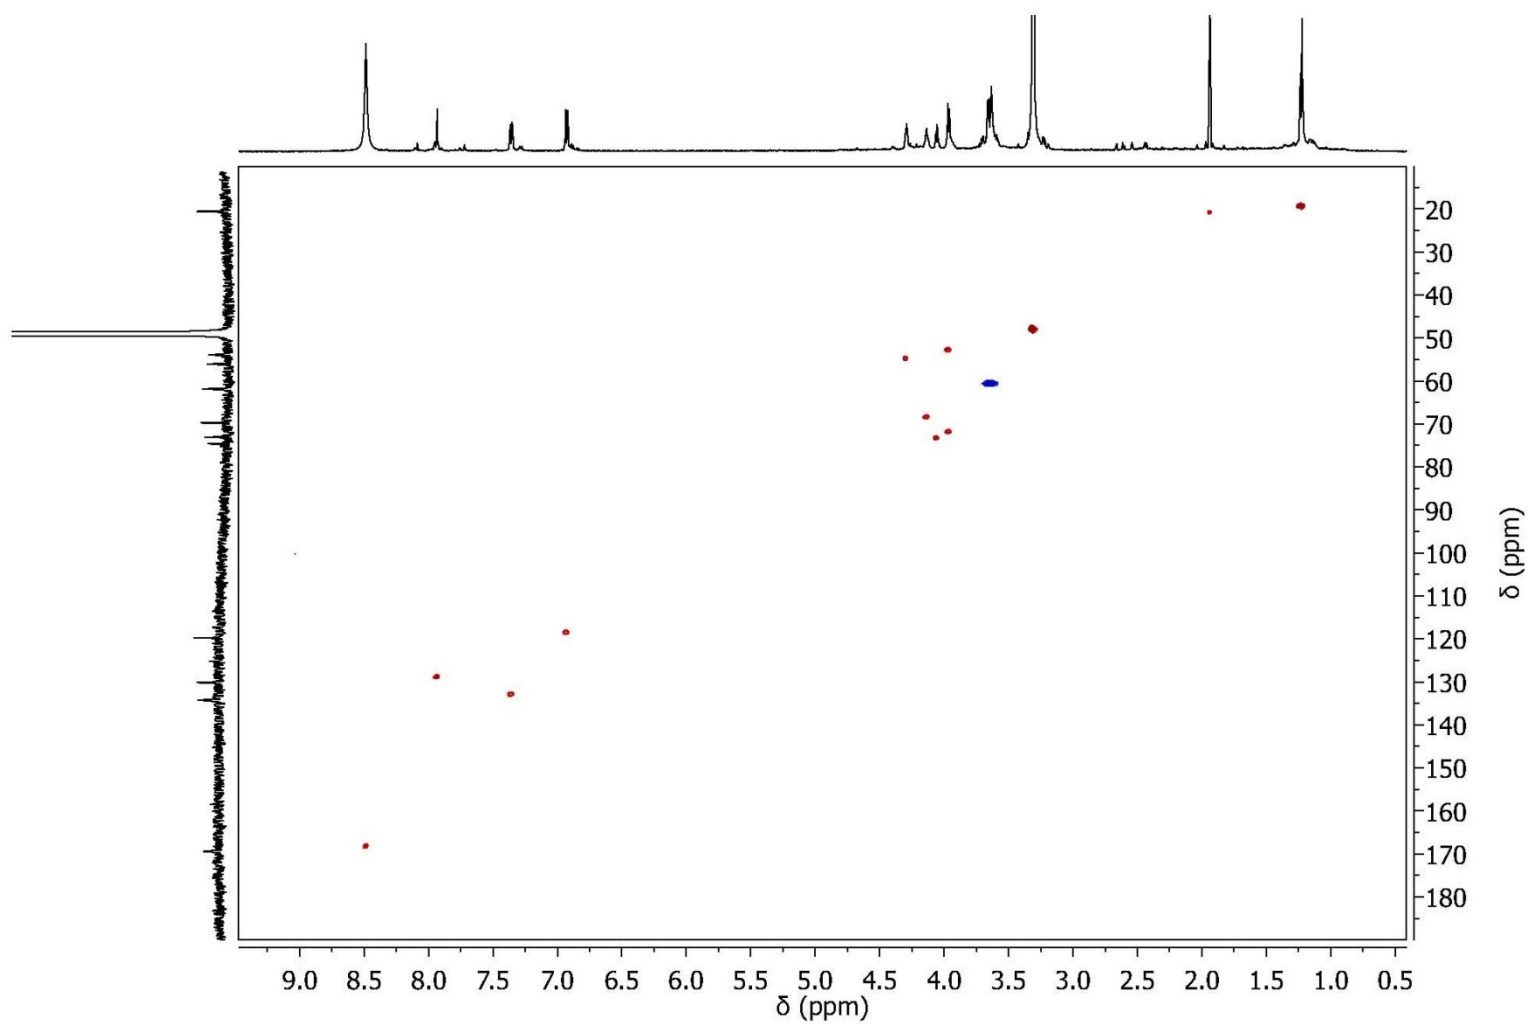

Figure S35. HMBC Spectrum of Compound 6 in CD<sub>3</sub>OD (500 MHz)

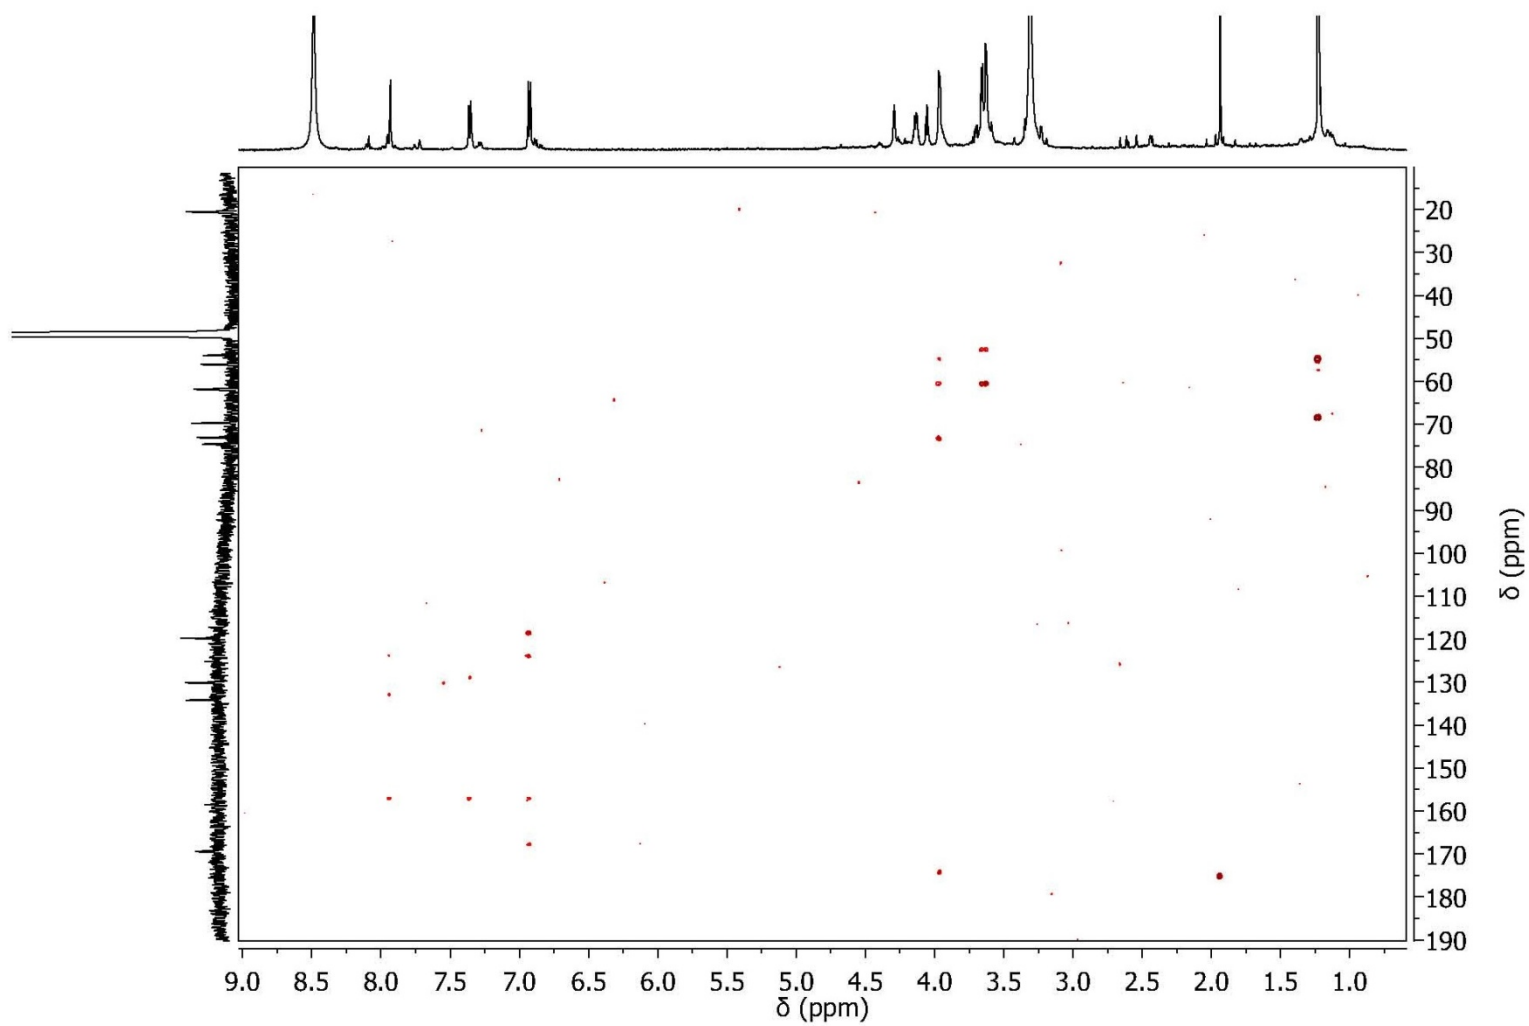

Figure S36.  $^1\text{H}$  NMR Spectrum of Compound 7 in  $\text{CD}_3\text{OD}$  (500 MHz)

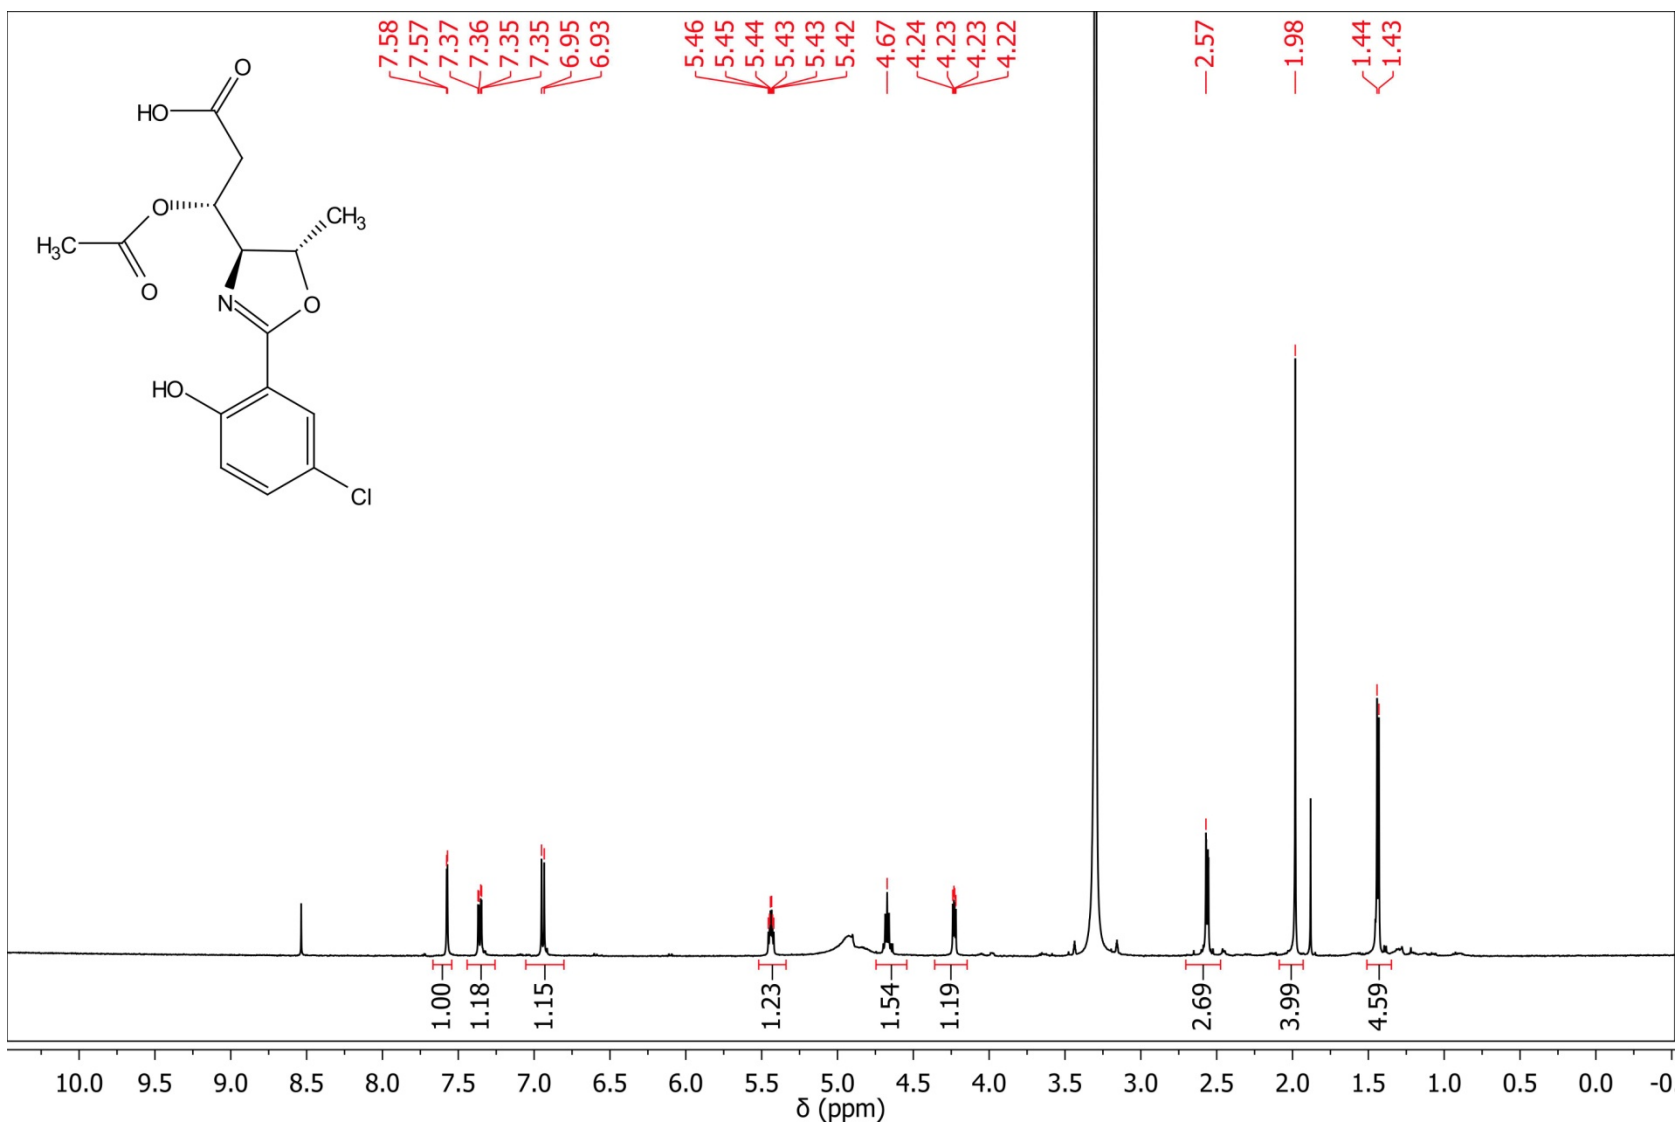

Figure S37. <sup>1</sup>H NMR Spectrum of Compound 8 in CD<sub>3</sub>OD (500 MHz)

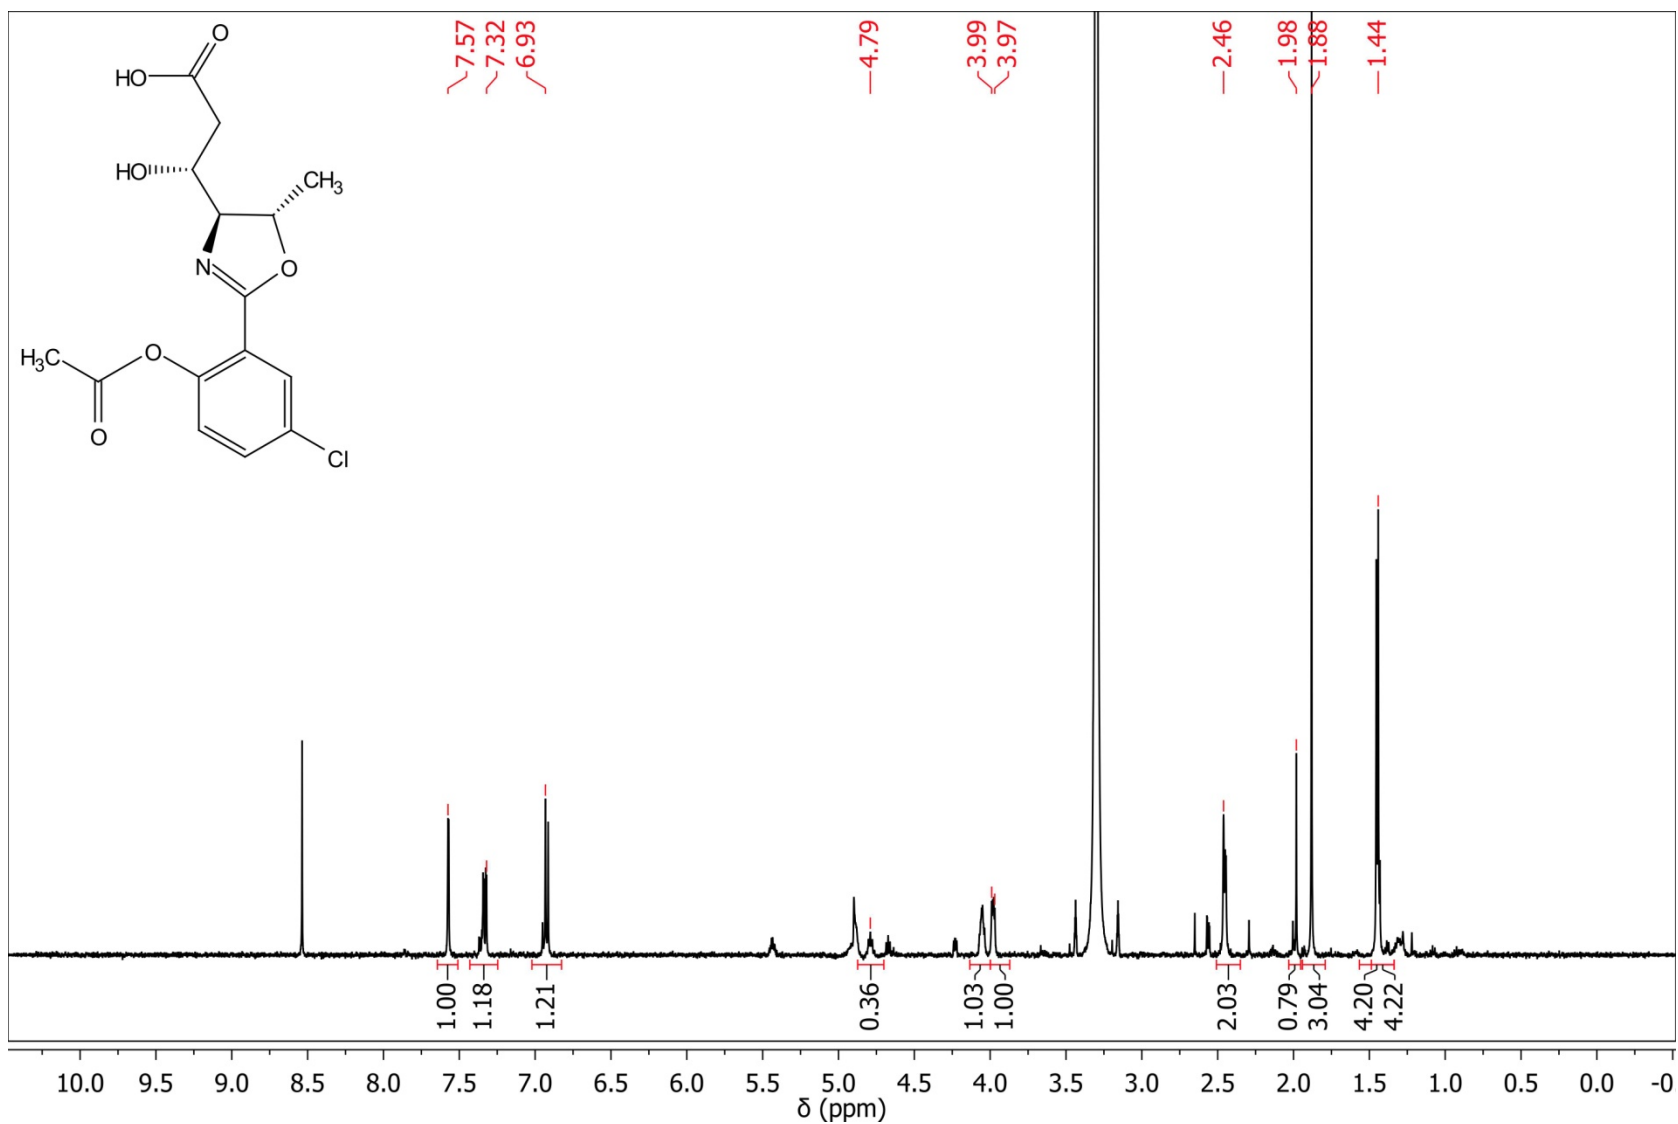

Figure S38. Growth Inhibition Curves for 2

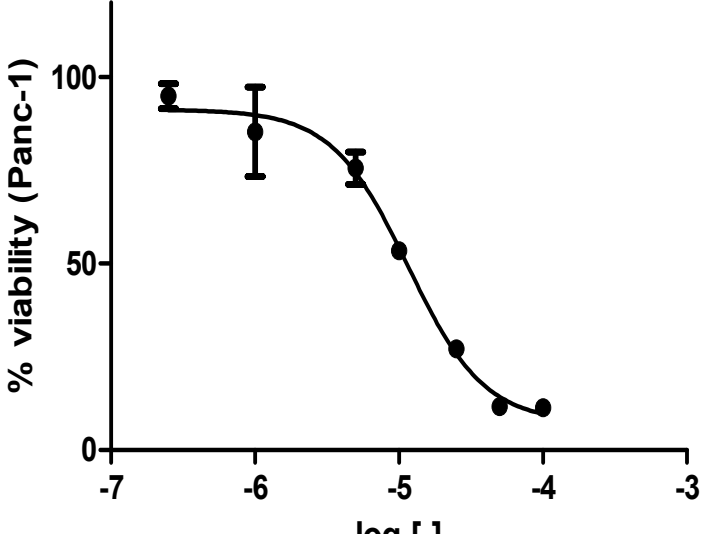

Figure S39. Micrographs of the Cyanobacterium O-2-5

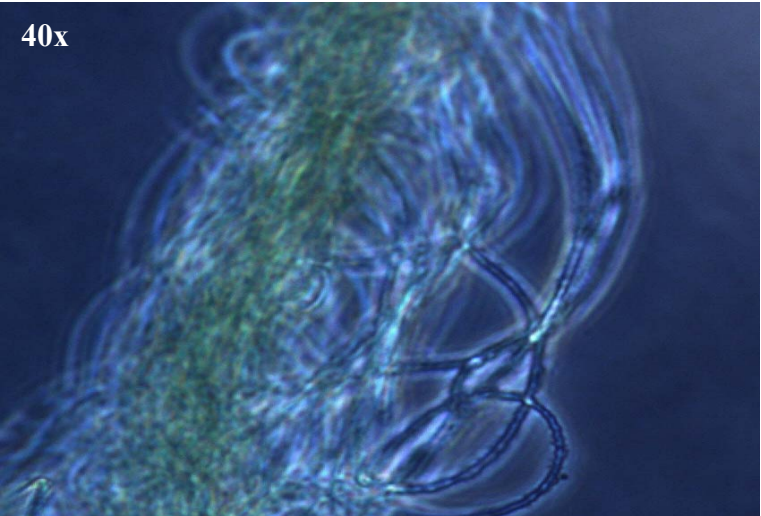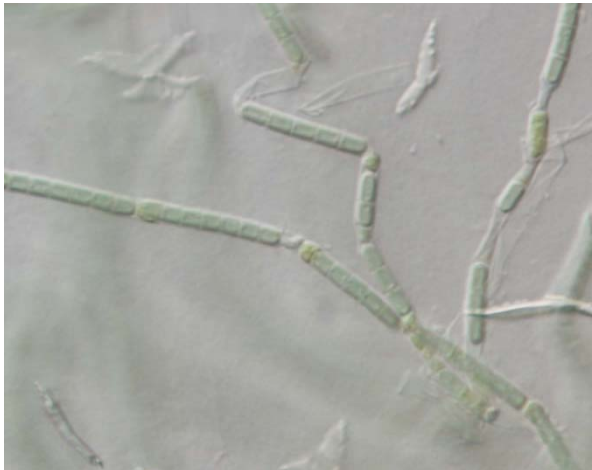

## Figure S40. 16S sRNA Sequence of the Cyanobacterium O-2-5

CGGACGGGGNNAGTAACGCGTGAGGATCTGCCTACAGGACTGGGACAACGACTGGAAACGGTCGCTAAAACCGGNATGTGCCGAGAGGTGAAATATTTATAGCCTGT  
AGATGAGCTCGCGTCTGATTAGCTAGTTGGTGAGGTAATGGCTCACCAAGGCGACGATCAGTAGCTGGTCTGAGAGGACGATCAGCCACACTGGGACTGAGACACGG  
CCCAGACTCCTACGGGAGGCAGCAGTGGGAATTTTCCGCAATGGGCGCAAGCCTGACGGAGCAATACCGCGTGAGGGAGGAAGGTCTGTGGATTGTAAACCTCTTT  
TGATAGGGAAGAACAACAATGACGGTACCTATCGAATCAGCATCGGCTAACTCCGTGCCAGCAGCCGCGTAATACGGAGGATGCAAGCGTTATCCGGAATTATTGGGC  
GTAAAGCGTCCGTAGGTGGTTAATCAAGTCTATTGTCAAAGCCTGGGGCTTAACCCTGGAGAGGCGGTGGAAACTGGTTAACTTGAGTGCGGTAGGGGCAGAGGGAAT  
TCCCAGTGTAGCGGTGAAATGCGTAGATATTGGGAAGAACACCGGTGGCGAAAGCGCTCTGCTGGGCCTGCACTGACACTGAGGGACGAAAGCTAGGGGAGCGAATG  
GGATTAGATACCCCCAGTAGTCA

**Figure S41. 16S sRNA Phylogenetic Analysis of Strain O-2-5**

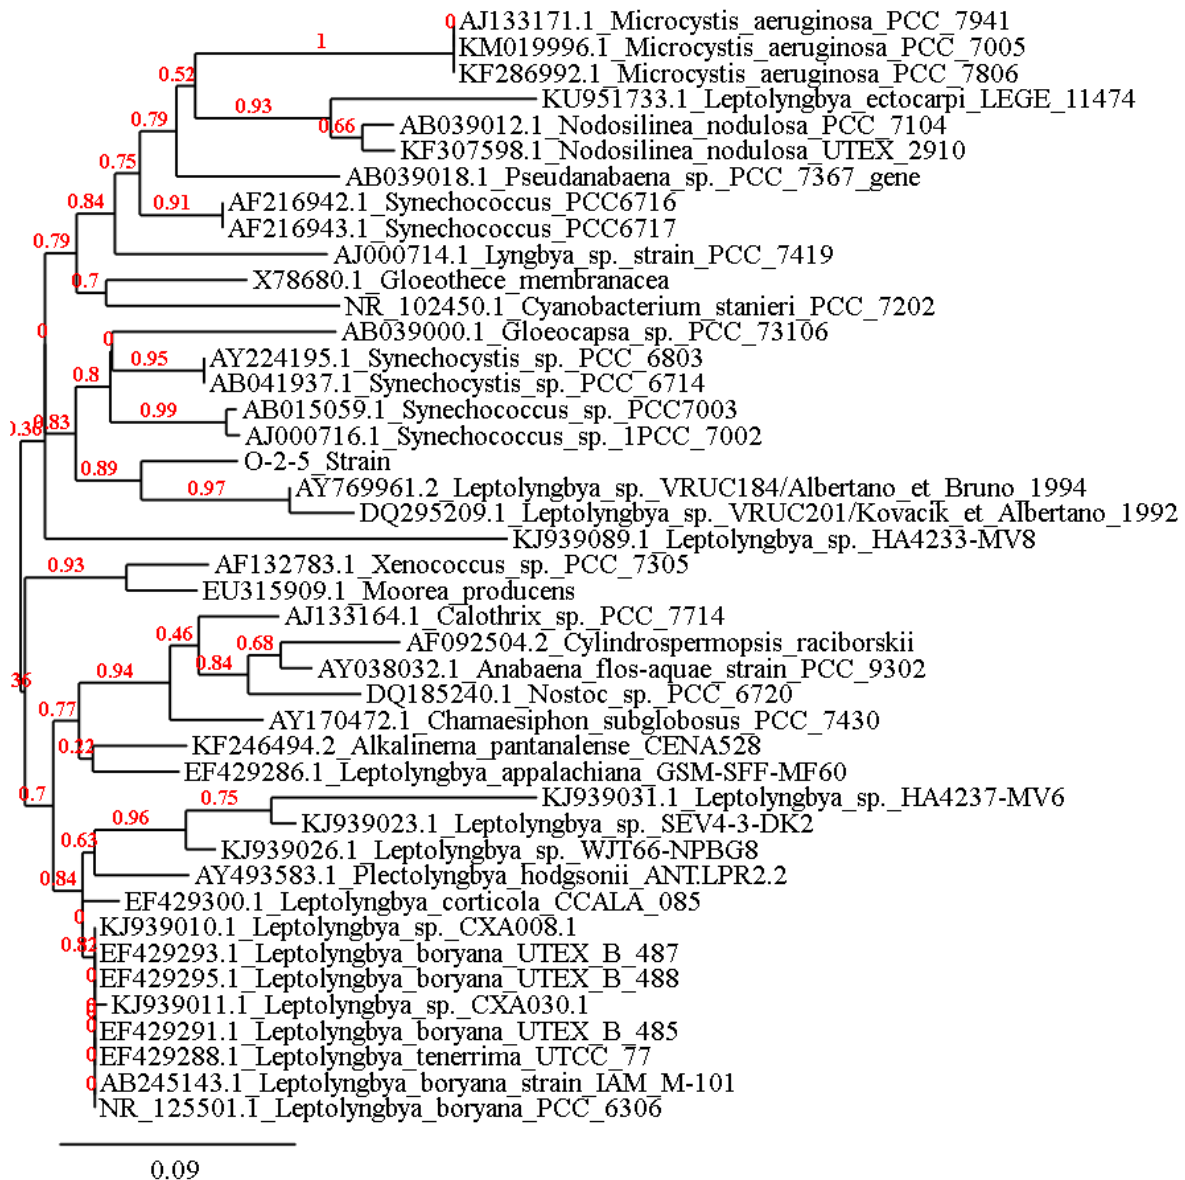

Dereeper A., Audic S., Claverie J.M., Blanc G. BMC Evol Biol. 2010 Jan 12;10:8.

Dereeper A.\*, Guignon V.\*, Blanc G., Audic S., Buffet S., Chevenet F., Dufayard J.F., Guindon S., Lefort V., Lescot M., Claverie J.M., Gascuel O. Nucleic Acids Res. 2008 Jul 1;36(Web Server issue):W465-9. Epub 2008 Apr 19.



**Table S6. Boltzmann Distribution of Conformers of (3S\*,4S\*,5S\*)-1a**

| <b>Conformer</b> | <b>Energy<br/>(kcal/mol)</b> | <b>Relative<br/>Energy<br/>(kcal/mol)</b> | <b>Boltzmann<br/>Factor</b> | <b>Equilibrium<br/>Mole<br/>Fraction</b> | <b>Number of<br/>Imaginary<br/>Frequencies</b> |
|------------------|------------------------------|-------------------------------------------|-----------------------------|------------------------------------------|------------------------------------------------|
| conformer #24    | -874980.3599                 | 0.00                                      | 1.000                       | 0.676                                    | 0                                              |
| conformer #1     | -874979.5567                 | 0.80                                      | 0.257                       | 0.174                                    | 0                                              |
| conformer #18    | -874978.7867                 | 1.57                                      | 0.070                       | 0.047                                    | 0                                              |
| conformer #27    | -874978.6989                 | 1.66                                      | 0.060                       | 0.041                                    | 0                                              |
| conformer #6     | -874978.3431                 | 2.02                                      | 0.033                       | 0.022                                    | 0                                              |
| conformer #23    | -874978.1573                 | 2.20                                      | 0.024                       | 0.016                                    | 0                                              |
| conformer #22    | -874977.6459                 | 2.71                                      | 0.010                       | 0.007                                    | 0                                              |
| conformer #10    | -874977.4206                 | 2.94                                      | 0.007                       | 0.005                                    | 0                                              |
| conformer #4     | -874977.1144                 | 3.25                                      | 0.004                       | 0.003                                    | 0                                              |
| conformer #16    | -874977.0435                 | 3.32                                      | 0.004                       | 0.002                                    | 0                                              |
| conformer #3     | -874976.9676                 | 3.39                                      | 0.003                       | 0.002                                    | 0                                              |
| conformer #12    | -874976.8396                 | 3.52                                      | 0.003                       | 0.002                                    | 0                                              |
| conformer #5     | -874976.6977                 | 3.66                                      | 0.002                       | 0.001                                    | 0                                              |
| conformer #19    | -874976.4034                 | 3.96                                      | 0.001                       | 0.001                                    | 0                                              |
| conformer #2     | -874975.7126                 | 4.65                                      | 0.000                       | 0.000                                    | 0                                              |
| conformer #11    | -874975.1516                 | 5.21                                      | 0.000                       | 0.000                                    | 0                                              |
| conformer #13    | -874974.9733                 | 5.39                                      | 0.000                       | 0.000                                    | 0                                              |
| conformer #26    | -874974.7782                 | 5.58                                      | 0.000                       | 0.000                                    | 0                                              |
| conformer #21    | -874973.3343                 | 7.03                                      | 0.000                       | 0.000                                    | 0                                              |
| conformer #20    | -874973.3136                 | 7.05                                      | 0.000                       | 0.000                                    | 0                                              |
| conformer #8     | -874972.8906                 | 7.47                                      | 0.000                       | 0.000                                    | 0                                              |
| conformer #7     | -874972.8812                 | 7.48                                      | 0.000                       | 0.000                                    | 0                                              |
| conformer #9     | -874972.8279                 | 7.53                                      | 0.000                       | 0.000                                    | 0                                              |
| conformer #17    | -874972.3485                 | 8.01                                      | 0.000                       | 0.000                                    | 0                                              |
| conformer #15    | -874972.3428                 | 8.02                                      | 0.000                       | 0.000                                    | 0                                              |
| conformer #28    | -874970.8236                 | 9.54                                      | 0.000                       | 0.000                                    | 0                                              |

**Table S7. Boltzmann Distribution of Conformers of (3*S*\*,4*S*\*,5*R*\*)-1b**

| <b>Conformer</b> | <b>Energy<br/>(kcal/mol)</b> | <b>Relative<br/>Energy<br/>(kcal/mol)</b> | <b>Boltzmann<br/>Factor</b> | <b>Equilibrium<br/>Mole<br/>Fraction</b> | <b>Number of<br/>Imaginary<br/>Frequencies</b> |
|------------------|------------------------------|-------------------------------------------|-----------------------------|------------------------------------------|------------------------------------------------|
| conformer #7     | -874977.05                   | 0.00                                      | 1.000                       | 0.518                                    | 0                                              |
| conformer #18    | -874976.75                   | 0.30                                      | 0.602                       | 0.312                                    | 0                                              |
| conformer #4     | -874975.83                   | 1.22                                      | 0.127                       | 0.066                                    | 0                                              |
| conformer #12    | -874975.5                    | 1.55                                      | 0.073                       | 0.038                                    | 0                                              |
| conformer #8     | -874975.47                   | 1.57                                      | 0.070                       | 0.036                                    | 0                                              |
| conformer #16    | -874974.94                   | 2.11                                      | 0.028                       | 0.015                                    | 0                                              |
| conformer #1     | -874974.68                   | 2.37                                      | 0.018                       | 0.009                                    | 0                                              |
| conformer #9     | -874973.98                   | 3.07                                      | 0.006                       | 0.003                                    | 0                                              |
| conformer #5     | -874973.43                   | 3.61                                      | 0.002                       | 0.001                                    | 0                                              |
| conformer #17    | -874972.73                   | 4.32                                      | 0.001                       | 0.000                                    | 0                                              |
| conformer #13    | -874972.51                   | 4.53                                      | 0.000                       | 0.000                                    | 0                                              |
| conformer #11    | -874972.49                   | 4.55                                      | 0.000                       | 0.000                                    | 0                                              |
| conformer #6     | -874972.39                   | 4.66                                      | 0.000                       | 0.000                                    | 0                                              |
| conformer #15    | -874971.72                   | 5.33                                      | 0.000                       | 0.000                                    | 0                                              |
| conformer #2     | -874970.93                   | 6.12                                      | 0.000                       | 0.000                                    | 0                                              |
| conformer #3     | -874970.07                   | 6.98                                      | 0.000                       | 0.000                                    | 0                                              |
| conformer #10    | -874968.92                   | 8.12                                      | 0.000                       | 0.000                                    | 0                                              |
| conformer #19    | -874968.47                   | 8.58                                      | 0.000                       | 0.000                                    | 0                                              |
| conformer #14    | -874967.85                   | 9.19                                      | 0.000                       | 0.000                                    | 0                                              |

**Table S8. Boltzmann Distribution of Conformers of (3*R*\*,4*S*\*,5*R*\*)-1c**

| <b>Conformer</b> | <b>Energy<br/>(kcal/mol)</b> | <b>Relative<br/>Energy<br/>(kcal/mol)</b> | <b>Boltzmann<br/>Factor</b> | <b>Equilibrium<br/>Mole<br/>Fraction</b> | <b>Number of<br/>Imaginary<br/>Frequencies</b> |
|------------------|------------------------------|-------------------------------------------|-----------------------------|------------------------------------------|------------------------------------------------|
| conformer #1     | -874977.46                   | 0.25                                      | 0.658                       | 0.261                                    | 0                                              |
| conformer #10    | -874975.12                   | 2.59                                      | 0.013                       | 0.005                                    | 0                                              |
| conformer #11    | -874973.38                   | 4.33                                      | 0.001                       | 0.000                                    | 0                                              |
| conformer #13    | -874971.33                   | 6.38                                      | 0.000                       | 0.000                                    | 0                                              |
| conformer #14    | -874976.55                   | 1.15                                      | 0.143                       | 0.057                                    | 0                                              |
| conformer #15    | -874973.79                   | 3.92                                      | 0.001                       | 0.001                                    | 0                                              |
| conformer #17    | -874970.8                    | 6.90                                      | 0.000                       | 0.000                                    | 0                                              |
| conformer #18    | -874974.79                   | 2.91                                      | 0.007                       | 0.003                                    | 0                                              |
| conformer #19    | -874976.61                   | 1.10                                      | 0.156                       | 0.062                                    | 0                                              |
| conformer #2     | -874973.9                    | 3.81                                      | 0.002                       | 0.001                                    | 0                                              |
| conformer #20    | -874973                      | 4.70                                      | 0.000                       | 0.000                                    | 0                                              |
| conformer #22    | -874971.41                   | 6.30                                      | 0.000                       | 0.000                                    | 0                                              |
| conformer #23    | -874973.82                   | 3.89                                      | 0.001                       | 0.001                                    | 0                                              |
| conformer #24    | -874976.6                    | 1.10                                      | 0.155                       | 0.061                                    | 0                                              |
| conformer #25    | -874976.09                   | 1.61                                      | 0.065                       | 0.026                                    | 0                                              |
| conformer #26    | -874967.85                   | 9.86                                      | 0.000                       | 0.000                                    | 0                                              |
| conformer #27    | -874977.7                    | 0.00                                      | 1.000                       | 0.397                                    | 0                                              |
| conformer #28    | -874967.36                   | 10.35                                     | 0.000                       | 0.000                                    | 0                                              |
| conformer #29    | -874972.41                   | 5.29                                      | 0.000                       | 0.000                                    | 0                                              |
| conformer #3     | -874973.51                   | 4.20                                      | 0.001                       | 0.000                                    | 0                                              |
| conformer #4     | -874970                      | 7.71                                      | 0.000                       | 0.000                                    | 0                                              |
| conformer #5     | -874973.81                   | 3.89                                      | 0.001                       | 0.001                                    | 0                                              |
| conformer #6     | -874970.22                   | 7.48                                      | 0.000                       | 0.000                                    | 0                                              |
| conformer #7     | -874973.64                   | 4.06                                      | 0.001                       | 0.000                                    | 0                                              |
| conformer #8     | -874977.02                   | 0.68                                      | 0.315                       | 0.125                                    | 0                                              |
| conformer #9     | -874970.01                   | 7.69                                      | 0.000                       | 0.000                                    | 0                                              |

**Table S9. Boltzmann Distribution of Conformers of (3R\*,4S\*,5S\*)-1d**

| Conformer     | Energy (kcal/mol) | Relative Energy (kcal/mol) | Boltzmann Factor | Equilibrium Mole Fraction | Number of Imaginary Frequencies |
|---------------|-------------------|----------------------------|------------------|---------------------------|---------------------------------|
| conformer #32 | -874980.28        | 0                          | 1                | 0.495                     | 0                               |
| conformer #1  | -874979.64        | 0.65                       | 0.335            | 0.165                     | 0                               |
| conformer #18 | -874979.35        | 0.94                       | 0.205            | 0.102                     | 0                               |
| conformer #34 | -874979.19        | 1.09                       | 0.158            | 0.078                     | 0                               |
| conformer #10 | -874978.99        | 1.3                        | 0.112            | 0.055                     | 0                               |
| conformer #21 | -874978.42        | 1.86                       | 0.043            | 0.021                     | 0                               |
| conformer #27 | -874978.34        | 1.95                       | 0.037            | 0.018                     | 0                               |
| conformer #13 | -874978.16        | 2.13                       | 0.027            | 0.013                     | 0                               |
|               | -                 |                            |                  |                           |                                 |
| conformer #29 | 874978.12         | 2.16                       | 0.026            | 0.013                     | 0                               |
| conformer #12 | -874978.11        | 2.18                       | 0.025            | 0.013                     | 0                               |
| conformer #19 | -874977.98        | 2.31                       | 0.02             | 0.010                     | 0                               |
| conformer #7  | -874977.63        | 2.65                       | 0.011            | 0.006                     | 0                               |
| conformer #2  | -874977.49        | 2.79                       | 0.009            | 0.004                     | 0                               |
| conformer #4  | -874977.18        | 3.1                        | 0.005            | 0.003                     | 0                               |
| conformer #9  | -874976.76        | 3.52                       | 0.003            | 0.001                     | 0                               |
| conformer #20 | -874976.73        | 3.55                       | 0.002            | 0.001                     | 0                               |
| conformer #26 | -874975.91        | 4.37                       | 0.001            | 0                         | 0                               |
| conformer #5  | -874975.41        | 4.88                       | 0                | 0                         | 0                               |
| conformer #15 | -874975.18        | 5.1                        | 0                | 0                         | 0                               |
| conformer #8  | -874974.13        | 6.15                       | 0                | 0                         | 0                               |
| conformer #16 | -874974.09        | 6.19                       | 0                | 0                         | 0                               |
| conformer #17 | -874974.09        | 6.19                       | 0                | 0                         | 0                               |
| conformer #31 | -874973.97        | 6.31                       | 0                | 0                         | 0                               |
| conformer #30 | -874973.67        | 6.61                       | 0                | 0                         | 0                               |
| conformer #6  | -874973.67        | 6.62                       | 0                | 0                         | 0                               |
| conformer #3  | -874973.58        | 6.7                        | 0                | 0                         | 0                               |
| conformer #11 | -874973.54        | 6.75                       | 0                | 0                         | 0                               |
| conformer #22 | -874973.18        | 7.1                        | 0                | 0                         | 0                               |
| conformer #33 | -874973.01        | 7.27                       | 0                | 0                         | 0                               |
| conformer #14 | -874971.94        | 8.34                       | 0                | 0                         | 0                               |
| conformer #24 | -874971.75        | 8.54                       | 0                | 0                         | 0                               |
| conformer #23 | -874971.13        | 9.15                       | 0                | 0                         | 0                               |
| conformer #25 | -874970.95        | 9.34                       | 0                | 0                         | 0                               |
| conformer #35 | -874970.36        | 9.93                       | 0                | 0                         | 0                               |

**Table S10. Boltzmann Distribution of Conformers of (2S\*,3R\*,4S\*,5S\*)-2a**

| <b>Conformer</b> | <b>Energy<br/>(kcal/mol)</b> | <b>Relative<br/>Energy<br/>(kcal/mol)</b> | <b>Boltzmann<br/>Factor</b> | <b>Equilibrium<br/>Mole<br/>Fraction</b> | <b>Number of<br/>Imaginary<br/>Frequencies</b> |
|------------------|------------------------------|-------------------------------------------|-----------------------------|------------------------------------------|------------------------------------------------|
| conformer #1     | -909695.77                   | 0.00                                      | 1.000                       | 0.992                                    | 0                                              |
| conformer #5     | -909692.8                    | 2.97                                      | 0.007                       | 0.007                                    | 0                                              |
| conformer #7     | -909691.85                   | 3.93                                      | 0.001                       | 0.001                                    | 0                                              |
| conformer #2     | -909691.39                   | 4.39                                      | 0.001                       | 0.001                                    | 0                                              |
| conformer #6     | -909689.09                   | 6.69                                      | 0.000                       | 0.000                                    | 0                                              |
| conformer #3     | -909689.02                   | 6.76                                      | 0.000                       | 0.000                                    | 0                                              |
| conformer #4     | -909687.67                   | 8.10                                      | 0.000                       | 0.000                                    | 0                                              |

**Table S11. Boltzmann Distribution of Conformers of (2S\*,3R\*,4S\*,5R\*)-2b**

| <b>Conformer</b> | <b>Energy<br/>(kcal/mol)</b> | <b>Relative<br/>Energy<br/>(kcal/mol)</b> | <b>Boltzmann<br/>Factor</b> | <b>Equilibrium<br/>Mole<br/>Fraction</b> | <b>Number of<br/>Imaginary<br/>Frequencies</b> |
|------------------|------------------------------|-------------------------------------------|-----------------------------|------------------------------------------|------------------------------------------------|
| conformer #1     | -909691.49                   | 0.00                                      | 1.000                       | 0.999                                    | 0                                              |
| conformer #2     | -909687.19                   | 4.29                                      | 0.001                       | 0.001                                    | 0                                              |
| conformer #3     | -909685.22                   | 6.26                                      | 0.000                       | 0.000                                    | 0                                              |
| conformer #4     | -909684.56                   | 6.93                                      | 0.000                       | 0.000                                    | 0                                              |

**Table S12. Boltzmann Distribution of Conformers of (2S\*,3S\*,4S\*,5R\*)-2c**

| <b>Conformer</b> | <b>Energy<br/>(kcal/mol)</b> | <b>Relative<br/>Energy<br/>(kcal/mol)</b> | <b>Boltzmann<br/>Factor</b> | <b>Equilibrium<br/>Mole<br/>Fraction</b> | <b>Number of<br/>Imaginary<br/>Frequencies</b> |
|------------------|------------------------------|-------------------------------------------|-----------------------------|------------------------------------------|------------------------------------------------|
| conformer #10    | -909693.2                    | 0.00                                      | 1.000                       | 0.915                                    | 0                                              |
| conformer #2     | -909691.21                   | 1.99                                      | 0.035                       | 0.032                                    | 0                                              |
| conformer #1     | -909690.97                   | 2.23                                      | 0.023                       | 0.021                                    | 0                                              |
| conformer #5     | -909690.76                   | 2.44                                      | 0.016                       | 0.015                                    | 0                                              |
| conformer #11    | -909690.74                   | 2.46                                      | 0.016                       | 0.014                                    | 0                                              |
| conformer #12    | -909689.8                    | 3.40                                      | 0.003                       | 0.003                                    | 0                                              |
| conformer #3     | -909687.93                   | 5.27                                      | 0.000                       | 0.000                                    | 0                                              |
| conformer #4     | -909687.25                   | 5.95                                      | 0.000                       | 0.000                                    | 0                                              |
| conformer #8     | -909685.23                   | 7.96                                      | 0.000                       | 0.000                                    | 0                                              |
| conformer #6     | -909685.22                   | 7.98                                      | 0.000                       | 0.000                                    | 0                                              |
| conformer #7     | -909684.91                   | 8.29                                      | 0.000                       | 0.000                                    | 0                                              |
| conformer #9     | -909684.74                   | 8.46                                      | 0.000                       | 0.000                                    | 0                                              |

**Table S13. Boltzmann Distribution of Conformers of (2S\*,3S\*,4S\*,5S\*)-2d**

| <b>Conformer</b> | <b>Energy<br/>(kcal/mol)</b> | <b>Relative<br/>Energy<br/>(kcal/mol)</b> | <b>Boltzmann<br/>Factor</b> | <b>Equilibrium<br/>Mole Fraction</b> | <b>Number of<br/>Imaginary<br/>Frequencies</b> |
|------------------|------------------------------|-------------------------------------------|-----------------------------|--------------------------------------|------------------------------------------------|
| conformer #1     | -909694                      | 0                                         | 1.000                       | 0.380                                | 0                                              |
| conformer #3     | -909694                      | 0.08                                      | 0.874                       | 0.332                                | 0                                              |
| conformer #7     | -909694                      | 0.19                                      | 0.730                       | 0.277                                | 0                                              |
| conformer #8     | -909692                      | 2.2                                       | 0.024                       | 0.009                                | 0                                              |
| conformer #2     | -909691                      | 3.33                                      | 0.004                       | 0.001                                | 0                                              |
| conformer #4     | -909690                      | 4.12                                      | 0.001                       | 0.000                                | 0                                              |
| conformer #5     | -909688                      | 5.65                                      | 0.000                       | 0.000                                | 0                                              |
| conformer #6     | -909688                      | 5.84                                      | 0.000                       | 0.000                                | 0                                              |

**Table S14. Boltzmann Distribution of Conformers of (2R\*,3R\*,4S\*,5S\*)-2e**

| <b>Conformer</b> | <b>Energy (kcal/mol)</b> | <b>Relative Energy (kcal/mol)</b> | <b>Boltzmann Factor</b> | <b>Equilibrium Mole Fraction</b> | <b>Number of Imaginary Frequencies</b> |
|------------------|--------------------------|-----------------------------------|-------------------------|----------------------------------|----------------------------------------|
| conformer #1     | -909695.54               | 0.00                              | 1.000                   | 0.951                            | 0                                      |
| conformer #8     | -909693.76               | 1.78                              | 0.050                   | 0.047                            | 0                                      |
| conformer #2     | -909691.72               | 3.81                              | 0.002                   | 0.002                            | 0                                      |
| conformer #5     | -909691.14               | 4.40                              | 0.001                   | 0.001                            | 0                                      |
| conformer #4     | -909689.35               | 6.19                              | 0.000                   | 0.000                            | 0                                      |
| conformer #3     | -909687.31               | 8.23                              | 0.000                   | 0.000                            | 0                                      |
| conformer #6     | -909686.69               | 8.85                              | 0.000                   | 0.000                            | 0                                      |

**Table S15. Boltzmann Distribution of Conformers of (2R\*,3R\*,4S\*,5R\*)-2f**

| <b>Conformer</b> | <b>Energy (kcal/mol)</b> | <b>Relative Energy (kcal/mol)</b> | <b>Boltzmann Factor</b> | <b>Equilibrium Mole Fraction</b> | <b>Number of Imaginary Frequencies</b> |
|------------------|--------------------------|-----------------------------------|-------------------------|----------------------------------|----------------------------------------|
| conformer #1     | -909690.66               | 0.00                              | 1.000                   | 0.996                            | 0                                      |
| conformer #6     | -909687.06               | 3.60                              | 0.002                   | 0.002                            | 0                                      |
| conformer #2     | -909686.87               | 3.78                              | 0.002                   | 0.002                            | 0                                      |
| conformer #5     | -909683.96               | 6.69                              | 0.000                   | 0.000                            | 0                                      |
| conformer #4     | -909683.36               | 7.30                              | 0.000                   | 0.000                            | 0                                      |
| conformer #3     | -909683.15               | 7.50                              | 0.000                   | 0.000                            | 0                                      |

**Table S16. Boltzmann Distribution of Conformers of (2R\*,3S\*,4S\*,5R\*)-2g**

| <b>Conformer</b> | <b>Energy (kcal/mol)</b> | <b>Relative Energy (kcal/mol)</b> | <b>Boltzmann Factor</b> | <b>Equilibrium Mole Fraction</b> | <b>Number of Imaginary Frequencies</b> |
|------------------|--------------------------|-----------------------------------|-------------------------|----------------------------------|----------------------------------------|
| conformer #7     | -909692.71               | 0.00                              | 1.000                   | 0.542                            | 0                                      |
| conformer #3     | -909692.53               | 0.18                              | 0.736                   | 0.399                            | 0                                      |
| conformer #2     | -909691.39               | 1.32                              | 0.107                   | 0.058                            | 0                                      |
| conformer #8     | -909688.66               | 4.05                              | 0.001                   | 0.001                            | 0                                      |
| conformer #1     | -909688.56               | 4.15                              | 0.001                   | 0.000                            | 0                                      |
| conformer #4     | -909688.08               | 4.63                              | 0.000                   | 0.000                            | 0                                      |
| conformer #9     | -909685.73               | 6.98                              | 0.000                   | 0.000                            | 0                                      |
| conformer #5     | -909685.39               | 7.32                              | 0.000                   | 0.000                            | 0                                      |
| conformer #6     | -909684.9                | 7.81                              | 0.000                   | 0.000                            | 0                                      |

**Table S17. Boltzmann Distribution of Conformers of (2R\*,3S\*,4S\*,5S\*)-2h**

| <b>Conformer</b> | <b>Energy (kcal/mol)</b> | <b>Relative Energy (kcal/mol)</b> | <b>Boltzmann Factor</b> | <b>Equilibrium Mole Fraction</b> | <b>Number of Imaginary Frequencies</b> |
|------------------|--------------------------|-----------------------------------|-------------------------|----------------------------------|----------------------------------------|
| conformer #3     | -909695.07               | 0.00                              | 1.000                   | 0.946                            | 0                                      |
| conformer #1     | -909693.37               | 1.70                              | 0.056                   | 0.053                            | 0                                      |
| conformer #4     | -909690.98               | 4.09                              | 0.001                   | 0.001                            | 0                                      |
| conformer #2     | -909689.69               | 5.38                              | 0.000                   | 0.000                            | 0                                      |
| conformer #6     | -909688.72               | 6.35                              | 0.000                   | 0.000                            | 0                                      |
| conformer #5     | -909687.24               | 7.83                              | 0.000                   | 0.000                            | 0                                      |



## XYZ Coordinates of Conformers

### for the Diastereomers of 1

#### 1d NMR Conformer 35

Energy: -875532.0543687

|    |          |          |          |
|----|----------|----------|----------|
| O  | -1.77742 | 2.87577  | -0.37603 |
| C  | -2.45820 | 1.71700  | -0.24738 |
| C  | -1.87626 | 0.46775  | 0.04053  |
| C  | -0.42955 | 0.27817  | 0.23301  |
| N  | 0.18135  | -0.83708 | 0.30543  |
| C  | 1.59455  | -0.53107 | 0.56929  |
| C  | 2.48345  | -1.41655 | -0.30975 |
| O  | 2.14144  | -2.77401 | -0.09987 |
| C  | 3.96482  | -1.31068 | 0.03750  |
| C  | 4.66925  | -0.10935 | -0.55502 |
| O  | 5.86769  | 0.19599  | -0.03804 |
| O  | 4.23162  | 0.55880  | -1.46389 |
| C  | 1.71149  | 0.98782  | 0.32635  |
| C  | 2.49367  | 1.76148  | 1.36350  |
| O  | 0.31732  | 1.40833  | 0.36059  |
| C  | -2.69441 | -0.66898 | 0.13769  |
| C  | -4.05822 | -0.56120 | -0.04674 |
| Cl | -5.06447 | -1.98550 | 0.08104  |
| C  | -4.64647 | 0.67354  | -0.33260 |
| C  | -3.84621 | 1.79842  | -0.43059 |
| H  | -0.82745 | 2.74435  | -0.21073 |
| H  | 1.80870  | -0.78172 | 1.62133  |
| H  | 2.33132  | -1.13633 | -1.36233 |
| H  | 1.17842  | -2.85842 | -0.20793 |
| H  | 4.46994  | -2.19955 | -0.36282 |
| H  | 4.10691  | -1.33468 | 1.12560  |
| H  | 6.13751  | -0.40407 | 0.68480  |
| H  | 2.07145  | 1.19717  | -0.68647 |
| H  | 3.54118  | 1.44382  | 1.35902  |
| H  | 2.46646  | 2.83291  | 1.15283  |
| H  | 2.08223  | 1.58095  | 2.36046  |
| H  | -2.23435 | -1.62650 | 0.36209  |
| H  | -5.72069 | 0.74830  | -0.47492 |
| H  | -4.27775 | 2.76966  | -0.65339 |

#### 1d NMR Conformer 34

Energy: -875540.5706700

|   |         |          |          |
|---|---------|----------|----------|
| O | 1.32006 | -2.53201 | -0.87853 |
| C | 2.22205 | -1.63670 | -0.44488 |

|    |          |          |          |
|----|----------|----------|----------|
| C  | 1.89915  | -0.28661 | -0.19625 |
| C  | 0.52926  | 0.17875  | -0.41128 |
| N  | -0.43683 | -0.56705 | -0.80702 |
| C  | -1.63678 | 0.26961  | -0.88335 |
| C  | -2.71541 | -0.28062 | 0.05500  |
| O  | -3.02848 | -1.61931 | -0.27238 |
| C  | -4.01374 | 0.50765  | -0.07754 |
| C  | -5.09915 | -0.06970 | 0.79821  |
| O  | -4.72027 | -0.16094 | 2.07792  |
| O  | -6.19692 | -0.40365 | 0.40977  |
| C  | -1.13895 | 1.68586  | -0.49996 |
| C  | -1.25658 | 2.70941  | -1.60910 |
| O  | 0.26554  | 1.47665  | -0.18608 |
| C  | 2.88558  | 0.60275  | 0.25151  |
| C  | 4.17528  | 0.14553  | 0.44947  |
| Cl | 5.40874  | 1.25203  | 1.00824  |
| C  | 4.50907  | -1.18982 | 0.20833  |
| C  | 3.53692  | -2.07192 | -0.23625 |
| H  | 0.44521  | -2.07895 | -0.98609 |
| H  | -2.02884 | 0.24291  | -1.90998 |
| H  | -2.34539 | -0.21393 | 1.08984  |
| H  | -2.22803 | -2.16169 | -0.16714 |
| H  | -4.36922 | 0.48478  | -1.11077 |
| H  | -3.85750 | 1.55078  | 0.22330  |
| H  | -5.45735 | -0.53719 | 2.60277  |
| H  | -1.60376 | 2.04773  | 0.42500  |
| H  | -2.31285 | 2.87886  | -1.84093 |
| H  | -0.80829 | 3.65983  | -1.31138 |
| H  | -0.75691 | 2.34546  | -2.51190 |
| H  | 2.62807  | 1.64072  | 0.43918  |
| H  | 5.52731  | -1.53262 | 0.36878  |
| H  | 3.77692  | -3.11293 | -0.43068 |

#### 1d NMR Conformer 33

Energy: -875534.3141370

|   |          |          |          |
|---|----------|----------|----------|
| O | -2.47070 | -2.79681 | 0.20188  |
| C | -2.74146 | -1.47878 | 0.08933  |
| C | -1.77304 | -0.46743 | -0.05461 |
| C | -0.32530 | -0.73420 | -0.09867 |
| N | 0.59739  | 0.14408  | -0.08488 |
| C | 1.87287  | -0.57343 | -0.17707 |
| C | 2.80504  | -0.15023 | 0.96453  |
| O | 2.18543  | -0.36002 | 2.21793  |
| C | 3.25494  | 1.30296  | 0.82142  |
| C | 4.22199  | 1.51054  | -0.32322 |
| O | 4.54556  | 2.77884  | -0.61312 |
| O | 4.72121  | 0.61206  | -0.96105 |
| C | 1.50150  | -2.07117 | -0.11664 |
| C | 2.04113  | -2.90605 | -1.25571 |

|    |          |          |          |   |          |          |          |
|----|----------|----------|----------|---|----------|----------|----------|
| O  | 0.04815  | -2.04003 | -0.17706 | H | -5.96711 | -2.35022 | 0.87464  |
| C  | -2.18375 | 0.87086  | -0.15438 | H | -1.30674 | 2.56675  | 0.80717  |
| C  | -3.52602 | 1.19086  | -0.11128 | H | -1.90350 | 3.82370  | -1.29070 |
| Cl | -4.02228 | 2.86206  | -0.24141 | H | -0.27916 | 4.26176  | -0.72381 |
| C  | -4.49519 | 0.19474  | 0.03140  | H | -0.47173 | 3.14200  | -2.09487 |
| C  | -4.09807 | -1.12726 | 0.13064  | H | 2.79728  | 1.44336  | 0.57688  |
| H  | -1.51404 | -2.96509 | 0.14179  | H | 5.06272  | -2.16205 | -0.01139 |
| H  | 2.35434  | -0.32924 | -1.13341 | H | 3.03410  | -3.29108 | -0.90553 |
| H  | 3.68715  | -0.80049 | 0.95096  |   |          |          |          |
| H  | 1.36325  | 0.16148  | 2.25137  |   |          |          |          |
| H  | 3.76084  | 1.61392  | 1.74391  |   |          |          |          |
| H  | 2.38481  | 1.95891  | 0.68898  |   |          |          |          |
| H  | 4.08737  | 3.42783  | -0.04503 |   |          |          |          |
| H  | 1.76152  | -2.50071 | 0.85745  |   |          |          |          |
| H  | 3.13511  | -2.89945 | -1.22072 |   |          |          |          |
| H  | 1.69924  | -3.94112 | -1.18281 |   |          |          |          |
| H  | 1.72106  | -2.48976 | -2.21530 |   |          |          |          |
| H  | -1.42879 | 1.64276  | -0.26774 |   |          |          |          |
| H  | -5.54888 | 0.45707  | 0.06249  |   |          |          |          |
| H  | -4.83113 | -1.92045 | 0.24301  |   |          |          |          |

**1d NMR Conformer 32**

Energy: -875541.1477590

|    |          |          |          |
|----|----------|----------|----------|
| O  | 0.71302  | -2.22897 | -1.16243 |
| C  | 1.77551  | -1.57128 | -0.66957 |
| C  | 1.71159  | -0.22738 | -0.24742 |
| C  | 0.44577  | 0.49907  | -0.34599 |
| N  | -0.64877 | -0.00924 | -0.78516 |
| C  | -1.67476 | 1.03289  | -0.72111 |
| C  | -2.82887 | 0.59758  | 0.18868  |
| O  | -2.37128 | 0.36845  | 1.50720  |
| C  | -3.55062 | -0.62400 | -0.36798 |
| C  | -4.81717 | -0.91788 | 0.39639  |
| O  | -5.11799 | -2.22032 | 0.40021  |
| O  | -5.51025 | -0.08109 | 0.93137  |
| C  | -0.92530 | 2.27523  | -0.17720 |
| C  | -0.88746 | 3.45020  | -1.13046 |
| O  | 0.42780  | 1.78528  | 0.03692  |
| C  | 2.85473  | 0.40760  | 0.25536  |
| C  | 4.04439  | -0.29307 | 0.33476  |
| Cl | 5.47282  | 0.49704  | 0.95929  |
| C  | 4.12064  | -1.62476 | -0.07961 |
| C  | 2.99239  | -2.25653 | -0.57774 |
| H  | -0.06571 | -1.61289 | -1.17052 |
| H  | -2.07176 | 1.21688  | -1.72924 |
| H  | -3.53925 | 1.42840  | 0.27031  |
| H  | -1.73995 | -0.37425 | 1.50076  |
| H  | -2.89964 | -1.50292 | -0.35766 |
| H  | -3.84140 | -0.44721 | -1.41263 |

**1d NMR Conformer 31**

Energy: -875536.1637149

|    |          |          |          |
|----|----------|----------|----------|
| O  | 1.62140  | 2.74626  | 0.09491  |
| C  | 2.39053  | 1.64892  | 0.01725  |
| C  | 1.86503  | 0.34332  | 0.08445  |
| C  | 0.42779  | 0.15270  | 0.27330  |
| N  | -0.42637 | 1.10668  | 0.37142  |
| C  | -1.73256 | 0.49429  | 0.63140  |
| C  | -2.79634 | 1.11583  | -0.27444 |
| O  | -2.88298 | 2.50126  | -0.00463 |
| C  | -4.19144 | 0.56088  | -0.00451 |
| C  | -4.49995 | -0.74404 | -0.70058 |
| O  | -5.53819 | -1.44096 | -0.22313 |
| O  | -3.91338 | -1.15370 | -1.67414 |
| C  | -1.48368 | -1.01656 | 0.41282  |
| C  | -2.01758 | -1.91759 | 1.50374  |
| O  | -0.02925 | -1.10567 | 0.37357  |
| C  | 2.71688  | -0.76509 | -0.01592 |
| C  | 4.07472  | -0.56707 | -0.17719 |
| Cl | 5.14199  | -1.94769 | -0.30395 |
| C  | 4.61035  | 0.72173  | -0.24002 |
| C  | 3.77122  | 1.81936  | -0.14264 |
| H  | 0.67632  | 2.46537  | 0.20357  |
| H  | -2.01928 | 0.70965  | 1.67316  |
| H  | -2.52024 | 0.93332  | -1.32352 |
| H  | -2.02635 | 2.91050  | -0.22004 |
| H  | -4.92189 | 1.28840  | -0.38288 |
| H  | -4.36906 | 0.47136  | 1.07534  |
| H  | -5.95027 | -1.03269 | 0.56297  |
| H  | -1.83521 | -1.33894 | -0.57317 |
| H  | -3.10998 | -1.84187 | 1.54891  |
| H  | -1.75912 | -2.96141 | 1.31224  |
| H  | -1.61475 | -1.61831 | 2.47553  |
| H  | 2.30232  | -1.76753 | 0.03621  |
| H  | 5.68065  | 0.85908  | -0.36689 |
| H  | 4.16699  | 2.82947  | -0.19273 |

**1d NMR Conformer 30**

Energy: -875533.9523276

|   |          |         |          |
|---|----------|---------|----------|
| O | -2.26888 | 2.83677 | -0.47727 |
|---|----------|---------|----------|

|    |          |          |          |
|----|----------|----------|----------|
| C  | -2.72458 | 1.58237  | -0.27119 |
| C  | -1.91285 | 0.45647  | -0.03581 |
| C  | -0.44191 | 0.51273  | 0.01668  |
| N  | 0.33890  | -0.46573 | 0.24911  |
| C  | 1.71222  | 0.04953  | 0.19005  |
| C  | 2.46781  | -0.70756 | -0.90904 |
| O  | 2.46378  | -2.09356 | -0.63476 |
| C  | 3.93364  | -0.29972 | -1.08575 |
| C  | 4.81492  | -0.72709 | 0.06318  |
| O  | 4.58704  | -0.01492 | 1.17606  |
| O  | 5.64949  | -1.60205 | 0.00638  |
| C  | 1.56463  | 1.56628  | -0.07425 |
| C  | 2.07645  | 2.44141  | 1.04966  |
| O  | 0.12538  | 1.72945  | -0.20471 |
| C  | -2.51433 | -0.79571 | 0.16640  |
| C  | -3.88853 | -0.92144 | 0.13215  |
| Cl | -4.62157 | -2.48820 | 0.38583  |
| C  | -4.70305 | 0.18921  | -0.10175 |
| C  | -4.11799 | 1.42734  | -0.30064 |
| H  | -1.29705 | 2.86852  | -0.43892 |
| H  | 2.20355  | -0.13925 | 1.15047  |
| H  | 1.95273  | -0.49906 | -1.86118 |
| H  | 1.54092  | -2.37545 | -0.50854 |
| H  | 4.01163  | 0.78631  | -1.20924 |
| H  | 4.32272  | -0.78118 | -1.98433 |
| H  | 5.17858  | -0.33715 | 1.88937  |
| H  | 1.98937  | 1.86847  | -1.03882 |
| H  | 3.15660  | 2.30019  | 1.15034  |
| H  | 1.87177  | 3.49622  | 0.85220  |
| H  | 1.60130  | 2.15390  | 1.99277  |
| H  | -1.87930 | -1.65717 | 0.34907  |
| H  | -5.78357 | 0.07989  | -0.12631 |
| H  | -4.72812 | 2.30686  | -0.48338 |

**1d NMR Conformer 29**

Energy: -875538.6179295

|   |          |          |          |
|---|----------|----------|----------|
| O | 0.19678  | -2.13016 | -0.88969 |
| C | 1.30296  | -1.44878 | -0.55284 |
| C | 1.28934  | -0.07428 | -0.23922 |
| C | 0.02554  | 0.66192  | -0.28447 |
| N | -1.10451 | 0.13345  | -0.58915 |
| C | -2.12847 | 1.17191  | -0.47579 |
| C | -3.14993 | 0.80109  | 0.60772  |
| O | -2.54227 | 0.71896  | 1.87832  |
| C | -3.94856 | -0.46118 | 0.23548  |
| C | -3.12824 | -1.71605 | 0.08250  |
| O | -2.46511 | -2.02686 | 1.20878  |
| O | -3.06982 | -2.39939 | -0.91422 |
| C | -1.33003 | 2.45498  | -0.13326 |

|    |          |          |          |
|----|----------|----------|----------|
| C  | -1.37170 | 3.52626  | -1.19956 |
| O  | 0.04113  | 1.97018  | 0.00466  |
| C  | 2.47586  | 0.57874  | 0.11925  |
| C  | 3.65962  | -0.13303 | 0.15690  |
| Cl | 5.14316  | 0.67706  | 0.60871  |
| C  | 3.69022  | -1.49285 | -0.16055 |
| C  | 2.51856  | -2.14245 | -0.51223 |
| H  | -0.57264 | -1.49995 | -0.88388 |
| H  | -2.65786 | 1.27540  | -1.43383 |
| H  | -3.87208 | 1.62342  | 0.68122  |
| H  | -2.03181 | -0.10557 | 1.93836  |
| H  | -4.48074 | -0.29926 | -0.70482 |
| H  | -4.68325 | -0.64118 | 1.02830  |
| H  | -1.93878 | -2.84234 | 1.06176  |
| H  | -1.61763 | 2.84588  | 0.84728  |
| H  | -2.39554 | 3.89927  | -1.30461 |
| H  | -0.72285 | 4.36411  | -0.93380 |
| H  | -1.04959 | 3.11615  | -2.16165 |
| H  | 2.45301  | 1.63698  | 0.36307  |
| H  | 4.63028  | -2.03669 | -0.12782 |
| H  | 2.52076  | -3.19993 | -0.76001 |

**1d NMR Conformer 27**

Energy: -875537.4782029

|    |          |          |          |
|----|----------|----------|----------|
| O  | 0.25228  | -2.25334 | -0.41234 |
| C  | 1.38019  | -1.54413 | -0.25357 |
| C  | 1.39599  | -0.13947 | -0.13163 |
| C  | 0.14012  | 0.60495  | -0.18521 |
| N  | -1.01483 | 0.07006  | -0.34999 |
| C  | -1.99393 | 1.15742  | -0.38557 |
| C  | -3.17930 | 0.87159  | 0.53472  |
| O  | -2.78321 | 0.47592  | 1.84539  |
| C  | -4.09918 | -0.21663 | -0.03258 |
| C  | -3.44420 | -1.57457 | -0.20123 |
| O  | -2.89313 | -2.10714 | 0.89538  |
| O  | -3.44343 | -2.19689 | -1.23969 |
| C  | -1.17667 | 2.41597  | -0.00496 |
| C  | -1.34964 | 3.59446  | -0.93420 |
| O  | 0.19707  | 1.94347  | -0.05781 |
| C  | 2.60940  | 0.54028  | 0.04109  |
| C  | 3.79027  | -0.17578 | 0.08607  |
| Cl | 5.30645  | 0.66996  | 0.29567  |
| C  | 3.79082  | -1.56791 | -0.03581 |
| C  | 2.59300  | -2.24346 | -0.20382 |
| H  | -0.52070 | -1.63725 | -0.42938 |
| H  | -2.39134 | 1.25381  | -1.40714 |
| H  | -3.77347 | 1.79371  | 0.61036  |
| H  | -1.83012 | 0.61093  | 1.99400  |
| H  | -4.49207 | 0.09275  | -1.00307 |

|   |          |          |          |
|---|----------|----------|----------|
| H | -4.94318 | -0.33635 | 0.65723  |
| H | -2.87845 | -1.44456 | 1.61456  |
| H | -1.36208 | 2.71050  | 1.03743  |
| H | -2.38980 | 3.93321  | -0.90250 |
| H | -0.70695 | 4.42430  | -0.63309 |
| H | -1.10578 | 3.30552  | -1.96029 |
| H | 2.61002  | 1.62202  | 0.13541  |
| H | 4.72796  | -2.11589 | 0.00177  |
| H | 2.57239  | -3.32491 | -0.29907 |

**1d NMR Conformer 26**

Energy: -875536.3307767

|    |          |          |          |
|----|----------|----------|----------|
| O  | 2.31241  | 2.70798  | 0.92234  |
| C  | 2.75886  | 1.47600  | 0.59685  |
| C  | 1.96957  | 0.44773  | 0.04700  |
| C  | 0.53370  | 0.59281  | -0.24699 |
| N  | -0.22542 | -0.30117 | -0.74261 |
| C  | -1.56766 | 0.27869  | -0.84993 |
| C  | -2.55408 | -0.57747 | -0.05105 |
| O  | -2.52116 | -1.91588 | -0.50495 |
| C  | -3.98420 | -0.09724 | -0.22904 |
| C  | -4.93768 | -0.84737 | 0.67131  |
| O  | -6.15359 | -0.96524 | 0.12871  |
| O  | -4.66196 | -1.26920 | 1.77299  |
| C  | -1.42706 | 1.72809  | -0.32483 |
| C  | -1.73999 | 2.80231  | -1.34419 |
| O  | -0.02226 | 1.80154  | 0.03691  |
| C  | 2.56081  | -0.79177 | -0.24595 |
| C  | 3.90219  | -1.00031 | 0.00390  |
| Cl | 4.62082  | -2.55080 | -0.36508 |
| C  | 4.69442  | 0.01324  | 0.54902  |
| C  | 4.11949  | 1.23785  | 0.84000  |
| H  | 1.36442  | 2.80243  | 0.72643  |
| H  | -1.87733 | 0.26330  | -1.90523 |
| H  | -2.27886 | -0.52632 | 1.01430  |
| H  | -1.60548 | -2.23696 | -0.43845 |
| H  | -4.29592 | -0.21154 | -1.27164 |
| H  | -4.07839 | 0.96473  | 0.03381  |
| H  | -6.74504 | -1.41904 | 0.76638  |
| H  | -1.98860 | 1.88355  | 0.60478  |
| H  | -2.79773 | 2.74804  | -1.62047 |
| H  | -1.53747 | 3.79677  | -0.94026 |
| H  | -1.13808 | 2.65172  | -2.24520 |
| H  | 1.94319  | -1.57738 | -0.67025 |
| H  | 5.74932  | -0.15949 | 0.74176  |
| H  | 4.71222  | 2.04285  | 1.26402  |

**1d NMR Conformer 25**

Energy: -875530.1720976

|    |          |          |          |
|----|----------|----------|----------|
| O  | 1.90767  | 2.91130  | -0.11593 |
| C  | 2.57816  | 1.74310  | -0.00765 |
| C  | 1.87325  | 0.52894  | -0.08375 |
| C  | 0.40915  | 0.43142  | -0.26248 |
| N  | -0.19014 | -0.61855 | -0.67688 |
| C  | -1.62105 | -0.29693 | -0.72321 |
| C  | -2.43087 | -1.43950 | -0.10376 |
| O  | -2.08570 | -2.65749 | -0.73915 |
| C  | -3.93352 | -1.27889 | -0.30480 |
| C  | -4.60163 | -0.32956 | 0.65707  |
| O  | -5.76935 | 0.11599  | 0.18197  |
| O  | -4.17122 | -0.01330 | 1.74595  |
| C  | -1.72755 | 1.06213  | -0.00185 |
| C  | -2.57017 | 2.10507  | -0.70314 |
| O  | -0.34578 | 1.50562  | 0.05177  |
| C  | 2.58059  | -0.67819 | 0.00100  |
| C  | 3.95379  | -0.67638 | 0.16724  |
| Cl | 4.81228  | -2.19544 | 0.28371  |
| C  | 4.66097  | 0.52175  | 0.24889  |
| C  | 3.96958  | 1.72013  | 0.15835  |
| H  | 2.52876  | 3.66169  | -0.07825 |
| H  | -1.92113 | -0.21173 | -1.78068 |
| H  | -2.20460 | -1.48891 | 0.97197  |
| H  | -1.11511 | -2.71876 | -0.75064 |
| H  | -4.40481 | -2.25734 | -0.14583 |
| H  | -4.16584 | -0.98370 | -1.33346 |
| H  | -6.19258 | 0.68717  | 0.85824  |
| H  | -2.04817 | 0.92919  | 1.03783  |
| H  | -3.61065 | 1.76924  | -0.76566 |
| H  | -2.55023 | 3.05293  | -0.16060 |
| H  | -2.20012 | 2.26732  | -1.71951 |
| H  | 2.02987  | -1.61138 | -0.06122 |
| H  | 5.73900  | 0.51769  | 0.38088  |
| H  | 4.50873  | 2.66339  | 0.21363  |

**1d NMR Conformer 24**

Energy: -875534.0879638

|   |          |          |          |
|---|----------|----------|----------|
| O | -1.89752 | 2.46138  | -1.37490 |
| C | -2.59790 | 1.40563  | -0.90597 |
| C | -1.93856 | 0.43789  | -0.12848 |
| C | -0.51028 | 0.52518  | 0.23646  |
| N | 0.23229  | -0.48642 | 0.47812  |
| C | 1.54774  | 0.03555  | 0.85649  |
| C | 2.60682  | -0.53781 | -0.08416 |
| O | 2.55525  | -1.96026 | -0.05541 |
| C | 4.01777  | -0.14457 | 0.33973  |
| C | 5.11860  | -0.61963 | -0.59479 |
| O | 4.96587  | -1.82448 | -1.14877 |
| O | 6.11442  | 0.03255  | -0.81769 |

|    |          |          |          |   |          |          |          |
|----|----------|----------|----------|---|----------|----------|----------|
| C  | 1.40476  | 1.57468  | 0.77677  | H | 4.52812  | -1.99431 | -0.85366 |
| C  | 1.64592  | 2.29597  | 2.08638  | H | 4.06542  | -1.65366 | 0.80816  |
| O  | 0.02549  | 1.75577  | 0.37502  | H | 6.23084  | 0.94588  | 0.30935  |
| C  | -2.64804 | -0.68132 | 0.32331  | H | 2.15390  | 1.33148  | -0.23842 |
| C  | -3.99071 | -0.82559 | 0.01803  | H | 3.41525  | 0.88281  | 1.90738  |
| Cl | -4.86376 | -2.22321 | 0.60078  | H | 2.37138  | 2.30817  | 2.03941  |
| C  | -4.65581 | 0.13362  | -0.74278 | H | 1.86600  | 0.76167  | 2.76303  |
| C  | -3.95611 | 1.24015  | -1.20210 | H | -2.30022 | -1.57354 | 0.58317  |
| H  | -2.46847 | 3.03221  | -1.92143 | H | -5.70493 | 0.82708  | -0.48230 |
| H  | 1.78889  | -0.29664 | 1.87746  | H | -4.19433 | 2.72591  | -0.99614 |
| H  | 2.40007  | -0.17821 | -1.10514 |   |          |          |          |
| H  | 1.66978  | -2.25210 | -0.34041 |   |          |          |          |
| H  | 4.21830  | -0.57661 | 1.33008  |   |          |          |          |
| H  | 4.11887  | 0.94052  | 0.42079  |   |          |          |          |
| H  | 4.10889  | -2.22405 | -0.87837 |   |          |          |          |
| H  | 2.01901  | 2.00237  | -0.02650 |   |          |          |          |
| H  | 2.68904  | 2.16832  | 2.39275  |   |          |          |          |
| H  | 1.44103  | 3.36420  | 1.98592  |   |          |          |          |
| H  | 1.00141  | 1.88105  | 2.86717  |   |          |          |          |
| H  | -2.13033 | -1.42570 | 0.92057  |   |          |          |          |
| H  | -5.71019 | 0.01561  | -0.97586 |   |          |          |          |
| H  | -4.46152 | 1.99034  | -1.80637 |   |          |          |          |

**1d NMR Conformer 23**

Energy: -875530.5521173

|    |          |          |          |
|----|----------|----------|----------|
| O  | -1.55308 | 2.66258  | -0.79243 |
| C  | -2.39940 | 1.65435  | -0.48598 |
| C  | -1.86519 | 0.43767  | -0.03150 |
| C  | -0.41674 | 0.22412  | 0.15979  |
| N  | 0.18475  | -0.88179 | -0.05507 |
| C  | 1.57629  | -0.69147 | 0.37287  |
| C  | 2.52828  | -1.26330 | -0.68196 |
| O  | 2.18693  | -2.61351 | -0.94266 |
| C  | 3.98066  | -1.28518 | -0.21960 |
| C  | 4.70026  | 0.03330  | -0.34595 |
| O  | 5.76509  | 0.09621  | 0.46020  |
| O  | 4.39225  | 0.93252  | -1.09831 |
| C  | 1.69307  | 0.82785  | 0.61956  |
| C  | 2.37430  | 1.22322  | 1.91156  |
| O  | 0.30576  | 1.25449  | 0.64951  |
| C  | -2.72186 | -0.63393 | 0.23873  |
| C  | -4.08970 | -0.48732 | 0.07544  |
| Cl | -5.14877 | -1.83288 | 0.42534  |
| C  | -4.63089 | 0.71976  | -0.36048 |
| C  | -3.78388 | 1.78293  | -0.64208 |
| H  | -2.04761 | 3.42754  | -1.13810 |
| H  | 1.73169  | -1.26008 | 1.30452  |
| H  | 2.44126  | -0.66116 | -1.59870 |
| H  | 1.23230  | -2.64666 | -1.12575 |

**1d NMR Conformer 22**

Energy: -875532.5550836

|    |          |          |          |
|----|----------|----------|----------|
| O  | 2.22889  | -2.65677 | -0.74571 |
| C  | 2.68063  | -1.42096 | -0.43764 |
| C  | 1.76459  | -0.45238 | 0.00564  |
| C  | 0.32157  | -0.72354 | 0.17473  |
| N  | -0.59521 | 0.14960  | 0.00329  |
| C  | -1.86583 | -0.50233 | 0.33797  |
| C  | -2.83896 | -0.40507 | -0.84391 |
| O  | -2.25727 | -0.95471 | -2.01191 |
| C  | -3.29653 | 1.02978  | -1.09387 |
| C  | -4.21895 | 1.55396  | -0.02448 |
| O  | -4.46624 | 2.85920  | -0.17493 |
| O  | -4.70190 | 0.89231  | 0.86963  |
| C  | -1.48662 | -1.96156 | 0.67621  |
| C  | -1.92437 | -2.42678 | 2.04773  |
| O  | -0.03770 | -1.95164 | 0.60354  |
| C  | 2.21408  | 0.84319  | 0.28242  |
| C  | 3.55340  | 1.16205  | 0.13410  |
| Cl | 4.09999  | 2.78273  | 0.49583  |
| C  | 4.47126  | 0.20594  | -0.29492 |
| C  | 4.03018  | -1.07798 | -0.58159 |
| H  | 2.95933  | -3.21029 | -1.07784 |
| H  | -2.31548 | -0.00071 | 1.20563  |
| H  | -3.71358 | -1.02841 | -0.62502 |
| H  | -1.44888 | -0.45365 | -2.22239 |
| H  | -3.84337 | 1.07585  | -2.04308 |
| H  | -2.43690 | 1.70375  | -1.18461 |
| H  | -5.08592 | 3.14984  | 0.52738  |
| H  | -1.83382 | -2.64734 | -0.10581 |
| H  | -3.01760 | -2.42178 | 2.10324  |
| H  | -1.57140 | -3.44115 | 2.24933  |
| H  | -1.53365 | -1.75424 | 2.81741  |
| H  | 1.49899  | 1.58797  | 0.61875  |
| H  | 5.52071  | 0.46364  | -0.40598 |
| H  | 4.73535  | -1.83021 | -0.92848 |

**1d NMR Conformer 21**

Energy: -875537.2831227

|    |          |          |          |
|----|----------|----------|----------|
| O  | 0.26303  | -2.13781 | -1.00866 |
| C  | 1.34018  | -1.45631 | -0.58702 |
| C  | 1.28899  | -0.09215 | -0.25262 |
| C  | 0.02167  | 0.63232  | -0.30465 |
| N  | -1.11244 | 0.10320  | -0.59868 |
| C  | -2.11576 | 1.16438  | -0.52993 |
| C  | -3.22928 | 0.80239  | 0.45912  |
| O  | -2.75768 | 0.77595  | 1.79064  |
| C  | -3.90576 | -0.51352 | 0.05294  |
| C  | -3.04344 | -1.71360 | 0.33934  |
| O  | -2.70522 | -2.39412 | -0.75306 |
| O  | -2.67461 | -2.04304 | 1.45021  |
| C  | -1.31548 | 2.42499  | -0.12522 |
| C  | -1.35794 | 3.55097  | -1.13163 |
| O  | 0.05276  | 1.94201  | -0.01754 |
| C  | 2.45176  | 0.58209  | 0.13463  |
| C  | 3.64710  | -0.10704 | 0.19577  |
| Cl | 5.10394  | 0.72755  | 0.67897  |
| C  | 3.70818  | -1.46493 | -0.12012 |
| C  | 2.55914  | -2.13274 | -0.50932 |
| H  | -0.49491 | -1.50864 | -1.05765 |
| H  | -2.58056 | 1.29548  | -1.51739 |
| H  | -3.99319 | 1.58693  | 0.41439  |
| H  | -2.40191 | -0.10527 | 1.99161  |
| H  | -4.16085 | -0.49441 | -1.00988 |
| H  | -4.82770 | -0.63122 | 0.63032  |
| H  | -2.16328 | -3.16660 | -0.49598 |
| H  | -1.60494 | 2.76792  | 0.87150  |
| H  | -2.38216 | 3.92679  | -1.22303 |
| H  | -0.71485 | 4.37522  | -0.81474 |
| H  | -1.02771 | 3.19781  | -2.11276 |
| H  | 2.40478  | 1.63702  | 0.38937  |
| H  | 4.65653  | -1.99110 | -0.06639 |
| H  | 2.58850  | -3.18578 | -0.77138 |

**1d NMR Conformer 20**

Energy: -875538.7888003

|   |          |          |          |
|---|----------|----------|----------|
| O | 0.59304  | -2.40651 | -0.53628 |
| C | 1.68663  | -1.65175 | -0.34558 |
| C | 1.62535  | -0.25538 | -0.15443 |
| C | 0.32409  | 0.41303  | -0.15837 |
| N | -0.79644 | -0.18809 | -0.33895 |
| C | -1.85611 | 0.81733  | -0.21957 |
| C | -2.73145 | 0.51313  | 1.00346  |
| O | -1.95377 | 0.51641  | 2.18467  |
| C | -3.48715 | -0.80684 | 0.86269  |
| C | -4.57848 | -0.76241 | -0.18404 |

|    |          |          |          |
|----|----------|----------|----------|
| O  | -5.19739 | -1.92056 | -0.45419 |
| O  | -4.92652 | 0.24364  | -0.75910 |
| C  | -1.09174 | 2.15708  | -0.08775 |
| C  | -1.22541 | 3.06614  | -1.29103 |
| O  | 0.29729  | 1.73994  | 0.03893  |
| C  | 2.80134  | 0.48180  | 0.03833  |
| C  | 4.02048  | -0.17043 | 0.04066  |
| Cl | 5.49082  | 0.74675  | 0.27749  |
| C  | 4.09654  | -1.55319 | -0.14605 |
| C  | 2.93575  | -2.28594 | -0.33755 |
| H  | -0.20564 | -1.81632 | -0.52624 |
| H  | -2.48459 | 0.80634  | -1.11754 |
| H  | -3.45297 | 1.33047  | 1.11416  |
| H  | -1.29912 | -0.20357 | 2.13825  |
| H  | -3.95847 | -1.05075 | 1.82301  |
| H  | -2.79140 | -1.62331 | 0.62877  |
| H  | -4.83668 | -2.67269 | 0.05439  |
| H  | -1.34352 | 2.67411  | 0.84301  |
| H  | -2.26491 | 3.39376  | -1.38721 |
| H  | -0.58984 | 3.94819  | -1.18509 |
| H  | -0.94301 | 2.53086  | -2.20296 |
| H  | 2.74379  | 1.55635  | 0.18320  |
| H  | 5.06290  | -2.04938 | -0.14169 |
| H  | 2.97415  | -3.36097 | -0.48556 |

**1d NMR Conformer 19**

Energy: -875538.5023172

|    |          |          |          |
|----|----------|----------|----------|
| O  | -1.25901 | 2.57279  | -0.66481 |
| C  | -2.18671 | 1.63897  | -0.40081 |
| C  | -1.86019 | 0.29704  | -0.11448 |
| C  | -0.45709 | -0.11773 | -0.10374 |
| N  | 0.53324  | 0.66487  | -0.33402 |
| C  | 1.76208  | -0.12621 | -0.20238 |
| C  | 2.60488  | 0.45316  | 0.94130  |
| O  | 2.92906  | 1.80264  | 0.67798  |
| C  | 3.93155  | -0.27403 | 1.18862  |
| C  | 4.94427  | -0.04724 | 0.09213  |
| O  | 4.62690  | -0.69543 | -1.03817 |
| O  | 5.94326  | 0.62720  | 0.20131  |
| C  | 1.25754  | -1.56761 | 0.04960  |
| C  | 1.57081  | -2.52923 | -1.07680 |
| O  | -0.18560 | -1.40609 | 0.16260  |
| C  | -2.87446 | -0.63215 | 0.15390  |
| C  | -4.19475 | -0.22258 | 0.13790  |
| Cl | -5.46333 | -1.37864 | 0.47514  |
| C  | -4.53265 | 1.10338  | -0.14486 |
| C  | -3.53306 | 2.02487  | -0.41271 |
| H  | -0.36176 | 2.15149  | -0.62370 |
| H  | 2.33392  | -0.06018 | -1.13368 |

|   |          |          |          |
|---|----------|----------|----------|
| H | 2.00801  | 0.36965  | 1.86420  |
| H | 2.10334  | 2.30818  | 0.58151  |
| H | 3.75892  | -1.35032 | 1.29666  |
| H | 4.36826  | 0.10506  | 2.11372  |
| H | 5.31004  | -0.50913 | -1.71706 |
| H | 1.58945  | -1.96528 | 1.01546  |
| H | 2.65569  | -2.64338 | -1.16080 |
| H | 1.12173  | -3.50782 | -0.89288 |
| H | 1.19065  | -2.13281 | -2.02358 |
| H | -2.61401 | -1.66347 | 0.37205  |
| H | -5.57538 | 1.40806  | -0.15376 |
| H | -3.77498 | 3.06001  | -0.63463 |

**1d NMR Conformer 18**

Energy: -875540.8857989

|    |          |          |          |
|----|----------|----------|----------|
| O  | -1.37394 | 2.53874  | -0.86935 |
| C  | -2.26045 | 1.62744  | -0.43665 |
| C  | -1.91482 | 0.28204  | -0.19301 |
| C  | -0.53821 | -0.15914 | -0.41532 |
| N  | 0.41373  | 0.60234  | -0.81475 |
| C  | 1.62786  | -0.21366 | -0.89243 |
| C  | 2.69347  | 0.35227  | 0.05167  |
| O  | 2.96075  | 1.70602  | -0.25605 |
| C  | 4.01231  | -0.38631 | -0.09632 |
| C  | 5.01697  | 0.05149  | 0.94303  |
| O  | 6.27369  | -0.05207 | 0.49967  |
| O  | 4.73915  | 0.42463  | 2.06125  |
| C  | 1.15235  | -1.63993 | -0.51561 |
| C  | 1.27492  | -2.65366 | -1.63341 |
| O  | -0.25201 | -1.45281 | -0.19104 |
| C  | -2.88491 | -0.62419 | 0.25584  |
| C  | -4.18148 | -0.18880 | 0.45885  |
| Cl | -5.39448 | -1.31763 | 1.01717  |
| C  | -4.53770 | 1.14125  | 0.22170  |
| C  | -3.58147 | 2.04046  | -0.22326 |
| H  | -0.49102 | 2.10074  | -0.97619 |
| H  | 2.02113  | -0.17685 | -1.91850 |
| H  | 2.33173  | 0.25830  | 1.08739  |
| H  | 2.14862  | 2.22312  | -0.11755 |
| H  | 4.42609  | -0.22368 | -1.09599 |
| H  | 3.87719  | -1.46829 | 0.03538  |
| H  | 6.88856  | 0.20221  | 1.22068  |
| H  | 1.62911  | -2.00173 | 0.40364  |
| H  | 2.33111  | -2.80739 | -1.87630 |
| H  | 0.84168  | -3.61222 | -1.33926 |
| H  | 0.76235  | -2.28912 | -2.52885 |
| H  | -2.60989 | -1.65842 | 0.43978  |
| H  | -5.56114 | 1.46721  | 0.38525  |
| H  | -3.83961 | 3.07781  | -0.41432 |

**1d NMR Conformer 17**

Energy: -875537.6474234

|    |          |          |          |
|----|----------|----------|----------|
| O  | 2.56356  | 2.58170  | 0.90310  |
| C  | 2.79767  | 1.30066  | 0.54755  |
| C  | 1.84055  | 0.42834  | -0.00410 |
| C  | 0.44514  | 0.81844  | -0.26044 |
| N  | -0.49700 | 0.03543  | -0.61510 |
| C  | -1.69553 | 0.86027  | -0.78487 |
| C  | -2.86061 | 0.27269  | 0.01208  |
| O  | -2.52647 | 0.18318  | 1.39556  |
| C  | -3.28355 | -1.09363 | -0.53389 |
| C  | -4.49757 | -1.69523 | 0.15310  |
| O  | -4.64238 | -1.45243 | 1.45903  |
| O  | -5.30570 | -2.38480 | -0.42828 |
| C  | -1.28879 | 2.27203  | -0.30423 |
| C  | -1.56204 | 3.38643  | -1.28824 |
| O  | 0.14579  | 2.13523  | -0.10795 |
| C  | 2.20906  | -0.88790 | -0.32448 |
| C  | 3.49987  | -1.32089 | -0.10009 |
| Cl | 3.94617  | -2.96073 | -0.50834 |
| C  | 4.45784  | -0.46326 | 0.44741  |
| C  | 4.10191  | 0.83490  | 0.76649  |
| H  | 1.64705  | 2.84153  | 0.70626  |
| H  | -1.97766 | 0.87231  | -1.84792 |
| H  | -3.70601 | 0.97166  | -0.03492 |
| H  | -1.68416 | -0.30545 | 1.48783  |
| H  | -2.44955 | -1.79841 | -0.41697 |
| H  | -3.51132 | -1.03060 | -1.60085 |
| H  | -3.91409 | -0.87924 | 1.78770  |
| H  | -1.71699 | 2.49032  | 0.68092  |
| H  | -2.64124 | 3.47154  | -1.44949 |
| H  | -1.19436 | 4.34257  | -0.90906 |
| H  | -1.08109 | 3.17231  | -2.24691 |
| H  | 1.46320  | -1.55098 | -0.75194 |
| H  | 5.47142  | -0.81420 | 0.61887  |
| H  | 4.82669  | 1.52090  | 1.19459  |

**1d NMR Conformer 16**

Energy: -875534.1286201

|   |          |          |          |
|---|----------|----------|----------|
| O | -2.28894 | 2.83355  | -0.47044 |
| C | -2.74202 | 1.57845  | -0.26352 |
| C | -1.92814 | 0.45367  | -0.03143 |
| C | -0.45699 | 0.51163  | 0.01474  |
| N | 0.32866  | -0.47780 | 0.17014  |
| C | 1.69877  | 0.04907  | 0.15822  |
| C | 2.49362  | -0.66749 | -0.93847 |
| O | 2.50146  | -2.06108 | -0.70437 |
| C | 3.95695  | -0.22835 | -1.04185 |

|    |          |          |          |   |          |          |          |
|----|----------|----------|----------|---|----------|----------|----------|
| C  | 4.73860  | -0.59056 | 0.19850  | H | 2.54850  | -0.31708 | -1.13067 |
| O  | 5.61815  | -1.57293 | -0.00832 | H | 3.67165  | -0.70241 | 1.05560  |
| O  | 4.59507  | -0.05041 | 1.27621  | H | 1.20853  | 0.09837  | 2.20211  |
| C  | 1.54722  | 1.57103  | -0.06857 | H | 3.67815  | 1.62173  | 1.86646  |
| C  | 2.12878  | 2.42877  | 1.03319  | H | 2.19165  | 1.98634  | 0.96190  |
| O  | 0.10321  | 1.74456  | -0.11478 | H | 5.46172  | 1.23650  | -1.21566 |
| C  | -2.52721 | -0.80064 | 0.16695  | H | 2.02700  | -2.56094 | 0.68097  |
| C  | -3.90097 | -0.92863 | 0.13372  | H | 3.01830  | -2.83104 | -1.62110 |
| Cl | -4.63111 | -2.49756 | 0.38546  | H | 1.56592  | -3.83511 | -1.43675 |
| C  | -4.71828 | 0.18111  | -0.09637 | H | 1.48029  | -2.30049 | -2.33561 |
| C  | -4.13550 | 1.42057  | -0.29247 | H | -1.35751 | 1.61499  | -0.27461 |
| H  | -1.31752 | 2.86795  | -0.42637 | H | -5.46387 | 0.39455  | 0.10770  |
| H  | 2.16902  | -0.16197 | 1.12599  | H | -4.72187 | -1.97631 | 0.27816  |
| H  | 2.00897  | -0.44027 | -1.90188 |   |          |          |          |
| H  | 1.58085  | -2.35316 | -0.58601 |   |          |          |          |
| H  | 4.01412  | 0.85743  | -1.17071 |   |          |          |          |
| H  | 4.40688  | -0.70764 | -1.91316 |   |          |          |          |
| H  | 6.08371  | -1.76443 | 0.83362  |   |          |          |          |
| H  | 1.91876  | 1.88003  | -1.05357 |   |          |          |          |
| H  | 3.20829  | 2.25932  | 1.08732  |   |          |          |          |
| H  | 1.93970  | 3.48885  | 0.84936  |   |          |          |          |
| H  | 1.69005  | 2.14672  | 1.99505  |   |          |          |          |
| H  | -1.88990 | -1.66089 | 0.34722  |   |          |          |          |
| H  | -5.79854 | 0.07004  | -0.11975 |   |          |          |          |
| H  | -4.74674 | 2.29972  | -0.47325 |   |          |          |          |

**1d NMR Conformer 15**

Energy: -875534.9461645

|    |          |          |          |
|----|----------|----------|----------|
| O  | -2.35877 | -2.83392 | 0.20278  |
| C  | -2.63854 | -1.51739 | 0.09874  |
| C  | -1.68070 | -0.49787 | -0.05802 |
| C  | -0.23077 | -0.74834 | -0.12817 |
| N  | 0.67410  | 0.13576  | -0.28299 |
| C  | 1.96377  | -0.55868 | -0.23226 |
| C  | 2.74969  | -0.11204 | 1.00887  |
| O  | 2.03482  | -0.41748 | 2.18940  |
| C  | 3.10035  | 1.37985  | 0.96707  |
| C  | 3.92589  | 1.77307  | -0.23099 |
| O  | 4.94984  | 0.93357  | -0.43594 |
| O  | 3.71552  | 2.73606  | -0.93581 |
| C  | 1.60960  | -2.06384 | -0.19961 |
| C  | 1.93382  | -2.80735 | -1.47808 |
| O  | 0.16741  | -2.04312 | -0.01446 |
| C  | -2.10536 | 0.83724  | -0.15397 |
| C  | -3.44920 | 1.14597  | -0.09445 |
| Cl | -3.96058 | 2.81390  | -0.21537 |
| C  | -4.40848 | 0.14184  | 0.06159  |
| C  | -3.99794 | -1.17608 | 0.15664  |
| H  | -1.40075 | -2.99489 | 0.15171  |

**1d NMR Conformer 14**

Energy: -875533.0743414

|    |          |          |          |
|----|----------|----------|----------|
| O  | -2.05570 | 2.72625  | -0.76424 |
| C  | -2.67631 | 1.57362  | -0.42902 |
| C  | -1.89615 | 0.46497  | -0.06128 |
| C  | -0.42202 | 0.50997  | 0.00671  |
| N  | 0.34078  | -0.47864 | -0.26299 |
| C  | 1.70935  | -0.03938 | 0.02108  |
| C  | 2.59848  | -0.31500 | -1.19096 |
| O  | 2.56717  | -1.69897 | -1.51909 |
| C  | 4.06081  | 0.05525  | -0.94683 |
| C  | 4.69557  | -0.65185 | 0.23916  |
| O  | 4.46697  | -1.96382 | 0.34476  |
| O  | 5.39958  | -0.08733 | 1.04747  |
| C  | 1.58336  | 1.45920  | 0.37253  |
| C  | 2.21987  | 1.86100  | 1.68521  |
| O  | 0.14793  | 1.65359  | 0.44174  |
| C  | -2.52112 | -0.74992 | 0.24100  |
| C  | -3.90172 | -0.85097 | 0.19282  |
| Cl | -4.66968 | -2.37124 | 0.58623  |
| C  | -4.68583 | 0.24563  | -0.15851 |
| C  | -4.06978 | 1.44993  | -0.47037 |
| H  | -2.70693 | 3.39845  | -1.03468 |
| H  | 2.09192  | -0.61914 | 0.87697  |
| H  | 2.22351  | 0.27658  | -2.03850 |
| H  | 1.63977  | -1.99906 | -1.53246 |
| H  | 4.16899  | 1.13115  | -0.79060 |
| H  | 4.63755  | -0.21083 | -1.84102 |
| H  | 3.82271  | -2.25461 | -0.33749 |
| H  | 1.94243  | 2.09388  | -0.44937 |
| H  | 3.30144  | 1.69626  | 1.63612  |
| H  | 2.03757  | 2.91610  | 1.90086  |
| H  | 1.81398  | 1.25477  | 2.50023  |
| H  | -1.90978 | -1.60295 | 0.51936  |
| H  | -5.76799 | 0.15897  | -0.19067 |



H -4.67074 2.30963 -0.75803

**1d NMR Conformer 13**

Energy: -875538.6297079

O -1.27262 2.58949 -0.61267  
C -2.20087 1.64951 -0.37113  
C -1.87326 0.30442 -0.10245  
C -0.46926 -0.10666 -0.08266  
N 0.52287 0.68370 -0.27395  
C 1.74911 -0.11410 -0.17034  
C 2.62883 0.45550 0.94850  
O 2.96788 1.79935 0.67188  
C 3.94793 -0.29861 1.14362  
C 4.84303 -0.18060 -0.06702  
O 5.89290 0.61699 0.13647  
O 4.64119 -0.74985 -1.12014  
C 1.24553 -1.55399 0.09673  
C 1.61757 -2.54750 -0.98208  
O -0.20099 -1.40348 0.14461  
C -2.88748 -0.63192 0.13911  
C -4.20914 -0.22641 0.11441  
Cl -5.47712 -1.39205 0.41682  
C -4.54770 1.10298 -0.15028  
C -3.54787 2.03185 -0.39159  
H -0.37533 2.16993 -0.57123  
H 2.29908 -0.05343 -1.11638  
H 2.06015 0.38361 1.88967  
H 2.14687 2.31158 0.57012  
H 3.74917 -1.36167 1.31221  
H 4.45693 0.10785 2.01927  
H 6.42323 0.65980 -0.68787  
H 1.54178 -1.91593 1.08879  
H 2.70722 -2.63369 -1.02945  
H 1.18646 -3.52994 -0.77635  
H 1.25843 -2.19447 -1.95378  
H -2.62642 -1.66584 0.34388  
H -5.59116 1.40499 -0.16678  
H -3.79096 3.06941 -0.60045

**1d NMR Conformer 12**

Energy: -875542.2180768

O 0.69343 -2.28938 -0.99481  
C 1.77229 -1.60543 -0.58150  
C 1.72245 -0.24237 -0.22598  
C 0.45525 0.48015 -0.32008  
N -0.65286 -0.05136 -0.69546  
C -1.66614 1.00491 -0.69271  
C -2.86897 0.58612 0.15227  
O -2.46567 0.29208 1.48731

C -3.60744 -0.60270 -0.46942  
C -4.87637 -1.00130 0.26474  
O -4.87840 -0.86774 1.59363  
O -5.85247 -1.43884 -0.30241  
C -0.92837 2.24315 -0.12867  
C -0.98252 3.46954 -1.01129  
O 0.44925 1.78667 -0.01502  
C 2.88237 0.41762 0.20297  
C 4.07437 -0.27858 0.27322  
Cl 5.52511 0.54128 0.80226  
C 4.13856 -1.62983 -0.07759  
C 2.99404 -2.28540 -0.50173  
H -0.08854 -1.68100 -1.00158  
H -2.01215 1.18290 -1.72100  
H -3.54902 1.44343 0.24047  
H -1.75518 -0.38012 1.46556  
H -2.94116 -1.47584 -0.47979  
H -3.88379 -0.38930 -1.50510  
H -4.02030 -0.50381 1.90540  
H -1.26365 2.46667 0.89037  
H -2.01946 3.80716 -1.10461  
H -0.39191 4.28275 -0.58373  
H -0.59974 3.23592 -2.00895  
H 2.83445 1.46829 0.47297  
H 5.08377 -2.16181 -0.01715  
H 3.02362 -3.33508 -0.77813

**1d NMR Conformer 11**

Energy: -875533.2600968

O -1.61356 2.84928 -0.56321  
C -2.31500 1.71129 -0.37460  
C -1.76404 0.47530 0.01317  
C -0.32800 0.27010 0.26407  
N 0.22551 -0.82590 0.60382  
C 1.66901 -0.57607 0.69578  
C 2.38534 -1.43707 -0.35704  
O 1.96568 -2.78162 -0.24933  
C 3.90439 -1.47119 -0.16048  
C 4.58163 -0.15112 -0.42069  
O 4.52088 0.20203 -1.71027  
O 5.11311 0.53560 0.42572  
C 1.81918 0.95356 0.50027  
C 2.22403 1.70102 1.75291  
O 0.47408 1.35597 0.11559  
C -2.60810 -0.63558 0.17482  
C -3.96490 -0.51587 -0.04550  
Cl -5.00269 -1.90736 0.16492  
C -4.52243 0.70579 -0.43288  
C -3.69754 1.80458 -0.59409

|   |          |          |          |
|---|----------|----------|----------|
| H | -0.66717 | 2.71446  | -0.38343 |
| H | 2.02370  | -0.88473 | 1.68915  |
| H | 2.14679  | -1.03764 | -1.35632 |
| H | 0.99351  | -2.79064 | -0.21250 |
| H | 4.30851  | -2.20967 | -0.86009 |
| H | 4.13485  | -1.78354 | 0.86072  |
| H | 4.96810  | 1.06705  | -1.82931 |
| H | 2.45720  | 1.21776  | -0.34894 |
| H | 3.24243  | 1.41369  | 2.02882  |
| H | 2.19681  | 2.78037  | 1.58666  |
| H | 1.54751  | 1.44879  | 2.57542  |
| H | -2.17190 | -1.58327 | 0.47536  |
| H | -5.59171 | 0.78964  | -0.60438 |
| H | -4.10411 | 2.76579  | -0.89398 |

**1d NMR Conformer 10**

Energy: -875539.6733314

|    |          |          |          |
|----|----------|----------|----------|
| O  | 0.66625  | -2.47141 | -0.31789 |
| C  | 1.73471  | -1.66395 | -0.21341 |
| C  | 1.62670  | -0.26134 | -0.12127 |
| C  | 0.30514  | 0.36663  | -0.13174 |
| N  | -0.80521 | -0.27513 | -0.20634 |
| C  | -1.88724 | 0.70877  | -0.15934 |
| C  | -2.79161 | 0.44691  | 1.05101  |
| O  | -2.04056 | 0.49509  | 2.24663  |
| C  | -3.53716 | -0.88685 | 0.93095  |
| C  | -4.42749 | -0.97249 | -0.28067 |
| O  | -5.14556 | 0.14490  | -0.45339 |
| O  | -4.50376 | -1.92272 | -1.02605 |
| C  | -1.16234 | 2.07449  | -0.07103 |
| C  | -1.43344 | 3.00567  | -1.23273 |
| O  | 0.24606  | 1.70551  | -0.06177 |
| C  | 2.78002  | 0.52758  | -0.01651 |
| C  | 4.02246  | -0.07867 | -0.00441 |
| Cl | 5.46267  | 0.90289  | 0.12762  |
| C  | 4.14274  | -1.46679 | -0.09693 |
| C  | 3.00518  | -2.25050 | -0.20137 |
| H  | -0.15662 | -1.91573 | -0.32278 |
| H  | -2.48583 | 0.64230  | -1.08034 |
| H  | -3.51548 | 1.26549  | 1.12578  |
| H  | -1.40995 | -0.24774 | 2.25749  |
| H  | -4.16765 | -1.01219 | 1.81913  |
| H  | -2.83179 | -1.72157 | 0.88741  |
| H  | -5.71805 | 0.04053  | -1.24343 |
| H  | -1.35951 | 2.56194  | 0.89020  |
| H  | -2.49257 | 3.28206  | -1.24114 |
| H  | -0.83732 | 3.91762  | -1.14833 |
| H  | -1.19421 | 2.50944  | -2.17848 |
| H  | 2.68831  | 1.60740  | 0.05535  |

|   |         |          |          |
|---|---------|----------|----------|
| H | 5.12642 | -1.92876 | -0.08661 |
| H | 3.07992 | -3.33155 | -0.27483 |

**1d NMR Conformer 9**

Energy: -875537.6349924

|    |          |          |          |
|----|----------|----------|----------|
| O  | 1.59354  | 2.73708  | 0.42169  |
| C  | 2.33334  | 1.63869  | 0.20189  |
| C  | 1.77972  | 0.34343  | 0.13964  |
| C  | 0.33964  | 0.16373  | 0.31942  |
| N  | -0.49335 | 1.11844  | 0.52654  |
| C  | -1.83313 | 0.52600  | 0.61149  |
| C  | -2.69238 | 1.04569  | -0.55319 |
| O  | -2.64686 | 2.45637  | -0.60452 |
| C  | -4.17693 | 0.70454  | -0.38505 |
| C  | -4.47869 | -0.76803 | -0.47563 |
| O  | -4.28313 | -1.24739 | -1.70926 |
| O  | -4.84213 | -1.46096 | 0.45045  |
| C  | -1.56288 | -1.00143 | 0.59460  |
| C  | -1.80703 | -1.68225 | 1.92479  |
| O  | -0.14578 | -1.08638 | 0.26885  |
| C  | 2.60604  | -0.76543 | -0.08916 |
| C  | 3.96516  | -0.57834 | -0.25665 |
| Cl | 4.99898  | -1.95931 | -0.54453 |
| C  | 4.52727  | 0.69972  | -0.19905 |
| C  | 3.71425  | 1.79815  | 0.02947  |
| H  | 0.64598  | 2.46895  | 0.53043  |
| H  | -2.30605 | 0.83667  | 1.55328  |
| H  | -2.31144 | 0.61171  | -1.49195 |
| H  | -1.71551 | 2.73406  | -0.64882 |
| H  | -4.72225 | 1.21830  | -1.18275 |
| H  | -4.52883 | 1.07161  | 0.58200  |
| H  | -4.48497 | -2.20764 | -1.71876 |
| H  | -2.08030 | -1.51826 | -0.21952 |
| H  | -2.87530 | -1.64729 | 2.15571  |
| H  | -1.48844 | -2.72646 | 1.88805  |
| H  | -1.25392 | -1.16785 | 2.71702  |
| H  | 2.17094  | -1.75936 | -0.13262 |
| H  | 5.59768  | 0.82866  | -0.33271 |
| H  | 4.13170  | 2.79941  | 0.07869  |

**1d NMR Conformer 8**

Energy: -875537.2548032

|   |          |          |          |
|---|----------|----------|----------|
| O | -2.29425 | 2.72922  | -0.91122 |
| C | -2.74464 | 1.49563  | -0.59796 |
| C | -1.95975 | 0.45962  | -0.05684 |
| C | -0.52458 | 0.59835  | 0.24078  |
| N | 0.23743  | -0.31390 | 0.69962  |
| C | 1.57369  | 0.26942  | 0.84073  |
| C | 2.57336  | -0.55884 | 0.03272  |

|    |          |          |          |   |          |          |          |
|----|----------|----------|----------|---|----------|----------|----------|
| O  | 2.54711  | -1.91012 | 0.47567  | C | 3.55869  | 2.04918  | 0.19765  |
| C  | 4.00306  | -0.06426 | 0.22513  | H | 0.46952  | 2.09964  | 0.95351  |
| C  | 5.04368  | -0.78967 | -0.61290 | H | -2.03033 | -0.19697 | 1.90546  |
| O  | 4.88056  | -2.10421 | -0.77909 | H | -2.34002 | 0.20767  | -1.10233 |
| O  | 6.00344  | -0.22803 | -1.09253 | H | -2.18244 | 2.20187  | 0.04963  |
| C  | 1.43592  | 1.73187  | 0.35292  | H | -4.39991 | -0.26589 | 1.11709  |
| C  | 1.76229  | 2.77964  | 1.39509  | H | -3.88790 | -1.52656 | -0.01846 |
| O  | 0.02763  | 1.81857  | 0.00764  | H | -4.49555 | 1.76996  | -0.70481 |
| C  | -2.55490 | -0.78122 | 0.22318  | H | -1.61803 | -2.04514 | -0.39597 |
| C  | -3.89621 | -0.98284 | -0.03147 | H | -2.31065 | -2.83400 | 1.89100  |
| Cl | -4.62182 | -2.53310 | 0.32244  | H | -0.81036 | -3.62557 | 1.36482  |
| C  | -4.68408 | 0.03869  | -0.56867 | H | -0.74923 | -2.28843 | 2.53980  |
| C  | -4.10551 | 1.26431  | -0.84668 | H | 2.61135  | -1.66069 | -0.43950 |
| H  | -1.34843 | 2.82363  | -0.70612 | H | 5.54228  | 1.48425  | -0.40513 |
| H  | 1.87431  | 0.22594  | 1.89812  | H | 3.81000  | 3.08932  | 0.38241  |
| H  | 2.29158  | -0.50822 | -1.03144 |   |          |          |          |
| H  | 1.65107  | -2.27133 | 0.34533  |   |          |          |          |
| H  | 4.27942  | -0.19494 | 1.28055  |   |          |          |          |
| H  | 4.08968  | 0.99812  | -0.01592 |   |          |          |          |
| H  | 4.05816  | -2.41225 | -0.33864 |   |          |          |          |
| H  | 1.98921  | 1.90852  | -0.57800 |   |          |          |          |
| H  | 2.82215  | 2.71592  | 1.66084  |   |          |          |          |
| H  | 1.56000  | 3.78379  | 1.01588  |   |          |          |          |
| H  | 1.16723  | 2.61041  | 2.29728  |   |          |          |          |
| H  | -1.94126 | -1.57264 | 0.64226  |   |          |          |          |
| H  | -5.73912 | -0.12968 | -0.76477 |   |          |          |          |
| H  | -4.69493 | 2.07506  | -1.26427 |   |          |          |          |

**1d NMR Conformer 7**

Energy: -875541.7962210

|    |          |          |          |
|----|----------|----------|----------|
| O  | 1.34959  | 2.53915  | 0.84044  |
| C  | 2.23991  | 1.62930  | 0.41333  |
| C  | 1.90309  | 0.27980  | 0.17848  |
| C  | 0.53017  | -0.17029 | 0.40294  |
| N  | -0.43037 | 0.58658  | 0.79265  |
| C  | -1.63413 | -0.24182 | 0.88089  |
| C  | -2.70571 | 0.30003  | -0.06701 |
| O  | -2.97594 | 1.66498  | 0.23031  |
| C  | -4.02446 | -0.44910 | 0.10062  |
| C  | -5.11725 | -0.03394 | -0.87044 |
| O  | -5.20793 | 1.26600  | -1.15767 |
| O  | -5.90095 | -0.82239 | -1.35055 |
| C  | -1.14490 | -1.66804 | 0.51869  |
| C  | -1.25612 | -2.66967 | 1.64819  |
| O  | 0.25665  | -1.46816 | 0.19141  |
| C  | 2.87964  | -0.62340 | -0.26311 |
| C  | 4.17313  | -0.18106 | -0.46828 |
| Cl | 5.39387  | -1.30570 | -1.01807 |
| C  | 4.52074  | 1.15311  | -0.24035 |

**1d NMR Conformer 6**

Energy: -875533.7052959

|    |          |          |          |
|----|----------|----------|----------|
| O  | -1.75805 | 2.87849  | -0.36725 |
| C  | -2.44553 | 1.72304  | -0.24396 |
| C  | -1.87139 | 0.46954  | 0.04081  |
| C  | -0.42631 | 0.26997  | 0.23641  |
| N  | 0.17565  | -0.84942 | 0.31622  |
| C  | 1.59039  | -0.55297 | 0.58127  |
| C  | 2.47866  | -1.44086 | -0.29446 |
| O  | 2.14287  | -2.79860 | -0.07565 |
| C  | 3.95941  | -1.32046 | 0.04756  |
| C  | 4.65138  | -0.12395 | -0.55449 |
| O  | 5.79445  | 0.15577  | 0.07924  |
| O  | 4.25676  | 0.50909  | -1.51087 |
| C  | 1.71978  | 0.96394  | 0.33440  |
| C  | 2.50434  | 1.73274  | 1.37354  |
| O  | 0.32930  | 1.39561  | 0.35915  |
| C  | -2.69659 | -0.66264 | 0.13280  |
| C  | -4.05936 | -0.54627 | -0.05364 |
| Cl | -5.07416 | -1.96521 | 0.06699  |
| C  | -4.63996 | 0.69289  | -0.33618 |
| C  | -3.83282 | 1.81324  | -0.42901 |
| H  | -0.80881 | 2.74090  | -0.20312 |
| H  | 1.80204  | -0.80271 | 1.63385  |
| H  | 2.31912  | -1.16829 | -1.34834 |
| H  | 1.18065  | -2.88898 | -0.18468 |
| H  | 4.47296  | -2.20465 | -0.35119 |
| H  | 4.11976  | -1.33035 | 1.13109  |
| H  | 6.23601  | 0.90657  | -0.37254 |
| H  | 2.08654  | 1.16729  | -0.67778 |
| H  | 3.54513  | 1.39331  | 1.38577  |
| H  | 2.49949  | 2.80284  | 1.15456  |

|   |          |          |          |
|---|----------|----------|----------|
| H | 2.07778  | 1.56756  | 2.36681  |
| H | -2.24244 | -1.62354 | 0.35476  |
| H | -5.71347 | 0.77448  | -0.47998 |
| H | -4.25819 | 2.78783  | -0.64904 |

**1d NMR Conformer 5**

Energy: -875535.6156983

|    |          |          |          |
|----|----------|----------|----------|
| O  | -2.48564 | -2.78040 | 0.18536  |
| C  | -2.72093 | -1.45491 | 0.08488  |
| C  | -1.72791 | -0.46749 | -0.05680 |
| C  | -0.28658 | -0.76790 | -0.11180 |
| N  | 0.64557  | 0.07376  | -0.32653 |
| C  | 1.91393  | -0.65732 | -0.23531 |
| C  | 2.72235  | -0.15009 | 0.96718  |
| O  | 1.99493  | -0.33672 | 2.16708  |
| C  | 3.13980  | 1.31001  | 0.81288  |
| C  | 4.18160  | 1.52112  | -0.25518 |
| O  | 4.41611  | 2.81896  | -0.47437 |
| O  | 4.76513  | 0.63706  | -0.84639 |
| C  | 1.51066  | -2.14351 | -0.09340 |
| C  | 1.80973  | -2.98826 | -1.31374 |
| O  | 0.06968  | -2.06454 | 0.08977  |
| C  | -2.10713 | 0.88072  | -0.15829 |
| C  | -3.44098 | 1.23335  | -0.11687 |
| Cl | -3.89586 | 2.91732  | -0.24215 |
| C  | -4.43475 | 0.26132  | 0.02517  |
| C  | -4.06903 | -1.06954 | 0.12440  |
| H  | -1.53173 | -2.97053 | 0.16262  |
| H  | 2.50099  | -0.49533 | -1.14717 |
| H  | 3.61824  | -0.77489 | 1.05916  |
| H  | 1.19006  | 0.21094  | 2.13715  |
| H  | 3.56580  | 1.66618  | 1.75824  |
| H  | 2.27357  | 1.94391  | 0.59249  |
| H  | 5.11434  | 2.90640  | -1.15745 |
| H  | 1.91305  | -2.58907 | 0.82111  |
| H  | 2.89280  | -3.05404 | -1.45438 |
| H  | 1.41186  | -3.99912 | -1.19793 |
| H  | 1.37024  | -2.53177 | -2.20620 |
| H  | -1.33256 | 1.63360  | -0.26778 |
| H  | -5.48175 | 0.54866  | 0.05766  |
| H  | -4.82047 | -1.84571 | 0.23442  |

**1d NMR Conformer 4**

Energy: -875538.2946366

|   |          |         |         |
|---|----------|---------|---------|
| O | 1.66007  | 2.74958 | 0.20747 |
| C | 2.41196  | 1.64569 | 0.08085 |
| C | 1.87218  | 0.34401 | 0.10274 |
| C | 0.43256  | 0.15310 | 0.27232 |
| N | -0.42157 | 1.10645 | 0.37452 |

|    |          |          |          |
|----|----------|----------|----------|
| C  | -1.73669 | 0.49541  | 0.58646  |
| C  | -2.77293 | 1.10158  | -0.36673 |
| O  | -2.79856 | 2.50962  | -0.21693 |
| C  | -4.18907 | 0.63353  | -0.04664 |
| C  | -4.56621 | -0.70828 | -0.62030 |
| O  | -5.58649 | -1.25906 | 0.04242  |
| O  | -4.03975 | -1.24038 | -1.57367 |
| C  | -1.47814 | -1.01811 | 0.39266  |
| C  | -1.99520 | -1.89390 | 1.51159  |
| O  | -0.02516 | -1.10689 | 0.33214  |
| C  | 2.71266  | -0.76856 | -0.03266 |
| C  | 4.07220  | -0.57938 | -0.18784 |
| Cl | 5.12467  | -1.96631 | -0.35640 |
| C  | 4.62097  | 0.70499  | -0.21284 |
| C  | 3.79325  | 1.80734  | -0.07881 |
| H  | 0.71535  | 2.47653  | 0.32390  |
| H  | -2.06083 | 0.72113  | 1.61406  |
| H  | -2.51117 | 0.82541  | -1.39956 |
| H  | -1.89987 | 2.85416  | -0.35329 |
| H  | -4.88890 | 1.35748  | -0.48294 |
| H  | -4.37439 | 0.63611  | 1.03306  |
| H  | -5.83075 | -2.10439 | -0.38880 |
| H  | -1.84028 | -1.36604 | -0.57946 |
| H  | -3.08766 | -1.81944 | 1.56283  |
| H  | -1.73104 | -2.94040 | 1.34477  |
| H  | -1.58473 | -1.56742 | 2.47116  |
| H  | 2.28812  | -1.76788 | -0.01358 |
| H  | 5.69217  | 0.83514  | -0.33628 |
| H  | 4.19944  | 2.81415  | -0.09510 |

**1d NMR Conformer 3**

Energy: -875536.0724311

|   |          |          |          |
|---|----------|----------|----------|
| O | 2.18889  | 2.88115  | 0.39550  |
| C | 2.67947  | 1.63816  | 0.20579  |
| C | 1.89968  | 0.48095  | 0.01952  |
| C | 0.42813  | 0.48954  | 0.01026  |
| N | -0.32869 | -0.53538 | 0.00851  |
| C | -1.70872 | -0.04664 | -0.04269 |
| C | -2.53061 | -0.70457 | 1.06595  |
| O | -2.49334 | -2.11966 | 0.93513  |
| C | -4.00167 | -0.29195 | 1.03136  |
| C | -4.70827 | -0.59331 | -0.28005 |
| O | -4.50389 | -1.80401 | -0.80598 |
| O | -5.44569 | 0.19518  | -0.82979 |
| C | -1.60272 | 1.48864  | 0.09602  |
| C | -2.32793 | 2.28098  | -0.96834 |
| O | -0.17087 | 1.71109  | -0.01379 |
| C | 2.53557  | -0.75855 | -0.15762 |
| C | 3.91332  | -0.84039 | -0.14977 |

|    |          |          |          |   |          |          |          |
|----|----------|----------|----------|---|----------|----------|----------|
| Cl | 4.69031  | -2.39007 | -0.37635 | H | 1.38156  | -3.50656 | -0.48519 |
| C  | 4.69700  | 0.30179  | 0.03426  | H | 1.54011  | -2.25817 | -1.74563 |
| C  | 4.07756  | 1.52652  | 0.21024  | H | -2.57750 | -1.70758 | 0.23815  |
| H  | 1.21711  | 2.88864  | 0.35155  | H | -5.60601 | 1.30912  | -0.21807 |
| H  | -2.14103 | -0.32847 | -1.01668 | H | -3.83792 | 3.04175  | -0.48656 |
| H  | -2.10575 | -0.40880 | 2.03601  |   |          |          |          |
| H  | -1.56976 | -2.40445 | 0.80584  |   |          |          |          |
| H  | -4.11342 | 0.77602  | 1.23291  |   |          |          |          |
| H  | -4.52884 | -0.83600 | 1.82472  |   |          |          |          |
| H  | -3.83112 | -2.29510 | -0.28520 |   |          |          |          |
| H  | -1.88821 | 1.81888  | 1.10395  |   |          |          |          |
| H  | -3.40333 | 2.08648  | -0.90038 |   |          |          |          |
| H  | -2.15967 | 3.35263  | -0.84151 |   |          |          |          |
| H  | -1.98351 | 1.97866  | -1.96139 |   |          |          |          |
| H  | 1.92406  | -1.64382 | -0.30288 |   |          |          |          |
| H  | 5.78065  | 0.22770  | 0.03730  |   |          |          |          |
| H  | 4.66288  | 2.42945  | 0.35605  |   |          |          |          |

**1d NMR Conformer 2**

Energy: -875540.2859564

|    |          |          |          |
|----|----------|----------|----------|
| O  | -1.31055 | 2.63154  | -0.42394 |
| C  | -2.21812 | 1.65329  | -0.27425 |
| C  | -1.86352 | 0.30384  | -0.06914 |
| C  | -0.45202 | -0.07431 | -0.01855 |
| N  | 0.52747  | 0.74970  | -0.11800 |
| C  | 1.76197  | -0.03351 | -0.05452 |
| C  | 2.69432  | 0.52942  | 1.01962  |
| O  | 3.01137  | 1.88770  | 0.74807  |
| C  | 4.02064  | -0.22701 | 1.09257  |
| C  | 4.80462  | -0.24900 | -0.20975 |
| O  | 4.91746  | 0.91099  | -0.86321 |
| O  | 5.33061  | -1.24858 | -0.64680 |
| C  | 1.28745  | -1.47657 | 0.24064  |
| C  | 1.80280  | -2.52622 | -0.71820 |
| O  | -0.15869 | -1.37712 | 0.12964  |
| C  | -2.85982 | -0.67104 | 0.08055  |
| C  | -4.19015 | -0.29936 | 0.02646  |
| Cl | -5.43463 | -1.51313 | 0.21370  |
| C  | -4.55582 | 1.03403  | -0.17709 |
| C  | -3.57418 | 2.00062  | -0.32646 |
| H  | -0.40301 | 2.24042  | -0.37108 |
| H  | 2.26718  | 0.03009  | -1.03165 |
| H  | 2.18998  | 0.45083  | 1.99350  |
| H  | 2.19128  | 2.39632  | 0.61160  |
| H  | 3.86391  | -1.26264 | 1.40340  |
| H  | 4.64852  | 0.25614  | 1.85095  |
| H  | 4.38134  | 1.60788  | -0.42700 |
| H  | 1.49269  | -1.75591 | 1.28283  |
| H  | 2.89349  | -2.58771 | -0.64348 |

**1d NMR Conformer 1**

Energy: -875540.4403551

|    |          |          |          |
|----|----------|----------|----------|
| O  | 0.67749  | -2.46249 | -0.32923 |
| C  | 1.75968  | -1.67429 | -0.22970 |
| C  | 1.67338  | -0.27139 | -0.11485 |
| C  | 0.35951  | 0.37262  | -0.10503 |
| N  | -0.75611 | -0.25827 | -0.18140 |
| C  | -1.82814 | 0.73999  | -0.14491 |
| C  | -2.78956 | 0.44689  | 1.01332  |
| O  | -2.08297 | 0.39330  | 2.23691  |
| C  | -3.58640 | -0.83605 | 0.78859  |
| C  | -4.60830 | -0.71424 | -0.31223 |
| O  | -5.18554 | -1.88712 | -0.58831 |
| O  | -4.89980 | 0.31496  | -0.88318 |
| C  | -1.08977 | 2.08815  | 0.02498  |
| C  | -1.37737 | 3.10644  | -1.05525 |
| O  | 0.31673  | 1.71132  | -0.02261 |
| C  | 2.83890  | 0.49973  | -0.01230 |
| C  | 4.07206  | -0.12510 | -0.02524 |
| Cl | 5.52886  | 0.83406  | 0.10313  |
| C  | 4.17248  | -1.51372 | -0.14033 |
| C  | 3.02234  | -2.27982 | -0.24183 |
| H  | -0.13437 | -1.89007 | -0.31313 |
| H  | -2.38738 | 0.71085  | -1.08912 |
| H  | -3.48413 | 1.28996  | 1.10397  |
| H  | -1.46421 | -0.35860 | 2.21100  |
| H  | -4.12676 | -1.09200 | 1.70744  |
| H  | -2.92224 | -1.67919 | 0.56378  |
| H  | -5.85531 | -1.75657 | -1.29213 |
| H  | -1.26167 | 2.50198  | 1.02467  |
| H  | -2.43687 | 3.37971  | -1.02391 |
| H  | -0.78198 | 4.01076  | -0.90951 |
| H  | -1.15510 | 2.68680  | -2.04086 |
| H  | 2.76274  | 1.57929  | 0.07637  |
| H  | 5.14964  | -1.98847 | -0.14985 |
| H  | 3.07976  | -3.36046 | -0.33210 |

**1c NMR Conformer 29**

Energy: -875533.1911586

|   |         |         |          |
|---|---------|---------|----------|
| O | 2.51552 | 2.83640 | 0.04728  |
| C | 2.89786 | 1.54172 | 0.05239  |
| C | 2.03668 | 0.44700 | -0.14820 |
| C | 0.59038 | 0.58828 | -0.37848 |

|    |          |          |          |    |          |          |          |
|----|----------|----------|----------|----|----------|----------|----------|
| N  | -0.26079 | -0.35704 | -0.42911 | C  | 3.92741  | -0.74604 | 0.00211  |
| C  | -1.54909 | 0.26288  | -0.77264 | Cl | 4.73000  | -2.28734 | 0.20742  |
| C  | -2.68861 | -0.44742 | -0.04313 | C  | 4.68993  | 0.41272  | -0.13630 |
| O  | -2.62891 | -1.83868 | -0.29510 | C  | 4.04396  | 1.62844  | -0.29870 |
| C  | -4.05166 | 0.01467  | -0.54931 | H  | 2.66714  | 3.60714  | -0.61043 |
| C  | -5.17276 | -0.71320 | 0.15081  | H  | -2.00411 | -0.01758 | -1.40858 |
| O  | -5.09148 | -0.59926 | 1.48184  | H  | -2.71732 | -1.01211 | 1.35741  |
| O  | -6.05812 | -1.32456 | -0.40548 | H  | -1.01271 | -2.35635 | 0.07574  |
| C  | -1.33571 | 1.75963  | -0.45355 | H  | -4.47528 | -2.22275 | 0.05003  |
| C  | -1.72282 | 2.22253  | 0.94128  | H  | -3.81648 | -1.57931 | -1.44309 |
| O  | 0.11732  | 1.85601  | -0.55848 | H  | -6.58198 | 0.44486  | -0.69735 |
| C  | 2.55904  | -0.85657 | -0.11756 | H  | -2.27751 | 1.99040  | -0.19125 |
| C  | 3.90492  | -1.05985 | 0.10860  | H  | -2.88085 | 1.12686  | 2.07393  |
| Cl | 4.54265  | -2.68757 | 0.13943  | H  | -1.20452 | 0.56655  | 2.31611  |
| C  | 4.76891  | 0.02026  | 0.31032  | H  | -1.55405 | 2.30138  | 2.18043  |
| C  | 4.26188  | 1.30710  | 0.28064  | H  | 1.95238  | -1.59454 | 0.09039  |
| H  | 1.56147  | 2.91928  | -0.12417 | H  | 5.77482  | 0.36427  | -0.11871 |
| H  | -1.70632 | 0.12440  | -1.85318 | H  | 4.62413  | 2.54143  | -0.41529 |
| H  | -2.60790 | -0.26093 | 1.03651  |    |          |          |          |
| H  | -1.73715 | -2.15021 | -0.06270 |    |          |          |          |
| H  | -4.13986 | -0.18066 | -1.62057 |    |          |          |          |
| H  | -4.18356 | 1.08841  | -0.37343 |    |          |          |          |
| H  | -5.83787 | -1.08556 | 1.89022  |    |          |          |          |
| H  | -1.74990 | 2.41234  | -1.22481 |    |          |          |          |
| H  | -2.80660 | 2.19498  | 1.08371  |    |          |          |          |
| H  | -1.25495 | 1.59223  | 1.70369  |    |          |          |          |
| H  | -1.38879 | 3.25236  | 1.08658  |    |          |          |          |
| H  | 1.88583  | -1.69311 | -0.27747 |    |          |          |          |
| H  | 5.82686  | -0.15119 | 0.48659  |    |          |          |          |
| H  | 4.91043  | 2.16430  | 0.43488  |    |          |          |          |

**1c NMR Conformer 28**

Energy: -875525.8315958

|   |          |          |          |
|---|----------|----------|----------|
| O | 2.01561  | 2.88970  | -0.50027 |
| C | 2.64476  | 1.70824  | -0.32055 |
| C | 1.88509  | 0.53505  | -0.17227 |
| C | 0.40788  | 0.50467  | -0.17652 |
| N | -0.28673 | -0.55309 | -0.36167 |
| C | -1.69907 | -0.13060 | -0.35616 |
| C | -2.58141 | -1.22726 | 0.28952  |
| O | -1.97300 | -2.49970 | 0.14522  |
| C | -3.94760 | -1.36201 | -0.37612 |
| C | -4.84181 | -0.16118 | -0.24177 |
| O | -6.02718 | -0.35371 | -0.82893 |
| O | -4.56481 | 0.85374  | 0.36310  |
| C | -1.64409 | 1.26231  | 0.31337  |
| C | -1.83631 | 1.30999  | 1.81826  |
| O | -0.25868 | 1.65293  | 0.04395  |
| C | 2.54591  | -0.69222 | -0.01793 |

**1c NMR Conformer 27**

Energy: -875537.7357265

|    |          |          |          |
|----|----------|----------|----------|
| O  | 0.70578  | -2.42462 | -0.31249 |
| C  | 1.80729  | -1.67212 | -0.15983 |
| C  | 1.78468  | -0.26322 | -0.22270 |
| C  | 0.51989  | 0.42816  | -0.47376 |
| N  | -0.60903 | -0.16082 | -0.63387 |
| C  | -1.61195 | 0.87654  | -0.90029 |
| C  | -2.86370 | 0.62484  | -0.04912 |
| O  | -2.54765 | 0.45526  | 1.31849  |
| C  | -3.62775 | -0.58857 | -0.57485 |
| C  | -4.94147 | -0.76506 | 0.14456  |
| O  | -5.27353 | -2.05201 | 0.29224  |
| O  | -5.64545 | 0.14335  | 0.52742  |
| C  | -0.84611 | 2.21076  | -0.66199 |
| C  | -1.18282 | 3.01920  | 0.57700  |
| O  | 0.54103  | 1.76718  | -0.55309 |
| C  | 2.96801  | 0.46794  | -0.05269 |
| C  | 4.15557  | -0.20186 | 0.17615  |
| Cl | 5.63485  | 0.70674  | 0.38561  |
| C  | 4.19222  | -1.59692 | 0.24043  |
| C  | 3.02456  | -2.32387 | 0.07298  |
| H  | -0.06893 | -1.82531 | -0.47354 |
| H  | -1.90764 | 0.81057  | -1.95593 |
| H  | -3.52052 | 1.50006  | -0.09688 |
| H  | -1.90944 | -0.27630 | 1.40118  |
| H  | -3.02681 | -1.49754 | -0.47836 |
| H  | -3.86308 | -0.46079 | -1.63971 |
| H  | -6.15131 | -2.10606 | 0.72674  |
| H  | -0.89349 | 2.84206  | -1.55272 |

|   |          |          |          |
|---|----------|----------|----------|
| H | -2.21831 | 3.36833  | 0.53187  |
| H | -1.06213 | 2.41940  | 1.48020  |
| H | -0.52821 | 3.89265  | 0.62577  |
| H | 2.94125  | 1.55234  | -0.10341 |
| H | 5.13400  | -2.10774 | 0.42084  |
| H | 3.03324  | -3.40880 | 0.11973  |

**1c NMR Conformer 26**

Energy: -875526.0295562

|    |          |          |          |
|----|----------|----------|----------|
| O  | 1.88507  | 2.78279  | 0.30299  |
| C  | 2.58866  | 1.64315  | 0.12214  |
| C  | 1.89233  | 0.44064  | -0.08892 |
| C  | 0.41995  | 0.36865  | -0.15387 |
| N  | -0.27542 | -0.61876 | 0.26347  |
| C  | -1.66278 | -0.34495 | -0.16058 |
| C  | -2.66405 | -0.91724 | 0.86483  |
| O  | -2.12968 | -2.08313 | 1.47088  |
| C  | -3.97063 | -1.39101 | 0.23617  |
| C  | -4.80936 | -0.32607 | -0.41255 |
| O  | -5.92235 | -0.83519 | -0.95187 |
| O  | -4.53982 | 0.85567  | -0.45560 |
| C  | -1.64521 | 1.18076  | -0.40971 |
| C  | -1.95198 | 2.06905  | 0.78404  |
| O  | -0.23778 | 1.38601  | -0.74496 |
| C  | 2.60592  | -0.75524 | -0.22625 |
| C  | 3.99006  | -0.75007 | -0.16971 |
| Cl | 4.86713  | -2.25165 | -0.35283 |
| C  | 4.69078  | 0.43767  | 0.02565  |
| C  | 3.98720  | 1.62539  | 0.17361  |
| H  | 2.48727  | 3.52904  | 0.47824  |
| H  | -1.81315 | -0.87125 | -1.11728 |
| H  | -2.87391 | -0.16438 | 1.63671  |
| H  | -1.17423 | -1.94476 | 1.58354  |
| H  | -4.58257 | -1.87443 | 1.00604  |
| H  | -3.75555 | -2.16312 | -0.51241 |
| H  | -6.44024 | -0.10875 | -1.35876 |
| H  | -2.22523 | 1.46977  | -1.28502 |
| H  | -3.01333 | 2.02708  | 1.03026  |
| H  | -1.36272 | 1.76414  | 1.65535  |
| H  | -1.68625 | 3.09924  | 0.53532  |
| H  | 2.05827  | -1.67950 | -0.38372 |
| H  | 5.77623  | 0.43540  | 0.06530  |
| H  | 4.52334  | 2.55721  | 0.33973  |

**1c NMR Conformer 25**

Energy: -875537.3319242

|   |          |         |          |
|---|----------|---------|----------|
| O | -1.28181 | 2.61046 | 0.06918  |
| C | -2.24416 | 1.67326 | 0.07308  |
| C | -1.97568 | 0.30402 | -0.12579 |

|    |          |          |          |
|----|----------|----------|----------|
| C  | -0.60177 | -0.13430 | -0.36380 |
| N  | 0.42277  | 0.63776  | -0.36380 |
| C  | 1.56876  | -0.19103 | -0.76464 |
| C  | 2.83466  | 0.22518  | -0.01818 |
| O  | 3.07745  | 1.60655  | -0.21207 |
| C  | 4.06245  | -0.49460 | -0.56508 |
| C  | 5.31763  | -0.06366 | 0.15373  |
| O  | 5.21468  | -0.21041 | 1.47956  |
| O  | 6.31797  | 0.35243  | -0.38739 |
| C  | 1.05526  | -1.62961 | -0.53030 |
| C  | 1.34583  | -2.23502 | 0.83386  |
| O  | -0.38813 | -1.44011 | -0.62201 |
| C  | -3.02172 | -0.62887 | -0.10593 |
| C  | -4.31697 | -0.19490 | 0.10824  |
| Cl | -5.62493 | -1.35442 | 0.13439  |
| C  | -4.59699 | 1.15989  | 0.30408  |
| C  | -3.56529 | 2.08512  | 0.28515  |
| H  | -0.40874 | 2.17422  | -0.09155 |
| H  | 1.74325  | -0.02044 | -1.83801 |
| H  | 2.71980  | 0.01201  | 1.05308  |
| H  | 2.32707  | 2.10862  | 0.14881  |
| H  | 4.19071  | -0.27067 | -1.62669 |
| H  | 3.95937  | -1.57932 | -0.44539 |
| H  | 6.05193  | 0.07770  | 1.89849  |
| H  | 1.33837  | -2.30740 | -1.33843 |
| H  | 2.41242  | -2.43860 | 0.96286  |
| H  | 1.01910  | -1.56383 | 1.63416  |
| H  | 0.80651  | -3.17993 | 0.93023  |
| H  | -2.80558 | -1.68194 | -0.25844 |
| H  | -5.62011 | 1.48417  | 0.47156  |
| H  | -3.76286 | 3.14205  | 0.43650  |

**1c NMR Conformer 24**

Energy: -875535.1879502

|   |          |          |          |
|---|----------|----------|----------|
| O | 0.22305  | -2.24548 | -0.11522 |
| C | 1.36306  | -1.53644 | -0.05738 |
| C | 1.39054  | -0.13472 | -0.19740 |
| C | 0.14182  | 0.59301  | -0.41862 |
| N | -1.01198 | 0.03350  | -0.45303 |
| C | -1.99711 | 1.07705  | -0.74001 |
| C | -3.20393 | 0.94686  | 0.20168  |
| O | -2.81779 | 0.92314  | 1.55720  |
| C | -4.08287 | -0.26027 | -0.18007 |
| C | -3.38058 | -1.59340 | -0.12622 |
| O | -2.95571 | -1.89406 | 1.11280  |
| O | -3.20190 | -2.32944 | -1.07061 |
| C | -1.17906 | 2.39716  | -0.66286 |
| C | -1.40446 | 3.31366  | 0.52582  |
| O | 0.20077  | 1.91947  | -0.61026 |

|    |          |          |          |   |          |          |          |
|----|----------|----------|----------|---|----------|----------|----------|
| C  | 2.60605  | 0.55782  | -0.13036 | H | 1.43096  | -1.78817 | -1.47295 |
| C  | 3.77832  | -0.14573 | 0.07627  | H | 2.90853  | -2.72933 | 0.25724  |
| Cl | 5.29889  | 0.71205  | 0.16617  | H | 1.78717  | -2.20635 | 1.54804  |
| C  | 3.76602  | -1.53572 | 0.21549  | H | 1.28956  | -3.43396 | 0.37203  |
| C  | 2.56450  | -2.22365 | 0.14772  | H | -2.52452 | -1.71433 | -0.01677 |
| H  | -0.52448 | -1.61137 | -0.28003 | H | -5.57506 | 1.31317  | 0.06173  |
| H  | -2.35660 | 0.93442  | -1.76853 | H | -3.82895 | 3.07579  | -0.16133 |
| H  | -3.83813 | 1.83243  | 0.08236  |   |          |          |          |
| H  | -2.30457 | 0.11620  | 1.72399  |   |          |          |          |
| H  | -4.47014 | -0.13257 | -1.19315 |   |          |          |          |
| H  | -4.92664 | -0.29304 | 0.51661  |   |          |          |          |
| H  | -2.52288 | -2.77216 | 1.10516  |   |          |          |          |
| H  | -1.27263 | 2.95890  | -1.59501 |   |          |          |          |
| H  | -2.43733 | 3.67404  | 0.54010  |   |          |          |          |
| H  | -1.21217 | 2.79065  | 1.46325  |   |          |          |          |
| H  | -0.74155 | 4.17822  | 0.44549  |   |          |          |          |
| H  | 2.61717  | 1.63824  | -0.23910 |   |          |          |          |
| H  | 4.69629  | -2.07233 | 0.37661  |   |          |          |          |
| H  | 2.53511  | -3.30376 | 0.25296  |   |          |          |          |

**1c NMR Conformer 23**

Energy: -875534.1505766

|    |          |          |          |
|----|----------|----------|----------|
| O  | -1.30622 | 2.67494  | -0.33752 |
| C  | -2.20099 | 1.68239  | -0.21303 |
| C  | -1.83360 | 0.32190  | -0.16895 |
| C  | -0.42174 | -0.05146 | -0.24711 |
| N  | 0.54732  | 0.78328  | -0.35112 |
| C  | 1.80220  | 0.01484  | -0.32054 |
| C  | 2.57906  | 0.44809  | 0.93840  |
| O  | 2.76027  | 1.85280  | 0.90653  |
| C  | 3.98689  | -0.14729 | 1.09143  |
| C  | 4.79652  | -0.07417 | -0.17924 |
| O  | 4.51091  | -1.08940 | -1.01046 |
| O  | 5.60367  | 0.78576  | -0.45099 |
| C  | 1.31923  | -1.45909 | -0.43429 |
| C  | 1.86633  | -2.51520 | 0.50201  |
| O  | -0.11691 | -1.35586 | -0.19581 |
| C  | -2.81681 | -0.66900 | -0.04732 |
| C  | -4.14649 | -0.30169 | 0.03413  |
| Cl | -5.37605 | -1.53617 | 0.18858  |
| C  | -4.52512 | 1.04271  | -0.00398 |
| C  | -3.55616 | 2.02536  | -0.12739 |
| H  | -0.40039 | 2.28010  | -0.40050 |
| H  | 2.39779  | 0.28974  | -1.19715 |
| H  | 1.99642  | 0.16446  | 1.82912  |
| H  | 1.89799  | 2.27372  | 0.75167  |
| H  | 3.93120  | -1.18647 | 1.41669  |
| H  | 4.50194  | 0.43642  | 1.85641  |
| H  | 5.03936  | -0.99316 | -1.83083 |

**1c NMR Conformer 22**

Energy: -875531.3672521

|    |          |          |          |
|----|----------|----------|----------|
| O  | 2.29316  | 2.85026  | -0.34222 |
| C  | 2.73074  | 1.57707  | -0.24372 |
| C  | 1.90026  | 0.44564  | -0.13658 |
| C  | 0.43095  | 0.51941  | -0.10888 |
| N  | -0.36965 | -0.44574 | 0.10967  |
| C  | -1.72640 | 0.09550  | -0.07804 |
| C  | -2.68511 | -0.56733 | 0.91136  |
| O  | -2.63875 | -1.97109 | 0.74147  |
| C  | -4.15552 | -0.15910 | 0.75728  |
| C  | -4.78708 | -0.69730 | -0.50466 |
| O  | -4.35078 | -0.06555 | -1.60331 |
| O  | -5.60734 | -1.58712 | -0.54293 |
| C  | -1.53044 | 1.62154  | 0.03412  |
| C  | -1.67172 | 2.22885  | 1.42043  |
| O  | -0.12827 | 1.74187  | -0.35411 |
| C  | 2.48140  | -0.82910 | -0.03941 |
| C  | 3.85447  | -0.96939 | -0.04536 |
| Cl | 4.56290  | -2.56367 | 0.07236  |
| C  | 4.68805  | 0.14737  | -0.14926 |
| C  | 4.12284  | 1.40657  | -0.24781 |
| H  | 1.32091  | 2.88728  | -0.35031 |
| H  | -2.04619 | -0.16592 | -1.09419 |
| H  | -2.37331 | -0.30247 | 1.93222  |
| H  | -1.70863 | -2.25088 | 0.79699  |
| H  | -4.25125 | 0.93119  | 0.75765  |
| H  | -4.71988 | -0.56381 | 1.59897  |
| H  | -4.78385 | -0.45743 | -2.39135 |
| H  | -2.11276 | 2.16943  | -0.70992 |
| H  | -2.70815 | 2.19735  | 1.76604  |
| H  | -1.04649 | 1.69563  | 2.14317  |
| H  | -1.35698 | 3.27454  | 1.39189  |
| H  | 1.83143  | -1.69530 | 0.03805  |
| H  | 5.76747  | 0.02642  | -0.15486 |
| H  | 4.74705  | 2.29127  | -0.33029 |

**1c NMR Conformer 20**

Energy: -875533.5458207

|   |         |         |         |
|---|---------|---------|---------|
| O | 2.47614 | 2.85105 | 0.07368 |
| C | 2.88647 | 1.56492 | 0.06518 |



|    |          |          |          |    |          |          |          |
|----|----------|----------|----------|----|----------|----------|----------|
| C  | 2.04836  | 0.45321  | -0.14224 | O  | 0.24885  | 1.92700  | -0.54979 |
| C  | 0.59862  | 0.56409  | -0.36739 | C  | 2.66562  | 0.52980  | -0.18628 |
| N  | -0.23213 | -0.39852 | -0.42515 | C  | 3.82945  | -0.18922 | 0.01017  |
| C  | -1.53324 | 0.19621  | -0.76636 | Cl | 5.37679  | 0.62703  | -0.08590 |
| C  | -2.65923 | -0.53820 | -0.04000 | C  | 3.79282  | -1.56006 | 0.27763  |
| O  | -2.57661 | -1.92621 | -0.30856 | C  | 2.57253  | -2.21132 | 0.35171  |
| C  | -4.02594 | -0.09240 | -0.53293 | H  | -0.54043 | -1.55448 | 0.15708  |
| C  | -5.14008 | -0.64577 | 0.32374  | H  | -2.26382 | 0.99912  | -1.76897 |
| O  | -6.27541 | -0.79627 | -0.36558 | H  | -3.79766 | 1.90776  | 0.02555  |
| O  | -5.04627 | -0.89637 | 1.50537  | H  | -2.40926 | 0.09908  | 1.68963  |
| C  | -1.34997 | 1.69638  | -0.44282 | H  | -4.42399 | -0.05225 | -1.31477 |
| C  | -1.75490 | 2.14562  | 0.95147  | H  | -4.99129 | -0.18073 | 0.35989  |
| O  | 0.09976  | 1.82316  | -0.54287 | H  | -3.22472 | -3.20816 | -0.95861 |
| C  | 2.59921  | -0.83850 | -0.12565 | H  | -1.20949 | 3.05330  | -1.45781 |
| C  | 3.95008  | -1.01501 | 0.09565  | H  | -2.35285 | 3.65715  | 0.71217  |
| Cl | 4.62186  | -2.62926 | 0.11071  | H  | -1.20741 | 2.62619  | 1.58503  |
| C  | 4.79070  | 0.08152  | 0.30506  | H  | -0.63084 | 4.07515  | 0.71297  |
| C  | 4.25558  | 1.35757  | 0.28784  | H  | 2.69460  | 1.59376  | -0.40090 |
| H  | 1.52215  | 2.91548  | -0.10539 | H  | 4.71806  | -2.10998 | 0.42974  |
| H  | -1.68717 | 0.05877  | -1.84768 | H  | 2.52059  | -3.27450 | 0.56933  |
| H  | -2.57977 | -0.36412 | 1.04171  |    |          |          |          |
| H  | -1.69150 | -2.23160 | -0.04540 |    |          |          |          |
| H  | -4.16976 | -0.40897 | -1.57024 |    |          |          |          |
| H  | -4.12408 | 1.00060  | -0.50970 |    |          |          |          |
| H  | -6.97719 | -1.11452 | 0.24122  |    |          |          |          |
| H  | -1.77485 | 2.34303  | -1.21344 |    |          |          |          |
| H  | -2.83875 | 2.09174  | 1.08655  |    |          |          |          |
| H  | -1.27786 | 1.52251  | 1.71406  |    |          |          |          |
| H  | -1.44564 | 3.18224  | 1.10325  |    |          |          |          |
| H  | 1.94382  | -1.68810 | -0.29133 |    |          |          |          |
| H  | 5.85269  | -0.06781 | 0.47718  |    |          |          |          |
| H  | 4.88628  | 2.22697  | 0.44761  |    |          |          |          |

**1c NMR Conformer 19**

Energy: -875534.5226898

|   |          |          |          |
|---|----------|----------|----------|
| O | 0.21957  | -2.18406 | 0.27664  |
| C | 1.37312  | -1.50964 | 0.15835  |
| C | 1.42812  | -0.12664 | -0.12087 |
| C | 0.17848  | 0.60012  | -0.35463 |
| N | -0.97986 | 0.05509  | -0.41365 |
| C | -1.95055 | 1.11677  | -0.72138 |
| C | -3.20597 | 0.99397  | 0.15713  |
| O | -2.89130 | 0.93119  | 1.52787  |
| C | -4.09988 | -0.17856 | -0.27951 |
| C | -3.44967 | -1.52790 | -0.10109 |
| O | -3.62510 | -2.32923 | -1.15457 |
| O | -2.88119 | -1.88713 | 0.91078  |
| C | -1.12589 | 2.42822  | -0.56506 |
| C | -1.34063 | 3.24467  | 0.69521  |

**1c NMR Conformer 18**

Energy: -875535.4580679

|    |          |          |          |
|----|----------|----------|----------|
| O  | -1.22830 | 2.63801  | 0.16582  |
| C  | -2.16588 | 1.68367  | 0.04933  |
| C  | -1.85126 | 0.31223  | -0.04706 |
| C  | -0.45149 | -0.10913 | -0.03494 |
| N  | 0.55146  | 0.67802  | 0.10339  |
| C  | 1.75593  | -0.15090 | -0.06936 |
| C  | 2.87243  | 0.33462  | 0.85502  |
| O  | 3.15659  | 1.69429  | 0.58498  |
| C  | 4.19899  | -0.42043 | 0.70263  |
| C  | 4.89333  | -0.13326 | -0.60774 |
| O  | 4.28479  | -0.72171 | -1.64697 |
| O  | 5.89482  | 0.53633  | -0.72770 |
| C  | 1.22158  | -1.58332 | 0.15115  |
| C  | 1.27170  | -2.11762 | 1.57375  |
| O  | -0.18623 | -1.42151 | -0.19650 |
| C  | -2.87452 | -0.63833 | -0.16270 |
| C  | -4.19242 | -0.22092 | -0.18343 |
| Cl | -5.47089 | -1.40550 | -0.32806 |
| C  | -4.51868 | 1.13461  | -0.09094 |
| C  | -3.50957 | 2.07800  | 0.02426  |
| H  | -0.33460 | 2.21256  | 0.16742  |
| H  | 2.09139  | -0.03097 | -1.10658 |
| H  | 2.54205  | 0.21903  | 1.89730  |
| H  | 2.34154  | 2.21124  | 0.70544  |
| H  | 4.03596  | -1.49967 | 0.78084  |

|   |          |          |          |
|---|----------|----------|----------|
| H | 4.87219  | -0.10514 | 1.50135  |
| H | 4.76876  | -0.49811 | -2.47038 |
| H | 1.64548  | -2.29349 | -0.56226 |
| H | 2.29890  | -2.30264 | 1.89790  |
| H | 0.80787  | -1.41155 | 2.26956  |
| H | 0.72538  | -3.06209 | 1.62221  |
| H | -2.62223 | -1.69188 | -0.23500 |
| H | -5.55940 | 1.44545  | -0.10915 |
| H | -3.74260 | 3.13601  | 0.09777  |

**1c** NMR Conformer 17

Energy: -875529.6753109

|    |          |          |          |
|----|----------|----------|----------|
| O  | -2.05681 | -2.66696 | 0.66516  |
| C  | -2.57989 | -1.44898 | 0.39913  |
| C  | -1.73991 | -0.43950 | -0.10025 |
| C  | -0.30313 | -0.64115 | -0.38548 |
| N  | 0.57388  | 0.28600  | -0.30846 |
| C  | 1.86561  | -0.33330 | -0.63939 |
| C  | 2.73930  | -0.36391 | 0.62571  |
| O  | 2.07458  | -1.01324 | 1.69439  |
| C  | 3.17010  | 1.04108  | 1.04457  |
| C  | 4.18259  | 1.65657  | 0.11408  |
| O  | 4.42095  | 2.93853  | 0.41139  |
| O  | 4.74316  | 1.07610  | -0.79190 |
| C  | 1.47481  | -1.71521 | -1.21884 |
| C  | 2.27819  | -2.92567 | -0.79369 |
| O  | 0.09452  | -1.86462 | -0.79118 |
| C  | -2.26412 | 0.83786  | -0.33179 |
| C  | -3.60194 | 1.09853  | -0.08709 |
| Cl | -4.24024 | 2.69744  | -0.39456 |
| C  | -4.44604 | 0.10165  | 0.39611  |
| C  | -3.92927 | -1.16314 | 0.63902  |
| H  | -2.74126 | -3.25941 | 1.02645  |
| H  | 2.38630  | 0.26134  | -1.39680 |
| H  | 3.63413  | -0.96074 | 0.42040  |
| H  | 1.25468  | -0.52696 | 1.89188  |
| H  | 3.62852  | 0.99616  | 2.03957  |
| H  | 2.30530  | 1.70993  | 1.12047  |
| H  | 5.10048  | 3.28789  | -0.20322 |
| H  | 1.44389  | -1.64957 | -2.31337 |
| H  | 3.30668  | -2.83012 | -1.15467 |
| H  | 2.28676  | -3.02203 | 0.29377  |
| H  | 1.84877  | -3.82909 | -1.23326 |
| H  | -1.60678 | 1.61383  | -0.71153 |
| H  | -5.49514 | 0.31103  | 0.58372  |
| H  | -4.57433 | -1.94801 | 1.02804  |

**1c** NMR Conformer 15

Energy: -875534.1408816

|    |          |          |          |
|----|----------|----------|----------|
| O  | -1.30672 | 2.66233  | -0.30209 |
| C  | -2.21334 | 1.67769  | -0.19343 |
| C  | -1.85498 | 0.31581  | -0.15816 |
| C  | -0.44516 | -0.05904 | -0.24574 |
| N  | 0.51633  | 0.77860  | -0.38314 |
| C  | 1.77364  | 0.01395  | -0.36284 |
| C  | 2.56821  | 0.47456  | 0.87746  |
| O  | 2.80400  | 1.87108  | 0.77953  |
| C  | 3.94889  | -0.15959 | 1.07557  |
| C  | 4.74796  | -0.24228 | -0.20241 |
| O  | 5.82451  | 0.54723  | -0.20663 |
| O  | 4.44859  | -0.95674 | -1.13863 |
| C  | 1.29137  | -1.46081 | -0.45571 |
| C  | 1.86173  | -2.50797 | 0.47527  |
| O  | -0.13898 | -1.36370 | -0.19027 |
| C  | -2.84262 | -0.67080 | -0.04002 |
| C  | -4.17069 | -0.29587 | 0.04473  |
| Cl | -5.40723 | -1.52393 | 0.19164  |
| C  | -4.54158 | 1.05141  | 0.01530  |
| C  | -3.56615 | 2.02963  | -0.10302 |
| H  | -0.40427 | 2.26084  | -0.35519 |
| H  | 2.35464  | 0.27835  | -1.25038 |
| H  | 1.97163  | 0.26294  | 1.77829  |
| H  | 1.96026  | 2.31468  | 0.59455  |
| H  | 3.85383  | -1.17471 | 1.46402  |
| H  | 4.48220  | 0.44011  | 1.81536  |
| H  | 6.29746  | 0.43786  | -1.05760 |
| H  | 1.38208  | -1.79771 | -1.49361 |
| H  | 2.90060  | -2.71306 | 0.20859  |
| H  | 1.80173  | -2.19296 | 1.52053  |
| H  | 1.29154  | -3.43307 | 0.36341  |
| H  | -2.55634 | -1.71775 | -0.01741 |
| H  | -5.58952 | 1.32750  | 0.08385  |
| H  | -3.83207 | 3.08181  | -0.12771 |

**1c** NMR Conformer 14

Energy: -875537.7637636

|   |          |          |          |
|---|----------|----------|----------|
| O | -1.35382 | 2.62646  | 0.01411  |
| C | -2.29233 | 1.66662  | 0.04022  |
| C | -1.99245 | 0.30043  | -0.14126 |
| C | -0.60904 | -0.10684 | -0.38027 |
| N | 0.39689  | 0.68875  | -0.39336 |
| C | 1.56459  | -0.11689 | -0.77862 |
| C | 2.81088  | 0.32954  | -0.01620 |
| O | 3.02255  | 1.71728  | -0.20459 |
| C | 4.05880  | -0.35909 | -0.54390 |
| C | 5.25217  | -0.12255 | 0.35124  |
| O | 6.40464  | -0.19469 | -0.32198 |
| O | 5.19480  | 0.07589  | 1.54498  |

|    |          |          |          |
|----|----------|----------|----------|
| C  | 1.07984  | -1.56737 | -0.54068 |
| C  | 1.39564  | -2.17148 | 0.81800  |
| O  | -0.36779 | -1.41095 | -0.62069 |
| C  | -3.01533 | -0.65674 | -0.09858 |
| C  | -4.31870 | -0.25063 | 0.12037  |
| Cl | -5.59754 | -1.44233 | 0.17763  |
| C  | -4.63064 | 1.09976  | 0.29866  |
| C  | -3.62201 | 2.04951  | 0.25753  |
| H  | -0.47069 | 2.20804  | -0.14630 |
| H  | 1.74759  | 0.05366  | -1.85041 |
| H  | 2.69103  | 0.11350  | 1.05369  |
| H  | 2.26682  | 2.19961  | 0.17174  |
| H  | 4.28245  | -0.00027 | -1.55314 |
| H  | 3.92366  | -1.44630 | -0.60996 |
| H  | 7.14918  | -0.07966 | 0.30622  |
| H  | 1.36862  | -2.23733 | -1.35337 |
| H  | 2.46886  | -2.34273 | 0.93932  |
| H  | 1.05437  | -1.51438 | 1.62376  |
| H  | 0.88485  | -3.13217 | 0.91234  |
| H  | -2.77412 | -1.70629 | -0.23702 |
| H  | -5.66019 | 1.40154  | 0.46907  |
| H  | -3.84407 | 3.10357  | 0.39430  |

**1c NMR Conformer 13**

Energy: -875531.6743992

|    |          |          |          |
|----|----------|----------|----------|
| O  | 2.33325  | 2.83921  | -0.36673 |
| C  | 2.75527  | 1.56175  | -0.25534 |
| C  | 1.91078  | 0.44102  | -0.14575 |
| C  | 0.44235  | 0.53349  | -0.12391 |
| N  | -0.37116 | -0.42008 | 0.09848  |
| C  | -1.72089 | 0.13789  | -0.09066 |
| C  | -2.68676 | -0.50335 | 0.90508  |
| O  | -2.64887 | -1.91016 | 0.75689  |
| C  | -4.15014 | -0.08730 | 0.71867  |
| C  | -4.70727 | -0.59827 | -0.58883 |
| O  | -5.60874 | -1.56838 | -0.42573 |
| O  | -4.38237 | -0.17665 | -1.67999 |
| C  | -1.50527 | 1.66201  | 0.01028  |
| C  | -1.64175 | 2.28172  | 1.39159  |
| O  | -0.10051 | 1.76163  | -0.37658 |
| C  | 2.47602  | -0.83995 | -0.03735 |
| C  | 3.84733  | -0.99643 | -0.03463 |
| Cl | 4.53650  | -2.59800 | 0.09743  |
| C  | 4.69472  | 0.10975  | -0.14030 |
| C  | 4.14530  | 1.37495  | -0.24996 |
| H  | 1.36129  | 2.88684  | -0.37892 |
| H  | -2.05066 | -0.12645 | -1.10355 |
| H  | -2.38353 | -0.22510 | 1.92479  |
| H  | -1.71919 | -2.19332 | 0.80274  |

|   |          |          |          |
|---|----------|----------|----------|
| H | -4.23830 | 1.00320  | 0.71154  |
| H | -4.73896 | -0.48374 | 1.54773  |
| H | -5.92408 | -1.85981 | -1.30762 |
| H | -2.07850 | 2.21238  | -0.73897 |
| H | -2.67947 | 2.26466  | 1.73476  |
| H | -1.02478 | 1.74631  | 2.11991  |
| H | -1.31481 | 3.32346  | 1.35623  |
| H | 1.81537  | -1.69784 | 0.04206  |
| H | 5.77263  | -0.02451 | -0.13847 |
| H | 4.78046  | 2.25168  | -0.33421 |

**1c NMR Conformer 11**

Energy: -875532.4154000

|    |          |          |          |
|----|----------|----------|----------|
| O  | 2.35257  | 2.84812  | -0.30986 |
| C  | 2.65071  | 1.53602  | -0.19968 |
| C  | 1.70612  | 0.49235  | -0.20069 |
| C  | 0.25549  | 0.71467  | -0.32554 |
| N  | -0.62855 | -0.18875 | -0.49367 |
| C  | -1.93404 | 0.48462  | -0.45302 |
| C  | -2.66823 | 0.07455  | 0.83450  |
| O  | -1.89715 | 0.36610  | 1.98338  |
| C  | -3.04906 | -1.41123 | 0.81713  |
| C  | -3.97686 | -1.79388 | -0.30741 |
| O  | -4.96364 | -0.90323 | -0.47576 |
| O  | -3.87269 | -2.79312 | -0.98506 |
| C  | -1.58724 | 1.98930  | -0.57282 |
| C  | -2.32676 | 2.97366  | 0.30574  |
| O  | -0.17035 | 2.00300  | -0.23835 |
| C  | 2.14678  | -0.83626 | -0.09067 |
| C  | 3.49418  | -1.11503 | 0.01957  |
| Cl | 4.02647  | -2.77478 | 0.16043  |
| C  | 4.44013  | -0.08665 | 0.02300  |
| C  | 4.01368  | 1.22532  | -0.08672 |
| H  | 1.39058  | 2.98442  | -0.36265 |
| H  | -2.54016 | 0.17454  | -1.31244 |
| H  | -3.57951 | 0.67448  | 0.92413  |
| H  | -1.07817 | -0.16021 | 1.95683  |
| H  | -3.55874 | -1.64301 | 1.75969  |
| H  | -2.15597 | -2.03665 | 0.74354  |
| H  | -5.54685 | -1.20549 | -1.20402 |
| H  | -1.64929 | 2.29217  | -1.62464 |
| H  | -3.38622 | 2.98274  | 0.03304  |
| H  | -2.22859 | 2.70275  | 1.35850  |
| H  | -1.93122 | 3.98031  | 0.15119  |
| H  | 1.40885  | -1.63268 | -0.09275 |
| H  | 5.49809  | -0.31606 | 0.11154  |
| H  | 4.72768  | 2.04349  | -0.08859 |

**1c NMR Conformer 10**

Energy: -875535.7417336

|    |          |          |          |
|----|----------|----------|----------|
| O  | -1.22394 | 2.63673  | 0.18896  |
| C  | -2.16525 | 1.68723  | 0.06920  |
| C  | -1.85755 | 0.31642  | -0.05056 |
| C  | -0.46111 | -0.11619 | -0.04697 |
| N  | 0.54850  | 0.65875  | 0.11483  |
| C  | 1.74672  | -0.17665 | -0.07360 |
| C  | 2.86743  | 0.27520  | 0.86189  |
| O  | 3.16190  | 1.64121  | 0.63309  |
| C  | 4.18377  | -0.48467 | 0.66716  |
| C  | 4.78927  | -0.20401 | -0.68773 |
| O  | 5.90115  | 0.52991  | -0.62156 |
| O  | 4.32393  | -0.60123 | -1.73599 |
| C  | 1.19988  | -1.60742 | 0.11227  |
| C  | 1.24211  | -2.17297 | 1.52257  |
| O  | -0.20718 | -1.42630 | -0.23669 |
| C  | -2.88583 | -0.62709 | -0.17759 |
| C  | -4.20129 | -0.20342 | -0.18459 |
| Cl | -5.48644 | -1.37963 | -0.34150 |
| C  | -4.52098 | 1.15150  | -0.06721 |
| C  | -3.50706 | 2.08767  | 0.05838  |
| H  | -0.33166 | 2.20858  | 0.16532  |
| H  | 2.08825  | -0.03849 | -1.10707 |
| H  | 2.54425  | 0.12903  | 1.90270  |
| H  | 2.34176  | 2.15549  | 0.72494  |
| H  | 4.01478  | -1.56326 | 0.73445  |
| H  | 4.88130  | -0.18703 | 1.45203  |
| H  | 6.23765  | 0.67967  | -1.53036 |
| H  | 1.62035  | -2.30495 | -0.61537 |
| H  | 2.26755  | -2.37297 | 1.84430  |
| H  | 0.78327  | -1.47781 | 2.23252  |
| H  | 0.68829  | -3.11393 | 1.55006  |
| H  | -2.63885 | -1.68057 | -0.26758 |
| H  | -5.56038 | 1.46689  | -0.07516 |
| H  | -3.73412 | 3.14564  | 0.14909  |

**1c** NMR Conformer 9

Energy: -875529.8919460

|   |          |          |          |
|---|----------|----------|----------|
| O | 1.84815  | 2.92772  | -0.02161 |
| C | 2.48416  | 1.73716  | -0.01260 |
| C | 1.85224  | 0.48478  | -0.12985 |
| C | 0.39664  | 0.32338  | -0.27018 |
| N | -0.24489 | -0.77604 | -0.24377 |
| C | -1.65260 | -0.45078 | -0.52869 |
| C | -2.56225 | -1.38354 | 0.28588  |
| O | -2.09298 | -2.71215 | 0.16100  |
| C | -4.00834 | -1.44128 | -0.22562 |
| C | -4.78394 | -0.17189 | 0.00602  |
| O | -4.67852 | 0.68805  | -1.01495 |

|    |          |          |          |
|----|----------|----------|----------|
| O  | -5.41616 | 0.07552  | 1.01047  |
| C  | -1.73087 | 1.07400  | -0.27209 |
| C  | -2.13531 | 1.51371  | 1.12500  |
| O  | -0.33342 | 1.45761  | -0.45903 |
| C  | 2.62905  | -0.68490 | -0.10257 |
| C  | 3.99938  | -0.60582 | 0.04140  |
| Cl | 4.95360  | -2.07050 | 0.07320  |
| C  | 4.63664  | 0.63230  | 0.15965  |
| C  | 3.87826  | 1.78931  | 0.13147  |
| H  | 0.89015  | 2.81308  | -0.14619 |
| H  | -1.83222 | -0.66123 | -1.59428 |
| H  | -2.55299 | -1.08273 | 1.34411  |
| H  | -1.13098 | -2.70170 | 0.30436  |
| H  | -4.51450 | -2.24041 | 0.31972  |
| H  | -3.99277 | -1.68329 | -1.29203 |
| H  | -5.19346 | 1.49846  | -0.80944 |
| H  | -2.30167 | 1.59326  | -1.04142 |
| H  | -3.18511 | 1.29141  | 1.33114  |
| H  | -1.52038 | 1.01502  | 1.88091  |
| H  | -1.99354 | 2.59305  | 1.21774  |
| H  | 2.13153  | -1.64515 | -0.19811 |
| H  | 5.71593  | 0.68421  | 0.27032  |
| H  | 4.34807  | 2.76418  | 0.22119  |

**1c** NMR Conformer 8

Energy: -875536.2261395

|    |          |          |          |
|----|----------|----------|----------|
| O  | 0.69984  | -2.41818 | 0.51421  |
| C  | 1.76688  | -1.63275 | 0.28940  |
| C  | 1.65079  | -0.27234 | -0.05663 |
| C  | 0.32409  | 0.32471  | -0.20178 |
| N  | -0.77670 | -0.30642 | -0.01045 |
| C  | -1.86888 | 0.62165  | -0.31296 |
| C  | -2.94117 | 0.54669  | 0.78174  |
| O  | -2.38622 | 0.72233  | 2.06724  |
| C  | -3.69353 | -0.79145 | 0.72060  |
| C  | -4.40198 | -1.02026 | -0.58751 |
| O  | -5.09004 | 0.06026  | -0.97777 |
| O  | -4.35383 | -2.03786 | -1.24217 |
| C  | -1.15712 | 1.99079  | -0.52329 |
| C  | -1.31146 | 3.05739  | 0.54579  |
| O  | 0.24963  | 1.60950  | -0.58300 |
| C  | 2.79962  | 0.49997  | -0.27311 |
| C  | 4.04694  | -0.08318 | -0.14622 |
| Cl | 5.48158  | 0.87707  | -0.41579 |
| C  | 4.17541  | -1.43204 | 0.19247  |
| C  | 3.04110  | -2.19865 | 0.40733  |
| H  | -0.12418 | -1.88052 | 0.39868  |
| H  | -2.32967 | 0.31297  | -1.26303 |
| H  | -3.65674 | 1.36312  | 0.64416  |

|   |          |          |          |
|---|----------|----------|----------|
| H | -1.71403 | 0.03263  | 2.21242  |
| H | -4.44357 | -0.79303 | 1.51952  |
| H | -3.00820 | -1.62732 | 0.88415  |
| H | -5.53383 | -0.13173 | -1.82985 |
| H | -1.40355 | 2.40157  | -1.50558 |
| H | -2.35916 | 3.35812  | 0.63536  |
| H | -0.97696 | 2.68860  | 1.51651  |
| H | -0.72496 | 3.93575  | 0.26570  |
| H | 2.70141  | 1.54799  | -0.54007 |
| H | 5.16228  | -1.87646 | 0.28775  |
| H | 3.12209  | -3.24854 | 0.67261  |

**1c NMR Conformer 7**

Energy: -875533.8523904

|    |          |          |          |
|----|----------|----------|----------|
| O  | -1.54680 | 2.72468  | 0.01597  |
| C  | -2.34725 | 1.64639  | 0.01405  |
| C  | -1.85509 | 0.33009  | -0.10279 |
| C  | -0.41716 | 0.10520  | -0.24164 |
| N  | 0.47624  | 1.02523  | -0.20944 |
| C  | 1.76423  | 0.37757  | -0.51068 |
| C  | 2.89008  | 1.03866  | 0.29917  |
| O  | 2.79040  | 2.44517  | 0.18080  |
| C  | 4.29594  | 0.72118  | -0.23010 |
| C  | 4.72033  | -0.70890 | -0.02488 |
| O  | 4.38925  | -1.49571 | -1.05615 |
| O  | 5.27840  | -1.12556 | 0.96736  |
| C  | 1.45598  | -1.12160 | -0.26469 |
| C  | 1.75042  | -1.65874 | 1.12620  |
| O  | 0.00656  | -1.15624 | -0.43603 |
| C  | -2.74113 | -0.75589 | -0.09695 |
| C  | -4.09906 | -0.52622 | 0.02378  |
| Cl | -5.20626 | -1.87984 | 0.03208  |
| C  | -4.60069 | 0.77287  | 0.13914  |
| C  | -3.72795 | 1.84973  | 0.13324  |
| H  | -0.60757 | 2.42793  | -0.07626 |
| H  | 1.97950  | 0.54851  | -1.57649 |
| H  | 2.81318  | 0.74540  | 1.35636  |
| H  | 1.89531  | 2.71256  | 0.45020  |
| H  | 4.99795  | 1.35361  | 0.31687  |
| H  | 4.33350  | 0.97429  | -1.29348 |
| H  | 4.68085  | -2.41459 | -0.86943 |
| H  | 1.87738  | -1.75917 | -1.04130 |
| H  | 2.82356  | -1.70992 | 1.32478  |
| H  | 1.28569  | -1.02791 | 1.89070  |
| H  | 1.34025  | -2.66740 | 1.21289  |
| H  | -2.35238 | -1.76561 | -0.18715 |
| H  | -5.67060 | 0.93570  | 0.23295  |
| H  | -4.09815 | 2.86669  | 0.22148  |

**1c NMR Conformer 6**

Energy: -875529.9378044

|    |          |          |          |
|----|----------|----------|----------|
| O  | 1.84601  | 2.92454  | -0.05353 |
| C  | 2.48455  | 1.73541  | -0.02731 |
| C  | 1.85368  | 0.48195  | -0.13633 |
| C  | 0.39842  | 0.32158  | -0.27967 |
| N  | -0.24430 | -0.77740 | -0.24553 |
| C  | -1.64826 | -0.45076 | -0.54378 |
| C  | -2.57078 | -1.38123 | 0.25693  |
| O  | -2.10586 | -2.71149 | 0.13807  |
| C  | -4.00614 | -1.42222 | -0.28273 |
| C  | -4.72551 | -0.10608 | -0.15825 |
| O  | -5.35988 | 0.02366  | 1.01205  |
| O  | -4.71195 | 0.76778  | -0.99971 |
| C  | -1.72837 | 1.07093  | -0.28243 |
| C  | -2.11715 | 1.50188  | 1.12192  |
| O  | -0.33085 | 1.45497  | -0.48062 |
| C  | 2.62997  | -0.68727 | -0.09524 |
| C  | 3.99935  | -0.60566 | 0.05543  |
| Cl | 4.95497  | -2.06845 | 0.10499  |
| C  | 4.63537  | 0.63393  | 0.16674  |
| C  | 3.87745  | 1.79066  | 0.12428  |
| H  | 0.88936  | 2.80395  | -0.18473 |
| H  | -1.81665 | -0.65509 | -1.61252 |
| H  | -2.57443 | -1.08038 | 1.31513  |
| H  | -1.14717 | -2.70490 | 0.30199  |
| H  | -4.54962 | -2.19055 | 0.27165  |
| H  | -3.97073 | -1.69496 | -1.34079 |
| H  | -5.80032 | 0.89943  | 1.04561  |
| H  | -2.31016 | 1.59347  | -1.04138 |
| H  | -3.16422 | 1.27715  | 1.33775  |
| H  | -1.49398 | 0.99831  | 1.86798  |
| H  | -1.97631 | 2.58083  | 1.21966  |
| H  | 2.13384  | -1.64881 | -0.18465 |
| H  | 5.71407  | 0.68610  | 0.28302  |
| H  | 4.34659  | 2.76638  | 0.20775  |

**1c NMR Conformer 5**

Energy: -875534.0240582

|   |          |          |          |
|---|----------|----------|----------|
| O | -1.55562 | 2.72650  | 0.03545  |
| C | -2.35183 | 1.64650  | 0.02949  |
| C | -1.85871 | 0.33259  | -0.10437 |
| C | -0.42191 | 0.10492  | -0.24914 |
| N | 0.47278  | 1.02488  | -0.21093 |
| C | 1.75825  | 0.37683  | -0.52054 |
| C | 2.89373  | 1.02819  | 0.28505  |
| O | 2.79846  | 2.43665  | 0.19792  |
| C | 4.28601  | 0.71425  | -0.28268 |
| C | 4.65543  | -0.74225 | -0.20540 |

|    |          |          |          |   |          |          |          |
|----|----------|----------|----------|---|----------|----------|----------|
| O  | 5.25460  | -1.06107 | 0.94646  | H | -2.79564 | -0.65858 | 1.55434  |
| O  | 4.42354  | -1.55697 | -1.07401 | H | -1.09226 | -2.32383 | 0.84819  |
| C  | 1.45066  | -1.11949 | -0.27371 | H | -4.53011 | -2.13701 | 0.52328  |
| C  | 1.73726  | -1.65215 | 1.12018  | H | -3.79143 | -1.92473 | -1.05257 |
| O  | -0.00206 | -1.15544 | -0.44854 | H | -6.52902 | 0.26399  | -1.00836 |
| C  | -2.74328 | -0.75452 | -0.10803 | H | -2.27845 | 1.79818  | -0.73368 |
| C  | -4.09990 | -0.52777 | 0.02238  | H | -2.92932 | 1.59646  | 1.68235  |
| Cl | -5.20650 | -1.88301 | 0.01831  | H | -1.25216 | 1.16224  | 2.10019  |
| C  | -4.60338 | 0.76868  | 0.15813  | H | -1.62704 | 2.77991  | 1.47185  |
| C  | -3.73215 | 1.84602  | 0.16057  | H | 2.05319  | -1.67051 | -0.17690 |
| H  | -0.61848 | 2.43169  | -0.08321 | H | 5.77386  | 0.48030  | 0.00236  |
| H  | 1.96469  | 0.54828  | -1.58762 | H | 4.51220  | 2.62926  | -0.01683 |
| H  | 2.83397  | 0.71346  | 1.33739  |   |          |          |          |
| H  | 1.90820  | 2.70372  | 0.48075  |   |          |          |          |
| H  | 5.01198  | 1.30684  | 0.27767  |   |          |          |          |
| H  | 4.30442  | 1.01648  | -1.33298 |   |          |          |          |
| H  | 5.47102  | -2.01723 | 0.94473  |   |          |          |          |
| H  | 1.87615  | -1.75934 | -1.04597 |   |          |          |          |
| H  | 2.80867  | -1.69423 | 1.32955  |   |          |          |          |
| H  | 1.26073  | -1.02358 | 1.87894  |   |          |          |          |
| H  | 1.33519  | -2.66407 | 1.20475  |   |          |          |          |
| H  | -2.35338 | -1.76243 | -0.21216 |   |          |          |          |
| H  | -5.67282 | 0.92745  | 0.26021  |   |          |          |          |
| H  | -4.10175 | 2.86172  | 0.26333  |   |          |          |          |

**1c NMR Conformer 4**

Energy: -875529.4905031

|    |          |          |          |
|----|----------|----------|----------|
| O  | 2.00817  | 2.91215  | -0.11369 |
| C  | 2.58838  | 1.69280  | -0.10736 |
| C  | 1.88841  | 0.47275  | -0.14841 |
| C  | 0.41926  | 0.39235  | -0.18110 |
| N  | -0.27515 | -0.66861 | -0.05976 |
| C  | -1.67963 | -0.27474 | -0.27539 |
| C  | -2.62331 | -1.14669 | 0.58608  |
| O  | -2.05562 | -2.42646 | 0.79377  |
| C  | -3.96246 | -1.42870 | -0.08945 |
| C  | -4.82587 | -0.22144 | -0.32844 |
| O  | -6.00700 | -0.55033 | -0.86026 |
| O  | -4.50801 | 0.92531  | -0.08847 |
| C  | -1.66037 | 1.24984  | -0.02492 |
| C  | -1.88296 | 1.72011  | 1.40063  |
| O  | -0.26111 | 1.55512  | -0.36304 |
| C  | 2.60436  | -0.73611 | -0.13941 |
| C  | 3.98271  | -0.72301 | -0.08530 |
| Cl | 4.86457  | -2.23308 | -0.07712 |
| C  | 4.68897  | 0.48379  | -0.03923 |
| C  | 3.99050  | 1.67764  | -0.05098 |
| H  | 1.04049  | 2.83380  | -0.17622 |
| H  | -1.90531 | -0.46476 | -1.33547 |

**1c NMR Conformer 3**

Energy: -875533.3646963

|    |          |          |          |
|----|----------|----------|----------|
| O  | -1.44764 | 2.67149  | -0.06852 |
| C  | -2.30574 | 1.63847  | -0.08407 |
| C  | -1.87758 | 0.29680  | -0.10067 |
| C  | -0.44610 | -0.00217 | -0.12231 |
| N  | 0.47743  | 0.88963  | -0.08288 |
| C  | 1.75447  | 0.17598  | -0.27386 |
| C  | 2.89578  | 0.84803  | 0.52627  |
| O  | 2.65204  | 2.23262  | 0.68101  |
| C  | 4.24226  | 0.78815  | -0.18857 |
| C  | 4.80614  | -0.59398 | -0.36354 |
| O  | 5.99930  | -0.57417 | -0.96494 |
| O  | 4.26072  | -1.62050 | -0.01391 |
| C  | 1.37821  | -1.28407 | 0.07530  |
| C  | 1.53606  | -1.71309 | 1.52226  |
| O  | -0.06495 | -1.28424 | -0.21181 |
| C  | -2.81765 | -0.74380 | -0.11501 |
| C  | -4.16610 | -0.44046 | -0.11117 |
| Cl | -5.34412 | -1.73513 | -0.13163 |
| C  | -4.60687 | 0.88625  | -0.09343 |
| C  | -3.67970 | 1.91649  | -0.08019 |
| H  | -0.52238 | 2.32161  | -0.08876 |
| H  | 1.99636  | 0.24077  | -1.34536 |
| H  | 2.98676  | 0.37561  | 1.51285  |
| H  | 1.72937  | 2.35307  | 0.95239  |
| H  | 4.97339  | 1.38455  | 0.36733  |
| H  | 4.15368  | 1.25519  | -1.17719 |
| H  | 6.32298  | -1.49230 | -1.06464 |
| H  | 1.82714  | -2.00362 | -0.60644 |
| H  | 2.59166  | -1.84275 | 1.76552  |
| H  | 1.09474  | -0.97660 | 2.20157  |
| H  | 1.02476  | -2.66732 | 1.66725  |
| H  | -2.47631 | -1.77404 | -0.12979 |
| H  | -5.67061 | 1.10410  | -0.09069 |
| H  | -3.99816 | 2.95429  | -0.06695 |

**1c NMR Conformer 2**

Energy: -875532.5727857

|    |          |          |          |
|----|----------|----------|----------|
| O  | -2.50030 | -2.75622 | -0.52402 |
| C  | -2.76470 | -1.44514 | -0.34124 |
| C  | -1.79013 | -0.43830 | -0.21118 |
| C  | -0.34164 | -0.70138 | -0.25780 |
| N  | 0.57957  | 0.14504  | -0.02196 |
| C  | 1.85698  | -0.54205 | -0.25735 |
| C  | 2.86307  | -0.16158 | 0.83749  |
| O  | 2.30545  | -0.30926 | 2.12797  |
| C  | 3.36216  | 1.27103  | 0.64455  |
| C  | 4.29188  | 1.42662  | -0.53050 |
| O  | 4.60784  | 2.70650  | -0.75313 |
| O  | 4.72843  | 0.51439  | -1.20079 |
| C  | 1.48132  | -2.04147 | -0.38204 |
| C  | 1.73730  | -2.94354 | 0.81080  |
| O  | 0.03849  | -1.96384 | -0.59688 |
| C  | -2.19618 | 0.89245  | -0.02188 |
| C  | -3.53855 | 1.20786  | 0.03774  |
| Cl | -4.02835 | 2.87042  | 0.26917  |
| C  | -4.51424 | 0.21548  | -0.08958 |
| C  | -4.12207 | -1.09804 | -0.27748 |
| H  | -1.54177 | -2.91551 | -0.57390 |
| H  | 2.26002  | -0.19414 | -1.21722 |
| H  | 3.72020  | -0.84194 | 0.79168  |
| H  | 1.47211  | 0.19372  | 2.15785  |
| H  | 3.91093  | 1.58355  | 1.54037  |
| H  | 2.52181  | 1.96544  | 0.52720  |
| H  | 5.22837  | 2.75519  | -1.51061 |
| H  | 1.90225  | -2.47498 | -1.29205 |
| H  | 2.81034  | -3.00778 | 1.01194  |
| H  | 1.24530  | -2.55885 | 1.70557  |
| H  | 1.36812  | -3.94864 | 0.59256  |
| H  | -1.43632 | 1.66204  | 0.07267  |
| H  | -5.56807 | 0.47457  | -0.04317 |
| H  | -4.85874 | -1.88932 | -0.37947 |

**1b NMR Conformer 19**

Energy: -875526.2154182

|   |          |          |          |
|---|----------|----------|----------|
| O | -0.83770 | -2.75189 | -0.25299 |
| C | -1.63405 | -1.66181 | -0.19974 |
| C | -1.21474 | -0.34505 | -0.46269 |
| C | 0.16780  | 0.00317  | -0.82778 |
| N | 0.64824  | 1.18095  | -0.91608 |
| C | 2.09204  | 1.01896  | -1.15644 |
| C | 2.89682  | 1.41398  | 0.10728  |
| O | 3.15284  | 2.80994  | 0.08772  |

|    |          |          |          |
|----|----------|----------|----------|
| C  | 2.23519  | 1.07875  | 1.45973  |
| C  | 2.09340  | -0.39093 | 1.76932  |
| O  | 0.82247  | -0.77638 | 1.93247  |
| O  | 3.03158  | -1.15095 | 1.90222  |
| C  | 2.19852  | -0.42787 | -1.67379 |
| C  | 3.43246  | -1.24716 | -1.37597 |
| O  | 1.01470  | -1.03475 | -1.08706 |
| C  | -2.13725 | 0.70798  | -0.34936 |
| C  | -3.44655 | 0.45060  | 0.00643  |
| Cl | -4.58536 | 1.77234  | 0.13377  |
| C  | -3.87584 | -0.85408 | 0.26543  |
| C  | -2.96946 | -1.89581 | 0.16263  |
| H  | 0.06034  | -2.51789 | -0.54060 |
| H  | 2.41996  | 1.70814  | -1.94116 |
| H  | 3.88235  | 0.93769  | 0.05724  |
| H  | 2.30838  | 3.28509  | -0.00231 |
| H  | 1.26308  | 1.57067  | 1.52414  |
| H  | 2.89568  | 1.49270  | 2.22738  |
| H  | 0.80479  | -1.73173 | 2.15201  |
| H  | 2.01301  | -0.41254 | -2.75501 |
| H  | 3.61190  | -1.34401 | -0.30438 |
| H  | 3.33170  | -2.24440 | -1.80997 |
| H  | 4.30089  | -0.76659 | -1.83693 |
| H  | -1.79937 | 1.72038  | -0.54744 |
| H  | -4.90736 | -1.04688 | 0.54448  |
| H  | -3.27308 | -2.91908 | 0.36190  |

**1b NMR Conformer 18**

Energy: -875536.3383759

|    |          |          |          |
|----|----------|----------|----------|
| O  | -0.40391 | 2.25349  | -0.40999 |
| C  | -1.49449 | 1.48353  | -0.25604 |
| C  | -1.43548 | 0.07554  | -0.22870 |
| C  | -0.14195 | -0.58955 | -0.37830 |
| N  | 0.97779  | 0.02364  | -0.50170 |
| C  | 2.00743  | -0.99895 | -0.71690 |
| C  | 3.28193  | -0.69037 | 0.06231  |
| O  | 4.21252  | -1.67763 | -0.34145 |
| C  | 3.78681  | 0.72308  | -0.25763 |
| C  | 2.99845  | 1.77584  | 0.48232  |
| O  | 2.60013  | 2.78361  | -0.30273 |
| O  | 2.78213  | 1.74981  | 1.67504  |
| C  | 1.28818  | -2.32357 | -0.35620 |
| C  | 1.55943  | -2.88212 | 1.02682  |
| O  | -0.11986 | -1.93316 | -0.41692 |
| C  | -2.60679 | -0.67566 | -0.06243 |
| C  | -3.81876 | -0.02489 | 0.07582  |
| Cl | -5.28308 | -0.95924 | 0.28338  |
| C  | -3.89205 | 1.36991  | 0.05282  |
| C  | -2.73572 | 2.11576  | -0.11240 |

|   |          |          |          |
|---|----------|----------|----------|
| H | 0.39148  | 1.67235  | -0.51646 |
| H | 2.28189  | -0.99592 | -1.78259 |
| H | 3.09230  | -0.75183 | 1.14166  |
| H | 4.97939  | -1.66561 | 0.25660  |
| H | 3.77164  | 0.91424  | -1.33396 |
| H | 4.82298  | 0.80761  | 0.09132  |
| H | 2.14396  | 3.45501  | 0.24916  |
| H | 1.43256  | -3.08528 | -1.12440 |
| H | 1.33422  | -2.13904 | 1.79858  |
| H | 0.93283  | -3.76053 | 1.19687  |
| H | 2.60890  | -3.17630 | 1.11102  |
| H | -2.55025 | -1.75986 | -0.04313 |
| H | -4.85262 | 1.86552  | 0.16333  |
| H | -2.77138 | 3.20096  | -0.13406 |

**1b NMR Conformer 17**

Energy: -875533.1031127

|    |          |          |          |
|----|----------|----------|----------|
| O  | -2.49119 | -2.80743 | -0.51710 |
| C  | -2.75258 | -1.49890 | -0.31198 |
| C  | -1.77519 | -0.49718 | -0.16227 |
| C  | -0.32770 | -0.76421 | -0.20599 |
| N  | 0.59772  | 0.07523  | 0.03836  |
| C  | 1.86637  | -0.61974 | -0.22045 |
| C  | 2.93564  | -0.25606 | 0.81180  |
| O  | 4.12744  | -0.97971 | 0.55890  |
| C  | 3.17730  | 1.25155  | 0.89605  |
| C  | 3.73553  | 1.84971  | -0.37000 |
| O  | 3.64625  | 3.17974  | -0.38613 |
| O  | 4.23988  | 1.21386  | -1.27641 |
| C  | 1.47985  | -2.11758 | -0.25996 |
| C  | 1.64825  | -2.89477 | 1.03192  |
| O  | 0.05162  | -2.02791 | -0.55368 |
| C  | -2.17798 | 0.83105  | 0.05010  |
| C  | -3.51962 | 1.14953  | 0.11354  |
| Cl | -4.00405 | 2.80917  | 0.37681  |
| C  | -4.49791 | 0.16262  | -0.03301 |
| C  | -4.10890 | -1.14855 | -0.24431 |
| H  | -1.53248 | -2.96795 | -0.56377 |
| H  | 2.22646  | -0.30871 | -1.21168 |
| H  | 2.59205  | -0.57916 | 1.80045  |
| H  | 4.49864  | -0.66224 | -0.28187 |
| H  | 3.90560  | 1.45644  | 1.69042  |
| H  | 2.25389  | 1.77427  | 1.15823  |
| H  | 4.05707  | 3.52003  | -1.20978 |
| H  | 1.93933  | -2.63917 | -1.10107 |
| H  | 1.11916  | -2.40219 | 1.85403  |
| H  | 1.24115  | -3.90135 | 0.91145  |
| H  | 2.70841  | -2.96959 | 1.28531  |
| H  | -1.41574 | 1.59616  | 0.16105  |

|   |          |          |          |
|---|----------|----------|----------|
| H | -5.55118 | 0.42331  | 0.01704  |
| H | -4.84790 | -1.93556 | -0.36140 |

**1b NMR Conformer 16**

Energy: -875533.5766502

|    |          |          |          |
|----|----------|----------|----------|
| O  | 0.37681  | -2.17228 | -1.28810 |
| C  | 1.35293  | -1.36412 | -0.84711 |
| C  | 1.14005  | -0.00507 | -0.52389 |
| C  | -0.19709 | 0.57429  | -0.66125 |
| N  | -1.22131 | -0.04802 | -1.12274 |
| C  | -2.38209 | 0.84165  | -0.95957 |
| C  | -3.34192 | 0.31135  | 0.13271  |
| O  | -4.22210 | -0.66383 | -0.38459 |
| C  | -2.59511 | -0.17485 | 1.38520  |
| C  | -1.82885 | -1.46143 | 1.17520  |
| O  | -0.62523 | -1.43718 | 1.75549  |
| O  | -2.27478 | -2.45591 | 0.63303  |
| C  | -1.71953 | 2.21278  | -0.67980 |
| C  | -2.33694 | 3.13476  | 0.34808  |
| O  | -0.37937 | 1.84130  | -0.24820 |
| C  | 2.20125  | 0.78007  | -0.05158 |
| C  | 3.45532  | 0.21497  | 0.09238  |
| Cl | 4.78101  | 1.19449  | 0.68037  |
| C  | 3.68282  | -1.12749 | -0.22556 |
| C  | 2.63629  | -1.90900 | -0.69185 |
| H  | -0.46517 | -1.65288 | -1.35784 |
| H  | -2.95327 | 0.87934  | -1.89136 |
| H  | -3.98653 | 1.14253  | 0.43474  |
| H  | -3.74114 | -1.50181 | -0.47910 |
| H  | -3.31565 | -0.36262 | 2.19011  |
| H  | -1.89762 | 0.58951  | 1.74017  |
| H  | -0.20007 | -2.31285 | 1.64000  |
| H  | -1.58775 | 2.73949  | -1.63184 |
| H  | -2.41935 | 2.65680  | 1.32742  |
| H  | -1.72389 | 4.03230  | 0.45252  |
| H  | -3.33418 | 3.44107  | 0.02042  |
| H  | 2.02730  | 1.82232  | 0.19639  |
| H  | 4.67443  | -1.55332 | -0.10584 |
| H  | 2.78958  | -2.95426 | -0.94186 |

**1b NMR Conformer 15**

Energy: -875531.4802164

|   |          |          |          |
|---|----------|----------|----------|
| O | -1.76959 | 2.71659  | -1.15485 |
| C | -2.27598 | 1.53861  | -0.73249 |
| C | -1.59814 | 0.61677  | 0.08762  |
| C | -0.23290 | 0.83491  | 0.59140  |
| N | 0.38652  | 0.10524  | 1.43348  |
| C | 1.75601  | 0.63785  | 1.51749  |
| C | 2.73498  | -0.33194 | 0.83306  |



|    |          |          |          |   |          |          |          |
|----|----------|----------|----------|---|----------|----------|----------|
| O  | 2.94527  | -1.47346 | 1.64379  | C | 2.89633  | -1.98767 | -0.14598 |
| C  | 2.27974  | -0.76804 | -0.56647 | H | -0.24411 | -2.18863 | 0.21351  |
| C  | 3.33192  | -1.61673 | -1.23243 | H | -2.10220 | 2.35623  | 1.42034  |
| O  | 4.49984  | -0.97103 | -1.34445 | H | -3.84077 | 1.14462  | -0.01654 |
| O  | 3.16650  | -2.75018 | -1.62700 | H | -2.08639 | 3.15303  | -0.95223 |
| C  | 1.63361  | 2.04809  | 0.90498  | H | -1.36975 | 0.84359  | -1.80688 |
| C  | 2.77559  | 2.60851  | 0.08648  | H | -3.06299 | 0.85713  | -2.37668 |
| O  | 0.43993  | 1.90867  | 0.08259  | H | -3.73479 | -2.32697 | -1.27661 |
| C  | -2.23962 | -0.57532 | 0.46238  | H | -1.68085 | 0.58681  | 2.83210  |
| C  | -3.52359 | -0.83852 | 0.03031  | H | -3.48481 | -1.01555 | 0.92496  |
| Cl | -4.30940 | -2.32732 | 0.50231  | H | -3.05165 | -1.44311 | 2.58912  |
| C  | -4.20568 | 0.07006  | -0.78367 | H | -4.02386 | 0.00038  | 2.27194  |
| C  | -3.58049 | 1.24657  | -1.15697 | H | 2.12775  | 1.77919  | 0.29703  |
| H  | -0.86208 | 2.84497  | -0.82771 | H | 4.92922  | -1.38492 | -0.51638 |
| H  | 2.06827  | 0.70531  | 2.56440  | H | 3.08684  | -3.04857 | -0.27680 |
| H  | 3.71275  | 0.15686  | 0.76415  |   |          |          |          |
| H  | 2.08877  | -1.91219 | 1.79540  |   |          |          |          |
| H  | 2.08264  | 0.10111  | -1.20459 |   |          |          |          |
| H  | 1.36345  | -1.35902 | -0.49804 |   |          |          |          |
| H  | 5.15240  | -1.56098 | -1.77677 |   |          |          |          |
| H  | 1.36708  | 2.75290  | 1.70219  |   |          |          |          |
| H  | 3.04345  | 1.96473  | -0.75397 |   |          |          |          |
| H  | 2.50510  | 3.59231  | -0.30365 |   |          |          |          |
| H  | 3.65407  | 2.72831  | 0.72693  |   |          |          |          |
| H  | -1.70608 | -1.27923 | 1.09384  |   |          |          |          |
| H  | -5.21580 | -0.14721 | -1.11898 |   |          |          |          |
| H  | -4.08805 | 1.97024  | -1.78775 |   |          |          |          |

**1b** NMR Conformer 14

Energy: -875524.3062771

|    |          |          |          |
|----|----------|----------|----------|
| O  | 0.65697  | -2.55447 | 0.25932  |
| C  | 1.58690  | -1.58205 | 0.15201  |
| C  | 1.31928  | -0.21279 | 0.32840  |
| C  | -0.01901 | 0.28958  | 0.69289  |
| N  | -0.49279 | 1.43656  | 0.40064  |
| C  | -1.89036 | 1.43407  | 0.86897  |
| C  | -2.84112 | 1.45278  | -0.34638 |
| O  | -2.97580 | 2.78762  | -0.79851 |
| C  | -2.40030 | 0.59051  | -1.54958 |
| C  | -2.48144 | -0.89715 | -1.34769 |
| O  | -3.73400 | -1.35591 | -1.42410 |
| O  | -1.53240 | -1.62286 | -1.11100 |
| C  | -1.94372 | 0.23023  | 1.82871  |
| C  | -3.19791 | -0.61142 | 1.89684  |
| O  | -0.80859 | -0.56403 | 1.39389  |
| C  | 2.35087  | 0.72467  | 0.16681  |
| C  | 3.63293  | 0.29801  | -0.13466 |
| Cl | 4.91469  | 1.47628  | -0.31964 |
| C  | 3.91900  | -1.06021 | -0.28605 |

**1b** NMR Conformer 13

Energy: -875531.5614789

|    |          |          |          |
|----|----------|----------|----------|
| O  | -0.72983 | 2.79207  | 0.06184  |
| C  | -1.60798 | 1.77688  | 0.03626  |
| C  | -1.26047 | 0.48228  | -0.39690 |
| C  | 0.10946  | 0.21315  | -0.82107 |
| N  | 1.03113  | 1.10604  | -0.89793 |
| C  | 2.27610  | 0.40874  | -1.24404 |
| C  | 3.29748  | 0.48826  | -0.08090 |
| O  | 4.08608  | 1.65885  | -0.22542 |
| C  | 2.68804  | 0.50880  | 1.33547  |
| C  | 1.96957  | -0.74388 | 1.76472  |
| O  | 2.81958  | -1.74076 | 2.05180  |
| O  | 0.76773  | -0.86352 | 1.85721  |
| C  | 1.76317  | -0.97461 | -1.71896 |
| C  | 2.54603  | -2.21689 | -1.36831 |
| O  | 0.42847  | -1.05018 | -1.14821 |
| C  | -2.21590 | -0.54050 | -0.40312 |
| C  | -3.50347 | -0.26889 | 0.01851  |
| Cl | -4.70356 | -1.54242 | 0.00532  |
| C  | -3.86311 | 1.00836  | 0.45511  |
| C  | -2.91847 | 2.02232  | 0.46379  |
| H  | 0.14279  | 2.46340  | -0.27995 |
| H  | 2.76205  | 0.91524  | -2.08366 |
| H  | 4.00215  | -0.34564 | -0.16925 |
| H  | 3.50374  | 2.43909  | -0.22811 |
| H  | 1.98321  | 1.33960  | 1.41308  |
| H  | 3.51950  | 0.67403  | 2.02600  |
| H  | 2.30676  | -2.52659 | 2.33692  |
| H  | 1.61722  | -0.92680 | -2.80478 |
| H  | 2.67983  | -2.32927 | -0.29114 |
| H  | 2.02668  | -3.09860 | -1.75008 |
| H  | 3.53211  | -2.17250 | -1.83988 |

|   |          |          |          |
|---|----------|----------|----------|
| H | -1.93560 | -1.53459 | -0.73813 |
| H | -4.87965 | 1.20339  | 0.78405  |
| H | -3.17731 | 3.02214  | 0.79882  |

**1b NMR Conformer 12**

Energy: -875536.1029845

|    |          |          |          |
|----|----------|----------|----------|
| O  | -1.30696 | 2.63310  | -0.05248 |
| C  | -2.26406 | 1.69227  | -0.02531 |
| C  | -1.98650 | 0.31749  | -0.17247 |
| C  | -0.60698 | -0.11966 | -0.38083 |
| N  | 0.40855  | 0.66414  | -0.41518 |
| C  | 1.56826  | -0.17168 | -0.76039 |
| C  | 2.83700  | 0.35863  | -0.08971 |
| O  | 2.74368  | 0.38747  | 1.32070  |
| C  | 4.06184  | -0.46353 | -0.45047 |
| C  | 5.34316  | 0.23616  | -0.06305 |
| O  | 6.34742  | -0.62988 | 0.11354  |
| O  | 5.48050  | 1.43416  | 0.04303  |
| C  | 1.07096  | -1.60358 | -0.44792 |
| C  | 1.32958  | -2.17696 | 0.93535  |
| O  | -0.37805 | -1.43240 | -0.56974 |
| C  | -3.02668 | -0.62041 | -0.12542 |
| C  | -4.32574 | -0.18665 | 0.06285  |
| Cl | -5.62732 | -1.35388 | 0.12215  |
| C  | -4.61596 | 1.17236  | 0.20724  |
| C  | -3.58986 | 2.10273  | 0.16254  |
| H  | -0.42817 | 2.19206  | -0.18666 |
| H  | 1.72512  | -0.08229 | -1.84665 |
| H  | 2.98315  | 1.37818  | -0.47476 |
| H  | 2.05227  | 1.02272  | 1.57358  |
| H  | 4.10408  | -0.62506 | -1.53546 |
| H  | 4.04265  | -1.44891 | 0.02268  |
| H  | 7.16599  | -0.13184 | 0.32057  |
| H  | 1.36646  | -2.30831 | -1.22865 |
| H  | 0.97153  | -1.49615 | 1.71044  |
| H  | 0.80395  | -3.13124 | 1.02172  |
| H  | 2.39405  | -2.34682 | 1.10592  |
| H  | -2.80201 | -1.67679 | -0.23788 |
| H  | -5.64248 | 1.49554  | 0.35506  |
| H  | -3.79468 | 3.16319  | 0.27487  |

**1b NMR Conformer 11**

Energy: -875530.9938087

|   |          |         |          |
|---|----------|---------|----------|
| O | -0.67131 | 2.80958 | -0.13129 |
| C | -1.54892 | 1.79333 | -0.11117 |
| C | -1.19012 | 0.47344 | -0.45033 |
| C | 0.19342  | 0.18197 | -0.81399 |
| N | 1.11765  | 1.06818 | -0.92076 |
| C | 2.37046  | 0.34091 | -1.17668 |

|    |          |          |          |
|----|----------|----------|----------|
| C  | 3.31637  | 0.41959  | 0.04737  |
| O  | 4.15074  | 1.56002  | -0.07017 |
| C  | 2.62831  | 0.48551  | 1.42453  |
| C  | 1.85397  | -0.74650 | 1.82279  |
| O  | 0.55019  | -0.51219 | 1.99523  |
| O  | 2.33989  | -1.85596 | 1.90958  |
| C  | 1.85646  | -1.03979 | -1.64189 |
| C  | 2.64917  | -2.28403 | -1.32024 |
| O  | 0.53204  | -1.10212 | -1.04192 |
| C  | -2.14406 | -0.55105 | -0.40786 |
| C  | -3.44132 | -0.25556 | -0.03193 |
| Cl | -4.63628 | -1.53288 | 0.02456  |
| C  | -3.81401 | 1.04838  | 0.30628  |
| C  | -2.87116 | 2.06415  | 0.26609  |
| H  | 0.21228  | 2.46159  | -0.41741 |
| H  | 2.91465  | 0.81660  | -1.99834 |
| H  | 3.99573  | -0.43934 | 0.01931  |
| H  | 3.59446  | 2.35479  | -0.14892 |
| H  | 1.98047  | 1.36365  | 1.46816  |
| H  | 3.42978  | 0.59864  | 2.16023  |
| H  | 0.09827  | -1.35559 | 2.21049  |
| H  | 1.68226  | -0.98168 | -2.72348 |
| H  | 2.78601  | -2.41488 | -0.24626 |
| H  | 2.13656  | -3.16129 | -1.72103 |
| H  | 3.63067  | -2.21888 | -1.79976 |
| H  | -1.85468 | -1.56458 | -0.66819 |
| H  | -4.83796 | 1.26220  | 0.59823  |
| H  | -3.13911 | 3.08383  | 0.52545  |

**1b NMR Conformer 10**

Energy: -875527.0749117

|    |          |          |          |
|----|----------|----------|----------|
| O  | 1.96988  | 2.71349  | -0.15979 |
| C  | 2.63889  | 1.53884  | -0.14225 |
| C  | 1.89803  | 0.34546  | -0.15615 |
| C  | 0.42380  | 0.33836  | -0.22744 |
| N  | -0.33752 | -0.44232 | 0.43531  |
| C  | -1.69849 | -0.18889 | -0.07119 |
| C  | -2.72852 | -0.38716 | 1.04000  |
| O  | -2.49611 | 0.45510  | 2.15376  |
| C  | -4.16055 | -0.13053 | 0.58712  |
| C  | -4.68241 | -1.17018 | -0.37208 |
| O  | -5.86653 | -0.81776 | -0.88376 |
| O  | -4.12915 | -2.21293 | -0.64884 |
| C  | -1.57388 | 1.18779  | -0.76436 |
| C  | -1.83428 | 2.44027  | 0.05825  |
| O  | -0.15695 | 1.19006  | -1.10468 |
| C  | 2.56095  | -0.88252 | -0.07644 |
| C  | 3.94524  | -0.91876 | -0.00586 |
| Cl | 4.76430  | -2.46126 | 0.08201  |

|   |          |          |          |
|---|----------|----------|----------|
| C | 4.69056  | 0.25728  | -0.00822 |
| C | 4.03442  | 1.48027  | -0.07218 |
| H | 2.59322  | 3.46107  | -0.10704 |
| H | -1.91022 | -0.95124 | -0.83513 |
| H | -2.64880 | -1.44032 | 1.34533  |
| H | -1.59198 | 0.28965  | 2.47191  |
| H | -4.28291 | 0.85693  | 0.13101  |
| H | -4.81582 | -0.14464 | 1.46646  |
| H | -6.18254 | -1.53079 | -1.47823 |
| H | -2.12434 | 1.21488  | -1.70815 |
| H | -1.21409 | 2.44665  | 0.95702  |
| H | -1.58594 | 3.31457  | -0.54871 |
| H | -2.87860 | 2.50990  | 0.36830  |
| H | 1.97885  | -1.79939 | -0.07870 |
| H | 5.77476  | 0.21995  | 0.04447  |
| H | 4.60616  | 2.40551  | -0.05854 |

**1b NMR Conformer 9**

Energy: -875533.0536399

|    |          |          |          |
|----|----------|----------|----------|
| O  | 0.35946  | -2.26052 | -0.77817 |
| C  | 1.41494  | -1.48294 | -0.50861 |
| C  | 1.32961  | -0.08474 | -0.37908 |
| C  | 0.04319  | 0.58392  | -0.53073 |
| N  | -1.06847 | 0.00048  | -0.80397 |
| C  | -2.07635 | 1.06110  | -0.93027 |
| C  | -3.45961 | 0.66405  | -0.38481 |
| O  | -4.17496 | -0.09209 | -1.34811 |
| C  | -3.46055 | -0.04097 | 0.98246  |
| C  | -2.67153 | -1.32388 | 1.00774  |
| O  | -1.78333 | -1.37319 | 1.99880  |
| O  | -2.87381 | -2.26835 | 0.27400  |
| C  | -1.36291 | 2.30653  | -0.33372 |
| C  | -1.67489 | 2.70104  | 1.09610  |
| O  | 0.04318  | 1.92116  | -0.38414 |
| C  | 2.47506  | 0.66583  | -0.09873 |
| C  | 3.68679  | 0.02534  | 0.05365  |
| Cl | 5.12189  | 0.96397  | 0.40392  |
| C  | 3.78607  | -1.36027 | -0.06688 |
| C  | 2.65532  | -2.10526 | -0.34725 |
| H  | -0.43201 | -1.67993 | -0.91187 |
| H  | -2.24470 | 1.23289  | -2.00168 |
| H  | -4.03941 | 1.58746  | -0.26541 |
| H  | -3.76230 | -0.96967 | -1.44297 |
| H  | -4.50012 | -0.30754 | 1.20280  |
| H  | -3.10574 | 0.61678  | 1.77543  |
| H  | -1.33250 | -2.24811 | 1.97900  |
| H  | -1.47351 | 3.16334  | -1.00152 |
| H  | -1.39087 | 1.90613  | 1.79072  |
| H  | -1.10211 | 3.59562  | 1.35222  |

|   |          |          |          |
|---|----------|----------|----------|
| H | -2.73967 | 2.92727  | 1.21603  |
| H | 2.39714  | 1.74539  | 0.00005  |
| H | 4.74844  | -1.84964 | 0.05752  |
| H | 2.70948  | -3.18551 | -0.44751 |

**1b NMR Conformer 8**

Energy: -875535.9737803

|    |          |          |          |
|----|----------|----------|----------|
| O  | 0.99435  | -2.29555 | -1.45234 |
| C  | 1.86350  | -1.49596 | -0.81478 |
| C  | 1.57255  | -0.15265 | -0.49769 |
| C  | 0.27205  | 0.40518  | -0.86300 |
| N  | -0.63732 | -0.22794 | -1.51307 |
| C  | -1.82960 | 0.63427  | -1.52235 |
| C  | -2.90644 | 0.05754  | -0.58658 |
| O  | -3.53731 | -1.06123 | -1.18121 |
| C  | -2.36447 | -0.32550 | 0.79729  |
| C  | -3.47863 | -0.78487 | 1.70219  |
| O  | -4.42123 | 0.15405  | 1.85393  |
| O  | -3.53500 | -1.86758 | 2.24237  |
| C  | -1.24981 | 2.01581  | -1.14806 |
| C  | -2.06953 | 2.95762  | -0.29361 |
| O  | -0.01255 | 1.66038  | -0.46424 |
| C  | 2.51933  | 0.63536  | 0.17161  |
| C  | 3.73901  | 0.08499  | 0.51764  |
| Cl | 4.92486  | 1.06430  | 1.35098  |
| C  | 4.04064  | -1.24474 | 0.21111  |
| C  | 3.10767  | -2.02697 | -0.45050 |
| H  | 0.16684  | -1.78191 | -1.64142 |
| H  | -2.26842 | 0.66387  | -2.52447 |
| H  | -3.69846 | 0.80585  | -0.47569 |
| H  | -2.86926 | -1.74902 | -1.35431 |
| H  | -1.86137 | 0.52560  | 1.27097  |
| H  | -1.64574 | -1.14368 | 0.70821  |
| H  | -5.12410 | -0.18867 | 2.44529  |
| H  | -0.94548 | 2.52390  | -2.07146 |
| H  | -2.35477 | 2.51473  | 0.66314  |
| H  | -1.49794 | 3.86718  | -0.09635 |
| H  | -2.97903 | 3.23864  | -0.83231 |
| H  | 2.28580  | 1.66875  | 0.40963  |
| H  | 5.00389  | -1.66116 | 0.49200  |
| H  | 3.32307  | -3.06257 | -0.69615 |

**1b NMR Conformer 7**

Energy: -875537.6477371

|   |          |          |          |
|---|----------|----------|----------|
| O | 0.67220  | -2.35646 | 0.57768  |
| C | 1.76218  | -1.60808 | 0.34479  |
| C | 1.68891  | -0.24525 | -0.01146 |
| C | 0.37990  | 0.39258  | -0.14549 |
| N | -0.73926 | -0.19779 | 0.06768  |

|    |          |          |          |
|----|----------|----------|----------|
| C  | -1.79554 | 0.76406  | -0.27064 |
| C  | -2.95891 | 0.71571  | 0.72250  |
| O  | -3.93127 | 1.68662  | 0.37968  |
| C  | -3.55884 | -0.68527 | 0.85345  |
| C  | -4.18642 | -1.19513 | -0.41872 |
| O  | -4.38414 | -2.51248 | -0.39742 |
| O  | -4.50825 | -0.49601 | -1.36094 |
| C  | -1.04241 | 2.11675  | -0.33798 |
| C  | -1.08901 | 2.97935  | 0.90923  |
| O  | 0.33920  | 1.68081  | -0.53023 |
| C  | 2.86125  | 0.48737  | -0.24003 |
| C  | 4.08878  | -0.13655 | -0.11477 |
| Cl | 5.55461  | 0.77536  | -0.39785 |
| C  | 4.17687  | -1.48602 | 0.23644  |
| C  | 3.01946  | -2.21398 | 0.46393  |
| H  | -0.13475 | -1.79251 | 0.44974  |
| H  | -2.18360 | 0.50818  | -1.26672 |
| H  | -2.58714 | 0.99733  | 1.71336  |
| H  | -4.34173 | 1.41781  | -0.45966 |
| H  | -4.35185 | -0.66551 | 1.61119  |
| H  | -2.80549 | -1.40110 | 1.19272  |
| H  | -4.83054 | -2.78532 | -1.22752 |
| H  | -1.31530 | 2.68987  | -1.22558 |
| H  | -0.74121 | 2.41887  | 1.78293  |
| H  | -0.44105 | 3.84851  | 0.77624  |
| H  | -2.11080 | 3.32182  | 1.08937  |
| H  | 2.79388  | 1.53627  | -0.51258 |
| H  | 5.14957  | -1.96036 | 0.33043  |
| H  | 3.06702  | -3.26361 | 0.73794  |

**1b NMR Conformer 6**

Energy: -875531.8549964

|   |          |          |          |
|---|----------|----------|----------|
| O | 1.74742  | 2.68882  | 1.21888  |
| C | 2.25558  | 1.52397  | 0.76301  |
| C | 1.57833  | 0.62638  | -0.08411 |
| C | 0.21413  | 0.86101  | -0.58286 |
| N | -0.39707 | 0.16917  | -1.46173 |
| C | -1.77007 | 0.69671  | -1.52730 |
| C | -2.73906 | -0.32025 | -0.90199 |
| O | -2.91339 | -1.42315 | -1.77516 |
| C | -2.29287 | -0.81255 | 0.47365  |
| C | -3.40572 | -1.53327 | 1.19531  |
| O | -2.93618 | -2.40239 | 2.09743  |
| O | -4.58909 | -1.34263 | 1.01854  |
| C | -1.66265 | 2.07269  | -0.83853 |
| C | -2.81188 | 2.56875  | 0.01078  |
| O | -0.46791 | 1.90390  | -0.02358 |
| C | 2.21969  | -0.55392 | -0.49343 |
| C | 3.50388  | -0.82926 | -0.06903 |

|    |          |          |          |
|----|----------|----------|----------|
| Cl | 4.28934  | -2.30425 | -0.58211 |
| C  | 4.18574  | 0.05585  | 0.77055  |
| C  | 3.56026  | 1.22089  | 1.17832  |
| H  | 0.83740  | 2.82142  | 0.90038  |
| H  | -2.07486 | 0.81760  | -2.57143 |
| H  | -3.72878 | 0.14114  | -0.81940 |
| H  | -2.04238 | -1.82308 | -1.94671 |
| H  | -1.97333 | 0.01256  | 1.12390  |
| H  | -1.43189 | -1.48169 | 0.37983  |
| H  | -3.69161 | -2.81439 | 2.56703  |
| H  | -1.40600 | 2.82481  | -1.59462 |
| H  | -3.06884 | 1.87175  | 0.81164  |
| H  | -2.55557 | 3.53131  | 0.45911  |
| H  | -3.69300 | 2.71285  | -0.62081 |
| H  | 1.68661  | -1.23949 | -1.14516 |
| H  | 5.19590  | -0.17087 | 1.09933  |
| H  | 4.06801  | 1.92585  | 1.82974  |

**1b NMR Conformer 5**

Energy: -875532.1193787

|    |          |          |          |
|----|----------|----------|----------|
| O  | 0.30974  | -2.26000 | -0.85247 |
| C  | 1.35812  | -1.46937 | -0.56576 |
| C  | 1.24716  | -0.06605 | -0.45924 |
| C  | -0.05606 | 0.56376  | -0.66585 |
| N  | -1.11692 | -0.07345 | -0.99482 |
| C  | -2.21020 | 0.90007  | -1.06588 |
| C  | -3.47990 | 0.32715  | -0.40809 |
| O  | -3.93866 | -0.74980 | -1.20443 |
| C  | -3.38787 | -0.09843 | 1.07419  |
| C  | -2.21403 | -0.98399 | 1.42008  |
| O  | -2.31091 | -2.20114 | 0.86461  |
| O  | -1.28835 | -0.65806 | 2.13444  |
| C  | -1.57482 | 2.22464  | -0.54883 |
| C  | -1.98678 | 2.76634  | 0.80683  |
| O  | -0.15707 | 1.88905  | -0.47567 |
| C  | 2.37104  | 0.70822  | -0.14230 |
| C  | 3.59023  | 0.08615  | 0.05816  |
| Cl | 4.99708  | 1.05068  | 0.44827  |
| C  | 3.71732  | -1.30167 | -0.04762 |
| C  | 2.60599  | -2.07218 | -0.35673 |
| H  | -0.48655 | -1.68659 | -1.00502 |
| H  | -2.47991 | 1.02667  | -2.12130 |
| H  | -4.26529 | 1.08955  | -0.46870 |
| H  | -3.24559 | -1.43143 | -1.23611 |
| H  | -4.30634 | -0.65496 | 1.28365  |
| H  | -3.35353 | 0.76756  | 1.73240  |
| H  | -1.51651 | -2.72414 | 1.10402  |
| H  | -1.66799 | 2.99995  | -1.31272 |
| H  | -1.70716 | 2.07157  | 1.60208  |

|   |          |          |          |
|---|----------|----------|----------|
| H | -1.47616 | 3.71543  | 0.98432  |
| H | -3.06519 | 2.94880  | 0.83910  |
| H | 2.27358  | 1.78607  | -0.05738 |
| H | 4.68266  | -1.77241 | 0.11384  |
| H | 2.68266  | -3.15188 | -0.44055 |

**1b NMR Conformer 4**

Energy: -875536.3348995

|    |          |          |          |
|----|----------|----------|----------|
| O  | 0.99527  | -2.22236 | -1.58625 |
| C  | 1.85511  | -1.44777 | -0.90640 |
| C  | 1.55196  | -0.12283 | -0.52957 |
| C  | 0.24753  | 0.43812  | -0.87411 |
| N  | -0.65259 | -0.17713 | -1.55294 |
| C  | -1.85441 | 0.67221  | -1.53168 |
| C  | -2.92314 | 0.03647  | -0.62788 |
| O  | -3.52424 | -1.06892 | -1.28008 |
| C  | -2.38285 | -0.39240 | 0.73534  |
| C  | -3.49757 | -0.68575 | 1.71040  |
| O  | -3.10700 | -1.52091 | 2.67907  |
| O  | -4.61002 | -0.20810 | 1.66108  |
| C  | -1.29269 | 2.04126  | -1.09082 |
| C  | -2.12823 | 2.92365  | -0.18999 |
| O  | -0.05091 | 1.67235  | -0.42268 |
| C  | 2.48860  | 0.64121  | 0.18032  |
| C  | 3.71069  | 0.08466  | 0.50818  |
| Cl | 4.88423  | 1.03283  | 1.39313  |
| C  | 4.02445  | -1.22752 | 0.14307  |
| C  | 3.10121  | -1.98582 | -0.55926 |
| H  | 0.16630  | -1.70483 | -1.75889 |
| H  | -2.28646 | 0.74160  | -2.53454 |
| H  | -3.73328 | 0.75952  | -0.48614 |
| H  | -2.83132 | -1.71429 | -1.50678 |
| H  | -1.75468 | 0.38285  | 1.19409  |
| H  | -1.75097 | -1.28068 | 0.63451  |
| H  | -3.84687 | -1.64741 | 3.30993  |
| H  | -0.99510 | 2.59934  | -1.98702 |
| H  | -1.57135 | 3.82918  | 0.06042  |
| H  | -3.04045 | 3.21985  | -0.71563 |
| H  | -2.40939 | 2.42257  | 0.73919  |
| H  | 2.24545  | 1.66065  | 0.46430  |
| H  | 4.98939  | -1.64886 | 0.41019  |
| H  | 3.32615  | -3.00724 | -0.85110 |

**1b NMR Conformer 3**

Energy: -875529.5350123

|   |         |         |          |
|---|---------|---------|----------|
| O | 2.02031 | 2.86157 | -0.28372 |
| C | 2.56333 | 1.62655 | -0.23234 |
| C | 1.82998 | 0.42679 | -0.16350 |
| C | 0.35952 | 0.37870 | -0.13201 |

|    |          |          |          |
|----|----------|----------|----------|
| N  | -0.35802 | -0.65656 | 0.05785  |
| C  | -1.75205 | -0.21923 | -0.11584 |
| C  | -2.68299 | -1.04312 | 0.77491  |
| O  | -2.35398 | -0.94973 | 2.14405  |
| C  | -4.15609 | -0.63800 | 0.64746  |
| C  | -4.60879 | -0.73421 | -0.78764 |
| O  | -4.66451 | 0.46075  | -1.38808 |
| O  | -4.85891 | -1.77352 | -1.35874 |
| C  | -1.68476 | 1.31448  | 0.05661  |
| C  | -1.85729 | 1.89454  | 1.45034  |
| O  | -0.29739 | 1.55661  | -0.34033 |
| C  | 2.51526  | -0.79774 | -0.11060 |
| C  | 3.89531  | -0.82319 | -0.12233 |
| Cl | 4.73359  | -2.35621 | -0.05320 |
| C  | 4.63279  | 0.36174  | -0.19087 |
| C  | 3.96465  | 1.57243  | -0.24566 |
| H  | 1.04839  | 2.81412  | -0.28754 |
| H  | -2.03019 | -0.43854 | -1.15971 |
| H  | -2.58500 | -2.08478 | 0.43401  |
| H  | -1.44307 | -1.27183 | 2.26088  |
| H  | -4.30934 | 0.37568  | 1.02224  |
| H  | -4.75223 | -1.33266 | 1.24381  |
| H  | -4.93079 | 0.33833  | -2.32475 |
| H  | -2.31395 | 1.82896  | -0.67233 |
| H  | -1.17618 | 1.41636  | 2.15757  |
| H  | -1.64588 | 2.96640  | 1.41425  |
| H  | -2.87504 | 1.75318  | 1.81758  |
| H  | 1.93928  | -1.71678 | -0.06151 |
| H  | 5.71847  | 0.33113  | -0.20250 |
| H  | 4.51323  | 2.50803  | -0.29929 |

**1b NMR Conformer 2**

Energy: -875530.6456162

|   |          |          |          |
|---|----------|----------|----------|
| O | 2.15605  | 2.83575  | -0.45389 |
| C | 2.66328  | 1.59111  | -0.32591 |
| C | 1.89448  | 0.41818  | -0.20524 |
| C | 0.42270  | 0.41450  | -0.19357 |
| N | -0.32763 | -0.58362 | 0.05374  |
| C | -1.70810 | -0.11901 | -0.16017 |
| C | -2.66715 | -0.84500 | 0.78341  |
| O | -2.33996 | -0.64920 | 2.14610  |
| C | -4.11945 | -0.41694 | 0.61245  |
| C | -4.72657 | -0.86672 | -0.69259 |
| O | -5.93865 | -0.33523 | -0.88106 |
| O | -4.21016 | -1.62876 | -1.48161 |
| C | -1.59335 | 1.42152  | -0.09155 |
| C | -1.76488 | 2.10500  | 1.25500  |
| O | -0.19619 | 1.59613  | -0.48753 |
| C | 2.54296  | -0.82033 | -0.07340 |

|    |          |          |          |   |          |          |          |
|----|----------|----------|----------|---|----------|----------|----------|
| C  | 3.92177  | -0.88475 | -0.05850 | H | 0.87392  | -1.39453 | 2.15836  |
| Cl | 4.71509  | -2.43432 | 0.10602  | H | 0.92849  | -3.01687 | 1.42543  |
| C  | 4.69430  | 0.27357  | -0.17681 | H | 2.42839  | -2.12909 | 1.76338  |
| C  | 4.06246  | 1.49764  | -0.30966 | H | -2.54601 | -1.71134 | -0.31823 |
| H  | 1.18347  | 2.81379  | -0.47771 | H | -5.61101 | 1.29546  | -0.08852 |
| H  | -1.99494 | -0.40592 | -1.18215 | H | -3.86456 | 3.05768  | 0.12580  |
| H  | -2.59168 | -1.91172 | 0.52932  |   |          |          |          |
| H  | -1.43446 | -0.97434 | 2.28951  |   |          |          |          |
| H  | -4.25011 | 0.66624  | 0.70231  |   |          |          |          |
| H  | -4.71452 | -0.86405 | 1.41776  |   |          |          |          |
| H  | -6.30735 | -0.67227 | -1.72504 |   |          |          |          |
| H  | -2.19597 | 1.90644  | -0.86310 |   |          |          |          |
| H  | -1.09535 | 1.66923  | 1.99950  |   |          |          |          |
| H  | -1.53639 | 3.16810  | 1.14274  |   |          |          |          |
| H  | -2.78638 | 2.00469  | 1.62605  |   |          |          |          |
| H  | 1.93994  | -1.71886 | 0.01502  |   |          |          |          |
| H  | 5.77867  | 0.21200  | -0.16637 |   |          |          |          |
| H  | 4.63857  | 2.41336  | -0.40321 |   |          |          |          |

**1b NMR Conformer 1**

Energy: -875535.0092543

|    |          |          |          |
|----|----------|----------|----------|
| O  | -1.32989 | 2.66524  | 0.14670  |
| C  | -2.22849 | 1.67525  | 0.02483  |
| C  | -1.85813 | 0.32002  | -0.10264 |
| C  | -0.44120 | -0.03975 | -0.11715 |
| N  | 0.52410  | 0.79531  | 0.01177  |
| C  | 1.76480  | 0.02840  | -0.17596 |
| C  | 2.88836  | 0.60410  | 0.68731  |
| O  | 2.57389  | 0.59508  | 2.06632  |
| C  | 4.20780  | -0.14128 | 0.52904  |
| C  | 4.85018  | 0.06125  | -0.82028 |
| O  | 5.92718  | -0.71515 | -0.97359 |
| O  | 4.46799  | 0.83542  | -1.67136 |
| C  | 1.30516  | -1.43499 | 0.03818  |
| C  | 1.39238  | -2.02739 | 1.43520  |
| O  | -0.11683 | -1.33507 | -0.29167 |
| C  | -2.84170 | -0.67096 | -0.22174 |
| C  | -4.17624 | -0.30939 | -0.21549 |
| Cl | -5.40677 | -1.54318 | -0.36615 |
| C  | -4.55785 | 1.02906  | -0.09136 |
| C  | -3.58801 | 2.01219  | 0.02793  |
| H  | -0.41827 | 2.27471  | 0.12133  |
| H  | 2.07416  | 0.15524  | -1.22311 |
| H  | 3.03634  | 1.63728  | 0.34226  |
| H  | 1.76971  | 1.12565  | 2.20007  |
| H  | 4.10608  | -1.21666 | 0.70684  |
| H  | 4.91247  | 0.22806  | 1.28352  |
| H  | 6.32751  | -0.53683 | -1.85084 |
| H  | 1.74781  | -2.10494 | -0.70264 |

**1a NMR Conformer 28**

Energy: -875532.9115592

|    |          |          |          |
|----|----------|----------|----------|
| O  | 1.17358  | 1.50477  | 2.30294  |
| C  | 1.99484  | 0.79476  | 1.49960  |
| C  | 1.54367  | 0.40433  | 0.22725  |
| C  | 0.20918  | 0.74557  | -0.30507 |
| N  | -0.40787 | 0.05502  | -1.18708 |
| C  | -1.69581 | 0.71892  | -1.40916 |
| C  | -2.82491 | -0.18375 | -0.89963 |
| O  | -2.85581 | -1.38737 | -1.66596 |
| C  | -2.69802 | -0.51487 | 0.59324  |
| C  | -3.85632 | -1.32975 | 1.14105  |
| O  | -4.35146 | -2.28186 | 0.34691  |
| O  | -4.31184 | -1.16498 | 2.25186  |
| C  | -1.56496 | 2.07079  | -0.67758 |
| C  | -1.32550 | 3.24258  | -1.60881 |
| O  | -0.38508 | 1.87234  | 0.14441  |
| C  | 2.37720  | -0.36966 | -0.59012 |
| C  | 3.63931  | -0.73228 | -0.15402 |
| Cl | 4.67166  | -1.68504 | -1.19508 |
| C  | 4.10035  | -0.34273 | 1.10215  |
| C  | 3.27508  | 0.41377  | 1.92106  |
| H  | 1.60240  | 1.67495  | 3.16131  |
| H  | -1.85982 | 0.86282  | -2.48424 |
| H  | -3.78257 | 0.31567  | -1.09276 |
| H  | -1.94918 | -1.74811 | -1.71347 |
| H  | -2.62338 | 0.38890  | 1.20292  |
| H  | -1.78075 | -1.09892 | 0.74925  |
| H  | -3.89303 | -2.26809 | -0.52358 |
| H  | -2.39892 | 2.27377  | 0.00255  |
| H  | -2.21574 | 3.41621  | -2.22044 |
| H  | -1.10876 | 4.14905  | -1.03973 |
| H  | -0.48217 | 3.02950  | -2.27322 |
| H  | 2.01874  | -0.67072 | -1.56954 |
| H  | 5.09265  | -0.62947 | 1.43756  |
| H  | 3.61764  | 0.71567  | 2.90828  |

**1a NMR Conformer 27**

Energy: -875539.1679980

|   |          |          |         |
|---|----------|----------|---------|
| O | -0.91774 | -1.32992 | 2.34509 |
| C | -1.80496 | -0.97180 | 1.40332 |
| C | -1.53444 | 0.01868  | 0.43629 |

|    |          |          |          |
|----|----------|----------|----------|
| C  | -0.23479 | 0.68796  | 0.43496  |
| N  | 0.70274  | 0.46384  | 1.28294  |
| C  | 1.86051  | 1.26038  | 0.86416  |
| C  | 2.98286  | 0.34267  | 0.35862  |
| O  | 3.49170  | -0.44876 | 1.41488  |
| C  | 2.53940  | -0.54565 | -0.81024 |
| C  | 3.66373  | -1.44971 | -1.24847 |
| O  | 4.75426  | -0.76175 | -1.60586 |
| O  | 3.60784  | -2.65967 | -1.28365 |
| C  | 1.28144  | 2.21439  | -0.20437 |
| C  | 1.02471  | 3.61808  | 0.30517  |
| O  | 0.00731  | 1.59188  | -0.53246 |
| C  | -2.50268 | 0.35250  | -0.52080 |
| C  | -3.72272 | -0.29736 | -0.50992 |
| Cl | -4.93332 | 0.11812  | -1.70137 |
| C  | -4.00375 | -1.28215 | 0.44098  |
| C  | -3.04951 | -1.61457 | 1.38952  |
| H  | -0.09538 | -0.78789 | 2.23376  |
| H  | 2.25818  | 1.81753  | 1.72049  |
| H  | 3.81520  | 0.97708  | 0.03315  |
| H  | 2.76607  | -0.98165 | 1.78740  |
| H  | 2.23950  | 0.06793  | -1.66849 |
| H  | 1.69751  | -1.17890 | -0.51792 |
| H  | 5.45570  | -1.39127 | -1.87515 |
| H  | 1.87112  | 2.22928  | -1.12675 |
| H  | 1.97640  | 4.10708  | 0.53214  |
| H  | 0.49689  | 4.20924  | -0.44638 |
| H  | 0.42305  | 3.58395  | 1.21906  |
| H  | -2.28568 | 1.11748  | -1.26013 |
| H  | -4.96765 | -1.78330 | 0.43522  |
| H  | -3.24948 | -2.37643 | 2.13701  |

**1a NMR Conformer 26**  
Energy: -875534.8899899

|   |          |          |          |
|---|----------|----------|----------|
| O | 1.81485  | 2.36033  | 1.68582  |
| C | 2.28125  | 1.27196  | 1.03736  |
| C | 1.56226  | 0.53261  | 0.07907  |
| C | 0.18974  | 0.86306  | -0.33729 |
| N | -0.46899 | 0.30401  | -1.27321 |
| C | -1.81410 | 0.89311  | -1.25608 |
| C | -2.83685 | -0.15999 | -0.80925 |
| O | -2.93332 | -1.18925 | -1.77613 |
| C | -2.51354 | -0.74901 | 0.56228  |
| C | -3.64138 | -1.61552 | 1.06770  |
| O | -3.20503 | -2.59655 | 1.86515  |
| O | -4.81454 | -1.44225 | 0.81849  |
| C | -1.69438 | 2.11294  | -0.31836 |
| C | -1.59471 | 3.43767  | -1.04677 |
| O | -0.43731 | 1.84955  | 0.36532  |

|    |          |          |          |
|----|----------|----------|----------|
| C  | 2.16606  | -0.58048 | -0.52823 |
| C  | 3.45325  | -0.94481 | -0.18882 |
| Cl | 4.18959  | -2.33534 | -0.95114 |
| C  | 4.17627  | -0.21738 | 0.76036  |
| C  | 3.58799  | 0.88032  | 1.36348  |
| H  | 0.89892  | 2.55950  | 1.42581  |
| H  | -2.09102 | 1.20324  | -2.27061 |
| H  | -3.82508 | 0.31268  | -0.77297 |
| H  | -2.04098 | -1.54536 | -1.93474 |
| H  | -2.36420 | 0.03936  | 1.31275  |
| H  | -1.59170 | -1.33745 | 0.52445  |
| H  | -3.97603 | -3.10210 | 2.19945  |
| H  | -2.47168 | 2.13987  | 0.45237  |
| H  | -2.54196 | 3.65015  | -1.55059 |
| H  | -1.38064 | 4.24951  | -0.34803 |
| H  | -0.80114 | 3.39548  | -1.79949 |
| H  | 1.60102  | -1.14436 | -1.26409 |
| H  | 5.18843  | -0.51246 | 1.02157  |
| H  | 4.12753  | 1.46307  | 2.10407  |

**1a NMR Conformer 24**  
Energy: -875540.9871794

|    |          |          |          |
|----|----------|----------|----------|
| O  | -1.37033 | -2.54378 | 0.95963  |
| C  | -2.25452 | -1.64016 | 0.50702  |
| C  | -1.90591 | -0.29965 | 0.23974  |
| C  | -0.52812 | 0.14211  | 0.45525  |
| N  | 0.41700  | -0.61600 | 0.87749  |
| C  | 1.63441  | 0.19392  | 0.94639  |
| C  | 2.72329  | -0.43212 | 0.06788  |
| O  | 2.31942  | -0.46702 | -1.28915 |
| C  | 4.01545  | 0.36446  | 0.12343  |
| C  | 5.14797  | -0.36793 | -0.55677 |
| O  | 6.05994  | 0.47132  | -1.05754 |
| O  | 5.25091  | -1.57280 | -0.62498 |
| C  | 1.18287  | 1.60100  | 0.47854  |
| C  | 1.35957  | 2.69419  | 1.51000  |
| O  | -0.23440 | 1.42690  | 0.19997  |
| C  | -2.87257 | 0.59990  | -0.22877 |
| C  | -4.16955 | 0.16327  | -0.42690 |
| Cl | -5.37943 | 1.28395  | -1.00881 |
| C  | -4.52890 | -1.16184 | -0.16762 |
| C  | -3.57559 | -2.05485 | 0.29608  |
| H  | -0.48768 | -2.10147 | 1.06557  |
| H  | 1.99558  | 0.21401  | 1.98466  |
| H  | 2.91245  | -1.44916 | 0.43594  |
| H  | 1.63401  | -1.14838 | -1.39769 |
| H  | 4.31944  | 0.52621  | 1.16609  |
| H  | 3.89437  | 1.34699  | -0.34344 |
| H  | 6.79228  | -0.05043 | -1.44943 |

|   |          |          |          |
|---|----------|----------|----------|
| H | 1.64545  | 1.86904  | -0.47715 |
| H | 2.42560  | 2.83385  | 1.71601  |
| H | 0.94973  | 3.64073  | 1.15029  |
| H | 0.85859  | 2.41961  | 2.44321  |
| H | -2.59464 | 1.62985  | -0.43142 |
| H | -5.55238 | -1.48861 | -0.32865 |
| H | -3.83612 | -3.08825 | 0.50433  |

**1a NMR Conformer 23**

Energy: -875537.8587497

|    |          |          |          |
|----|----------|----------|----------|
| O  | 0.36522  | -1.98446 | -1.44924 |
| C  | 1.39031  | -1.29308 | -0.93037 |
| C  | 1.24686  | -0.00605 | -0.37161 |
| C  | -0.06851 | 0.63088  | -0.35184 |
| N  | -1.15152 | 0.08314  | -0.77103 |
| C  | -2.23166 | 1.06059  | -0.59584 |
| C  | -3.44474 | 0.46912  | 0.13758  |
| O  | -4.27377 | -0.25689 | -0.74328 |
| C  | -3.06163 | -0.36112 | 1.37500  |
| C  | -2.36143 | -1.65604 | 1.04106  |
| O  | -1.19676 | -1.79795 | 1.67874  |
| O  | -2.80259 | -2.50184 | 0.28982  |
| C  | -1.55671 | 2.24287  | 0.13836  |
| C  | -1.73448 | 3.58645  | -0.52909 |
| O  | -0.14572 | 1.88024  | 0.13757  |
| C  | 2.36034  | 0.65940  | 0.15850  |
| C  | 3.59747  | 0.04693  | 0.12567  |
| Cl | 4.99058  | 0.87594  | 0.78745  |
| C  | 3.75696  | -1.22480 | -0.42925 |
| C  | 2.65927  | -1.88630 | -0.95314 |
| H  | -0.46296 | -1.44432 | -1.37148 |
| H  | -2.58770 | 1.37525  | -1.58705 |
| H  | -4.05374 | 1.31467  | 0.48356  |
| H  | -3.84101 | -1.09999 | -0.96315 |
| H  | -3.98385 | -0.63396 | 1.89972  |
| H  | -2.44235 | 0.21819  | 2.06363  |
| H  | -0.80266 | -2.66279 | 1.43214  |
| H  | -1.86109 | 2.29208  | 1.19141  |
| H  | -2.79773 | 3.84654  | -0.54149 |
| H  | -1.19382 | 4.36608  | 0.01182  |
| H  | -1.37229 | 3.54646  | -1.56020 |
| H  | 2.23834  | 1.64913  | 0.58837  |
| H  | 4.73843  | -1.69020 | -0.44678 |
| H  | 2.76006  | -2.87593 | -1.38890 |

**1a NMR Conformer 22**

Energy: -875536.7003924

|   |         |          |          |
|---|---------|----------|----------|
| O | 0.32419 | -2.03871 | -1.41694 |
| C | 1.34462 | -1.31598 | -0.92517 |

|    |          |          |          |
|----|----------|----------|----------|
| C  | 1.18287  | -0.00762 | -0.42611 |
| C  | -0.14014 | 0.60907  | -0.42617 |
| N  | -1.18918 | 0.05959  | -0.91980 |
| C  | -2.30875 | 0.97282  | -0.69647 |
| C  | -3.47504 | 0.24867  | -0.01011 |
| O  | -4.02375 | -0.72038 | -0.88111 |
| C  | -3.14499 | -0.34833 | 1.37281  |
| C  | -2.01185 | -1.34576 | 1.38662  |
| O  | -2.26808 | -2.41768 | 0.62285  |
| O  | -0.97743 | -1.21402 | 2.00588  |
| C  | -1.68678 | 2.15069  | 0.09174  |
| C  | -1.86440 | 3.50323  | -0.55998 |
| O  | -0.27125 | 1.82221  | 0.13616  |
| C  | 2.28171  | 0.69186  | 0.08768  |
| C  | 3.52780  | 0.09242  | 0.09418  |
| Cl | 4.90204  | 0.96347  | 0.73259  |
| C  | 3.70517  | -1.20010 | -0.40522 |
| C  | 2.61809  | -1.89713 | -0.91065 |
| H  | -0.50097 | -1.49197 | -1.37228 |
| H  | -2.68763 | 1.31327  | -1.66904 |
| H  | -4.27030 | 0.98519  | 0.15690  |
| H  | -3.33912 | -1.37436 | -1.09378 |
| H  | -4.05198 | -0.85587 | 1.71433  |
| H  | -2.89959 | 0.43583  | 2.09165  |
| H  | -1.49303 | -3.01389 | 0.63882  |
| H  | -2.02935 | 2.17547  | 1.13247  |
| H  | -2.92931 | 3.75090  | -0.60155 |
| H  | -1.35013 | 4.27993  | 0.00958  |
| H  | -1.46999 | 3.48733  | -1.57965 |
| H  | 2.14583  | 1.69627  | 0.47675  |
| H  | 4.69079  | -1.65513 | -0.39387 |
| H  | 2.73523  | -2.90362 | -1.29949 |

**1a NMR Conformer 21**

Energy: -875532.0460919

|   |          |          |          |
|---|----------|----------|----------|
| O | 1.93393  | 2.74350  | 0.33577  |
| C | 2.61295  | 1.58511  | 0.17973  |
| C | 1.89228  | 0.39905  | -0.03894 |
| C | 0.41838  | 0.35873  | -0.13574 |
| N | -0.30063 | -0.62165 | 0.25423  |
| C | -1.68790 | -0.29030 | -0.08726 |
| C | -2.56612 | -0.40093 | 1.16491  |
| O | -2.10705 | 0.47411  | 2.17926  |
| C | -4.01573 | -0.01691 | 0.90175  |
| C | -4.72903 | -0.96241 | -0.03032 |
| O | -5.88479 | -0.45086 | -0.46643 |
| O | -4.33413 | -2.06451 | -0.34608 |
| C | -1.61806 | 1.13593  | -0.68126 |
| C | -2.20486 | 1.27060  | -2.07024 |



|    |          |          |          |   |          |          |          |
|----|----------|----------|----------|---|----------|----------|----------|
| O  | -0.19456 | 1.40634  | -0.72637 | H | -2.03192 | -2.92252 | -0.26099 |
| C  | 2.58056  | -0.81384 | -0.15398 | H | -3.02432 | 1.66340  | 0.82195  |
| C  | 3.96303  | -0.84048 | -0.06893 | H | -3.96184 | 2.70905  | -1.25208 |
| Cl | 4.80816  | -2.36313 | -0.22761 | H | -2.80102 | 3.78792  | -0.45306 |
| C  | 4.68783  | 0.33102  | 0.13597  | H | -2.31589 | 2.87435  | -1.90335 |
| C  | 4.00910  | 1.53545  | 0.26263  | H | 1.21057  | -1.16347 | -0.95135 |
| H  | 2.55025  | 3.47729  | 0.51464  | H | 4.92380  | 0.56719  | 0.35764  |
| H  | -2.05479 | -1.01501 | -0.82667 | H | 3.69727  | 2.60899  | 1.08443  |
| H  | -2.52446 | -1.44331 | 1.50845  |   |          |          |          |
| H  | -1.19971 | 0.21588  | 2.41716  |   |          |          |          |
| H  | -4.09731 | 1.00433  | 0.51299  |   |          |          |          |
| H  | -4.56392 | -0.02367 | 1.85178  |   |          |          |          |
| H  | -6.32960 | -1.11021 | -1.04050 |   |          |          |          |
| H  | -2.04877 | 1.87387  | 0.00615  |   |          |          |          |
| H  | -3.28130 | 1.06951  | -2.03728 |   |          |          |          |
| H  | -2.05617 | 2.27869  | -2.46420 |   |          |          |          |
| H  | -1.73989 | 0.54984  | -2.74940 |   |          |          |          |
| H  | 2.01501  | -1.72627 | -0.31655 |   |          |          |          |
| H  | 5.77178  | 0.30330  | 0.19895  |   |          |          |          |
| H  | 4.56280  | 2.45576  | 0.43507  |   |          |          |          |

**1a NMR Conformer 20**

Energy: -875532.9183363

|    |          |          |          |
|----|----------|----------|----------|
| O  | 1.22187  | 3.02937  | 0.89811  |
| C  | 1.78104  | 1.87623  | 0.47275  |
| C  | 1.07665  | 0.80982  | -0.11209 |
| C  | -0.37722 | 0.82135  | -0.31855 |
| N  | -1.04830 | -0.05713 | -0.95407 |
| C  | -2.45730 | 0.30769  | -0.82803 |
| C  | -3.22011 | -0.75960 | -0.05082 |
| O  | -3.41425 | -1.93910 | -0.83157 |
| C  | -2.53561 | -1.16831 | 1.26221  |
| C  | -1.23022 | -1.93820 | 1.14706  |
| O  | -1.22603 | -2.96736 | 0.29381  |
| O  | -0.28117 | -1.75007 | 1.87192  |
| C  | -2.46130 | 1.68386  | -0.11802 |
| C  | -2.90874 | 2.83969  | -0.98443 |
| O  | -1.06283 | 1.85943  | 0.23743  |
| C  | 1.77022  | -0.34081 | -0.51626 |
| C  | 3.13554  | -0.41613 | -0.34700 |
| Cl | 3.99281  | -1.85459 | -0.84791 |
| C  | 3.84797  | 0.64040  | 0.22855  |
| C  | 3.16947  | 1.77412  | 0.63306  |
| H  | 0.25678  | 3.01722  | 0.77667  |
| H  | -2.91268 | 0.38117  | -1.82713 |
| H  | -4.20521 | -0.34565 | 0.21352  |
| H  | -3.22901 | -1.77281 | -1.77404 |
| H  | -3.23612 | -1.82042 | 1.79888  |
| H  | -2.35308 | -0.29542 | 1.89358  |

**1a NMR Conformer 19**

Energy: -875538.4063521

|    |          |          |          |
|----|----------|----------|----------|
| O  | -1.35854 | 2.66171  | -0.51406 |
| C  | -2.24063 | 1.66675  | -0.32500 |
| C  | -1.84896 | 0.32324  | -0.15413 |
| C  | -0.42810 | -0.02289 | -0.18127 |
| N  | 0.52017  | 0.82303  | -0.35890 |
| C  | 1.78559  | 0.08936  | -0.30146 |
| C  | 2.65861  | 0.66250  | 0.82451  |
| O  | 2.00391  | 0.53221  | 2.07339  |
| C  | 3.98807  | -0.06501 | 0.96994  |
| C  | 4.92861  | 0.15231  | -0.19555 |
| O  | 6.06265  | -0.56120 | -0.18382 |
| O  | 4.72510  | 0.92671  | -1.10078 |
| C  | 1.35891  | -1.38355 | -0.07325 |
| C  | 1.76937  | -2.33162 | -1.17972 |
| O  | -0.09240 | -1.31237 | -0.01535 |
| C  | -2.81483 | -0.67255 | 0.04148  |
| C  | -4.15372 | -0.32772 | 0.06549  |
| Cl | -5.36178 | -1.56838 | 0.30461  |
| C  | -4.55553 | 0.99969  | -0.10139 |
| C  | -3.60294 | 1.98750  | -0.29529 |
| H  | -0.44235 | 2.27973  | -0.51036 |
| H  | 2.31863  | 0.21170  | -1.25254 |
| H  | 2.85064  | 1.71863  | 0.59379  |
| H  | 1.22927  | 1.12054  | 2.08305  |
| H  | 3.83546  | -1.14235 | 1.11954  |
| H  | 4.48935  | 0.30066  | 1.87479  |
| H  | 6.12967  | -1.16280 | 0.58305  |
| H  | 1.68005  | -1.74781 | 0.90883  |
| H  | 2.86186  | -2.39522 | -1.22496 |
| H  | 1.37159  | -3.33381 | -1.00360 |
| H  | 1.40476  | -1.96674 | -2.14474 |
| H  | -2.50427 | -1.70506 | 0.17129  |
| H  | -5.61146 | 1.25451  | -0.07894 |
| H  | -3.89655 | 3.02471  | -0.42641 |

**1a NMR Conformer 18**

Energy: -875539.4893456

|   |          |          |         |
|---|----------|----------|---------|
| O | -0.94284 | -0.84408 | 2.58021 |
|---|----------|----------|---------|

|    |          |          |          |
|----|----------|----------|----------|
| C  | -1.81617 | -0.67097 | 1.57560  |
| C  | -1.52653 | 0.11054  | 0.43720  |
| C  | -0.22162 | 0.76011  | 0.32516  |
| N  | 0.70665  | 0.68876  | 1.20890  |
| C  | 1.87396  | 1.39349  | 0.66683  |
| C  | 2.99800  | 0.39407  | 0.36221  |
| O  | 3.49658  | -0.16675 | 1.56218  |
| C  | 2.56232  | -0.70674 | -0.60121 |
| C  | 3.73711  | -1.53190 | -1.06757 |
| O  | 3.37505  | -2.77502 | -1.40258 |
| O  | 4.87535  | -1.12851 | -1.16323 |
| C  | 1.31365  | 2.13293  | -0.56841 |
| C  | 1.06817  | 3.60986  | -0.33467 |
| O  | 0.03559  | 1.47144  | -0.78865 |
| C  | -2.48112 | 0.25672  | -0.57870 |
| C  | -3.70637 | -0.37194 | -0.45663 |
| Cl | -4.90019 | -0.19315 | -1.72173 |
| C  | -4.00631 | -1.14984 | 0.66494  |
| C  | -3.06585 | -1.29622 | 1.67218  |
| H  | -0.11359 | -0.34075 | 2.37358  |
| H  | 2.25911  | 2.10051  | 1.41079  |
| H  | 3.83567  | 0.94645  | -0.07865 |
| H  | 2.76195  | -0.59810 | 2.03428  |
| H  | 2.09324  | -0.29092 | -1.50373 |
| H  | 1.82339  | -1.36388 | -0.13162 |
| H  | 4.16077  | -3.25671 | -1.73835 |
| H  | 1.91217  | 1.96847  | -1.47063 |
| H  | 2.02343  | 4.12330  | -0.19278 |
| H  | 0.55421  | 4.05456  | -1.18966 |
| H  | 0.45773  | 3.75350  | 0.56258  |
| H  | -2.24953 | 0.86133  | -1.45037 |
| H  | -4.97419 | -1.63671 | 0.74506  |
| H  | -3.28088 | -1.89592 | 2.55158  |

**1a NMR Conformer 17**

Energy: -875529.6416011

|   |          |          |          |
|---|----------|----------|----------|
| O | 0.75506  | -2.63312 | 0.24569  |
| C | 1.62388  | -1.60556 | 0.15846  |
| C | 1.26780  | -0.25812 | 0.33031  |
| C | -0.10688 | 0.14697  | 0.65265  |
| N | -0.62459 | 1.29221  | 0.44469  |
| C | -2.03955 | 1.19056  | 0.81281  |
| C | -2.93959 | 1.40138  | -0.42343 |
| O | -3.03877 | 2.77781  | -0.72809 |
| C | -2.46357 | 0.63889  | -1.67636 |
| C | -2.40635 | -0.85973 | -1.52667 |
| O | -3.62626 | -1.40393 | -1.42025 |
| O | -1.39086 | -1.52129 | -1.51211 |
| C | -2.17503 | -0.19162 | 1.49548  |

|    |          |          |          |
|----|----------|----------|----------|
| C  | -2.36788 | -0.11585 | 2.99544  |
| O  | -0.88839 | -0.81251 | 1.22202  |
| C  | 2.23426  | 0.74439  | 0.16698  |
| C  | 3.53500  | 0.40042  | -0.13987 |
| Cl | 4.74031  | 1.65229  | -0.33154 |
| C  | 3.90667  | -0.93847 | -0.29471 |
| C  | 2.95273  | -1.92961 | -0.14768 |
| H  | -0.14269 | -2.30233 | 0.43466  |
| H  | -2.29826 | 1.99206  | 1.51516  |
| H  | -3.95473 | 1.08202  | -0.16109 |
| H  | -2.15885 | 3.11052  | -0.97891 |
| H  | -1.46564 | 0.97998  | -1.95963 |
| H  | -3.16339 | 0.86881  | -2.48591 |
| H  | -3.53643 | -2.37644 | -1.34522 |
| H  | -2.94188 | -0.82288 | 1.03529  |
| H  | -3.33902 | 0.33485  | 3.22041  |
| H  | -2.33320 | -1.11278 | 3.44026  |
| H  | -1.58374 | 0.50275  | 3.44298  |
| H  | 1.94289  | 1.78253  | 0.29463  |
| H  | 4.93500  | -1.19472 | -0.53253 |
| H  | 3.21163  | -2.97651 | -0.27524 |

**1a NMR Conformer 16**

Energy: -875537.0329284

|    |          |          |          |
|----|----------|----------|----------|
| O  | 0.29409  | -1.89469 | -1.61881 |
| C  | 1.29640  | -1.21355 | -1.04487 |
| C  | 1.12515  | 0.04678  | -0.43944 |
| C  | -0.20013 | 0.65829  | -0.40680 |
| N  | -1.25346 | 0.14606  | -0.93607 |
| C  | -2.38214 | 1.00598  | -0.58612 |
| C  | -3.36594 | 0.29191  | 0.35420  |
| O  | -4.13428 | -0.69688 | -0.31665 |
| C  | -2.65469 | -0.40309 | 1.52070  |
| C  | -1.78546 | -1.60527 | 1.18655  |
| O  | -2.24983 | -2.47526 | 0.28748  |
| O  | -0.71574 | -1.80523 | 1.71347  |
| C  | -1.72215 | 2.23732  | 0.08867  |
| C  | -1.78505 | 3.50893  | -0.72777 |
| O  | -0.33468 | 1.82958  | 0.23913  |
| C  | 2.21687  | 0.70215  | 0.14573  |
| C  | 3.46235  | 0.10636  | 0.11765  |
| Cl | 4.82845  | 0.91955  | 0.84708  |
| C  | 3.64804  | -1.14031 | -0.48423 |
| C  | 2.57088  | -1.79234 | -1.05909 |
| H  | -0.54333 | -1.38056 | -1.52199 |
| H  | -2.92451 | 1.29608  | -1.49710 |
| H  | -4.03743 | 1.05491  | 0.77734  |
| H  | -4.58758 | -0.31604 | -1.09048 |
| H  | -3.41387 | -0.75495 | 2.22969  |

|   |          |          |          |
|---|----------|----------|----------|
| H | -2.01678 | 0.30997  | 2.05069  |
| H | -3.07564 | -2.13258 | -0.11313 |
| H | -2.11230 | 2.40536  | 1.10013  |
| H | -2.82669 | 3.82980  | -0.82717 |
| H | -1.21835 | 4.30774  | -0.24395 |
| H | -1.37594 | 3.33350  | -1.72755 |
| H | 2.07347  | 1.67110  | 0.61510  |
| H | 4.63480  | -1.59496 | -0.49793 |
| H | 2.69353  | -2.76335 | -1.52980 |

**1a NMR Conformer 15**

Energy: -875530.3261512

|    |          |          |          |
|----|----------|----------|----------|
| O  | -0.56225 | 2.50937  | 0.26632  |
| C  | -1.53691 | 1.58319  | 0.15154  |
| C  | -1.32431 | 0.19416  | 0.20034  |
| C  | 0.01097  | -0.37681 | 0.44686  |
| N  | 0.48821  | -1.43634 | -0.07619 |
| C  | 1.87827  | -1.53589 | 0.38935  |
| C  | 2.82883  | -1.31284 | -0.80004 |
| O  | 2.71599  | -2.39401 | -1.70264 |
| C  | 2.58924  | 0.00583  | -1.56472 |
| C  | 2.95515  | 1.25797  | -0.81316 |
| O  | 4.26244  | 1.32981  | -0.55553 |
| O  | 2.17389  | 2.12519  | -0.47073 |
| C  | 1.97852  | -0.49690 | 1.52652  |
| C  | 1.91387  | -1.11013 | 2.91182  |
| O  | 0.79386  | 0.31389  | 1.31584  |
| C  | -2.39670 | -0.68523 | 0.00571  |
| C  | -3.66985 | -0.18367 | -0.19831 |
| Cl | -5.00732 | -1.28745 | -0.42473 |
| C  | -3.90106 | 1.19238  | -0.21884 |
| C  | -2.83696 | 2.06460  | -0.04954 |
| H  | 0.33415  | 2.12732  | 0.24078  |
| H  | 2.07590  | -2.54712 | 0.76426  |
| H  | 3.85930  | -1.33213 | -0.42605 |
| H  | 1.77955  | -2.49038 | -1.95274 |
| H  | 1.54361  | 0.08122  | -1.87371 |
| H  | 3.21951  | -0.03582 | -2.45875 |
| H  | 4.45317  | 2.16052  | -0.06829 |
| H  | 2.84556  | 0.16555  | 1.43822  |
| H  | 2.81269  | -1.70652 | 3.09251  |
| H  | 1.84945  | -0.33141 | 3.67484  |
| H  | 1.03912  | -1.76294 | 2.99381  |
| H  | -2.21540 | -1.75576 | 0.03505  |
| H  | -4.90547 | 1.57537  | -0.37437 |
| H  | -2.98981 | 3.13922  | -0.08303 |

**1a NMR Conformer 13**

Energy: -875537.3230574

|    |          |          |          |
|----|----------|----------|----------|
| O  | 2.16999  | 2.58614  | 1.10527  |
| C  | 2.67560  | 1.40738  | 0.68104  |
| C  | 1.94175  | 0.40990  | 0.01053  |
| C  | 0.51060  | 0.53880  | -0.31022 |
| N  | -0.23511 | -0.37714 | -0.78810 |
| C  | -1.57278 | 0.19339  | -0.94743 |
| C  | -2.58693 | -0.67388 | -0.19710 |
| O  | -2.27838 | -0.70310 | 1.19609  |
| C  | -4.00766 | -0.13698 | -0.32887 |
| C  | -5.07394 | -1.02769 | 0.28622  |
| O  | -4.77191 | -1.60919 | 1.45023  |
| O  | -6.15982 | -1.19916 | -0.21902 |
| C  | -1.46593 | 1.64116  | -0.40758 |
| C  | -1.83516 | 2.71864  | -1.40422 |
| O  | -0.05792 | 1.75128  | -0.07475 |
| C  | 2.58259  | -0.77807 | -0.37176 |
| C  | 3.92208  | -0.96568 | -0.09254 |
| Cl | 4.70931  | -2.44717 | -0.57840 |
| C  | 4.65796  | 0.01745  | 0.57267  |
| C  | 4.03301  | 1.19231  | 0.95368  |
| H  | 1.23220  | 2.67549  | 0.86343  |
| H  | -1.84506 | 0.18424  | -2.01290 |
| H  | -2.52872 | -1.69017 | -0.61106 |
| H  | -1.46240 | -1.21951 | 1.33356  |
| H  | -4.26550 | 0.00364  | -1.38143 |
| H  | -4.08228 | 0.84037  | 0.16884  |
| H  | -3.85433 | -1.38327 | 1.72195  |
| H  | -2.01195 | 1.76169  | 0.53497  |
| H  | -2.89614 | 2.63401  | -1.66001 |
| H  | -1.65898 | 3.71349  | -0.98836 |
| H  | -1.24702 | 2.60509  | -2.31976 |
| H  | 2.00979  | -1.54085 | -0.89003 |
| H  | 5.71103  | -0.14069 | 0.78774  |
| H  | 4.58408  | 1.97014  | 1.47354  |

**1a NMR Conformer 12**

Energy: -875536.3395430

|   |          |          |          |
|---|----------|----------|----------|
| O | 0.82234  | 2.83078  | -0.18473 |
| C | 1.67291  | 1.79301  | -0.14019 |
| C | 1.28158  | 0.50275  | 0.27404  |
| C | -0.10719 | 0.26238  | 0.66343  |
| N | -1.02450 | 1.16083  | 0.67341  |
| C | -2.28129 | 0.49705  | 1.02952  |
| C | -3.29622 | 0.59500  | -0.12359 |
| O | -3.83671 | 1.90106  | -0.17505 |
| C | -2.72366 | 0.23931  | -1.50645 |
| C | -2.26992 | -1.18748 | -1.67503 |
| O | -3.26711 | -2.06162 | -1.47545 |
| O | -1.14592 | -1.52881 | -1.97182 |



|    |          |          |          |    |          |          |          |
|----|----------|----------|----------|----|----------|----------|----------|
| O  | 1.18911  | 2.86067  | 0.33748  | C  | -1.85759 | 1.12371  | -0.80289 |
| C  | 1.91651  | 1.72639  | 0.25937  | C  | -2.55296 | 2.03426  | -1.78567 |
| C  | 1.43302  | 0.48819  | -0.20233 | O  | -0.46590 | 1.52785  | -0.63797 |
| C  | 0.04865  | 0.27823  | -0.65798 | C  | 2.46317  | -0.64131 | -0.19324 |
| N  | -0.42837 | -0.80528 | -1.12701 | C  | 3.78673  | -0.58445 | 0.19115  |
| C  | -1.85650 | -0.57432 | -1.37614 | Cl | 4.77991  | -2.02014 | 0.09289  |
| C  | -2.69233 | -1.48810 | -0.46138 | C  | 4.34822  | 0.60832  | 0.65826  |
| O  | -2.40456 | -2.83707 | -0.77771 | C  | 3.56023  | 1.74252  | 0.73424  |
| C  | -2.47187 | -1.23420 | 1.03621  | H  | 0.61262  | 2.77154  | 0.18101  |
| C  | -3.36873 | -0.17778 | 1.63667  | H  | -1.72749 | -0.40878 | -2.34271 |
| O  | -2.93064 | 0.22332  | 2.83417  | H  | -3.71258 | -1.10730 | -1.16708 |
| O  | -4.39006 | 0.24476  | 1.13415  | H  | -1.46766 | -2.80691 | -0.94844 |
| C  | -2.05151 | 0.94489  | -1.17685 | H  | -1.92912 | -1.16325 | 1.30872  |
| C  | -2.21532 | 1.71809  | -2.46914 | H  | -3.20637 | -2.35187 | 1.11497  |
| O  | -0.79699 | 1.33965  | -0.54741 | H  | -4.66120 | 0.24792  | 2.94819  |
| C  | 2.29698  | -0.62023 | -0.23956 | H  | -2.31089 | 1.20950  | 0.19002  |
| C  | 3.60600  | -0.49341 | 0.17621  | H  | -3.59181 | 1.70926  | -1.89672 |
| Cl | 4.66874  | -1.88160 | 0.12977  | H  | -2.55305 | 3.06684  | -1.43021 |
| C  | 4.09767  | 0.73216  | 0.63913  | H  | -2.06228 | 1.99034  | -2.76145 |
| C  | 3.25353  | 1.82718  | 0.67642  | H  | 2.02481  | -1.56478 | -0.55853 |
| H  | 0.27920  | 2.71569  | 0.02828  | H  | 5.39179  | 0.64169  | 0.95617  |
| H  | -2.08663 | -0.86061 | -2.40903 | H  | 3.96885  | 2.68182  | 1.09447  |
| H  | -3.75190 | -1.33302 | -0.69202 |    |          |          |          |
| H  | -1.44138 | -2.96126 | -0.72878 |    |          |          |          |
| H  | -1.42897 | -0.99916 | 1.27319  |    |          |          |          |
| H  | -2.70389 | -2.16282 | 1.57194  |    |          |          |          |
| H  | -3.56546 | 0.86837  | 3.20783  |    |          |          |          |
| H  | -2.84769 | 1.18658  | -0.47013 |    |          |          |          |
| H  | -3.15890 | 1.43651  | -2.94556 |    |          |          |          |
| H  | -2.22761 | 2.79362  | -2.28132 |    |          |          |          |
| H  | -1.39628 | 1.48454  | -3.15600 |    |          |          |          |
| H  | 1.91186  | -1.56964 | -0.59819 |    |          |          |          |
| H  | 5.12965  | 0.82068  | 0.96429  |    |          |          |          |
| H  | 3.60650  | 2.79147  | 1.02919  |    |          |          |          |

**1a NMR Conformer 8**

Energy: -875532.9436877

|   |          |          |          |
|---|----------|----------|----------|
| O | 1.53524  | 2.87466  | 0.47143  |
| C | 2.21096  | 1.71218  | 0.35014  |
| C | 1.65740  | 0.50683  | -0.11932 |
| C | 0.25043  | 0.37310  | -0.52905 |
| N | -0.35264 | -0.71435 | -0.80372 |
| C | -1.70406 | -0.34059 | -1.24510 |
| C | -2.73992 | -1.34464 | -0.72377 |
| O | -2.39198 | -2.63316 | -1.19670 |
| C | -2.88311 | -1.35278 | 0.80174  |
| C | -3.91231 | -0.37958 | 1.32176  |
| O | -3.96969 | -0.38099 | 2.65685  |
| O | -4.62377 | 0.32182  | 0.63251  |

**1a NMR Conformer 7**

Energy: -875536.1302623

|    |          |          |          |
|----|----------|----------|----------|
| O  | 1.80333  | 2.41382  | 1.58722  |
| C  | 2.27570  | 1.29742  | 0.99406  |
| C  | 1.56731  | 0.51456  | 0.06360  |
| C  | 0.19961  | 0.82399  | -0.38072 |
| N  | -0.46940 | 0.17989  | -1.25426 |
| C  | -1.79928 | 0.79381  | -1.30682 |
| C  | -2.83831 | -0.19139 | -0.75794 |
| O  | -2.90268 | -1.34213 | -1.59816 |
| C  | -2.55508 | -0.61137 | 0.69060  |
| C  | -3.63884 | -1.48855 | 1.29296  |
| O  | -4.19885 | -2.39271 | 0.48637  |
| O  | -3.98933 | -1.40359 | 2.44927  |
| C  | -1.66332 | 2.10094  | -0.49715 |
| C  | -1.54081 | 3.34331  | -1.35464 |
| O  | -0.40914 | 1.88903  | 0.21058  |
| C  | 2.17631  | -0.62618 | -0.48544 |
| C  | 3.45788  | -0.97458 | -0.11397 |
| Cl | 4.20463  | -2.39510 | -0.80679 |
| C  | 4.17032  | -0.20558 | 0.81144  |
| C  | 3.57734  | 0.91875  | 1.35571  |
| H  | 0.90107  | 2.61925  | 1.28817  |
| H  | -2.06872 | 1.00070  | -2.34943 |
| H  | -3.82761 | 0.27849  | -0.82438 |
| H  | -1.99626 | -1.67827 | -1.73948 |

|   |          |          |          |
|---|----------|----------|----------|
| H | -2.43994 | 0.25453  | 1.34757  |
| H | -1.61537 | -1.17961 | 0.72076  |
| H | -3.82684 | -2.31521 | -0.42077 |
| H | -2.44049 | 2.21778  | 0.26478  |
| H | -2.48383 | 3.52182  | -1.87942 |
| H | -1.31302 | 4.21613  | -0.73913 |
| H | -0.74763 | 3.21282  | -2.09731 |
| H | 1.62013  | -1.22180 | -1.20261 |
| H | 5.17842  | -0.48986 | 1.09820  |
| H | 4.10765  | 1.53454  | 2.07594  |

**1a NMR Conformer 6**

Energy: -875541.9519124

|    |          |          |          |
|----|----------|----------|----------|
| O  | 1.34615  | -2.48285 | -1.12897 |
| C  | 2.23105  | -1.60661 | -0.62561 |
| C  | 1.88377  | -0.28551 | -0.27659 |
| C  | 0.50766  | 0.17286  | -0.46369 |
| N  | -0.44051 | -0.55264 | -0.93537 |
| C  | -1.65356 | 0.26406  | -0.95319 |
| C  | -2.74641 | -0.42147 | -0.12930 |
| O  | -2.32723 | -0.56575 | 1.22707  |
| C  | -4.03811 | 0.39032  | -0.11941 |
| C  | -5.20710 | -0.30083 | 0.56103  |
| O  | -4.93188 | -0.98944 | 1.67034  |
| O  | -6.34696 | -0.21093 | 0.16511  |
| C  | -1.20203 | 1.63391  | -0.38437 |
| C  | -1.38441 | 2.80006  | -1.33156 |
| O  | 0.21557  | 1.43881  | -0.12628 |
| C  | 2.85179  | 0.58273  | 0.24603  |
| C  | 4.14853  | 0.13415  | 0.41567  |
| Cl | 5.35933  | 1.21338  | 1.06732  |
| C  | 4.50618  | -1.17221 | 0.07305  |
| C  | 3.55187  | -2.03363 | -0.44407 |
| H  | 0.46298  | -2.03917 | -1.20488 |
| H  | -2.01598 | 0.35758  | -1.98689 |
| H  | -2.92725 | -1.41163 | -0.57068 |
| H  | -1.64498 | -1.26048 | 1.28699  |
| H  | -4.34864 | 0.62914  | -1.13934 |
| H  | -3.87234 | 1.33766  | 0.41342  |
| H  | -3.96542 | -0.97524 | 1.84977  |
| H  | -1.66035 | 1.83311  | 0.59079  |
| H  | -2.45114 | 2.95605  | -1.52207 |
| H  | -0.97142 | 3.71670  | -0.90429 |
| H  | -0.88776 | 2.59487  | -2.28469 |
| H  | 2.57569  | 1.59866  | 0.51227  |
| H  | 5.52955  | -1.50932 | 0.21245  |
| H  | 3.81127  | -3.05251 | -0.71585 |

**1a NMR Conformer 5**

Energy: -875540.4842305

|    |          |          |          |
|----|----------|----------|----------|
| O  | 0.87845  | -1.22604 | -2.41802 |
| C  | 1.77398  | -0.91673 | -1.46690 |
| C  | 1.51768  | 0.02911  | -0.45327 |
| C  | 0.22464  | 0.70844  | -0.40982 |
| N  | -0.72553 | 0.52611  | -1.25523 |
| C  | -1.86953 | 1.31638  | -0.79117 |
| C  | -2.99004 | 0.38607  | -0.31183 |
| O  | -3.52874 | -0.34179 | -1.41320 |
| C  | -2.53355 | -0.57960 | 0.78959  |
| C  | -3.65713 | -1.41904 | 1.37240  |
| O  | -4.58841 | -1.85613 | 0.52133  |
| O  | -3.71799 | -1.71497 | 2.54502  |
| C  | -1.27287 | 2.21680  | 0.31352  |
| C  | -1.01491 | 3.64058  | -0.13496 |
| O  | 0.00157  | 1.57347  | 0.59601  |
| C  | 2.49510  | 0.31155  | 0.51132  |
| C  | 3.71006  | -0.34503 | 0.46080  |
| Cl | 4.93228  | 0.00608  | 1.66090  |
| C  | 3.97730  | -1.28601 | -0.53743 |
| C  | 3.01424  | -1.56708 | -1.49309 |
| H  | 0.06051  | -0.68707 | -2.27799 |
| H  | -2.27275 | 1.91384  | -1.61731 |
| H  | -3.81418 | 1.01088  | 0.05523  |
| H  | -2.79953 | -0.76489 | -1.90687 |
| H  | -2.06334 | -0.05122 | 1.62289  |
| H  | -1.78860 | -1.27053 | 0.37106  |
| H  | -4.41274 | -1.51579 | -0.38393 |
| H  | -1.85197 | 2.19227  | 1.24233  |
| H  | -1.96636 | 4.14479  | -0.32702 |
| H  | -0.47466 | 4.19315  | 0.63662  |
| H  | -0.42447 | 3.64538  | -1.05660 |
| H  | 2.28880  | 1.04235  | 1.28735  |
| H  | 4.93747  | -1.79355 | -0.56175 |
| H  | 3.20288  | -2.29470 | -2.27667 |

**1a NMR Conformer 4**

Energy: -875537.4695997

|   |          |          |          |
|---|----------|----------|----------|
| O | -1.21641 | 2.74001  | 0.05042  |
| C | -2.04766 | 1.68707  | 0.11029  |
| C | -1.63433 | 0.37152  | -0.18370 |
| C | -0.25013 | 0.12276  | -0.58477 |
| N | 0.65578  | 1.02721  | -0.67641 |
| C | 1.86503  | 0.36991  | -1.18795 |
| C | 3.11748  | 0.88028  | -0.46578 |
| O | 3.24274  | 2.27023  | -0.70535 |
| C | 3.13456  | 0.58653  | 1.03765  |
| C | 3.77047  | -0.73392 | 1.39603  |
| O | 3.67828  | -0.98968 | 2.70402  |

|    |          |          |          |   |          |          |          |
|----|----------|----------|----------|---|----------|----------|----------|
| O  | 4.32111  | -1.48114 | 0.61472  | H | -2.75294 | 2.44641  | -1.00365 |
| C  | 1.54624  | -1.13314 | -1.05732 | H | -1.53850 | 0.14486  | -1.65735 |
| C  | 1.94163  | -1.98116 | -2.24299 | H | -3.15408 | 0.07060  | -2.34005 |
| O  | 0.09808  | -1.13868 | -0.89679 | H | -1.84979 | -3.24697 | -1.89810 |
| C  | -2.54608 | -0.68945 | -0.09536 | H | -2.47131 | -1.33155 | 1.36557  |
| C  | -3.85240 | -0.43494 | 0.27910  | H | -2.73429 | -0.18335 | 3.57571  |
| Cl | -4.99334 | -1.75597 | 0.38854  | H | -1.31320 | -1.24919 | 3.58581  |
| C  | -4.27639 | 0.86421  | 0.57104  | H | -1.10719 | 0.51081  | 3.40919  |
| C  | -3.37752 | 1.91574  | 0.48605  | H | 1.81700  | -1.43824 | 0.81035  |
| H  | -0.31866 | 2.42403  | -0.22402 | H | 4.98732  | 0.85312  | -0.97264 |
| H  | 1.98008  | 0.64622  | -2.24650 | H | 3.42610  | 2.76813  | -1.28658 |
| H  | 3.99546  | 0.41562  | -0.92607 |   |          |          |          |
| H  | 2.43100  | 2.71355  | -0.40262 |   |          |          |          |
| H  | 2.13243  | 0.63214  | 1.48120  |   |          |          |          |
| H  | 3.72975  | 1.36172  | 1.53419  |   |          |          |          |
| H  | 4.12554  | -1.84070 | 2.89603  |   |          |          |          |
| H  | 1.94858  | -1.55899 | -0.13268 |   |          |          |          |
| H  | 3.03069  | -1.96430 | -2.34768 |   |          |          |          |
| H  | 1.62505  | -3.01709 | -2.10378 |   |          |          |          |
| H  | 1.49227  | -1.58877 | -3.15937 |   |          |          |          |
| H  | -2.21839 | -1.69927 | -0.32273 |   |          |          |          |
| H  | -5.30652 | 1.04638  | 0.86365  |   |          |          |          |
| H  | -3.68692 | 2.93215  | 0.71021  |   |          |          |          |

**1a NMR Conformer 3**

Energy: -875536.8972170

|    |          |          |          |
|----|----------|----------|----------|
| O  | 0.95211  | 2.81309  | -0.61343 |
| C  | 1.74971  | 1.75166  | -0.41884 |
| C  | 1.29652  | 0.55511  | 0.17387  |
| C  | -0.09665 | 0.44790  | 0.60132  |
| N  | -0.96044 | 1.39584  | 0.52029  |
| C  | -2.25041 | 0.82820  | 0.93482  |
| C  | -3.17491 | 0.67034  | -0.28855 |
| O  | -3.55353 | 1.95140  | -0.75468 |
| C  | -2.56999 | -0.14813 | -1.43734 |
| C  | -2.64213 | -1.64535 | -1.26143 |
| O  | -1.72857 | -2.27918 | -2.00019 |
| O  | -3.45526 | -2.23061 | -0.57742 |
| C  | -1.84770 | -0.48090 | 1.64327  |
| C  | -1.74007 | -0.34387 | 3.14885  |
| O  | -0.51663 | -0.73068 | 1.09840  |
| C  | 2.17567  | -0.52240 | 0.35024  |
| C  | 3.48888  | -0.40192 | -0.06251 |
| Cl | 4.59254  | -1.74070 | 0.16090  |
| C  | 3.95177  | 0.77682  | -0.65341 |
| C  | 3.08591  | 1.84402  | -0.82890 |
| H  | 0.04625  | 2.59964  | -0.26950 |
| H  | -2.75213 | 1.51158  | 1.62886  |
| H  | -4.09785 | 0.18403  | 0.04548  |

**1a NMR Conformer 2**

Energy: -875535.3620966

|    |          |          |          |
|----|----------|----------|----------|
| O  | 2.11814  | 2.83510  | 0.33416  |
| C  | 2.63890  | 1.60035  | 0.16896  |
| C  | 1.88843  | 0.42993  | -0.05049 |
| C  | 0.41698  | 0.41021  | -0.12735 |
| N  | -0.31211 | -0.62761 | -0.23874 |
| C  | -1.70712 | -0.17845 | -0.26572 |
| C  | -2.47790 | -0.84785 | 0.87981  |
| O  | -1.92378 | -0.48551 | 2.13165  |
| C  | -3.94157 | -0.43222 | 0.92838  |
| C  | -4.74879 | -0.93157 | -0.24252 |
| O  | -5.97138 | -0.39165 | -0.26554 |
| O  | -4.36592 | -1.73617 | -1.06483 |
| C  | -1.63808 | 1.36383  | -0.15114 |
| C  | -2.22238 | 2.10872  | -1.33180 |
| O  | -0.20825 | 1.61710  | -0.07990 |
| C  | 2.55513  | -0.79703 | -0.19879 |
| C  | 3.93259  | -0.85353 | -0.13106 |
| Cl | 4.74668  | -2.38978 | -0.31860 |
| C  | 4.68712  | 0.30243  | 0.08500  |
| C  | 4.03751  | 1.51520  | 0.23290  |
| H  | 1.14798  | 2.81979  | 0.26307  |
| H  | -2.16344 | -0.48816 | -1.21465 |
| H  | -2.41592 | -1.93391 | 0.73007  |
| H  | -1.02305 | -0.84881 | 2.18717  |
| H  | -4.05277 | 0.65598  | 1.00170  |
| H  | -4.39740 | -0.84278 | 1.83726  |
| H  | -6.47118 | -0.76256 | -1.02361 |
| H  | -2.05433 | 1.71805  | 0.79789  |
| H  | -3.29921 | 1.91651  | -1.38803 |
| H  | -2.06942 | 3.18593  | -1.23378 |
| H  | -1.76137 | 1.76441  | -2.26234 |
| H  | 1.96641  | -1.69346 | -0.36731 |
| H  | 5.77073  | 0.24815  | 0.13571  |
| H  | 4.59872  | 2.42917  | 0.40282  |

**1a** NMR Conformer 1

Energy: -875540.0004709

|    |          |          |          |
|----|----------|----------|----------|
| O  | -1.36216 | 2.65966  | -0.51579 |
| C  | -2.24392 | 1.66362  | -0.33142 |
| C  | -1.85159 | 0.32083  | -0.15149 |
| C  | -0.42919 | -0.02025 | -0.16147 |
| N  | 0.51856  | 0.82841  | -0.32784 |
| C  | 1.78464  | 0.09594  | -0.26489 |
| C  | 2.66979  | 0.68505  | 0.84156  |
| O  | 2.03024  | 0.58018  | 2.10087  |
| C  | 3.99755  | -0.04627 | 0.97812  |
| C  | 4.90581  | 0.13326  | -0.21159 |
| O  | 5.94609  | -0.70426 | -0.17053 |
| O  | 4.74430  | 0.94369  | -1.09820 |
| C  | 1.36100  | -1.37302 | -0.00978 |
| C  | 1.80800  | -2.34853 | -1.07720 |
| O  | -0.09161 | -1.30890 | 0.00963  |
| C  | -2.81797 | -0.67597 | 0.03622  |
| C  | -4.15764 | -0.33321 | 0.04362  |
| Cl | -5.36626 | -1.57542 | 0.27310  |
| C  | -4.56004 | 0.99294  | -0.13194 |
| C  | -3.60725 | 1.98207  | -0.31789 |
| H  | -0.44505 | 2.27974  | -0.50461 |
| H  | 2.30939  | 0.20266  | -1.22317 |
| H  | 2.86050  | 1.73683  | 0.59019  |
| H  | 1.24919  | 1.16064  | 2.10398  |
| H  | 3.85498  | -1.11676 | 1.16589  |
| H  | 4.52960  | 0.34599  | 1.85323  |
| H  | 6.52781  | -0.53146 | -0.94170 |
| H  | 1.66030  | -1.70588 | 0.99028  |
| H  | 2.90196  | -2.40157 | -1.09079 |
| H  | 1.41664  | -3.34978 | -0.88240 |
| H  | 1.46583  | -2.01578 | -2.06186 |
| H  | -2.50670 | -1.70731 | 0.17327  |
| H  | -5.61667 | 1.24607  | -0.12278 |
| H  | -3.90140 | 3.01826  | -0.45622 |



## XYZ Coordinates of Conformers

### for the Diastereomers of 2

#### 2h NMR Conformer 6

Energy: -910280.4668546

|    |          |          |          |
|----|----------|----------|----------|
| O  | 2.28958  | -2.58848 | -0.96823 |
| C  | 2.79355  | -1.38311 | -0.62051 |
| C  | 1.94367  | -0.44237 | -0.01587 |
| C  | 0.52455  | -0.71908 | 0.28941  |
| N  | -0.40247 | 0.15914  | 0.24195  |
| C  | -1.64118 | -0.51288 | 0.64965  |
| C  | -2.64642 | -0.49571 | -0.50424 |
| O  | -2.09365 | -1.09270 | -1.66401 |
| C  | -3.15965 | 0.91181  | -0.87445 |
| O  | -3.95208 | 0.83400  | -2.04035 |
| C  | -3.99721 | 1.50271  | 0.25567  |
| N  | -5.32514 | 1.47201  | 0.06592  |
| O  | -3.45832 | 1.93868  | 1.27346  |
| C  | -1.20473 | -1.94986 | 1.02869  |
| C  | -1.36721 | -2.27587 | 2.49870  |
| O  | 0.20576  | -1.96639 | 0.69104  |
| C  | 2.43615  | 0.82774  | 0.30289  |
| C  | 3.75860  | 1.14666  | 0.04068  |
| Cl | 4.36228  | 2.73365  | 0.45869  |
| C  | 4.61353  | 0.21729  | -0.54675 |
| C  | 4.12575  | -1.03977 | -0.87715 |
| H  | 2.97225  | -3.12909 | -1.40648 |
| H  | -2.07862 | 0.01280  | 1.50538  |
| H  | -3.51109 | -1.11824 | -0.23533 |
| H  | -1.24499 | -0.65563 | -1.86711 |
| H  | -2.29869 | 1.57897  | -1.02290 |
| H  | -3.53788 | 0.19056  | -2.64117 |
| H  | -5.70576 | 1.15617  | -0.81715 |
| H  | -5.93781 | 1.85515  | 0.77606  |
| H  | -1.68757 | -2.70139 | 0.39526  |
| H  | -2.42972 | -2.27002 | 2.76051  |
| H  | -0.95741 | -3.26232 | 2.72777  |
| H  | -0.85415 | -1.52688 | 3.10995  |
| H  | 1.76973  | 1.55079  | 0.76328  |
| H  | 5.64976  | 0.47319  | -0.74789 |
| H  | 4.77979  | -1.77008 | -1.34852 |

#### 2h NMR Conformer 5

Energy: -910277.1685581

|   |          |         |          |
|---|----------|---------|----------|
| O | -1.66669 | 2.40852 | -1.39733 |
| C | -2.50795 | 1.47628 | -0.89804 |

|    |          |          |          |
|----|----------|----------|----------|
| C  | -1.98274 | 0.43232  | -0.11800 |
| C  | -0.54783 | 0.31272  | 0.21313  |
| N  | 0.04574  | -0.79907 | 0.42948  |
| C  | 1.45905  | -0.47844 | 0.68963  |
| C  | 2.27204  | -0.96786 | -0.52211 |
| O  | 1.85684  | -2.26156 | -0.92133 |
| C  | 3.77650  | -1.13583 | -0.27155 |
| O  | 4.40735  | -1.57371 | -1.45599 |
| C  | 4.43414  | 0.16048  | 0.18283  |
| N  | 5.03084  | 0.87539  | -0.78275 |
| O  | 4.35879  | 0.51323  | 1.35963  |
| C  | 1.45800  | 1.05430  | 0.88755  |
| C  | 1.50752  | 1.48022  | 2.34126  |
| O  | 0.16984  | 1.44584  | 0.33420  |
| C  | -2.83895 | -0.56542 | 0.36243  |
| C  | -4.19459 | -0.51277 | 0.08468  |
| Cl | -5.25090 | -1.76114 | 0.70362  |
| C  | -4.72738 | 0.52471  | -0.67725 |
| C  | -3.88140 | 1.51009  | -1.16656 |
| H  | -2.15720 | 3.05483  | -1.93760 |
| H  | 1.79842  | -0.99978 | 1.59344  |
| H  | 2.13054  | -0.25411 | -1.35296 |
| H  | 0.88415  | -2.27505 | -0.94192 |
| H  | 3.90644  | -1.86278 | 0.54273  |
| H  | 3.88740  | -2.31100 | -1.81973 |
| H  | 5.12864  | 0.48792  | -1.71336 |
| H  | 5.50417  | 1.73928  | -0.54404 |
| H  | 2.21638  | 1.56981  | 0.29217  |
| H  | 2.48194  | 1.21812  | 2.75803  |
| H  | 1.35651  | 2.55873  | 2.42876  |
| H  | 0.72276  | 0.96769  | 2.90768  |
| H  | -2.42380 | -1.37201 | 0.95896  |
| H  | -5.79204 | 0.56092  | -0.88906 |
| H  | -4.28241 | 2.31913  | -1.77316 |

#### 2h NMR Conformer 4

Energy: -910283.6187217

|   |          |          |          |
|---|----------|----------|----------|
| O | 2.75416  | 2.71254  | 0.49383  |
| C | 2.96134  | 1.39650  | 0.27530  |
| C | 1.95661  | 0.45891  | -0.03032 |
| C | 0.52998  | 0.80638  | -0.14715 |
| N | -0.41544 | 0.00258  | -0.43913 |
| C | -1.66385 | 0.77191  | -0.39629 |
| C | -2.56123 | 0.24765  | 0.72859  |
| O | -1.89229 | 0.29975  | 1.97609  |
| C | -3.07919 | -1.18835 | 0.50266  |
| O | -3.75651 | -1.63540 | 1.65726  |
| C | -4.03683 | -1.23777 | -0.68442 |
| N | -5.33882 | -1.31808 | -0.37117 |

|    |          |          |          |   |          |          |          |
|----|----------|----------|----------|---|----------|----------|----------|
| O  | -3.60880 | -1.17076 | -1.83713 | H | -2.19857 | 0.91102  | -1.26423 |
| C  | -1.22412 | 2.23800  | -0.16139 | H | -3.26441 | 1.29796  | 0.98247  |
| C  | -1.43806 | 3.14659  | -1.35324 | H | -1.13386 | -0.33107 | 1.90008  |
| O  | 0.20289  | 2.10473  | 0.08448  | H | -2.68333 | -1.62527 | 0.28330  |
| C  | 2.30807  | -0.88496 | -0.23749 | H | -3.54496 | -0.96152 | 2.49514  |
| C  | 3.62611  | -1.28238 | -0.14026 | H | -5.91004 | -0.52949 | 0.70823  |
| Cl | 4.04650  | -2.95956 | -0.40051 | H | -6.32307 | -0.33508 | -0.98672 |
| C  | 4.63114  | -0.36060 | 0.16470  | H | -1.15193 | 2.62370  | 0.89628  |
| C  | 4.29297  | 0.96541  | 0.36908  | H | -1.97929 | 3.52070  | -1.30634 |
| H  | 1.81200  | 2.93954  | 0.40922  | H | -0.31408 | 4.05094  | -0.99081 |
| H  | -2.19272 | 0.66281  | -1.34877 | H | -0.62491 | 2.71963  | -2.13148 |
| H  | -3.42811 | 0.91489  | 0.83199  | H | 2.95432  | 1.54658  | 0.33239  |
| H  | -1.05269 | -0.19316 | 1.90604  | H | 5.28769  | -2.02988 | -0.16545 |
| H  | -2.22931 | -1.84288 | 0.26214  | H | 3.21780  | -3.30482 | -0.70398 |
| H  | -3.27404 | -1.30763 | 2.43587  |   |          |          |          |
| H  | -5.62395 | -1.42893 | 0.59369  |   |          |          |          |
| H  | -6.02728 | -1.35953 | -1.11335 |   |          |          |          |
| H  | -1.65664 | 2.65550  | 0.75285  |   |          |          |          |
| H  | -2.51040 | 3.25435  | -1.54160 |   |          |          |          |
| H  | -1.01553 | 4.13735  | -1.17076 |   |          |          |          |
| H  | -0.96953 | 2.71696  | -2.24415 |   |          |          |          |
| H  | 1.52464  | -1.59845 | -0.47408 |   |          |          |          |
| H  | 5.66564  | -0.68300 | 0.23991  |   |          |          |          |
| H  | 5.05401  | 1.70259  | 0.60688  |   |          |          |          |

### 2h NMR Conformer 3

Energy: -910288.3351582

|    |          |          |          |
|----|----------|----------|----------|
| O  | 0.84052  | -2.34378 | -0.78551 |
| C  | 1.92354  | -1.60830 | -0.48963 |
| C  | 1.85360  | -0.23051 | -0.19492 |
| C  | 0.55412  | 0.44037  | -0.20423 |
| N  | -0.55842 | -0.14243 | -0.47399 |
| C  | -1.62135 | 0.85711  | -0.33562 |
| C  | -2.55912 | 0.47290  | 0.81169  |
| O  | -1.84412 | 0.32683  | 2.02537  |
| C  | -3.37203 | -0.81357 | 0.56072  |
| O  | -4.10508 | -1.14145 | 1.72050  |
| C  | -4.34207 | -0.63203 | -0.60335 |
| N  | -5.62656 | -0.45467 | -0.26062 |
| O  | -3.93059 | -0.62299 | -1.76384 |
| C  | -0.86197 | 2.18022  | -0.06111 |
| C  | -0.94498 | 3.18246  | -1.19276 |
| O  | 0.51975  | 1.74938  | 0.08943  |
| C  | 3.01919  | 0.48635  | 0.10736  |
| C  | 4.23720  | -0.16761 | 0.11473  |
| Cl | 5.69400  | 0.72308  | 0.49395  |
| C  | 4.32227  | -1.53195 | -0.17535 |
| C  | 3.17187  | -2.24431 | -0.47536 |
| H  | 0.04011  | -1.75675 | -0.76449 |

### 2h NMR Conformer 2

Energy: -910280.5262358

|    |          |          |          |
|----|----------|----------|----------|
| O  | -2.00227 | 2.78249  | -0.89497 |
| C  | -2.62324 | 1.62476  | -0.58521 |
| C  | -1.99172 | 0.49020  | -0.04140 |
| C  | -0.55150 | 0.43148  | 0.25820  |
| N  | 0.05830  | -0.53616 | 0.82187  |
| C  | 1.49117  | -0.19478 | 0.83055  |
| C  | 2.19462  | -1.12426 | -0.17459 |
| O  | 1.75014  | -2.45919 | -0.02146 |
| C  | 3.71603  | -1.23779 | -0.00447 |
| O  | 4.23585  | -2.10996 | -0.98441 |
| C  | 4.41466  | 0.10983  | -0.12582 |
| N  | 4.94389  | 0.38157  | -1.32753 |
| O  | 4.42853  | 0.88615  | 0.82961  |
| C  | 1.52281  | 1.30467  | 0.45622  |
| C  | 1.68804  | 2.22738  | 1.64560  |
| O  | 0.19206  | 1.50616  | -0.10925 |
| C  | -2.75484 | -0.65426 | 0.24162  |
| C  | -4.11113 | -0.66614 | -0.01318 |
| Cl | -5.04720 | -2.09919 | 0.34372  |
| C  | -4.74778 | 0.45393  | -0.55467 |
| C  | -4.00294 | 1.58571  | -0.83525 |
| H  | -1.05024 | 2.73332  | -0.70101 |
| H  | 1.90278  | -0.36244 | 1.83338  |
| H  | 1.97859  | -0.76820 | -1.19743 |
| H  | 0.77767  | -2.46019 | 0.00182  |
| H  | 3.91651  | -1.61115 | 1.01002  |
| H  | 3.67911  | -2.90749 | -1.00469 |
| H  | 5.44055  | 1.25386  | -1.46844 |
| H  | 4.96620  | -0.33294 | -2.04504 |
| H  | 2.22802  | 1.54126  | -0.34388 |
| H  | 2.69018  | 2.09697  | 2.05833  |
| H  | 1.55708  | 3.26940  | 1.34437  |

|   |          |          |          |
|---|----------|----------|----------|
| H | 0.94642  | 1.98491  | 2.41384  |
| H | -2.25722 | -1.52301 | 0.66158  |
| H | -5.81558 | 0.43450  | -0.75276 |
| H | -4.47250 | 2.47011  | -1.25542 |

**2h NMR Conformer 1**

Energy: -910284.8126212

|    |          |          |          |
|----|----------|----------|----------|
| O  | 1.72199  | 2.61552  | 0.82874  |
| C  | 2.49652  | 1.59663  | 0.42415  |
| C  | 1.99242  | 0.29897  | 0.19672  |
| C  | 0.56822  | 0.03509  | 0.39730  |
| N  | -0.28511 | 0.91474  | 0.78261  |
| C  | -1.60738 | 0.26950  | 0.77655  |
| C  | -2.41534 | 0.84683  | -0.40018 |
| O  | -2.29725 | 2.25557  | -0.45992 |
| C  | -3.93238 | 0.62845  | -0.31061 |
| O  | -4.55470 | 1.16545  | -1.45687 |
| C  | -4.29866 | -0.84506 | -0.19429 |
| N  | -4.65104 | -1.44612 | -1.33989 |
| O  | -4.21701 | -1.41704 | 0.89269  |
| C  | -1.26349 | -1.23346 | 0.64120  |
| C  | -1.30100 | -1.98845 | 1.95387  |
| O  | 0.11614  | -1.20589 | 0.16361  |
| C  | 2.85071  | -0.72799 | -0.21865 |
| C  | 4.19307  | -0.45748 | -0.40874 |
| Cl | 5.26717  | -1.73583 | -0.92964 |
| C  | 4.70617  | 0.82391  | -0.19004 |
| C  | 3.86125  | 1.84159  | 0.22395  |
| H  | 0.79202  | 2.28625  | 0.93656  |
| H  | -2.12675 | 0.47864  | 1.71921  |
| H  | -2.04843 | 0.39516  | -1.33826 |
| H  | -1.35893 | 2.49143  | -0.55817 |
| H  | -4.29033 | 1.11876  | 0.60616  |
| H  | -4.19073 | 2.05502  | -1.60765 |
| H  | -4.92626 | -2.42164 | -1.32737 |
| H  | -4.77456 | -0.89852 | -2.18302 |
| H  | -1.84049 | -1.74134 | -0.13536 |
| H  | -2.33318 | -2.04216 | 2.30485  |
| H  | -0.91176 | -3.00066 | 1.82265  |
| H  | -0.69173 | -1.47011 | 2.70175  |
| H  | 2.45332  | -1.72426 | -0.38734 |
| H  | 5.76375  | 1.01880  | -0.34360 |
| H  | 4.24133  | 2.84324  | 0.40096  |

**2g NMR Conformer 9**

Energy: -910277.6763514

|   |         |         |          |
|---|---------|---------|----------|
| O | 2.58024 | 2.72019 | 0.11982  |
| C | 2.98859 | 1.43319 | 0.06968  |
| C | 2.03535 | 0.42385 | -0.14918 |

|    |          |          |          |
|----|----------|----------|----------|
| C  | 0.60073  | 0.70129  | -0.36030 |
| N  | -0.34418 | -0.07789 | 0.00419  |
| C  | -1.58476 | 0.51221  | -0.52301 |
| C  | -2.70562 | 0.38414  | 0.50971  |
| O  | -2.27506 | 0.75443  | 1.80601  |
| C  | -3.26903 | -1.05726 | 0.58315  |
| O  | -4.09784 | -1.18264 | 1.71653  |
| C  | -4.08547 | -1.38590 | -0.66406 |
| N  | -5.41715 | -1.32394 | -0.51137 |
| O  | -3.52896 | -1.64813 | -1.73138 |
| C  | -1.17449 | 1.94690  | -0.94010 |
| C  | -1.49126 | 3.07854  | 0.02150  |
| O  | 0.27217  | 1.82266  | -1.03457 |
| C  | 2.43907  | -0.91612 | -0.15406 |
| C  | 3.77105  | -1.24276 | 0.03977  |
| Cl | 4.25983  | -2.92139 | 0.01677  |
| C  | 4.72590  | -0.24975 | 0.24564  |
| C  | 4.32928  | 1.08044  | 0.26304  |
| H  | 3.33420  | 3.30823  | 0.30960  |
| H  | -1.88382 | -0.05754 | -1.41052 |
| H  | -3.53488 | 1.05928  | 0.25940  |
| H  | -1.39175 | 0.36669  | 1.95313  |
| H  | -2.43042 | -1.76772 | 0.62328  |
| H  | -3.70512 | -0.64767 | 2.42833  |
| H  | -6.01823 | -1.53637 | -1.29874 |
| H  | -5.81602 | -1.16980 | 0.40603  |
| H  | -1.53391 | 2.18125  | -1.94489 |
| H  | -2.57287 | 3.19757  | 0.13130  |
| H  | -1.06439 | 2.88393  | 1.00741  |
| H  | -1.07860 | 4.01117  | -0.37038 |
| H  | 1.69455  | -1.68885 | -0.31964 |
| H  | 5.76935  | -0.51251 | 0.39378  |
| H  | 5.06367  | 1.86421  | 0.43524  |

**2g NMR Conformer 8**

Energy: -910282.0096996

|   |          |          |          |
|---|----------|----------|----------|
| O | 2.71425  | 2.84354  | -0.03438 |
| C | 3.10647  | 1.55227  | 0.00478  |
| C | 2.24912  | 0.44446  | -0.13490 |
| C | 0.79702  | 0.56650  | -0.33635 |
| N | -0.04997 | -0.38394 | -0.32436 |
| C | -1.34792 | 0.21289  | -0.67304 |
| C | -2.46394 | -0.44804 | 0.13189  |
| O | -2.40840 | -1.85482 | -0.02632 |
| C | -3.85067 | -0.04751 | -0.37938 |
| O | -4.09075 | -0.56362 | -1.66711 |
| C | -4.91551 | -0.46721 | 0.64310  |
| N | -5.95037 | -1.16267 | 0.15124  |
| O | -4.79758 | -0.14018 | 1.82362  |

|    |          |          |          |   |          |          |          |
|----|----------|----------|----------|---|----------|----------|----------|
| C  | -1.13516 | 1.72717  | -0.44858 | H | 2.48426  | -0.03783 | 1.20010  |
| C  | -1.51843 | 2.27327  | 0.91646  | H | 2.02756  | 2.13304  | 0.31686  |
| O  | 0.31518  | 1.82129  | -0.57330 | H | 3.72777  | -1.46188 | -0.52639 |
| C  | 2.78245  | -0.85315 | -0.07303 | H | 3.98969  | 1.08763  | -1.67897 |
| C  | 4.13544  | -1.03956 | 0.12608  | H | 6.96488  | 0.36699  | 0.73844  |
| Cl | 4.78538  | -2.66128 | 0.19487  | H | 6.24689  | 0.50442  | -0.85468 |
| C  | 4.99522  | 0.05280  | 0.26837  | H | 1.16480  | -2.20700 | -1.34858 |
| C  | 4.47719  | 1.33458  | 0.20691  | H | 2.21668  | -2.43840 | 0.95857  |
| H  | 1.75799  | 2.91436  | -0.19855 | H | 0.79373  | -1.63586 | 1.65490  |
| H  | -1.53362 | 0.01039  | -1.73773 | H | 0.62682  | -3.21333 | 0.85714  |
| H  | -2.38425 | -0.17956 | 1.19179  | H | -2.99215 | -1.67890 | -0.30909 |
| H  | -1.49120 | -2.14643 | 0.11701  | H | -5.86560 | 1.42416  | 0.46493  |
| H  | -3.92086 | 1.04591  | -0.45092 | H | -4.03031 | 3.10622  | 0.52750  |
| H  | -3.69149 | -1.45195 | -1.71431 |   |          |          |          |
| H  | -6.70701 | -1.43725 | 0.76663  |   |          |          |          |
| H  | -6.00698 | -1.36315 | -0.83910 |   |          |          |          |
| H  | -1.55870 | 2.32845  | -1.25576 |   |          |          |          |
| H  | -2.60114 | 2.23784  | 1.06719  |   |          |          |          |
| H  | -1.03830 | 1.69760  | 1.71385  |   |          |          |          |
| H  | -1.19709 | 3.31435  | 0.99496  |   |          |          |          |
| H  | 2.11219  | -1.69960 | -0.18726 |   |          |          |          |
| H  | 6.05882  | -0.10417 | 0.42298  |   |          |          |          |
| H  | 5.12324  | 2.20072  | 0.31432  |   |          |          |          |

**2g NMR Conformer 7**

Energy: -910286.0306359

|    |          |          |          |
|----|----------|----------|----------|
| O  | -1.53639 | 2.62064  | 0.19428  |
| C  | -2.48393 | 1.67028  | 0.14798  |
| C  | -2.19255 | 0.31121  | -0.09056 |
| C  | -0.80797 | -0.10183 | -0.31286 |
| N  | 0.20837  | 0.67933  | -0.26242 |
| C  | 1.37322  | -0.12336 | -0.66227 |
| C  | 2.60463  | 0.26262  | 0.15290  |
| O  | 2.83651  | 1.65723  | 0.06148  |
| C  | 3.87701  | -0.38084 | -0.40653 |
| O  | 4.19784  | 0.13530  | -1.67692 |
| C  | 5.01667  | -0.22660 | 0.60998  |
| N  | 6.16157  | 0.27634  | 0.12756  |
| O  | 4.85125  | -0.57988 | 1.77704  |
| C  | 0.86628  | -1.57708 | -0.50796 |
| C  | 1.14714  | -2.25371 | 0.82350  |
| O  | -0.57697 | -1.39562 | -0.61055 |
| C  | -3.22632 | -0.63474 | -0.12531 |
| C  | -4.53138 | -0.22450 | 0.07447  |
| Cl | -5.82414 | -1.40161 | 0.02971  |
| C  | -4.83458 | 1.11898  | 0.31039  |
| C  | -3.81537 | 2.05749  | 0.34573  |
| H  | -0.65328 | 2.20329  | 0.03722  |
| H  | 1.58409  | 0.09645  | -1.71855 |

**2g NMR Conformer 6**

Energy: -910274.8529101

|    |          |          |          |
|----|----------|----------|----------|
| O  | -2.38309 | -2.86866 | -0.54789 |
| C  | -2.94829 | -1.66920 | -0.28718 |
| C  | -2.12492 | -0.53685 | -0.16764 |
| C  | -0.65261 | -0.58470 | -0.28270 |
| N  | 0.06948  | 0.40297  | -0.64935 |
| C  | 1.46217  | -0.07904 | -0.65760 |
| C  | 2.37663  | 1.05054  | -0.16362 |
| O  | 1.98857  | 2.27367  | -0.76663 |
| C  | 3.85283  | 0.91306  | -0.56710 |
| O  | 4.57193  | 2.04603  | -0.13084 |
| C  | 4.49791  | -0.33561 | 0.01807  |
| N  | 5.27055  | -0.13971 | 1.09712  |
| O  | 4.26362  | -1.44001 | -0.47257 |
| C  | 1.39185  | -1.39053 | 0.16190  |
| C  | 1.71606  | -1.29087 | 1.64337  |
| O  | -0.02288 | -1.72869 | 0.05365  |
| C  | -2.70857 | 0.71571  | 0.05886  |
| C  | -4.08252 | 0.83364  | 0.17991  |
| Cl | -4.79071 | 2.40466  | 0.47738  |
| C  | -4.90713 | -0.28427 | 0.07330  |
| C  | -4.33577 | -1.52650 | -0.16237 |
| H  | -3.06893 | -3.55581 | -0.63513 |
| H  | 1.73299  | -0.30021 | -1.70080 |
| H  | 2.31443  | 1.14459  | 0.93134  |
| H  | 1.02001  | 2.34360  | -0.70899 |
| H  | 3.89585  | 0.81185  | -1.66136 |
| H  | 4.05821  | 2.83780  | -0.36608 |
| H  | 5.48071  | 0.80127  | 1.40701  |
| H  | 5.74729  | -0.92890 | 1.51840  |
| H  | 1.95162  | -2.19537 | -0.31120 |
| H  | 2.77637  | -1.08231 | 1.80595  |
| H  | 1.12327  | -0.50345 | 2.12020  |
| H  | 1.47766  | -2.24185 | 2.12539  |

|   |          |          |          |
|---|----------|----------|----------|
| H | -2.06604 | 1.58660  | 0.14443  |
| H | -5.98425 | -0.18492 | 0.17090  |
| H | -4.96835 | -2.40620 | -0.25877 |

**2g NMR Conformer 5**

Energy: -910275.1128057

|    |          |          |          |
|----|----------|----------|----------|
| O  | -1.95578 | 2.68450  | -0.69295 |
| C  | -2.73265 | 1.61388  | -0.41390 |
| C  | -2.11491 | 0.43526  | 0.03650  |
| C  | -0.65736 | 0.34192  | 0.24967  |
| N  | 0.05611  | -0.67657 | -0.03902 |
| C  | 1.41003  | -0.38756 | 0.47222  |
| C  | 2.43757  | -0.96023 | -0.51221 |
| O  | 2.04293  | -2.26402 | -0.90658 |
| C  | 3.84254  | -1.18013 | 0.06912  |
| O  | 4.66967  | -1.77782 | -0.90518 |
| C  | 4.48934  | 0.11775  | 0.53315  |
| N  | 5.39930  | 0.64422  | -0.30033 |
| O  | 4.14079  | 0.63807  | 1.59280  |
| C  | 1.38266  | 1.14241  | 0.70998  |
| C  | 1.88525  | 2.02013  | -0.42429 |
| O  | -0.04791 | 1.38751  | 0.84335  |
| C  | -2.88845 | -0.70411 | 0.27757  |
| C  | -4.26139 | -0.66161 | 0.09043  |
| Cl | -5.22060 | -2.08841 | 0.40813  |
| C  | -4.88623 | 0.50535  | -0.34165 |
| C  | -4.11941 | 1.63539  | -0.59552 |
| H  | -2.49738 | 3.42010  | -1.03303 |
| H  | 1.52601  | -0.91679 | 1.43009  |
| H  | 2.51752  | -0.31565 | -1.40089 |
| H  | 1.09826  | -2.23571 | -1.13753 |
| H  | 3.74451  | -1.82271 | 0.95626  |
| H  | 4.17642  | -2.51103 | -1.31109 |
| H  | 5.88308  | 1.49491  | -0.03616 |
| H  | 5.69409  | 0.12956  | -1.12122 |
| H  | 1.84509  | 1.41445  | 1.65685  |
| H  | 2.96559  | 1.92071  | -0.55648 |
| H  | 1.38616  | 1.76400  | -1.36444 |
| H  | 1.66215  | 3.06397  | -0.19192 |
| H  | -2.40049 | -1.61225 | 0.61901  |
| H  | -5.96283 | 0.53143  | -0.48300 |
| H  | -4.59565 | 2.54792  | -0.94725 |

**2g NMR Conformer 4**

Energy: -910280.9544106

|   |         |         |          |
|---|---------|---------|----------|
| O | 2.81288 | 2.75620 | -0.34711 |
| C | 3.03965 | 1.43068 | -0.23130 |
| C | 2.03815 | 0.44264 | -0.18237 |
| C | 0.59969 | 0.74556 | -0.25456 |

|    |          |          |          |
|----|----------|----------|----------|
| N  | -0.35287 | -0.08470 | -0.09263 |
| C  | -1.59791 | 0.65381  | -0.35452 |
| C  | -2.68229 | 0.22763  | 0.63584  |
| O  | -2.20045 | 0.19197  | 1.96536  |
| C  | -3.26973 | -1.16474 | 0.29701  |
| O  | -4.07822 | -1.60647 | 1.36363  |
| C  | -4.11731 | -1.10530 | -0.97112 |
| N  | -5.44410 | -1.08443 | -0.77485 |
| O  | -3.58636 | -1.04441 | -2.08103 |
| C  | -1.17745 | 2.14438  | -0.32819 |
| C  | -1.41087 | 2.92443  | 0.95201  |
| O  | 0.26290  | 2.03379  | -0.53910 |
| C  | 2.40614  | -0.90677 | -0.05678 |
| C  | 3.73832  | -1.25929 | 0.02127  |
| Cl | 4.18117  | -2.94394 | 0.17394  |
| C  | 4.74052  | -0.28652 | -0.02590 |
| C  | 4.38579  | 1.04506  | -0.15134 |
| H  | 1.86090  | 2.94352  | -0.41963 |
| H  | -1.94294 | 0.38970  | -1.36075 |
| H  | -3.50701 | 0.95298  | 0.63028  |
| H  | -1.33057 | -0.25046 | 1.96333  |
| H  | -2.44342 | -1.86528 | 0.10663  |
| H  | -3.65250 | -1.32817 | 2.19311  |
| H  | -6.06458 | -1.04870 | -1.57497 |
| H  | -5.82206 | -1.19934 | 0.15706  |
| H  | -1.57472 | 2.68133  | -1.19226 |
| H  | -2.48200 | 3.01019  | 1.15450  |
| H  | -0.94061 | 2.42968  | 1.80413  |
| H  | -0.99971 | 3.93107  | 0.84430  |
| H  | 1.62525  | -1.66049 | -0.02642 |
| H  | 5.78620  | -0.57448 | 0.03289  |
| H  | 5.14424  | 1.82116  | -0.19113 |

**2g NMR Conformer 3**

Energy: -910285.8626516

|   |          |          |          |
|---|----------|----------|----------|
| O | 0.88901  | -2.48451 | -0.32624 |
| C | 1.95836  | -1.68474 | -0.19176 |
| C | 1.86991  | -0.27756 | -0.24170 |
| C | 0.56639  | 0.35313  | -0.44538 |
| N | -0.53168 | -0.29423 | -0.60983 |
| C | -1.61322 | 0.69680  | -0.69114 |
| C | -2.50311 | 0.57552  | 0.55167  |
| O | -1.75082 | 0.66925  | 1.74815  |
| C | -3.32573 | -0.73204 | 0.59133  |
| O | -4.00287 | -0.82656 | 1.82512  |
| C | -4.35255 | -0.77092 | -0.53766 |
| N | -5.61510 | -0.49814 | -0.17631 |
| O | -4.00328 | -1.00755 | -1.69460 |
| C | -0.85257 | 2.04230  | -0.83860 |

|    |          |          |          |   |          |          |          |
|----|----------|----------|----------|---|----------|----------|----------|
| C  | -1.32043 | 3.22753  | -0.02328 | H | 1.71662  | 2.53403  | 0.51648  |
| O  | 0.50784  | 1.69358  | -0.45056 | H | 4.10196  | 0.87156  | -1.33743 |
| C  | 3.02190  | 0.50729  | -0.09728 | H | 4.70631  | 2.11678  | 0.62996  |
| C  | 4.24428  | -0.10841 | 0.09739  | H | 5.44570  | -2.35922 | 0.72965  |
| Cl | 5.68460  | 0.86685  | 0.27879  | H | 5.59457  | -0.71810 | 1.33148  |
| C  | 4.34732  | -1.50116 | 0.15014  | H | 1.51230  | -1.94078 | -1.08968 |
| C  | 3.21072  | -2.28101 | 0.00596  | H | 2.53770  | -1.91751 | 1.22635  |
| H  | 0.08472  | -1.92017 | -0.47140 | H | 1.04643  | -1.17779 | 1.85442  |
| H  | -2.22741 | 0.50426  | -1.57382 | H | 1.01554  | -2.81853 | 1.17933  |
| H  | -3.20766 | 1.41695  | 0.57934  | H | -2.70203 | -1.75379 | -0.12886 |
| H  | -1.04580 | -0.00542 | 1.73539  | H | -5.88341 | 1.11153  | 0.26363  |
| H  | -2.64931 | -1.58678 | 0.44296  | H | -4.22423 | 2.96572  | 0.16149  |
| H  | -3.41081 | -0.49331 | 2.52180  |   |          |          |          |
| H  | -5.84869 | -0.37182 | 0.80052  |   |          |          |          |
| H  | -6.34714 | -0.51346 | -0.87664 |   |          |          |          |
| H  | -0.79926 | 2.30732  | -1.90064 |   |          |          |          |
| H  | -2.32345 | 3.52295  | -0.34493 |   |          |          |          |
| H  | -1.34138 | 2.98400  | 1.04068  |   |          |          |          |
| H  | -0.65111 | 4.07512  | -0.18741 |   |          |          |          |
| H  | 2.94302  | 1.58939  | -0.14019 |   |          |          |          |
| H  | 5.31614  | -1.96845 | 0.30242  |   |          |          |          |
| H  | 3.27079  | -3.36457 | 0.04247  |   |          |          |          |

**2g NMR Conformer 2**

Energy: -910282.4639662

|    |          |          |          |
|----|----------|----------|----------|
| O  | -1.68539 | 2.69726  | -0.08495 |
| C  | -2.53569 | 1.65905  | -0.03778 |
| C  | -2.10716 | 0.31794  | -0.12089 |
| C  | -0.68292 | 0.02326  | -0.27575 |
| N  | 0.24693  | 0.90733  | -0.29112 |
| C  | 1.50672  | 0.19986  | -0.57944 |
| C  | 2.64496  | 0.82879  | 0.23743  |
| O  | 2.57299  | 2.24259  | 0.16009  |
| C  | 4.05774  | 0.53218  | -0.29194 |
| O  | 5.01003  | 1.20144  | 0.50298  |
| C  | 4.38181  | -0.95543 | -0.29941 |
| N  | 5.16996  | -1.38419 | 0.69750  |
| O  | 3.89730  | -1.68794 | -1.16185 |
| C  | 1.13925  | -1.28319 | -0.30739 |
| C  | 1.45953  | -1.82594 | 1.07469  |
| O  | -0.31741 | -1.25909 | -0.43030 |
| C  | -3.04192 | -0.72462 | -0.06427 |
| C  | -4.38530 | -0.42786 | 0.07351  |
| Cl | -5.55420 | -1.72696 | 0.14640  |
| C  | -4.82416 | 0.89612  | 0.15589  |
| C  | -3.90298 | 1.93033  | 0.09948  |
| H  | -0.76299 | 2.34966  | -0.18662 |
| H  | 1.73468  | 0.34330  | -1.64569 |
| H  | 2.58462  | 0.51266  | 1.28937  |

**2g NMR Conformer 1**

Energy: -910278.4650366

|    |          |          |          |
|----|----------|----------|----------|
| O  | -2.26982 | -2.92309 | 0.09256  |
| C  | -2.82923 | -1.69476 | 0.06142  |
| C  | -2.12141 | -0.49169 | -0.12095 |
| C  | -0.66085 | -0.43257 | -0.29155 |
| N  | 0.05070  | 0.62320  | -0.31767 |
| C  | 1.43305  | 0.19639  | -0.60022 |
| C  | 2.39475  | 1.08378  | 0.20341  |
| O  | 1.98923  | 2.43809  | 0.10526  |
| C  | 3.83930  | 1.11268  | -0.32009 |
| O  | 4.60321  | 2.01563  | 0.44787  |
| C  | 4.50107  | -0.25760 | -0.27103 |
| N  | 5.35156  | -0.45730 | 0.74666  |
| O  | 4.21123  | -1.11327 | -1.10735 |
| C  | 1.41408  | -1.32387 | -0.30468 |
| C  | 1.82763  | -1.75825 | 1.09052  |
| O  | -0.01243 | -1.61763 | -0.44522 |
| C  | -2.82098 | 0.72571  | -0.12950 |
| C  | -4.19035 | 0.74164  | 0.04292  |
| Cl | -5.04680 | 2.26615  | 0.02739  |
| C  | -4.90274 | -0.44647 | 0.22633  |
| C  | -4.22040 | -1.65044 | 0.23372  |
| H  | -1.31026 | -2.87387 | -0.06091 |
| H  | 1.62456  | 0.36916  | -1.66965 |
| H  | 2.40530  | 0.77832  | 1.26079  |
| H  | 1.03483  | 2.48394  | 0.28802  |
| H  | 3.80920  | 1.41483  | -1.37720 |
| H  | 4.09297  | 2.83770  | 0.54542  |
| H  | 5.84415  | -1.34056 | 0.81750  |
| H  | 5.60218  | 0.31070  | 1.35749  |
| H  | 1.93166  | -1.89491 | -1.07254 |
| H  | 2.89677  | -1.60170 | 1.25254  |
| H  | 1.26970  | -1.20552 | 1.85329  |
| H  | 1.61894  | -2.82391 | 1.21162  |
| H  | -2.26490 | 1.64678  | -0.27493 |

|   |          |          |         |
|---|----------|----------|---------|
| H | -5.98052 | -0.42371 | 0.35943 |
| H | -4.74962 | -2.58822 | 0.37394 |

**2f NMR Conformer 6**

Energy: -910278.5257231

|    |          |          |          |
|----|----------|----------|----------|
| O  | 0.61664  | -2.27642 | -1.16799 |
| C  | 1.61556  | -1.48994 | -0.73437 |
| C  | 1.46173  | -0.10353 | -0.52823 |
| C  | 0.16635  | 0.52685  | -0.78038 |
| N  | -0.86508 | -0.08871 | -1.22898 |
| C  | -1.96659 | 0.87703  | -1.27530 |
| C  | -3.21690 | 0.30111  | -0.58759 |
| O  | -3.56908 | -0.89291 | -1.27292 |
| C  | -3.21367 | 0.00618  | 0.93539  |
| O  | -4.35016 | -0.77245 | 1.24249  |
| C  | -1.92536 | -0.65593 | 1.43250  |
| N  | -1.91443 | -1.99994 | 1.42230  |
| O  | -0.96955 | 0.03486  | 1.78360  |
| C  | -1.32399 | 2.21622  | -0.80634 |
| C  | -1.89658 | 2.94244  | 0.39447  |
| O  | 0.04780  | 1.83326  | -0.50702 |
| C  | 2.54071  | 0.66218  | -0.06817 |
| C  | 3.75600  | 0.04986  | 0.17796  |
| Cl | 5.10356  | 1.00569  | 0.75337  |
| C  | 3.92368  | -1.32209 | -0.02428 |
| C  | 2.85769  | -2.08410 | -0.47717 |
| H  | -0.19242 | -1.71996 | -1.29735 |
| H  | -2.28002 | 0.98512  | -2.32061 |
| H  | -4.05279 | 0.99071  | -0.75900 |
| H  | -2.77435 | -1.44968 | -1.36861 |
| H  | -3.29922 | 0.94464  | 1.48749  |
| H  | -4.61041 | -1.26145 | 0.44162  |
| H  | -2.77227 | -2.52027 | 1.28656  |
| H  | -1.09524 | -2.48938 | 1.76498  |
| H  | -1.26777 | 2.89548  | -1.66199 |
| H  | -2.96692 | 3.12538  | 0.25566  |
| H  | -1.73202 | 2.35700  | 1.30037  |
| H  | -1.40092 | 3.90952  | 0.50726  |
| H  | 2.41189  | 1.72819  | 0.09198  |
| H  | 4.88500  | -1.78757 | 0.17389  |
| H  | 2.96645  | -3.15234 | -0.63898 |

**2f NMR Conformer 5**

Energy: -910273.3693083

|   |          |          |          |
|---|----------|----------|----------|
| O | 2.12290  | 2.74035  | -0.28112 |
| C | 2.79031  | 1.56656  | -0.21837 |
| C | 2.05074  | 0.37388  | -0.14767 |
| C | 0.57543  | 0.35571  | -0.17854 |
| N | -0.16056 | -0.42635 | 0.51300  |

|    |          |          |          |
|----|----------|----------|----------|
| C  | -1.53221 | -0.20141 | 0.01422  |
| C  | -2.56029 | -0.51685 | 1.09887  |
| O  | -2.50346 | 0.36166  | 2.20451  |
| C  | -4.00989 | -0.48484 | 0.60462  |
| O  | -4.41374 | 0.80732  | 0.20571  |
| C  | -4.18333 | -1.45335 | -0.56131 |
| N  | -4.61215 | -0.91300 | -1.71136 |
| O  | -3.91278 | -2.64543 | -0.41623 |
| C  | -1.44384 | 1.19569  | -0.63384 |
| C  | -1.62970 | 2.42434  | 0.24127  |
| O  | -0.04100 | 1.19130  | -1.04578 |
| C  | 2.71943  | -0.84779 | -0.02202 |
| C  | 4.10483  | -0.88013 | 0.01265  |
| Cl | 4.92906  | -2.41545 | 0.15857  |
| C  | 4.84792  | 0.29437  | -0.07315 |
| C  | 4.18765  | 1.51143  | -0.18434 |
| H  | 2.74910  | 3.48738  | -0.28482 |
| H  | -1.69475 | -0.93807 | -0.79008 |
| H  | -2.35649 | -1.54887 | 1.41742  |
| H  | -1.61275 | 0.31704  | 2.59239  |
| H  | -4.64628 | -0.85608 | 1.42012  |
| H  | -4.51489 | 1.35825  | 1.00041  |
| H  | -4.85315 | 0.06900  | -1.75825 |
| H  | -4.75796 | -1.51006 | -2.51713 |
| H  | -2.04533 | 1.25922  | -1.54302 |
| H  | -2.66409 | 2.52096  | 0.56635  |
| H  | -0.98772 | 2.37225  | 1.12438  |
| H  | -1.34840 | 3.30660  | -0.33951 |
| H  | 2.13891  | -1.76350 | 0.03966  |
| H  | 5.93327  | 0.26046  | -0.04918 |
| H  | 4.75769  | 2.43637  | -0.23702 |

**2f NMR Conformer 4**

Energy: -910274.5525904

|   |          |          |          |
|---|----------|----------|----------|
| O | 0.55163  | 2.25509  | -0.02002 |
| C | 1.66471  | 1.49778  | 0.03749  |
| C | 1.65252  | 0.09505  | 0.14313  |
| C | 0.39068  | -0.64680 | 0.29084  |
| N | -0.67261 | -0.22130 | 0.85113  |
| C | -1.61637 | -1.34636 | 0.82515  |
| C | -3.07841 | -0.90648 | 0.71072  |
| O | -3.43767 | -0.22596 | 1.90622  |
| C | -3.56953 | -0.04949 | -0.48231 |
| O | -4.93287 | 0.25068  | -0.27154 |
| C | -2.74211 | 1.22051  | -0.69272 |
| N | -3.17336 | 2.31924  | -0.05651 |
| O | -1.72010 | 1.19707  | -1.38546 |
| C | -1.00780 | -2.33950 | -0.19260 |
| C | -1.52261 | -2.30328 | -1.61880 |

|    |          |          |          |
|----|----------|----------|----------|
| O  | 0.38176  | -1.90912 | -0.20568 |
| C  | 2.85919  | -0.61637 | 0.12898  |
| C  | 4.06048  | 0.06792  | 0.06078  |
| Cl | 5.56423  | -0.82627 | 0.06154  |
| C  | 4.08807  | 1.46078  | -0.00806 |
| C  | 2.89361  | 2.16556  | -0.02615 |
| H  | -0.24002 | 1.71723  | -0.21980 |
| H  | -1.57509 | -1.81477 | 1.81958  |
| H  | -3.69998 | -1.81150 | 0.69326  |
| H  | -2.77119 | 0.46127  | 2.09400  |
| H  | -3.49973 | -0.61485 | -1.41325 |
| H  | -5.09833 | 0.28538  | 0.68783  |
| H  | -4.08584 | 2.33712  | 0.38296  |
| H  | -2.68854 | 3.19857  | -0.20374 |
| H  | -1.02062 | -3.35856 | 0.20060  |
| H  | -2.55688 | -2.65913 | -1.66129 |
| H  | -1.46725 | -1.28758 | -2.02142 |
| H  | -0.91202 | -2.96479 | -2.23802 |
| H  | 2.84191  | -1.70050 | 0.18944  |
| H  | 5.03704  | 1.98660  | -0.06004 |
| H  | 2.88989  | 3.24858  | -0.10537 |

**2f NMR Conformer 3**

Energy: -910272.8050330

|    |          |          |          |
|----|----------|----------|----------|
| O  | 0.97159  | 2.41830  | 1.07421  |
| C  | 1.81869  | 1.45779  | 0.64638  |
| C  | 1.45023  | 0.43009  | -0.23993 |
| C  | 0.10405  | 0.36305  | -0.83884 |
| N  | -0.56024 | -0.70292 | -1.05154 |
| C  | -1.86014 | -0.28913 | -1.59675 |
| C  | -2.98804 | -0.89912 | -0.74281 |
| O  | -2.79016 | -2.30526 | -0.72579 |
| C  | -3.22474 | -0.42277 | 0.71792  |
| O  | -4.06187 | -1.35726 | 1.36154  |
| C  | -1.94593 | -0.17608 | 1.52124  |
| N  | -1.50831 | -1.19242 | 2.27195  |
| O  | -1.37585 | 0.91836  | 1.45296  |
| C  | -1.73160 | 1.24603  | -1.80051 |
| C  | -2.79046 | 2.17691  | -1.24318 |
| O  | -0.45093 | 1.54588  | -1.18261 |
| C  | 2.37901  | -0.55851 | -0.58602 |
| C  | 3.66878  | -0.49659 | -0.08654 |
| Cl | 4.82963  | -1.72426 | -0.53931 |
| C  | 4.05815  | 0.53792  | 0.76411  |
| C  | 3.13157  | 1.50332  | 1.13005  |
| H  | 0.04684  | 2.13112  | 0.96262  |
| H  | -1.99318 | -0.76670 | -2.57453 |
| H  | -3.94168 | -0.74198 | -1.26147 |
| H  | -1.84480 | -2.47948 | -0.55939 |

|   |          |          |          |
|---|----------|----------|----------|
| H | -3.75030 | 0.53541  | 0.70096  |
| H | -3.95012 | -2.21771 | 0.91851  |
| H | -0.67760 | -1.07031 | 2.84093  |
| H | -2.07800 | -2.01978 | 2.40056  |
| H | -1.59878 | 1.43742  | -2.87037 |
| H | -3.78478 | 1.86355  | -1.57711 |
| H | -2.75238 | 2.18825  | -0.15322 |
| H | -2.61753 | 3.19212  | -1.60798 |
| H | 2.07984  | -1.35357 | -1.26287 |
| H | 5.07477  | 0.57995  | 1.14430  |
| H | 3.40403  | 2.30399  | 1.81126  |

**2f NMR Conformer 2**

Energy: -910277.0598735

|    |          |          |          |
|----|----------|----------|----------|
| O  | 2.26487  | 2.81909  | -0.57945 |
| C  | 2.79719  | 1.59176  | -0.39547 |
| C  | 2.05033  | 0.41430  | -0.20166 |
| C  | 0.57937  | 0.39013  | -0.16459 |
| N  | -0.15173 | -0.59503 | 0.17852  |
| C  | -1.53973 | -0.16636 | -0.07674 |
| C  | -2.51035 | -0.89811 | 0.84923  |
| O  | -2.35973 | -0.55280 | 2.21070  |
| C  | -3.97939 | -0.65429 | 0.49657  |
| O  | -4.34061 | 0.70610  | 0.61242  |
| C  | -4.25997 | -1.13660 | -0.92547 |
| N  | -4.78632 | -0.22642 | -1.75751 |
| O  | -3.98976 | -2.29336 | -1.24806 |
| C  | -1.44630 | 1.37365  | -0.07551 |
| C  | -1.53948 | 2.11652  | 1.24581  |
| O  | -0.06436 | 1.53180  | -0.54620 |
| C  | 2.72126  | -0.80512 | -0.01740 |
| C  | 4.10122  | -0.84634 | -0.02121 |
| Cl | 4.92250  | -2.37366 | 0.20473  |
| C  | 4.85203  | 0.31694  | -0.20897 |
| C  | 4.19766  | 1.52250  | -0.39444 |
| H  | 1.29276  | 2.77370  | -0.60086 |
| H  | -1.78263 | -0.49095 | -1.10205 |
| H  | -2.32102 | -1.97009 | 0.70059  |
| H  | -1.46193 | -0.79463 | 2.49609  |
| H  | -4.58887 | -1.27777 | 1.16515  |
| H  | -4.51532 | 0.90836  | 1.54690  |
| H  | -5.01082 | -0.49397 | -2.70880 |
| H  | -5.01860 | 0.69996  | -1.42240 |
| H  | -2.09082 | 1.82066  | -0.83429 |
| H  | -2.54796 | 2.05932  | 1.65092  |
| H  | -0.84710 | 1.69491  | 1.97914  |
| H  | -1.27921 | 3.16485  | 1.07565  |
| H  | 2.13470  | -1.70759 | 0.12526  |
| H  | 5.93735  | 0.27362  | -0.21197 |



H 4.75702 2.44132 -0.54295

**2f** NMR Conformer 1

Energy: -910281.4362375

|    |          |          |          |
|----|----------|----------|----------|
| O  | -1.53179 | 2.67751  | 0.30052  |
| C  | -2.41361 | 1.68193  | 0.11778  |
| C  | -2.02006 | 0.33885  | -0.05961 |
| C  | -0.59735 | 0.00335  | -0.06263 |
| N  | 0.35043  | 0.84629  | 0.13568  |
| C  | 1.60321  | 0.10637  | -0.09777 |
| C  | 2.75265  | 0.70804  | 0.71078  |
| O  | 2.60662  | 0.55188  | 2.10657  |
| C  | 4.11809  | 0.11701  | 0.35070  |
| O  | 4.19957  | -1.26157 | 0.64308  |
| C  | 4.40997  | 0.34226  | -1.13109 |
| N  | 4.68813  | -0.75763 | -1.84541 |
| O  | 4.36550  | 1.47927  | -1.60055 |
| C  | 1.16786  | -1.36364 | 0.09211  |
| C  | 1.17877  | -1.95878 | 1.48904  |
| O  | -0.24294 | -1.27243 | -0.30468 |
| C  | -2.98554 | -0.66080 | -0.23851 |
| C  | -4.32547 | -0.31929 | -0.24287 |
| Cl | -5.53426 | -1.56452 | -0.46258 |
| C  | -4.72999 | 1.00726  | -0.07224 |
| C  | -3.77798 | 1.99897  | 0.10639  |
| H  | -0.61431 | 2.29926  | 0.28271  |
| H  | 1.85828  | 0.25321  | -1.15990 |
| H  | 2.78671  | 1.77307  | 0.44243  |
| H  | 1.80662  | 1.02380  | 2.39494  |
| H  | 4.87893  | 0.67941  | 0.90957  |
| H  | 4.33917  | -1.37217 | 1.59878  |
| H  | 4.74198  | -1.66197 | -1.39380 |
| H  | 4.90754  | -0.66792 | -2.83073 |
| H  | 1.65605  | -2.02343 | -0.62741 |
| H  | 2.19832  | -2.08863 | 1.84732  |
| H  | 0.64337  | -1.31465 | 2.19131  |
| H  | 0.68187  | -2.93178 | 1.45386  |
| H  | -2.67141 | -1.69164 | -0.37168 |
| H  | -5.78700 | 1.25787  | -0.07908 |
| H  | -4.07268 | 3.03526  | 0.24171  |

**2e** NMR Conformer 8

Energy: -910285.0601109

|   |          |         |         |
|---|----------|---------|---------|
| O | 1.74858  | 2.63731 | 0.91050 |
| C | 2.51439  | 1.62131 | 0.48240 |
| C | 2.00025  | 0.32936 | 0.24503 |
| C | 0.57628  | 0.07141 | 0.46235 |
| N | -0.25896 | 0.94698 | 0.89231 |
| C | -1.59203 | 0.32089 | 0.87969 |

|    |          |          |          |
|----|----------|----------|----------|
| C  | -2.39635 | 0.99521  | -0.24146 |
| O  | -1.98656 | 0.53102  | -1.51863 |
| C  | -3.92314 | 0.84077  | -0.19260 |
| O  | -4.49578 | 1.52004  | -1.28732 |
| C  | -4.38485 | -0.61618 | -0.10758 |
| N  | -5.02962 | -1.09914 | -1.17904 |
| O  | -4.15690 | -1.26992 | 0.91125  |
| C  | -1.27297 | -1.17886 | 0.66737  |
| C  | -1.31610 | -1.99265 | 1.94494  |
| O  | 0.10786  | -1.15483 | 0.19154  |
| C  | 2.84623  | -0.69532 | -0.19866 |
| C  | 4.18765  | -0.42933 | -0.40386 |
| Cl | 5.24650  | -1.70647 | -0.95909 |
| C  | 4.71109  | 0.84563  | -0.17419 |
| C  | 3.87738  | 1.86202  | 0.26612  |
| H  | 0.81733  | 2.30756  | 1.02175  |
| H  | -2.09304 | 0.48761  | 1.83989  |
| H  | -2.21007 | 2.07520  | -0.16143 |
| H  | -1.17994 | 0.99855  | -1.79583 |
| H  | -4.28221 | 1.31795  | 0.72694  |
| H  | -3.87892 | 1.45477  | -2.03879 |
| H  | -5.39802 | -2.04300 | -1.15262 |
| H  | -5.27898 | -0.48711 | -1.94529 |
| H  | -1.86085 | -1.62997 | -0.13219 |
| H  | -2.34605 | -2.04290 | 2.30183  |
| H  | -0.94710 | -3.00522 | 1.76502  |
| H  | -0.69068 | -1.52224 | 2.71120  |
| H  | 2.44052  | -1.68668 | -0.37628 |
| H  | 5.76748  | 1.03696  | -0.33986 |
| H  | 4.26558  | 2.85911  | 0.45117  |

**2e** NMR Conformer 6

Energy: -910278.3681241

|   |          |          |          |
|---|----------|----------|----------|
| O | -0.53437 | -2.33205 | -0.17642 |
| C | -1.63153 | -1.55658 | -0.05198 |
| C | -1.58581 | -0.15511 | 0.02340  |
| C | -0.29922 | 0.57163  | 0.07844  |
| N | 0.64353  | 0.36253  | 0.90806  |
| C | 1.66283  | 1.38417  | 0.62676  |
| C | 3.08644  | 0.82923  | 0.68735  |
| O | 3.29323  | 0.20052  | 1.93908  |
| C | 3.57725  | -0.11692 | -0.43437 |
| O | 4.87861  | -0.55230 | -0.11175 |
| C | 2.63349  | -1.29111 | -0.67586 |
| N | 2.95898  | -2.44714 | -0.09337 |
| O | 1.60852  | -1.13235 | -1.35609 |
| C | 1.21283  | 2.04653  | -0.69242 |
| C | 1.22774  | 3.55910  | -0.67957 |

|    |          |          |          |   |          |          |          |
|----|----------|----------|----------|---|----------|----------|----------|
| O  | -0.14919 | 1.56453  | -0.82885 | H | -3.35708 | 0.68807  | 1.68288  |
| C  | -2.77300 | 0.58312  | 0.08174  | H | -4.67446 | -1.36086 | 0.33719  |
| C  | -3.99053 | -0.07709 | 0.12006  | H | -2.87862 | -2.73633 | 1.05114  |
| Cl | -5.47140 | 0.84941  | 0.21566  | H | -1.21341 | -2.79111 | 1.56535  |
| C  | -4.05037 | -1.46965 | 0.08919  | H | -1.78725 | 2.10093  | 0.97028  |
| C  | -2.87407 | -2.19991 | -0.00383 | H | -2.59414 | 3.80078  | -0.70587 |
| H  | 0.23027  | -1.83303 | -0.54615 | H | -1.04144 | 4.27441  | 0.00992  |
| H  | 1.61640  | 2.11789  | 1.44623  | H | -1.09128 | 3.57960  | -1.62866 |
| H  | 3.78086  | 1.67951  | 0.66280  | H | 2.37405  | 1.57330  | 0.62036  |
| H  | 2.53035  | -0.37569 | 2.13184  | H | 4.94367  | -1.74919 | -0.29848 |
| H  | 3.62785  | 0.43327  | -1.38076 | H | 3.05212  | -2.89190 | -1.44690 |
| H  | 4.97400  | -0.54861 | 0.85813  |   |          |          |          |
| H  | 2.38731  | -3.27118 | -0.25090 |   |          |          |          |
| H  | 3.85842  | -2.55525 | 0.36089  |   |          |          |          |
| H  | 1.76268  | 1.65423  | -1.55576 |   |          |          |          |
| H  | 2.25560  | 3.91361  | -0.55375 |   |          |          |          |
| H  | 0.83730  | 3.96126  | -1.61695 |   |          |          |          |
| H  | 0.62381  | 3.93696  | 0.15030  |   |          |          |          |
| H  | -2.73083 | 1.66840  | 0.11880  |   |          |          |          |
| H  | -5.01060 | -1.97611 | 0.12320  |   |          |          |          |
| H  | -2.89786 | -3.28426 | -0.05816 |   |          |          |          |

**2e NMR Conformer 5**

Energy: -910283.0069564

|    |          |          |          |
|----|----------|----------|----------|
| O  | 0.67138  | -1.97386 | -1.69662 |
| C  | 1.65465  | -1.31065 | -1.06632 |
| C  | 1.46588  | -0.04193 | -0.48001 |
| C  | 0.15059  | 0.59356  | -0.54269 |
| N  | -0.87565 | 0.07978  | -1.11586 |
| C  | -1.98221 | 1.02538  | -0.94876 |
| C  | -3.24752 | 0.31760  | -0.45203 |
| O  | -3.54921 | -0.76430 | -1.31589 |
| C  | -3.28127 | -0.17705 | 1.01538  |
| O  | -4.43663 | -0.96593 | 1.19518  |
| C  | -2.01063 | -0.91772 | 1.44261  |
| N  | -2.01623 | -2.25015 | 1.26362  |
| O  | -1.05110 | -0.29042 | 1.88969  |
| C  | -1.39982 | 2.14668  | -0.05223 |
| C  | -1.53434 | 3.53878  | -0.62942 |
| O  | 0.00705  | 1.79357  | 0.03758  |
| C  | 2.53010  | 0.59855  | 0.16833  |
| C  | 3.76514  | -0.02077 | 0.22515  |
| Cl | 5.09642  | 0.77751  | 1.03173  |
| C  | 3.96703  | -1.27671 | -0.35258 |
| C  | 2.91619  | -1.91500 | -0.99272 |
| H  | -0.15278 | -1.42442 | -1.66449 |
| H  | -2.24059 | 1.42568  | -1.93978 |
| H  | -4.09039 | 1.01400  | -0.54738 |
| H  | -2.73900 | -1.28489 | -1.46703 |

**2e NMR Conformer 4**

Energy: -910278.6131351

|    |          |          |          |
|----|----------|----------|----------|
| O  | 2.12289  | -2.75057 | -0.29761 |
| C  | 2.79998  | -1.58833 | -0.16028 |
| C  | 2.07495  | -0.40180 | 0.03869  |
| C  | 0.60057  | -0.36940 | 0.13804  |
| N  | -0.12553 | 0.58652  | -0.29745 |
| C  | -1.51127 | 0.27130  | 0.07750  |
| C  | -2.39576 | 0.37371  | -1.17046 |
| O  | -2.08145 | -0.63605 | -2.11138 |
| C  | -3.89193 | 0.22714  | -0.89020 |
| O  | -4.21655 | -1.03703 | -0.35153 |
| C  | -4.36644 | 1.31974  | 0.06323  |
| N  | -5.07000 | 0.90291  | 1.12637  |
| O  | -4.09960 | 2.49874  | -0.16858 |
| C  | -1.43175 | -1.13011 | 0.73143  |
| C  | -2.00242 | -1.21043 | 2.13012  |
| O  | -0.00067 | -1.38830 | 0.78196  |
| C  | 2.75781  | 0.81542  | 0.13362  |
| C  | 4.14059  | 0.84568  | 0.04898  |
| Cl | 4.97990  | 2.37380  | 0.18483  |
| C  | 4.86973  | -0.32615 | -0.13657 |
| C  | 4.19567  | -1.53543 | -0.24414 |
| H  | 2.74036  | -3.48598 | -0.46536 |
| H  | -1.85489 | 1.02656  | 0.80093  |
| H  | -2.23831 | 1.37119  | -1.60029 |
| H  | -1.16200 | -0.51544 | -2.40593 |
| H  | -4.42300 | 0.39096  | -1.83965 |
| H  | -4.04318 | -1.71707 | -1.02515 |
| H  | -5.29092 | -0.07791 | 1.24366  |
| H  | -5.43897 | 1.58678  | 1.77694  |
| H  | -1.85983 | -1.89708 | 0.08137  |
| H  | -3.07924 | -1.02766 | 2.08871  |
| H  | -1.83133 | -2.19848 | 2.56442  |
| H  | -1.53915 | -0.45566 | 2.77303  |
| H  | 2.18883  | 1.72835  | 0.28103  |
| H  | 5.95360  | -0.29521 | -0.19942 |

H 4.75307 -2.45617 -0.40165

**2e NMR Conformer 3**

Energy: -910278.0638698

O 0.93549 -1.24238 2.28509  
C 1.81041 -0.78236 1.36662  
C 1.46329 0.11817 0.34442  
C 0.11070 0.70289 0.25462  
N -0.58818 0.79361 -0.80652  
C -1.84708 1.44538 -0.42379  
C -3.03582 0.62404 -0.94124  
O -2.83716 0.34835 -2.31599  
C -3.39580 -0.69659 -0.20620  
O -4.31119 -1.41697 -0.99833  
C -2.18486 -1.54992 0.17222  
N -1.81426 -2.49138 -0.69813  
O -1.60309 -1.33465 1.24398  
C -1.73721 1.67262 1.10534  
C -1.85040 3.12405 1.52159  
O -0.40042 1.19131 1.40435  
C 2.41375 0.49353 -0.61143  
C 3.70866 0.01060 -0.51906  
Cl 4.89715 0.49561 -1.70736  
C 4.07900 -0.84976 0.51391  
C 3.12915 -1.24591 1.44480  
H 0.00987 -1.17108 1.96932  
H -1.90711 2.40914 -0.94887  
H -3.94081 1.24162 -0.88619  
H -1.90437 0.09524 -2.44690  
H -3.88459 -0.44996 0.74295  
H -4.17661 -1.15930 -1.92836  
H -1.02731 -3.09384 -0.48071  
H -2.39231 -2.70674 -1.50187  
H -2.42616 1.04207 1.67538  
H -2.85439 3.49328 1.29080  
H -1.67753 3.23598 2.59426  
H -1.12130 3.73211 0.97787  
H 2.12895 1.17852 -1.40501  
H 5.09935 -1.21630 0.58022  
H 3.38808 -1.93746 2.24110

**2e NMR Conformer 2**

Energy: -910281.8465346

O 2.27098 2.85291 0.20035  
C 2.81040 1.62012 0.08754  
C 2.07477 0.43066 -0.07131  
C 0.60285 0.39220 -0.13305  
N -0.11754 -0.65803 -0.12843  
C -1.51795 -0.22490 -0.22577

C -2.31508 -0.88429 0.90599  
O -1.89881 -0.40784 2.17130  
C -3.82198 -0.63060 0.83915  
O -4.14400 0.73978 0.95365  
C -4.39937 -1.17947 -0.46278  
N -5.18233 -0.33885 -1.15523  
O -4.13905 -2.32939 -0.81564  
C -1.46431 1.32216 -0.18713  
C -2.12057 2.01011 -1.36255  
O -0.03012 1.59065 -0.21298  
C 2.75658 -0.79285 -0.16684  
C 4.13537 -0.82744 -0.10639  
Cl 4.96951 -2.35934 -0.23214  
C 4.87519 0.34727 0.05085  
C 4.21018 1.55723 0.14639  
H 1.30154 2.81800 0.12279  
H -1.92495 -0.58107 -1.18420  
H -2.16043 -1.96757 0.82436  
H -0.97421 -0.67232 2.31907  
H -4.28815 -1.20647 1.65229  
H -3.94545 1.03415 1.85922  
H -5.62292 -0.66085 -2.00928  
H -5.39419 0.58212 -0.79246  
H -1.82893 1.71109 0.76570  
H -3.19392 1.80475 -1.33925  
H -1.97065 3.09146 -1.31721  
H -1.70756 1.63214 -2.30266  
H 2.17901 -1.70382 -0.29029  
H 5.95977 0.30989 0.09611  
H 4.76009 2.48545 0.26980

**2e NMR Conformer 1**

Energy: -910286.5401736

O -1.54798 2.69731 -0.34859  
C -2.42991 1.69191 -0.23525  
C -2.03636 0.34131 -0.12953  
C -0.61215 0.00516 -0.14450  
N 0.33050 0.87068 -0.24218  
C 1.60368 0.14106 -0.24034  
C 2.51319 0.71873 0.85129  
O 2.00005 0.45488 2.14250  
C 3.93050 0.14336 0.83666  
O 3.94629 -1.24974 1.06739  
C 4.61309 0.44444 -0.49504  
N 5.18431 -0.60220 -1.10876  
O 4.61409 1.59174 -0.94045  
C 1.18989 -1.34074 -0.04829  
C 1.66230 -2.27114 -1.14260  
O -0.26923 -1.28762 -0.05905

|    |          |          |          |   |          |          |          |
|----|----------|----------|----------|---|----------|----------|----------|
| C  | -3.00229 | -0.66695 | -0.01328 | H | -1.20226 | -1.66022 | 0.37301  |
| C  | -4.34273 | -0.32734 | -0.00296 | H | -2.72532 | -3.07699 | -0.87099 |
| Cl | -5.55190 | -1.58308 | 0.14250  | H | -4.03734 | -2.73632 | -1.98157 |
| C  | -4.74756 | 1.00598  | -0.10642 | H | -1.86495 | 2.73908  | 0.77529  |
| C  | -3.79506 | 2.00636  | -0.22187 | H | -2.80597 | 3.20989  | -1.51604 |
| H  | -0.63011 | 2.31612  | -0.34729 | H | -1.30700 | 4.12263  | -1.24928 |
| H  | 2.09298  | 0.29249  | -1.21395 | H | -1.28694 | 2.64725  | -2.24627 |
| H  | 2.59446  | 1.79856  | 0.67331  | H | 1.33424  | -1.53877 | -0.28613 |
| H  | 1.16680  | 0.94323  | 2.25994  | H | 5.49283  | -0.51004 | 0.07180  |
| H  | 4.50839  | 0.67121  | 1.60938  | H | 4.86583  | 1.89358  | 0.24054  |
| H  | 3.70541  | -1.41846 | 1.99451  |   |          |          |          |
| H  | 5.68158  | -0.45614 | -1.97973 |   |          |          |          |
| H  | 5.18471  | -1.51568 | -0.67248 |   |          |          |          |
| H  | 1.47090  | -1.70596 | 0.94118  |   |          |          |          |
| H  | 2.75449  | -2.31548 | -1.12382 |   |          |          |          |
| H  | 1.26815  | -3.27923 | -0.99425 |   |          |          |          |
| H  | 1.33898  | -1.90280 | -2.12100 |   |          |          |          |
| H  | -2.68904 | -1.70354 | 0.06695  |   |          |          |          |
| H  | -5.80492 | 1.25493  | -0.09651 |   |          |          |          |
| H  | -4.08950 | 3.04833  | -0.30378 |   |          |          |          |

### 3d NMR Conformer 8

Energy: -910285.2429233

|    |          |          |          |
|----|----------|----------|----------|
| O  | 2.54647  | 2.86213  | 0.17125  |
| C  | 2.76195  | 1.53395  | 0.07503  |
| C  | 1.75638  | 0.56006  | -0.07348 |
| C  | 0.32278  | 0.88363  | -0.14085 |
| N  | -0.62214 | 0.05932  | -0.37844 |
| C  | -1.88525 | 0.80052  | -0.26687 |
| C  | -2.68255 | 0.29911  | 0.94810  |
| O  | -1.98637 | 0.55725  | 2.14798  |
| C  | -3.03973 | -1.19349 | 0.84848  |
| O  | -1.90483 | -2.02899 | 0.94388  |
| C  | -3.88409 | -1.45423 | -0.40142 |
| N  | -3.49277 | -2.48556 | -1.16433 |
| O  | -4.85417 | -0.73810 | -0.65240 |
| C  | -1.46059 | 2.28071  | -0.13130 |
| C  | -1.72651 | 3.12038  | -1.36258 |
| O  | -0.02204 | 2.17686  | 0.07044  |
| C  | 2.11639  | -0.79421 | -0.17056 |
| C  | 3.44418  | -1.16617 | -0.11831 |
| Cl | 3.87599  | -2.85568 | -0.23806 |
| C  | 4.45040  | -0.20751 | 0.03064  |
| C  | 4.10393  | 1.12845  | 0.12550  |
| H  | 1.59681  | 3.07068  | 0.14386  |
| H  | -2.48535 | 0.64606  | -1.17316 |
| H  | -3.61733 | 0.86748  | 0.99506  |
| H  | -1.26297 | -0.08822 | 2.23936  |
| H  | -3.67792 | -1.43656 | 1.70738  |

### 3d NMR Conformer 7

Energy: -910285.9607376

|    |          |          |          |
|----|----------|----------|----------|
| O  | 0.47679  | -2.18586 | -0.65342 |
| C  | 1.60746  | -1.51951 | -0.37361 |
| C  | 1.63956  | -0.12630 | -0.14709 |
| C  | 0.39493  | 0.63585  | -0.22286 |
| N  | -0.75028 | 0.10545  | -0.45467 |
| C  | -1.74097 | 1.18131  | -0.47734 |
| C  | -2.84612 | 0.91834  | 0.54883  |
| O  | -2.30475 | 0.56795  | 1.80715  |
| C  | -3.90282 | -0.11911 | 0.11120  |
| O  | -4.76323 | -0.39103 | 1.19460  |
| C  | -3.27857 | -1.39861 | -0.45475 |
| N  | -3.05963 | -2.38311 | 0.43755  |
| O  | -2.97009 | -1.47003 | -1.64212 |
| C  | -0.92081 | 2.45500  | -0.14380 |
| C  | -0.99962 | 3.54365  | -1.19053 |
| O  | 0.44716  | 1.96590  | -0.05655 |
| C  | 2.85112  | 0.51615  | 0.13979  |
| C  | 4.01595  | -0.22586 | 0.20104  |
| Cl | 5.53076  | 0.57018  | 0.56222  |
| C  | 4.00116  | -1.60568 | -0.02085 |
| C  | 2.80486  | -2.24448 | -0.30655 |
| H  | -0.27875 | -1.53794 | -0.67506 |
| H  | -2.19089 | 1.24272  | -1.47775 |
| H  | -3.39350 | 1.85552  | 0.71622  |
| H  | -1.66192 | -0.15695 | 1.68972  |
| H  | -4.49213 | 0.31258  | -0.70572 |
| H  | -4.29542 | -0.18414 | 2.02346  |
| H  | -3.49594 | -2.34757 | 1.35084  |
| H  | -2.69567 | -3.27094 | 0.10923  |
| H  | -1.17401 | 2.83528  | 0.85222  |
| H  | -2.02899 | 3.90891  | -1.25821 |
| H  | -0.35040 | 4.38282  | -0.93135 |
| H  | -0.70369 | 3.15061  | -2.16761 |
| H  | 2.86311  | 1.58852  | 0.31045  |
| H  | 4.92594  | -2.17333 | 0.03052  |
| H  | 2.77459  | -3.31545 | -0.48309 |

**3d NMR Conformer 6**

Energy: -910278.7782392

|    |          |          |          |
|----|----------|----------|----------|
| O  | -2.15196 | 2.60263  | -1.01327 |
| C  | -2.82949 | 1.49505  | -0.63740 |
| C  | -2.11816 | 0.42672  | -0.06625 |
| C  | -0.65997 | 0.46762  | 0.17207  |
| N  | 0.10712  | -0.55073 | 0.10760  |
| C  | 1.46443  | -0.07836 | 0.42323  |
| C  | 2.32382  | -0.29832 | -0.82345 |
| O  | 2.36823  | -1.67436 | -1.15696 |
| C  | 3.78853  | 0.14619  | -0.74957 |
| O  | 4.41276  | -0.09441 | -1.99320 |
| C  | 4.53960  | -0.50703 | 0.41624  |
| N  | 5.57644  | -1.28971 | 0.08466  |
| O  | 4.19087  | -0.28125 | 1.57588  |
| C  | 1.27961  | 1.40336  | 0.82374  |
| C  | 1.53521  | 1.67439  | 2.29146  |
| O  | -0.11989 | 1.65317  | 0.52414  |
| C  | -2.79803 | -0.74603 | 0.27987  |
| C  | -4.16499 | -0.84357 | 0.07612  |
| Cl | -5.00112 | -2.31209 | 0.52638  |
| C  | -4.88169 | 0.21457  | -0.47734 |
| C  | -4.20986 | 1.37607  | -0.83424 |
| H  | -2.75696 | 3.25067  | -1.41843 |
| H  | 1.87649  | -0.66677 | 1.24810  |
| H  | 1.87136  | 0.27670  | -1.64924 |
| H  | 1.45633  | -1.98919 | -1.28320 |
| H  | 3.83035  | 1.22646  | -0.56539 |
| H  | 4.02863  | -0.90456 | -2.37462 |
| H  | 6.13574  | -1.71069 | 0.81719  |
| H  | 5.86865  | -1.37114 | -0.88045 |
| H  | 1.85522  | 2.08662  | 0.18892  |
| H  | 2.58459  | 1.46361  | 2.51342  |
| H  | 1.30793  | 2.71319  | 2.54206  |
| H  | 0.91048  | 1.01654  | 2.90445  |
| H  | -2.23962 | -1.56971 | 0.71422  |
| H  | -5.95359 | 0.13149  | -0.63148 |
| H  | -4.75556 | 2.20509  | -1.27940 |

**3d NMR Conformer 5**

Energy: -910278.3188646

|   |          |          |          |
|---|----------|----------|----------|
| O | -1.80537 | 2.66886  | -0.92423 |
| C | -2.58417 | 1.62431  | -0.56647 |
| C | -1.97939 | 0.46571  | -0.05028 |
| C | -0.52240 | 0.32724  | 0.14985  |
| N | 0.09667  | -0.79123 | 0.13029  |
| C | 1.51982  | -0.49166 | 0.34542  |
| C | 2.26848  | -0.77964 | -0.96948 |

|    |          |          |          |
|----|----------|----------|----------|
| O  | 1.84783  | -2.01540 | -1.51670 |
| C  | 3.78497  | -0.94829 | -0.79209 |
| O  | 4.07561  | -2.02645 | 0.06799  |
| C  | 4.42240  | 0.32481  | -0.25391 |
| N  | 4.90109  | 0.25386  | 0.99757  |
| O  | 4.43800  | 1.34404  | -0.94393 |
| C  | 1.52421  | 0.99100  | 0.78510  |
| C  | 1.69159  | 1.17922  | 2.28063  |
| O  | 0.19325  | 1.43959  | 0.40978  |
| C  | -2.77672 | -0.63690 | 0.28065  |
| C  | -4.14990 | -0.57955 | 0.11464  |
| Cl | -5.12947 | -1.96301 | 0.54374  |
| C  | -4.76062 | 0.56789  | -0.38667 |
| C  | -3.97481 | 1.65981  | -0.72630 |
| H  | -2.34918 | 3.38774  | -1.29531 |
| H  | 1.91808  | -1.14457 | 1.13242  |
| H  | 2.08334  | 0.04411  | -1.67635 |
| H  | 0.88672  | -2.09274 | -1.38548 |
| H  | 4.21304  | -1.11482 | -1.79081 |
| H  | 3.54808  | -2.79114 | -0.22345 |
| H  | 5.36695  | 1.06061  | 1.39804  |
| H  | 4.91905  | -0.63326 | 1.48640  |
| H  | 2.22862  | 1.60656  | 0.21924  |
| H  | 2.69399  | 0.86393  | 2.58205  |
| H  | 1.55438  | 2.22806  | 2.55346  |
| H  | 0.95535  | 0.57399  | 2.81964  |
| H  | -2.30068 | -1.52970 | 0.67407  |
| H  | -5.83870 | 0.60716  | -0.51281 |
| H  | -4.43760 | 2.55788  | -1.12958 |

**3d NMR Conformer 4**

Energy: -910281.9093796

|   |          |          |          |
|---|----------|----------|----------|
| O | 2.45736  | 2.76430  | 0.77934  |
| C | 2.91459  | 1.53274  | 0.46725  |
| C | 2.11121  | 0.45587  | 0.04711  |
| C | 0.64874  | 0.54579  | -0.10416 |
| N | -0.11559 | -0.36172 | -0.56711 |
| C | -1.49397 | 0.14433  | -0.46447 |
| C | -2.22003 | -0.72255 | 0.56840  |
| O | -2.26780 | -2.06850 | 0.12928  |
| C | -3.67338 | -0.35200 | 0.89021  |
| O | -4.18874 | -1.26232 | 1.83678  |
| C | -4.54391 | -0.25617 | -0.36726 |
| N | -5.55827 | -1.12786 | -0.45269 |
| O | -4.29894 | 0.60324  | -1.21555 |
| C | -1.33866 | 1.63013  | -0.07379 |
| C | -1.60676 | 2.58934  | -1.21367 |
| O | 0.06852  | 1.70824  | 0.29954  |
| C | 2.71353  | -0.77634 | -0.25357 |

|    |          |          |          |
|----|----------|----------|----------|
| C  | 4.08023  | -0.92982 | -0.13664 |
| Cl | 4.81378  | -2.47219 | -0.51181 |
| C  | 4.88691  | 0.13200  | 0.28082  |
| C  | 4.30088  | 1.34981  | 0.57809  |
| H  | 1.48978  | 2.81209  | 0.68915  |
| H  | -1.99525 | 0.04112  | -1.43044 |
| H  | -1.66708 | -0.65390 | 1.52037  |
| H  | -1.35760 | -2.38704 | 0.00066  |
| H  | -3.69886 | 0.64477  | 1.34594  |
| H  | -3.78963 | -2.13501 | 1.66837  |
| H  | -6.19162 | -1.07875 | -1.24220 |
| H  | -5.76077 | -1.75455 | 0.31548  |
| H  | -1.90425 | 1.90177  | 0.82267  |
| H  | -2.65987 | 2.51302  | -1.49500 |
| H  | -1.38008 | 3.61694  | -0.92005 |
| H  | -0.99099 | 2.32202  | -2.07866 |
| H  | 2.08415  | -1.59978 | -0.57679 |
| H  | 5.96140  | 0.00113  | 0.37086  |
| H  | 4.90407  | 2.19190  | 0.90397  |

### 3d NMR Conformer 3

Energy: -910286.4325369

|    |          |          |          |
|----|----------|----------|----------|
| O  | -1.52692 | 2.49632  | -0.97925 |
| C  | -2.42725 | 1.59118  | -0.56382 |
| C  | -2.07143 | 0.27875  | -0.18890 |
| C  | -0.66748 | -0.12893 | -0.24310 |
| N  | 0.29474  | 0.63166  | -0.62043 |
| C  | 1.54131  | -0.13341 | -0.46818 |
| C  | 2.36121  | 0.52423  | 0.64594  |
| O  | 2.71550  | 1.84826  | 0.28733  |
| C  | 3.68548  | -0.15420 | 1.02066  |
| O  | 4.31247  | 0.58678  | 2.04320  |
| C  | 4.59672  | -0.36841 | -0.19305 |
| N  | 5.77252  | 0.27416  | -0.16994 |
| O  | 4.23533  | -1.11418 | -1.10478 |
| C  | 1.05635  | -1.56798 | -0.15396 |
| C  | 1.20878  | -2.52686 | -1.31549 |
| O  | -0.36230 | -1.38301 | 0.12906  |
| C  | -3.05595 | -0.62478 | 0.23267  |
| C  | -4.37677 | -0.21860 | 0.28076  |
| Cl | -5.60818 | -1.34443 | 0.80608  |
| C  | -4.74391 | 1.07865  | -0.08622 |
| C  | -3.77326 | 1.97483  | -0.50580 |
| H  | -0.62736 | 2.07707  | -0.97237 |
| H  | 2.11117  | -0.10142 | -1.40022 |
| H  | 1.74814  | 0.53088  | 1.56247  |
| H  | 1.90759  | 2.38369  | 0.20458  |
| H  | 3.48002  | -1.15476 | 1.41862  |
| H  | 4.11846  | 1.53025  | 1.89606  |

|   |          |          |          |
|---|----------|----------|----------|
| H | 6.05025  | 0.80491  | 0.64556  |
| H | 6.43230  | 0.13172  | -0.92583 |
| H | 1.49572  | -1.97512 | 0.76186  |
| H | 2.27287  | -2.65562 | -1.52801 |
| H | 0.76159  | -3.49523 | -1.07994 |
| H | 0.71940  | -2.11619 | -2.20474 |
| H | -2.77230 | -1.63351 | 0.51719  |
| H | -5.78643 | 1.38078  | -0.04304 |
| H | -4.03861 | 2.98682  | -0.79661 |

### 3d NMR Conformer 2

Energy: -910281.6744275

|    |          |          |          |
|----|----------|----------|----------|
| O  | -2.00071 | 2.88089  | -0.51868 |
| C  | -2.62404 | 1.69875  | -0.33002 |
| C  | -1.98269 | 0.48995  | 0.00007  |
| C  | -0.52779 | 0.36956  | 0.18742  |
| N  | 0.09932  | -0.68474 | 0.53440  |
| C  | 1.53348  | -0.35789 | 0.52137  |
| C  | 2.18754  | -1.12366 | -0.64383 |
| O  | 1.75940  | -2.47187 | -0.64857 |
| C  | 3.71640  | -1.22301 | -0.53295 |
| O  | 4.09408  | -1.88449 | 0.65245  |
| C  | 4.36761  | 0.15185  | -0.58341 |
| N  | 4.96073  | 0.55859  | 0.54928  |
| O  | 4.29234  | 0.83041  | -1.60761 |
| C  | 1.57148  | 1.18303  | 0.38965  |
| C  | 1.84440  | 1.90138  | 1.69580  |
| O  | 0.21057  | 1.48807  | -0.03366 |
| C  | -2.75050 | -0.67357 | 0.17155  |
| C  | -4.12104 | -0.63143 | 0.01672  |
| Cl | -5.06233 | -2.08883 | 0.23271  |
| C  | -4.76802 | 0.56307  | -0.31197 |
| C  | -4.01858 | 1.71343  | -0.48235 |
| H  | -1.03947 | 2.79707  | -0.39563 |
| H  | 1.99019  | -0.68740 | 1.46280  |
| H  | 1.93050  | -0.62622 | -1.59199 |
| H  | 0.80754  | -2.49286 | -0.44925 |
| H  | 4.06979  | -1.76882 | -1.41938 |
| H  | 3.58999  | -2.71552 | 0.70687  |
| H  | 5.04980  | -0.07650 | 1.33367  |
| H  | 5.44415  | 1.44994  | 0.56434  |
| H  | 2.22354  | 1.53328  | -0.41408 |
| H  | 2.86661  | 1.69125  | 2.02115  |
| H  | 1.72912  | 2.98078  | 1.57377  |
| H  | 1.15080  | 1.55410  | 2.46833  |
| H  | -2.24525 | -1.59983 | 0.42734  |
| H  | -5.84731 | 0.58610  | -0.43204 |
| H  | -4.49565 | 2.65496  | -0.73743 |

**3d NMR Conformer 1**

Energy: -910285.9174081

|    |          |          |          |
|----|----------|----------|----------|
| O  | 1.70198  | 2.70761  | 0.50047  |
| C  | 2.48649  | 1.64420  | 0.26237  |
| C  | 1.98187  | 0.33220  | 0.14982  |
| C  | 0.54546  | 0.09557  | 0.28795  |
| N  | -0.32782 | 1.01242  | 0.50276  |
| C  | -1.64882 | 0.36678  | 0.49754  |
| C  | -2.41133 | 0.82304  | -0.75968 |
| O  | -2.35429 | 2.23063  | -0.88996 |
| C  | -3.91669 | 0.52327  | -0.70517 |
| O  | -4.51738 | 1.14203  | 0.40915  |
| C  | -4.18938 | -0.97425 | -0.66765 |
| N  | -4.73687 | -1.44036 | 0.46493  |
| O  | -3.87447 | -1.67959 | -1.62587 |
| C  | -1.30747 | -1.14336 | 0.54266  |
| C  | -1.46592 | -1.75881 | 1.91864  |
| O  | 0.10476  | -1.16802 | 0.18368  |
| C  | 2.85258  | -0.73892 | -0.09316 |
| C  | 4.20731  | -0.49828 | -0.22641 |
| Cl | 5.29534  | -1.83265 | -0.53271 |
| C  | 4.72111  | 0.79682  | -0.11926 |
| C  | 3.86392  | 1.85835  | 0.12435  |
| H  | 0.76344  | 2.40264  | 0.58086  |
| H  | -2.21243 | 0.67641  | 1.38576  |
| H  | -1.98164 | 0.32701  | -1.64372 |
| H  | -1.43325 | 2.52128  | -0.77700 |
| H  | -4.35096 | 0.89393  | -1.64460 |
| H  | -4.27818 | 2.08569  | 0.39919  |
| H  | -5.03724 | -0.79793 | 1.18843  |
| H  | -4.97483 | -2.42381 | 0.53335  |
| H  | -1.82320 | -1.72476 | -0.22511 |
| H  | -2.52327 | -1.76870 | 2.19619  |
| H  | -1.08990 | -2.78426 | 1.92627  |
| H  | -0.91315 | -1.17200 | 2.65946  |
| H  | 2.45483  | -1.74582 | -0.17543 |
| H  | 5.78847  | 0.96827  | -0.22586 |
| H  | 4.24390  | 2.87170  | 0.21276  |

**2c NMR Conformer 12**

Energy: -910282.6158925

|   |          |          |          |
|---|----------|----------|----------|
| O | 2.50636  | 2.89227  | -0.18065 |
| C | 2.75235  | 1.56684  | -0.13103 |
| C | 1.77268  | 0.55963  | -0.21835 |
| C | 0.33782  | 0.84207  | -0.37733 |
| N | -0.57949 | -0.02368 | -0.57788 |
| C | -1.86298 | 0.69488  | -0.52862 |
| C | -2.59411 | 0.31722  | 0.77289  |
| O | -1.82546 | 0.64440  | 1.91135  |

|    |          |          |          |
|----|----------|----------|----------|
| C  | -2.98068 | -1.17186 | 0.80862  |
| O  | -1.85589 | -2.02225 | 0.89160  |
| C  | -3.90938 | -1.50928 | -0.36007 |
| N  | -3.57824 | -2.59731 | -1.07091 |
| O  | -4.88728 | -0.79928 | -0.59788 |
| C  | -1.45589 | 2.18107  | -0.65411 |
| C  | -2.17386 | 3.20136  | 0.19998  |
| O  | -0.04388 | 2.13972  | -0.29312 |
| C  | 2.16206  | -0.78860 | -0.15880 |
| C  | 3.49340  | -1.12215 | -0.01589 |
| Cl | 3.96153  | -2.80453 | 0.06105  |
| C  | 4.47408  | -0.13005 | 0.07179  |
| C  | 4.09865  | 1.20024  | 0.01368  |
| H  | 1.55426  | 3.07198  | -0.26827 |
| H  | -2.49082 | 0.40486  | -1.37859 |
| H  | -3.51928 | 0.89880  | 0.83345  |
| H  | -1.11650 | -0.01480 | 2.01484  |
| H  | -3.56404 | -1.33613 | 1.72346  |
| H  | -1.17036 | -1.69343 | 0.27693  |
| H  | -4.17706 | -2.89813 | -1.83129 |
| H  | -2.79710 | -3.17505 | -0.78653 |
| H  | -1.48367 | 2.47484  | -1.71003 |
| H  | -3.22838 | 3.23895  | -0.08910 |
| H  | -2.09935 | 2.94328  | 1.25762  |
| H  | -1.74469 | 4.19257  | 0.03618  |
| H  | 1.39954  | -1.55901 | -0.22607 |
| H  | 5.51945  | -0.40247 | 0.18521  |
| H  | 4.84040  | 1.99063  | 0.07879  |

**2c NMR Conformer 11**

Energy: -910282.8631250

|   |          |          |          |
|---|----------|----------|----------|
| O | -0.49098 | -2.22616 | -0.19488 |
| C | -1.64027 | -1.53360 | -0.15364 |
| C | -1.68720 | -0.14352 | 0.08625  |
| C | -0.44149 | 0.58131  | 0.32636  |
| N | 0.72260  | 0.04503  | 0.27476  |
| C | 1.68369  | 1.06956  | 0.70027  |
| C | 2.94988  | 1.00587  | -0.15595 |
| O | 2.66182  | 0.84500  | -1.53050 |
| C | 3.94081  | -0.09269 | 0.29986  |
| O | 4.97258  | -0.20836 | -0.65221 |
| C | 3.25219  | -1.43622 | 0.56433  |
| N | 3.19865  | -2.28229 | -0.48229 |
| O | 2.75228  | -1.67544 | 1.66152  |
| C | 0.86082  | 2.38373  | 0.63297  |
| C | 1.02778  | 3.24838  | -0.60274 |
| O | -0.51108 | 1.88319  | 0.65098  |
| C | -2.91720 | 0.52665  | 0.12191  |
| C | -4.08479 | -0.18464 | -0.08294 |

|    |          |          |          |   |          |          |          |
|----|----------|----------|----------|---|----------|----------|----------|
| Cl | -5.62327 | 0.64593  | -0.03604 | H | -3.17089 | -2.40476 | -0.94045 |
| C  | -4.05481 | -1.56122 | -0.32220 | H | -0.97158 | 2.50589  | -1.74038 |
| C  | -2.84016 | -2.22798 | -0.35623 | H | -2.42151 | 3.70058  | -0.09389 |
| H  | 0.26295  | -1.60363 | -0.01781 | H | -1.38126 | 3.12483  | 1.23406  |
| H  | 1.96618  | 0.86119  | 1.74081  | H | -0.73828 | 4.23539  | -0.00153 |
| H  | 3.49709  | 1.95297  | -0.07404 | H | 2.85510  | 1.61268  | -0.33270 |
| H  | 1.97908  | 0.15534  | -1.63280 | H | 5.05798  | -2.03094 | 0.26870  |
| H  | 4.37934  | 0.21149  | 1.25680  | H | 2.93089  | -3.32334 | 0.22660  |
| H  | 4.63117  | 0.09424  | -1.51285 |   |          |          |          |
| H  | 2.80714  | -3.20774 | -0.34480 |   |          |          |          |
| H  | 3.77489  | -2.11897 | -1.29897 |   |          |          |          |
| H  | 0.98577  | 2.97277  | 1.54401  |   |          |          |          |
| H  | 2.04187  | 3.65432  | -0.65181 |   |          |          |          |
| H  | 0.84376  | 2.67171  | -1.51157 |   |          |          |          |
| H  | 0.32551  | 4.08374  | -0.55540 |   |          |          |          |
| H  | -2.94065 | 1.59555  | 0.31184  |   |          |          |          |
| H  | -4.98210 | -2.10504 | -0.47866 |   |          |          |          |
| H  | -2.79773 | -3.29766 | -0.53799 |   |          |          |          |

**2c** NMR Conformer 10

Energy: -910283.9806001

|    |          |          |          |
|----|----------|----------|----------|
| O  | 0.58069  | -2.34020 | -0.09146 |
| C  | 1.69748  | -1.59643 | -0.08477 |
| C  | 1.68372  | -0.19379 | -0.24546 |
| C  | 0.40133  | 0.48733  | -0.41861 |
| N  | -0.71086 | -0.12558 | -0.59844 |
| C  | -1.77096 | 0.88409  | -0.53958 |
| C  | -2.55632 | 0.72473  | 0.77452  |
| O  | -1.70644 | 0.81300  | 1.89509  |
| C  | -3.36515 | -0.58707 | 0.85076  |
| O  | -2.47202 | -1.66924 | 1.03436  |
| C  | -4.22921 | -0.74169 | -0.39874 |
| N  | -3.93007 | -1.78233 | -1.18856 |
| O  | -5.11288 | 0.08257  | -0.63702 |
| C  | -0.99057 | 2.21702  | -0.68269 |
| C  | -1.40755 | 3.39032  | 0.17571  |
| O  | 0.37471  | 1.82936  | -0.35256 |
| C  | 2.88004  | 0.53358  | -0.21308 |
| C  | 4.07740  | -0.13434 | -0.03136 |
| Cl | 5.57504  | 0.76964  | 0.00627  |
| C  | 4.10882  | -1.52217 | 0.12614  |
| C  | 2.92579  | -2.24469 | 0.10159  |
| H  | -0.20321 | -1.74371 | -0.24241 |
| H  | -2.46119 | 0.76512  | -1.38179 |
| H  | -3.27330 | 1.54973  | 0.84502  |
| H  | -1.21011 | -0.02348 | 1.95154  |
| H  | -4.04682 | -0.49851 | 1.70568  |
| H  | -2.84737 | -2.29471 | 1.67678  |
| H  | -4.44904 | -1.92868 | -2.04661 |

**2c** NMR Conformer 9

Energy: -910276.0839582

|    |          |          |          |
|----|----------|----------|----------|
| O  | -2.39795 | -2.83733 | -0.51627 |
| C  | -2.96888 | -1.62320 | -0.35194 |
| C  | -2.14155 | -0.51007 | -0.12882 |
| C  | -0.67067 | -0.60653 | -0.02842 |
| N  | 0.14138  | 0.31372  | -0.37887 |
| C  | 1.48983  | -0.23577 | -0.14618 |
| C  | 2.42087  | 0.88163  | 0.31149  |
| O  | 2.46028  | 1.90177  | -0.67395 |
| C  | 3.89003  | 0.50195  | 0.54268  |
| O  | 4.61836  | 1.65379  | 0.90576  |
| C  | 4.50296  | -0.22332 | -0.66144 |
| N  | 5.49052  | 0.42024  | -1.29908 |
| O  | 4.09220  | -1.34096 | -0.97717 |
| C  | 1.23818  | -1.40924 | 0.81889  |
| C  | 1.30467  | -1.09383 | 2.30540  |
| O  | -0.14751 | -1.73385 | 0.51170  |
| C  | -2.71533 | 0.76027  | -0.00685 |
| C  | -4.08976 | 0.91342  | -0.08708 |
| Cl | -4.79149 | 2.50616  | 0.08407  |
| C  | -4.92003 | -0.18541 | -0.29521 |
| C  | -4.35491 | -1.44611 | -0.43015 |
| H  | -3.07768 | -3.51365 | -0.69116 |
| H  | 1.86264  | -0.61570 | -1.10406 |
| H  | 2.04985  | 1.29865  | 1.26018  |
| H  | 1.55372  | 2.22303  | -0.82065 |
| H  | 3.96071  | -0.20766 | 1.37422  |
| H  | 4.22703  | 2.41946  | 0.44825  |
| H  | 5.96045  | -0.03286 | -2.07413 |
| H  | 5.84569  | 1.29722  | -0.94077 |
| H  | 1.84329  | -2.28129 | 0.56366  |
| H  | 2.32765  | -0.88110 | 2.62599  |
| H  | 0.67520  | -0.23160 | 2.54735  |
| H  | 0.94444  | -1.95480 | 2.87293  |
| H  | -2.06883 | 1.61663  | 0.15955  |
| H  | -5.99694 | -0.05765 | -0.35429 |
| H  | -4.99060 | -2.31124 | -0.60556 |

**2c** NMR Conformer 8



Energy: -910276.3824394

|    |          |          |          |
|----|----------|----------|----------|
| O  | -2.31546 | 2.73187  | -0.25968 |
| C  | -2.93658 | 1.53797  | -0.13483 |
| C  | -2.15101 | 0.39491  | 0.08752  |
| C  | -0.68259 | 0.46579  | 0.21848  |
| N  | 0.13779  | -0.36891 | -0.28935 |
| C  | 1.46578  | 0.01762  | 0.22571  |
| C  | 2.51006  | -0.23672 | -0.85591 |
| O  | 2.49173  | -1.60873 | -1.21784 |
| C  | 3.97319  | 0.05192  | -0.49341 |
| O  | 4.79983  | -0.30896 | -1.57788 |
| C  | 4.39786  | -0.62225 | 0.81667  |
| N  | 5.34868  | -1.56162 | 0.71647  |
| O  | 3.88233  | -0.27405 | 1.87990  |
| C  | 1.25597  | 1.46619  | 0.70866  |
| C  | 1.51919  | 2.56935  | -0.30442 |
| O  | -0.17433 | 1.46465  | 0.97828  |
| C  | -2.76040 | -0.86083 | 0.16074  |
| C  | -4.13677 | -0.97052 | 0.03418  |
| Cl | -4.89014 | -2.54512 | 0.13880  |
| C  | -4.92662 | 0.15767  | -0.17126 |
| C  | -4.32314 | 1.40600  | -0.25903 |
| H  | -2.96277 | 3.43576  | -0.44857 |
| H  | 1.69440  | -0.63016 | 1.07981  |
| H  | 2.27640  | 0.38060  | -1.73676 |
| H  | 1.59498  | -1.83490 | -1.51968 |
| H  | 4.10476  | 1.12593  | -0.32210 |
| H  | 4.39823  | -1.07638 | -2.02340 |
| H  | 5.69851  | -2.00712 | 1.55668  |
| H  | 5.79694  | -1.74405 | -0.17201 |
| H  | 1.76709  | 1.65455  | 1.65449  |
| H  | 2.58492  | 2.66353  | -0.52817 |
| H  | 0.97786  | 2.37634  | -1.23580 |
| H  | 1.17060  | 3.52097  | 0.10283  |
| H  | -2.14391 | -1.73993 | 0.32412  |
| H  | -6.00434 | 0.06266  | -0.26704 |
| H  | -4.92899 | 2.29214  | -0.43468 |

### 3c NMR Conformer 7

Energy: -910275.0332187

|   |          |          |          |
|---|----------|----------|----------|
| O | -2.13551 | -2.88017 | -0.61517 |
| C | -2.77623 | -1.71426 | -0.38154 |
| C | -2.02818 | -0.54486 | -0.15907 |
| C | -0.55190 | -0.50042 | -0.14009 |
| N | 0.13477  | 0.57151  | -0.25782 |
| C | 1.54525  | 0.15344  | -0.26104 |
| C | 2.42304  | 1.21391  | 0.42037  |
| O | 1.95589  | 2.51265  | 0.10208  |
| C | 3.87369  | 1.20163  | -0.09720 |

|    |          |          |          |
|----|----------|----------|----------|
| O  | 3.91788  | 1.55404  | -1.46019 |
| C  | 4.50678  | -0.16895 | 0.09641  |
| N  | 4.72818  | -0.87373 | -1.02364 |
| O  | 4.74607  | -0.58093 | 1.23170  |
| C  | 1.49225  | -1.25829 | 0.36530  |
| C  | 1.63458  | -1.34305 | 1.87570  |
| O  | 0.12809  | -1.65459 | 0.03459  |
| C  | -2.70059 | 0.66760  | 0.04783  |
| C  | -4.08293 | 0.71120  | 0.04713  |
| Cl | -4.89869 | 2.23427  | 0.31716  |
| C  | -4.83357 | -0.44413 | -0.16427 |
| C  | -4.17599 | -1.64559 | -0.37936 |
| H  | -2.77988 | -3.59442 | -0.77323 |
| H  | 1.85992  | 0.08057  | -1.31351 |
| H  | 2.43356  | 1.07091  | 1.50796  |
| H  | 0.98479  | 2.47870  | 0.05021  |
| H  | 4.45187  | 1.90995  | 0.51241  |
| H  | 3.33681  | 2.32522  | -1.58422 |
| H  | 4.56074  | -0.45516 | -1.93051 |
| H  | 5.16393  | -1.78671 | -0.95969 |
| H  | 2.15801  | -1.96215 | -0.13900 |
| H  | 2.66013  | -1.12321 | 2.17953  |
| H  | 0.95242  | -0.64171 | 2.36789  |
| H  | 1.38203  | -2.35580 | 2.19866  |
| H  | -2.11684 | 1.56755  | 0.21357  |
| H  | -5.91896 | -0.40410 | -0.16276 |
| H  | -4.74812 | -2.55418 | -0.55401 |

### 3c NMR Conformer 6

Energy: -910275.3522132

|    |          |          |          |
|----|----------|----------|----------|
| O  | -2.03060 | 2.81103  | -0.27358 |
| C  | -2.73560 | 1.66948  | -0.11087 |
| C  | -2.03712 | 0.46290  | 0.06517  |
| C  | -0.56436 | 0.39710  | 0.11562  |
| N  | 0.13938  | -0.55104 | -0.37142 |
| C  | 1.52181  | -0.28845 | 0.06815  |
| C  | 2.52590  | -0.75371 | -0.99574 |
| O  | 2.08429  | -1.95989 | -1.59260 |
| C  | 3.89776  | -1.11432 | -0.39540 |
| O  | 3.78760  | -2.21351 | 0.47898  |
| C  | 4.49229  | 0.07227  | 0.34979  |
| N  | 4.54779  | -0.04521 | 1.68520  |
| O  | 4.85002  | 1.07263  | -0.27234 |
| C  | 1.49206  | 1.21390  | 0.43194  |
| C  | 1.80328  | 2.19537  | -0.68543 |
| O  | 0.08553  | 1.37871  | 0.77774  |
| C  | -2.74672 | -0.73695 | 0.18180  |
| C  | -4.13178 | -0.73111 | 0.14117  |
| Cl | -5.00611 | -2.23671 | 0.30161  |

|   |          |          |          |   |          |          |          |
|---|----------|----------|----------|---|----------|----------|----------|
| C | -4.83491 | 0.46035  | -0.01917 | H | 1.17521  | -1.99748 | -1.38890 |
| C | -4.13422 | 1.65236  | -0.14807 | H | 2.57022  | -2.74377 | 0.46387  |
| H | -2.63145 | 3.56265  | -0.42986 | H | 1.48051  | -1.99082 | 1.66685  |
| H | 1.69066  | -0.88587 | 0.97744  | H | 0.92820  | -3.36160 | 0.68898  |
| H | 2.66741  | 0.01891  | -1.76174 | H | -2.82803 | -1.70912 | 0.02993  |
| H | 1.11538  | -1.92089 | -1.67171 | H | -5.82081 | 1.37683  | 0.10391  |
| H | 4.57658  | -1.34073 | -1.22944 | H | -4.04710 | 3.10142  | -0.18311 |
| H | 3.23127  | -2.88318 | 0.04283  |   |          |          |          |
| H | 4.95114  | 0.70488  | 2.23488  |   |          |          |          |
| H | 4.28941  | -0.91707 | 2.13097  |   |          |          |          |
| H | 2.06901  | 1.43446  | 1.33256  |   |          |          |          |
| H | 2.86486  | 2.16714  | -0.93952 |   |          |          |          |
| H | 1.20906  | 1.96667  | -1.57637 |   |          |          |          |
| H | 1.54627  | 3.20325  | -0.35128 |   |          |          |          |
| H | -2.19721 | -1.66444 | 0.31225  |   |          |          |          |
| H | -5.92074 | 0.45794  | -0.04670 |   |          |          |          |
| H | -4.67291 | 2.58706  | -0.28741 |   |          |          |          |

### 3c NMR Conformer 5

Energy: -910282.9111357

|    |          |          |          |
|----|----------|----------|----------|
| O  | -1.53016 | 2.64777  | -0.38855 |
| C  | -2.44505 | 1.67693  | -0.23467 |
| C  | -2.10241 | 0.31030  | -0.17318 |
| C  | -0.69783 | -0.08706 | -0.28131 |
| N  | 0.27886  | 0.73166  | -0.41861 |
| C  | 1.52126  | -0.05658 | -0.46522 |
| C  | 2.43412  | 0.48139  | 0.64794  |
| O  | 2.71028  | 1.84715  | 0.37341  |
| C  | 3.82310  | -0.16539 | 0.81017  |
| O  | 4.61649  | 0.62410  | 1.66576  |
| C  | 4.50032  | -0.44286 | -0.53603 |
| N  | 5.64375  | 0.21469  | -0.77048 |
| O  | 3.99097  | -1.24897 | -1.31713 |
| C  | 1.02893  | -1.53328 | -0.40987 |
| C  | 1.53934  | -2.45583 | 0.67810  |
| O  | -0.41392 | -1.39604 | -0.23277 |
| C  | -3.10134 | -0.65922 | -0.01426 |
| C  | -4.42318 | -0.26537 | 0.08445  |
| Cl | -5.67176 | -1.47421 | 0.28287  |
| C  | -4.77736 | 1.08487  | 0.02573  |
| C  | -3.79226 | 2.04705  | -0.13370 |
| H  | -0.63210 | 2.23094  | -0.44832 |
| H  | 2.02129  | 0.13548  | -1.41746 |
| H  | 1.91893  | 0.39430  | 1.61674  |
| H  | 1.88377  | 2.35652  | 0.42942  |
| H  | 3.71270  | -1.14202 | 1.28740  |
| H  | 4.35304  | 1.55398  | 1.54671  |
| H  | 6.05260  | 0.79784  | -0.05141 |
| H  | 6.15822  | 0.03283  | -1.62446 |

### 3c NMR Conformer 4

Energy: -910279.7764122

|    |          |          |          |
|----|----------|----------|----------|
| O  | 2.56546  | 2.86163  | -0.16323 |
| C  | 2.99336  | 1.58165  | -0.13123 |
| C  | 2.15435  | 0.45136  | -0.11696 |
| C  | 0.68485  | 0.53298  | -0.12551 |
| N  | -0.12649 | -0.44166 | -0.01302 |
| C  | -1.47383 | 0.12688  | -0.20007 |
| C  | -2.46140 | -0.62587 | 0.68619  |
| O  | -2.44904 | -2.00119 | 0.34032  |
| C  | -3.93599 | -0.20983 | 0.58815  |
| O  | -4.71265 | -1.04638 | 1.41564  |
| C  | -4.43989 | -0.18307 | -0.85984 |
| N  | -5.39901 | -1.06624 | -1.16845 |
| O  | -3.97324 | 0.63528  | -1.65386 |
| C  | -1.27514 | 1.63324  | 0.05276  |
| C  | -1.45139 | 2.11765  | 1.48232  |
| O  | 0.13979  | 1.77541  | -0.28158 |
| C  | 2.72636  | -0.83073 | -0.08504 |
| C  | 4.09833  | -0.97987 | -0.06338 |
| Cl | 4.79446  | -2.58363 | -0.02627 |
| C  | 4.94032  | 0.13538  | -0.07507 |
| C  | 4.38422  | 1.40208  | -0.10950 |
| H  | 1.59360  | 2.90554  | -0.18684 |
| H  | -1.76176 | -0.03749 | -1.24456 |
| H  | -2.16818 | -0.50580 | 1.74034  |
| H  | -1.54636 | -2.34312 | 0.46234  |
| H  | -4.05482 | 0.81602  | 0.95394  |
| H  | -4.30504 | -1.93134 | 1.42375  |
| H  | -5.79843 | -1.06266 | -2.09979 |
| H  | -5.80294 | -1.65531 | -0.45177 |
| H  | -1.83693 | 2.24139  | -0.65797 |
| H  | -2.49930 | 2.07535  | 1.78957  |
| H  | -0.85851 | 1.51147  | 2.17433  |
| H  | -1.12010 | 3.15591  | 1.55746  |
| H  | 2.06998  | -1.69553 | -0.07940 |
| H  | 6.01891  | 0.00775  | -0.05952 |
| H  | 5.01502  | 2.28592  | -0.12019 |

### 3c NMR Conformer 3

Energy: -910278.5124450

|    |          |          |          |    |          |          |          |
|----|----------|----------|----------|----|----------|----------|----------|
| O  | 2.16423  | 2.93589  | -0.25344 | C  | 4.44993  | -0.47926 | -0.89422 |
| C  | 2.73500  | 1.71436  | -0.18603 | N  | 5.58529  | 0.14746  | -1.23105 |
| C  | 2.03093  | 0.49647  | -0.12766 | O  | 3.79617  | -1.18420 | -1.66441 |
| C  | 0.56266  | 0.41056  | -0.12549 | C  | 0.99134  | -1.53725 | 0.14151  |
| N  | -0.13231 | -0.64411 | 0.04238  | C  | 1.08679  | -1.97692 | 1.59363  |
| C  | -1.53524 | -0.24858 | -0.16824 | O  | -0.42908 | -1.40988 | -0.17157 |
| C  | -2.47275 | -1.07597 | 0.72339  | C  | -3.12375 | -0.65061 | -0.10305 |
| O  | -2.01545 | -2.41253 | 0.81000  | C  | -4.44588 | -0.24618 | -0.11197 |
| C  | -3.88708 | -1.20247 | 0.12557  | Cl | -5.71685 | -1.44733 | -0.15067 |
| O  | -3.85402 | -1.92818 | -1.08075 | C  | -4.78305 | 1.10964  | -0.09241 |
| C  | -4.49324 | 0.17154  | -0.12325 | C  | -3.78079 | 2.06689  | -0.06317 |
| N  | -4.65249 | 0.51617  | -1.41002 | H  | -0.60383 | 2.23253  | -0.02025 |
| O  | -4.76538 | 0.90424  | 0.82808  | H  | 1.79457  | -0.06347 | -1.24028 |
| C  | -1.50806 | 1.28271  | 0.04012  | H  | 2.35374  | 0.42912  | 1.71687  |
| C  | -1.70791 | 1.78603  | 1.45855  | H  | 2.16577  | 2.33391  | 0.44408  |
| O  | -0.12345 | 1.56839  | -0.33710 | H  | 3.87403  | -1.31806 | 0.94990  |
| C  | 2.74542  | -0.71071 | -0.05858 | H  | 4.75496  | 1.31334  | 1.32584  |
| C  | 4.12538  | -0.70191 | -0.04445 | H  | 6.12703  | 0.63857  | -0.53165 |
| Cl | 5.00031  | -2.21301 | 0.04449  | H  | 5.96242  | 0.02596  | -2.16381 |
| C  | 4.83412  | 0.50123  | -0.10180 | H  | 1.40723  | -2.28189 | -0.53921 |
| C  | 4.13735  | 1.69464  | -0.17238 | H  | 2.12372  | -2.14325 | 1.89559  |
| H  | 1.19374  | 2.86831  | -0.26986 | H  | 0.64490  | -1.22635 | 2.25653  |
| H  | -1.77986 | -0.47352 | -1.21775 | H  | 0.54301  | -2.91546 | 1.72157  |
| H  | -2.54841 | -0.63426 | 1.72466  | H  | -2.86271 | -1.70441 | -0.11915 |
| H  | -1.04315 | -2.40210 | 0.84091  | H  | -5.82703 | 1.40984  | -0.10040 |
| H  | -4.52123 | -1.70299 | 0.87061  | H  | -4.02267 | 3.12534  | -0.04785 |
| H  | -3.29723 | -2.71398 | -0.93897 |    |          |          |          |
| H  | -5.07170 | 1.41081  | -1.63724 |    |          |          |          |
| H  | -4.46003 | -0.15362 | -2.14485 |    |          |          |          |
| H  | -2.14242 | 1.81320  | -0.67278 |    |          |          |          |
| H  | -2.74797 | 1.65863  | 1.76487  |    |          |          |          |
| H  | -1.05569 | 1.24957  | 2.15566  |    |          |          |          |
| H  | -1.46026 | 2.84958  | 1.49799  |    |          |          |          |
| H  | 2.19207  | -1.64396 | -0.01840 |    |          |          |          |
| H  | 5.92024  | 0.49772  | -0.09259 |    |          |          |          |
| H  | 4.66345  | 2.64349  | -0.21788 |    |          |          |          |

### 3c NMR Conformer 2

Energy: -910284.0294580

|   |          |          |          |
|---|----------|----------|----------|
| O | -1.50098 | 2.65239  | -0.02119 |
| C | -2.43305 | 1.68599  | -0.05221 |
| C | -2.10761 | 0.31394  | -0.07394 |
| C | -0.70352 | -0.09337 | -0.07781 |
| N | 0.29418  | 0.71049  | -0.01521 |
| C | 1.50031  | -0.11866 | -0.18650 |
| C | 2.64307  | 0.43959  | 0.65534  |
| O | 2.93334  | 1.76813  | 0.25158  |
| C | 3.98454  | -0.30171 | 0.55654  |
| O | 4.94118  | 0.35740  | 1.35398  |

### 3c NMR Conformer 1

Energy: -910282.3190304

|    |          |          |          |
|----|----------|----------|----------|
| O  | -1.61460 | 2.69650  | 0.07303  |
| C  | -2.46119 | 1.65610  | 0.00662  |
| C  | -2.02348 | 0.31714  | -0.05990 |
| C  | -0.59131 | 0.02398  | -0.07428 |
| N  | 0.33930  | 0.90017  | 0.04392  |
| C  | 1.60941  | 0.18799  | -0.17218 |
| C  | 2.73926  | 0.78095  | 0.68376  |
| O  | 2.62994  | 2.19006  | 0.75148  |
| C  | 4.12583  | 0.55151  | 0.05348  |
| O  | 4.23643  | 1.23011  | -1.17600 |
| C  | 4.38399  | -0.93376 | -0.16038 |
| N  | 4.42352  | -1.34310 | -1.43719 |
| O  | 4.50234  | -1.68181 | 0.81017  |
| C  | 1.21430  | -1.28749 | 0.08350  |
| C  | 1.33440  | -1.79061 | 1.51134  |
| O  | -0.21015 | -1.25501 | -0.24482 |
| C  | -2.95776 | -0.72586 | -0.12503 |
| C  | -4.30854 | -0.43122 | -0.12417 |
| Cl | -5.47658 | -1.73030 | -0.20435 |
| C  | -4.75585 | 0.89107  | -0.06099 |

|   |          |          |          |
|---|----------|----------|----------|
| C | -3.83564 | 1.92547  | 0.00300  |
| H | -0.68612 | 2.35676  | 0.06678  |
| H | 1.87934  | 0.32281  | -1.23043 |
| H | 2.73264  | 0.34924  | 1.69199  |
| H | 1.70546  | 2.42712  | 0.93608  |
| H | 4.87900  | 0.90722  | 0.77024  |
| H | 3.91167  | 2.13875  | -1.04772 |
| H | 4.37354  | -0.66927 | -2.19161 |
| H | 4.61275  | -2.31799 | -1.64105 |
| H | 1.68455  | -1.97087 | -0.62652 |
| H | 2.38311  | -1.91180 | 1.78924  |
| H | 0.85174  | -1.09720 | 2.20824  |
| H | 0.83725  | -2.76048 | 1.58713  |
| H | -2.61135 | -1.75362 | -0.17521 |
| H | -5.82087 | 1.10497  | -0.06208 |
| H | -4.16295 | 2.95962  | 0.05240  |

**2b** NMR Conformer 4

Energy: -910273.8160951

|    |          |          |          |
|----|----------|----------|----------|
| O  | -0.98543 | 2.60042  | -0.06458 |
| C  | -1.87408 | 1.58466  | -0.07509 |
| C  | -1.56970 | 0.26838  | 0.31557  |
| C  | -0.24274 | -0.10363 | 0.83894  |
| N  | 0.33845  | -1.22480 | 0.66648  |
| C  | 1.66660  | -1.10169 | 1.28381  |
| C  | 2.77535  | -1.28216 | 0.22798  |
| O  | 3.02409  | -2.67133 | 0.04890  |
| C  | 2.52650  | -0.70639 | -1.18937 |
| O  | 3.59565  | -1.09788 | -2.02606 |
| C  | 2.43706  | 0.81320  | -1.23198 |
| N  | 3.58134  | 1.45026  | -1.51280 |
| O  | 1.37744  | 1.39378  | -0.98486 |
| C  | 1.58447  | 0.21549  | 2.09782  |
| C  | 2.75073  | 1.17988  | 2.08044  |
| O  | 0.38975  | 0.84430  | 1.57206  |
| C  | -2.54597 | -0.73054 | 0.21700  |
| C  | -3.81651 | -0.41197 | -0.22939 |
| Cl | -5.03391 | -1.66402 | -0.33599 |
| C  | -4.14185 | 0.89641  | -0.58800 |
| C  | -3.17024 | 1.88306  | -0.51384 |
| H  | -0.07236 | 2.26597  | 0.00046  |
| H  | 1.82669  | -1.93144 | 1.98122  |
| H  | 3.71836  | -0.86982 | 0.60872  |
| H  | 2.17812  | -3.12208 | -0.13269 |
| H  | 1.56633  | -1.09209 | -1.55744 |
| H  | 3.79949  | -2.02816 | -1.82776 |
| H  | 3.58336  | 2.46182  | -1.58385 |
| H  | 4.39493  | 0.92234  | -1.80594 |
| H  | 1.34807  | -0.04483 | 3.13632  |

|   |          |          |          |
|---|----------|----------|----------|
| H | 3.62825  | 0.70020  | 2.52414  |
| H | 3.00172  | 1.51190  | 1.07210  |
| H | 2.50774  | 2.05880  | 2.68239  |
| H | -2.29529 | -1.74550 | 0.51118  |
| H | -5.14416 | 1.13648  | -0.93071 |
| H | -3.39303 | 2.90412  | -0.80900 |

**2b** NMR Conformer 3

Energy: -910274.7785503

|    |          |          |          |
|----|----------|----------|----------|
| O  | 2.29664  | 2.72959  | -0.03413 |
| C  | 2.91328  | 1.52728  | -0.04591 |
| C  | 2.12955  | 0.36417  | -0.13645 |
| C  | 0.65786  | 0.39864  | -0.24819 |
| N  | -0.13053 | -0.45829 | 0.27634  |
| C  | -1.47106 | -0.12243 | -0.23689 |
| C  | -2.52545 | -0.48066 | 0.80688  |
| O  | -2.31262 | 0.16403  | 2.04976  |
| C  | -3.97384 | -0.14178 | 0.43079  |
| O  | -4.84262 | -0.60196 | 1.44253  |
| C  | -4.36264 | -0.78394 | -0.89675 |
| N  | -5.12460 | -1.88316 | -0.80701 |
| O  | -3.95701 | -0.30434 | -1.95558 |
| C  | -1.31924 | 1.33473  | -0.72229 |
| C  | -1.60361 | 2.45933  | 0.26085  |
| O  | 0.11048  | 1.37366  | -1.00839 |
| C  | 2.74918  | -0.88942 | -0.09916 |
| C  | 4.12740  | -0.98103 | 0.01152  |
| Cl | 4.88715  | -2.55579 | 0.04447  |
| C  | 4.91424  | 0.16530  | 0.09025  |
| C  | 4.30339  | 1.41223  | 0.06445  |
| H  | 2.94995  | 3.44517  | 0.07172  |
| H  | -1.65745 | -0.75995 | -1.11201 |
| H  | -2.47439 | -1.57273 | 0.94591  |
| H  | -1.45537 | -0.12771 | 2.40568  |
| H  | -4.07742 | 0.94261  | 0.29331  |
| H  | -4.46066 | -0.35392 | 2.30228  |
| H  | -5.42784 | -2.35105 | -1.65318 |
| H  | -5.47121 | -2.18990 | 0.09356  |
| H  | -1.84203 | 1.48947  | -1.66795 |
| H  | -2.66433 | 2.51434  | 0.51286  |
| H  | -1.04106 | 2.31645  | 1.18600  |
| H  | -1.30299 | 3.40580  | -0.19552 |
| H  | 2.13502  | -1.78252 | -0.16456 |
| H  | 5.99421  | 0.08578  | 0.17431  |
| H  | 4.90654  | 2.31447  | 0.13812  |

**2b** NMR Conformer 2

Energy: -910278.2625519

|   |         |         |          |
|---|---------|---------|----------|
| O | 2.47120 | 2.84107 | -0.09183 |
|---|---------|---------|----------|

|    |          |          |          |    |          |          |          |
|----|----------|----------|----------|----|----------|----------|----------|
| C  | 2.93599  | 1.57350  | -0.10581 | N  | 5.41362  | 0.34425  | -1.50097 |
| C  | 2.12827  | 0.42202  | -0.16159 | O  | 3.89173  | -1.34233 | -1.62568 |
| C  | 0.65754  | 0.46771  | -0.19935 | C  | 1.05896  | -1.46333 | 0.10452  |
| N  | -0.12962 | -0.52809 | -0.10016 | C  | 1.18750  | -1.89747 | 1.55469  |
| C  | -1.48704 | 0.00645  | -0.30311 | O  | -0.37379 | -1.37078 | -0.18183 |
| C  | -2.48096 | -0.81048 | 0.52003  | C  | -3.08307 | -0.64820 | -0.10516 |
| O  | -2.17180 | -0.82034 | 1.90126  | C  | -4.41058 | -0.26130 | -0.11014 |
| C  | -3.94456 | -0.35537 | 0.44828  | Cl | -5.66570 | -1.47839 | -0.05096 |
| O  | -4.75173 | -1.25906 | 1.17005  | C  | -4.76574 | 1.08912  | -0.15995 |
| C  | -4.42894 | -0.28595 | -0.99577 | C  | -3.77621 | 2.05899  | -0.20358 |
| N  | -5.21371 | -1.29646 | -1.39405 | H  | -0.60062 | 2.26372  | -0.22495 |
| O  | -4.07270 | 0.64502  | -1.71857 | H  | 1.80514  | -0.05196 | -1.35242 |
| C  | -1.33289 | 1.52148  | -0.04892 | H  | 2.85004  | 1.59683  | -0.01567 |
| C  | -1.53723 | 2.04738  | 1.36169  | H  | 1.69051  | 1.45649  | 1.93401  |
| O  | 0.08579  | 1.69504  | -0.36688 | H  | 3.91614  | -1.09929 | 0.93698  |
| C  | 2.73345  | -0.84484 | -0.16597 | H  | 4.65334  | 0.98503  | 1.89411  |
| C  | 4.10807  | -0.95874 | -0.11201 | H  | 5.74943  | 0.18253  | -2.44340 |
| Cl | 4.84593  | -2.54421 | -0.11945 | H  | 5.86696  | 1.03306  | -0.91328 |
| C  | 4.91923  | 0.17756  | -0.05459 | H  | 1.47115  | -2.21137 | -0.57469 |
| C  | 4.33006  | 1.42996  | -0.05261 | H  | 2.23328  | -2.01950 | 1.84274  |
| H  | 1.50036  | 2.85620  | -0.15944 | H  | 0.73597  | -1.16195 | 2.22358  |
| H  | -1.74510 | -0.14170 | -1.36016 | H  | 0.68009  | -2.85754 | 1.67801  |
| H  | -2.44304 | -1.83853 | 0.12554  | H  | -2.80783 | -1.69788 | -0.06735 |
| H  | -1.31699 | -1.26827 | 2.02546  | H  | -5.81367 | 1.37534  | -0.16382 |
| H  | -4.03868 | 0.65995  | 0.85557  | H  | -4.03207 | 3.11358  | -0.24212 |
| H  | -4.31687 | -1.43566 | 2.02250  |    |          |          |          |
| H  | -5.57648 | -1.30413 | -2.34030 |    |          |          |          |
| H  | -5.51147 | -2.00210 | -0.73167 |    |          |          |          |
| H  | -1.89607 | 2.10209  | -0.78132 |    |          |          |          |
| H  | -2.58177 | 1.96737  | 1.66805  |    |          |          |          |
| H  | -0.93178 | 1.48767  | 2.07773  |    |          |          |          |
| H  | -1.24918 | 3.10151  | 1.39018  |    |          |          |          |
| H  | 2.10069  | -1.72583 | -0.21307 |    |          |          |          |
| H  | 6.00004  | 0.07745  | -0.01395 |    |          |          |          |
| H  | 4.93683  | 2.32944  | -0.00874 |    |          |          |          |

**2b** NMR Conformer 1

Energy: -910282.6440677

|   |          |          |          |
|---|----------|----------|----------|
| O | -1.50370 | 2.67398  | -0.23517 |
| C | -2.42332 | 1.69630  | -0.19688 |
| C | -2.07994 | 0.32901  | -0.14921 |
| C | -0.66990 | -0.05852 | -0.15455 |
| N | 0.31234  | 0.76688  | -0.15224 |
| C | 1.53257  | -0.04486 | -0.28908 |
| C | 2.68332  | 0.61945  | 0.46488  |
| O | 2.40750  | 0.80571  | 1.84042  |
| C | 4.02212  | -0.13085 | 0.43050  |
| O | 5.01520  | 0.65222  | 1.05441  |
| C | 4.44796  | -0.43879 | -1.00105 |

**2a** NMR Conformer 7

Energy: -910283.8128669

|    |          |          |          |
|----|----------|----------|----------|
| O  | -0.93656 | 2.69158  | -0.57097 |
| C  | -1.85030 | 1.74502  | -0.30139 |
| C  | -1.56560 | 0.36614  | -0.38526 |
| C  | -0.22454 | -0.06874 | -0.77395 |
| N  | 0.73945  | 0.72971  | -1.05504 |
| C  | 1.91074  | -0.09540 | -1.35300 |
| C  | 3.13099  | 0.31224  | -0.52015 |
| O  | 3.75258  | 1.45863  | -1.08051 |
| C  | 2.87544  | 0.62075  | 0.97111  |
| O  | 4.09929  | 0.98704  | 1.57346  |
| C  | 2.30125  | -0.56469 | 1.73954  |
| N  | 3.21234  | -1.36886 | 2.31298  |
| O  | 1.08841  | -0.76580 | 1.77048  |
| C  | 1.41343  | -1.55329 | -1.16992 |
| C  | 1.54453  | -2.40578 | -2.41424 |
| O  | 0.01009  | -1.38765 | -0.84598 |
| C  | -2.55722 | -0.57669 | -0.08541 |
| C  | -3.81662 | -0.14468 | 0.28865  |
| Cl | -5.05706 | -1.31959 | 0.66594  |
| C  | -4.11414 | 1.21765  | 0.37262  |
| C  | -3.13475 | 2.15391  | 0.07917  |

|   |          |          |          |
|---|----------|----------|----------|
| H | -0.08439 | 2.24636  | -0.81925 |
| H | 2.20650  | 0.06826  | -2.39884 |
| H | 3.88149  | -0.48798 | -0.58370 |
| H | 3.08727  | 2.16536  | -1.17756 |
| H | 2.13519  | 1.43012  | 1.03856  |
| H | 4.55814  | 1.59742  | 0.97020  |
| H | 4.18491  | -1.08822 | 2.34644  |
| H | 2.89944  | -2.15939 | 2.86479  |
| H | 1.87737  | -2.04783 | -0.31016 |
| H | 2.60327  | -2.52983 | -2.66178 |
| H | 1.10693  | -3.39399 | -2.25612 |
| H | 1.04238  | -1.92337 | -3.25805 |
| H | -2.32672 | -1.63582 | -0.14808 |
| H | -5.10867 | 1.53954  | 0.66814  |
| H | -3.34533 | 3.21739  | 0.14048  |

**2a** NMR Conformer 6

Energy: -910278.4652751

|    |          |          |          |
|----|----------|----------|----------|
| O  | -0.95442 | 2.57185  | 0.27716  |
| C  | -1.86240 | 1.58800  | 0.10795  |
| C  | -1.57112 | 0.21879  | 0.24031  |
| C  | -0.23208 | -0.24686 | 0.64485  |
| N  | 0.38334  | -1.25903 | 0.17759  |
| C  | 1.69010  | -1.29313 | 0.84290  |
| C  | 2.82945  | -1.27288 | -0.18120 |
| O  | 2.96983  | -2.54851 | -0.78594 |
| C  | 2.71118  | -0.24438 | -1.33038 |
| O  | 3.83609  | -0.38136 | -2.17350 |
| C  | 2.65947  | 1.20225  | -0.85400 |
| N  | 3.84345  | 1.81614  | -0.74623 |
| O  | 1.58442  | 1.73497  | -0.56420 |
| C  | 1.66418  | -0.11663 | 1.85145  |
| C  | 1.75053  | -0.55447 | 3.29933  |
| O  | 0.37106  | 0.48615  | 1.61163  |
| C  | -2.56368 | -0.73487 | -0.01255 |
| C  | -3.84041 | -0.32458 | -0.35615 |
| Cl | -5.08213 | -1.52118 | -0.65110 |
| C  | -4.15233 | 1.03112  | -0.45974 |
| C  | -3.16362 | 1.97710  | -0.23315 |
| H  | -0.04288 | 2.22499  | 0.28433  |
| H  | 1.79883  | -2.24564 | 1.37962  |
| H  | 3.77533  | -1.08933 | 0.34706  |
| H  | 2.10053  | -2.82974 | -1.12778 |
| H  | 1.77492  | -0.43211 | -1.87354 |
| H  | 3.98170  | -1.33213 | -2.32203 |
| H  | 4.68066  | 1.36515  | -1.09622 |
| H  | 3.87816  | 2.78724  | -0.45628 |
| H  | 2.41972  | 0.64601  | 1.63312  |
| H  | 2.72750  | -1.01017 | 3.48686  |

|   |          |          |          |
|---|----------|----------|----------|
| H | 1.62896  | 0.29824  | 3.97108  |
| H | 0.97285  | -1.29297 | 3.51649  |
| H | -2.32226 | -1.78966 | 0.08248  |
| H | -5.15898 | 1.34152  | -0.72452 |
| H | -3.37774 | 3.03730  | -0.33031 |

**2a** NMR Conformer 5

Energy: -910284.8141272

|    |          |          |          |
|----|----------|----------|----------|
| O  | -1.05716 | -0.82763 | 2.57982  |
| C  | -1.91291 | -0.65398 | 1.55970  |
| C  | -1.62019 | 0.16448  | 0.44876  |
| C  | -0.32642 | 0.83826  | 0.37694  |
| N  | 0.56614  | 0.80392  | 1.29813  |
| C  | 1.75672  | 1.47013  | 0.75532  |
| C  | 2.84915  | 0.43880  | 0.44266  |
| O  | 3.20125  | -0.27964 | 1.61279  |
| C  | 2.50506  | -0.56132 | -0.67507 |
| O  | 1.48891  | -1.47385 | -0.32688 |
| C  | 3.79589  | -1.26720 | -1.11974 |
| N  | 3.72715  | -2.60393 | -1.20385 |
| O  | 4.80015  | -0.61127 | -1.39585 |
| C  | 1.21154  | 2.22936  | -0.46968 |
| C  | 0.89776  | 3.68580  | -0.18993 |
| O  | -0.03112 | 1.52246  | -0.74492 |
| C  | -2.55469 | 0.30969  | -0.58532 |
| C  | -3.76405 | -0.35597 | -0.50776 |
| Cl | -4.93461 | -0.17526 | -1.79447 |
| C  | -4.06631 | -1.17250 | 0.58525  |
| C  | -3.14459 | -1.31906 | 1.61007  |
| H  | -0.24389 | -0.28717 | 2.40854  |
| H  | 2.16523  | 2.16232  | 1.50112  |
| H  | 3.74095  | 0.98425  | 0.11382  |
| H  | 2.43012  | -0.34305 | 2.20318  |
| H  | 2.14990  | -0.01988 | -1.56171 |
| H  | 1.61552  | -1.75733 | 0.59702  |
| H  | 2.85758  | -3.08569 | -1.01614 |
| H  | 4.53090  | -3.12411 | -1.53545 |
| H  | 1.84084  | 2.12226  | -1.35827 |
| H  | 1.82657  | 4.23494  | -0.01170 |
| H  | 0.38154  | 4.13617  | -1.04040 |
| H  | 0.26416  | 3.77321  | 0.69837  |
| H  | -2.31994 | 0.94190  | -1.43626 |
| H  | -5.02101 | -1.68885 | 0.62966  |
| H  | -3.36119 | -1.94896 | 2.46763  |

**2a** NMR Conformer 4

Energy: -910280.6986064

|   |          |         |          |
|---|----------|---------|----------|
| O | -1.64024 | 2.56750 | -1.44848 |
| C | -2.25526 | 1.47698 | -0.94422 |

|    |          |          |          |
|----|----------|----------|----------|
| C  | -1.68083 | 0.57557  | -0.02814 |
| C  | -0.31419 | 0.71529  | 0.50019  |
| N  | 0.24068  | -0.04703 | 1.35761  |
| C  | 1.61530  | 0.43180  | 1.52982  |
| C  | 2.59662  | -0.63356 | 1.02977  |
| O  | 2.46426  | -1.81741 | 1.78896  |
| C  | 2.42421  | -0.94387 | -0.49710 |
| O  | 1.93234  | -2.23739 | -0.73617 |
| C  | 3.73543  | -0.66453 | -1.23485 |
| N  | 4.18534  | -1.64577 | -2.02764 |
| O  | 4.29464  | 0.42438  | -1.08856 |
| C  | 1.67876  | 1.76629  | 0.75414  |
| C  | 1.71428  | 2.99341  | 1.64069  |
| O  | 0.42341  | 1.75120  | 0.01436  |
| C  | -2.43153 | -0.52304 | 0.42140  |
| C  | -3.72110 | -0.71585 | -0.03030 |
| Cl | -4.64309 | -2.08706 | 0.54091  |
| C  | -4.30114 | 0.17248  | -0.94007 |
| C  | -3.56767 | 1.25675  | -1.38811 |
| H  | -0.73543 | 2.65456  | -1.10211 |
| H  | 1.81661  | 0.58642  | 2.59739  |
| H  | 3.61279  | -0.26336 | 1.19940  |
| H  | 1.51836  | -1.96462 | 1.97518  |
| H  | 1.70153  | -0.24606 | -0.94164 |
| H  | 2.22288  | -2.81158 | -0.00492 |
| H  | 3.65265  | -2.50075 | -2.12755 |
| H  | 5.02914  | -1.50682 | -2.57111 |
| H  | 2.48328  | 1.77905  | 0.01169  |
| H  | 2.65859  | 3.01753  | 2.19234  |
| H  | 1.63579  | 3.90502  | 1.04411  |
| H  | 0.89006  | 2.96534  | 2.36021  |
| H  | -1.97739 | -1.21192 | 1.12699  |
| H  | -5.31660 | 0.01192  | -1.29067 |
| H  | -3.99423 | 1.96229  | -2.09481 |

**2a NMR Conformer 3**

Energy: -910279.1517391

|   |          |          |          |
|---|----------|----------|----------|
| O | 2.10240  | -2.71592 | -0.32927 |
| C | 2.79157  | -1.55629 | -0.23474 |
| C | 2.08883  | -0.37114 | 0.03804  |
| C | 0.62841  | -0.33588 | 0.26552  |
| N | -0.12898 | 0.62833  | -0.09010 |
| C | -1.48546 | 0.28751  | 0.35717  |
| C | -2.38883 | 0.18877  | -0.87487 |
| O | -1.94449 | -0.84091 | -1.74331 |
| C | -3.85302 | -0.16508 | -0.57427 |
| O | -4.56906 | -0.29161 | -1.78299 |
| C | -4.51025 | 0.91049  | 0.28531  |
| N | -5.31667 | 1.75899  | -0.36875 |

|    |          |          |          |
|----|----------|----------|----------|
| O  | -4.26594 | 0.97592  | 1.49002  |
| C  | -1.32177 | -1.04205 | 1.13291  |
| C  | -1.61533 | -0.92473 | 2.61353  |
| O  | 0.08073  | -1.36603 | 0.94200  |
| C  | 2.78037  | 0.84379  | 0.08813  |
| C  | 4.15120  | 0.87302  | -0.11220 |
| Cl | 5.00215  | 2.39863  | -0.02970 |
| C  | 4.85962  | -0.29769 | -0.37014 |
| C  | 4.17559  | -1.50434 | -0.43390 |
| H  | 2.70308  | -3.45190 | -0.54762 |
| H  | -1.86581 | 1.08033  | 1.01044  |
| H  | -2.37080 | 1.15719  | -1.39765 |
| H  | -1.11308 | -0.56265 | -2.16505 |
| H  | -3.89292 | -1.10084 | 0.00254  |
| H  | -4.01621 | -0.79463 | -2.40551 |
| H  | -5.79012 | 2.49299  | 0.14485  |
| H  | -5.52036 | 1.61390  | -1.34979 |
| H  | -1.88805 | -1.85908 | 0.67470  |
| H  | -2.66671 | -0.65446 | 2.74721  |
| H  | -1.41180 | -1.86581 | 3.12991  |
| H  | -0.99726 | -0.13623 | 3.05518  |
| H  | 2.22833  | 1.75590  | 0.29350  |
| H  | 5.93457  | -0.26806 | -0.52270 |
| H  | 4.71527  | -2.42435 | -0.64755 |

**2a NMR Conformer 2**

Energy: -910282.4184279

|    |          |          |          |
|----|----------|----------|----------|
| O  | 2.42356  | 2.74750  | 0.66725  |
| C  | 2.88888  | 1.51373  | 0.37628  |
| C  | 2.09052  | 0.41929  | -0.00666 |
| C  | 0.62483  | 0.49176  | -0.14194 |
| N  | -0.13729 | -0.44729 | -0.54090 |
| C  | -1.51390 | 0.06036  | -0.48578 |
| C  | -2.29845 | -0.77899 | 0.52698  |
| O  | -1.74295 | -0.64959 | 1.82566  |
| C  | -3.77166 | -0.37947 | 0.69782  |
| O  | -4.37721 | -1.20931 | 1.66376  |
| C  | -4.53333 | -0.50416 | -0.61759 |
| N  | -5.31281 | -1.58851 | -0.73406 |
| O  | -4.38936 | 0.34517  | -1.49713 |
| C  | -1.37572 | 1.55301  | -0.10063 |
| C  | -1.74667 | 2.51036  | -1.21232 |
| O  | 0.04548  | 1.67505  | 0.19082  |
| C  | 2.70138  | -0.81344 | -0.28663 |
| C  | 4.07122  | -0.95059 | -0.18596 |
| Cl | 4.81476  | -2.49387 | -0.53762 |
| C  | 4.87293  | 0.12870  | 0.19416  |
| C  | 4.27841  | 1.34723  | 0.47125  |
| H  | 1.45480  | 2.78483  | 0.58325  |

|   |          |          |          |   |          |          |          |
|---|----------|----------|----------|---|----------|----------|----------|
| H | -1.98053 | -0.04630 | -1.47056 | H | -0.90390 | 2.24568  | -2.09417 |
| H | -2.26573 | -1.83029 | 0.20353  | H | 2.76076  | 1.61953  | 0.42141  |
| H | -0.90733 | -1.14612 | 1.86660  | H | 5.76505  | -1.40310 | -0.14723 |
| H | -3.83096 | 0.67704  | 0.99811  | H | 4.00029  | -3.03049 | -0.81045 |
| H | -3.77020 | -1.27721 | 2.42134  |   |          |          |          |
| H | -5.85421 | -1.72513 | -1.57971 |   |          |          |          |
| H | -5.43157 | -2.21712 | 0.05070  |   |          |          |          |
| H | -1.89351 | 1.79212  | 0.83264  |   |          |          |          |
| H | -2.80929 | 2.38888  | -1.44036 |   |          |          |          |
| H | -1.55242 | 3.54526  | -0.92093 |   |          |          |          |
| H | -1.16952 | 2.27903  | -2.11342 |   |          |          |          |
| H | 2.07601  | -1.65013 | -0.58244 |   |          |          |          |
| H | 5.95001  | 0.01116  | 0.27072  |   |          |          |          |
| H | 4.87746  | 2.20294  | 0.76800  |   |          |          |          |

### 2a NMR Conformer 1

Energy: -910287.1231174

|    |          |          |          |
|----|----------|----------|----------|
| O  | 1.48323  | -2.54792 | -0.93627 |
| C  | 2.39307  | -1.63152 | -0.56947 |
| C  | 2.04498  | -0.31038 | -0.21801 |
| C  | 0.63917  | 0.09506  | -0.24990 |
| N  | -0.32609 | -0.67586 | -0.59655 |
| C  | -1.56942 | 0.09181  | -0.47216 |
| C  | -2.46058 | -0.58435 | 0.57378  |
| O  | -1.83262 | -0.58505 | 1.84518  |
| C  | -3.81166 | 0.10805  | 0.80945  |
| O  | -4.52217 | -0.57223 | 1.81860  |
| C  | -4.64993 | 0.12833  | -0.46518 |
| N  | -5.64867 | -0.76436 | -0.51410 |
| O  | -4.37419 | 0.91231  | -1.37350 |
| C  | -1.09662 | 1.51510  | -0.08157 |
| C  | -1.35456 | 2.55847  | -1.14676 |
| O  | 0.34008  | 1.35530  | 0.10041  |
| C  | 3.03856  | 0.60434  | 0.15463  |
| C  | 4.36128  | 0.20163  | 0.17572  |
| Cl | 5.60391  | 1.34231  | 0.63884  |
| C  | 4.72105  | -1.10380 | -0.16864 |
| C  | 3.74097  | -2.01181 | -0.53815 |
| H  | 0.58349  | -2.12703 | -0.91907 |
| H  | -2.09241 | 0.10126  | -1.43382 |
| H  | -2.65763 | -1.61664 | 0.24723  |
| H  | -1.12283 | -1.25045 | 1.85261  |
| H  | -3.63972 | 1.15742  | 1.09203  |
| H  | -3.90202 | -0.76753 | 2.54226  |
| H  | -5.85656 | -1.34109 | 0.29165  |
| H  | -6.25045 | -0.79487 | -1.32884 |
| H  | -1.48816 | 1.82418  | 0.89206  |
| H  | -2.43415 | 2.65513  | -1.29291 |
| H  | -0.93746 | 3.52546  | -0.85648 |



## References

- (1) MacroModel, S., LLC, New York, NY, 2019.
- (2) Zhao, Y.; Truhlar, D. G., The M06 Suite Of Density Functionals For Main Group Thermochemistry, Thermochemical Kinetics, Noncovalent Interactions, Excited States, And Transition Elements: Two New Functionals And Systematic Testing Of Four M06-Class Functionals And 12 Other Functionals. *Theor. Chem. Acc.* **2008**, *120*, 215-241.
- (3) Becke, A. D., Density-functional Thermochemistry. III. The Role Of Exact Exchange. *J. Chem. Phys.* **1993**, *98*, 5648-5652.
- (4) Vosko, S. H.; Wilk, L.; Nusair, M., Accurate Spin-dependent Electron Liquid Correlation Energies For Local Spin Density Calculations: A Critical Analysis. *Can. J. Phys.* **1980**, *58*, 1200-1211.
- (5) Stephens, P. J.; Devlin, F. J.; Chabalowski, C. F.; Frisch, M. J., Ab Initio Calculation of Vibrational Absorption and Circular Dichroism Spectra Using Density Functional Force Fields. *J. Phys. Chem.* **1994**, *98*, 11623-11627.
- (6) Lee, C.; Yang, W.; Parr, R. G., Development Of The Colle-Salvetti Correlation-energy Formula Into A Functional Of The Electron Density. *Physical Review B* **1988**, *37*, 785-789.
- (7) Krishnan, R.; Binkley, J. S.; Seeger, R.; Pople, J. A., Self-consistent Molecular Orbital Methods. XX. A Basis Set For Correlated Wave Functions. *J. Chem. Phys.* **1980**, *72*, 650-654.
- (8) McLean, A. D.; Chandler, G. S., Contracted Gaussian Basis Sets For Molecular Calculations. I. Second Row Atoms, Z=11-18. *J. Chem. Phys.* **1980**, *72*, 5639-5648.
- (9) Grimblat, N.; Zanardi, M. M.; Sarotti, A. M., Beyond DP4: An Improved Probability For The Stereochemical Assignment Of Isomeric Compounds Using Quantum Chemical Calculations Of NMR Shifts. *J. Org. Chem.* **2015**, *80*, 12526-12534.
